# Supplementary material for: Effects of weaning on intestinal crypt epithelial cells in piglets
Source: PubMed Central journal article supplement (PMC5103268; doi:10.1038/srep36939), 2016-11-10
Supplement: srep36939-s1.pdf [file srep36939-s1.pdf]

## Supplementary Information

### Effects of weaning on intestinal crypt epithelial cells in piglets

Huansheng Yang<sup>1,2</sup>, Xia Xiong<sup>2</sup>, Xiaocheng Wang<sup>2</sup>, Tiejun Li<sup>2</sup> & Yulong Yin<sup>1,2,\*</sup>

<sup>1</sup>Animal Nutrition and Human Health Laboratory, School of Life Sciences, Hunan Normal University, Changsha, China

<sup>2</sup>Chinese Academy of Science, Institute of Subtropical Agriculture, Research Center for Healthy Breeding of Livestock and Poultry, Hunan Engineering and Research Center of Animal and Poultry Science and Key Laboratory for Agroecological Processes in Subtropical Region, Scientific Observation and Experimental Station of Animal Nutrition and Feed Science in South-Central, Ministry of Agriculture, Changsha, China

\*Correspondence: Yulong Yin

Chinese Academy of Science, Institute of Subtropical Agriculture

Yuandaer Road #644, 410125, Changsha, China

Tel: (86)-731-84619706

Fax: (86)-731-84612685

E-mail: yinyulong@isa.ac.cn (Y. Yin)

**Figure S1.** KEGG pathway enrichment of differentially expressed proteins in jejunal crypt epithelial cells of weaning piglets. Any protein with  $\geq 1.2$ -fold or  $\leq 0.8$ -fold difference in values measured from w1d, w3d, w5d, or w7d samples versus w0d level, and  $P$ -value  $\leq 0.05$ , was considered differentially expressed.

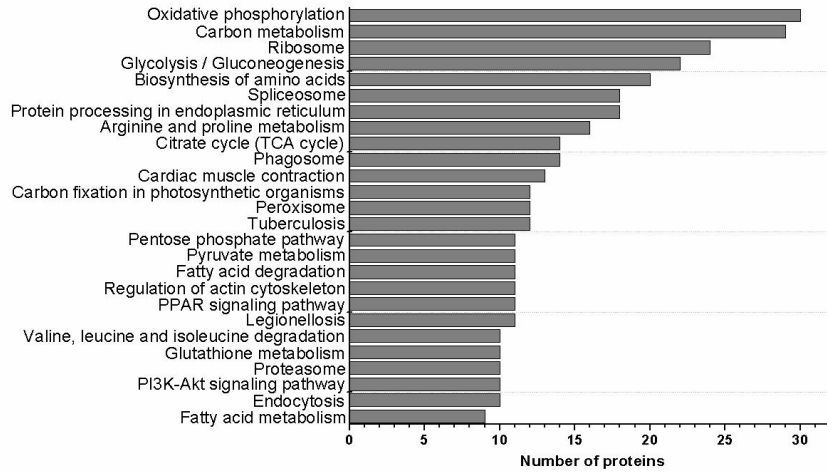

**Figure S2.** Proteins related to cell cycle in jejunal crypt epithelial cells of weaning piglets. Data are means  $\pm$  SD;  $n=5$ . For each panel, bars not labelled with same superscript indicate values are significantly different at  $P < 0.05$ .

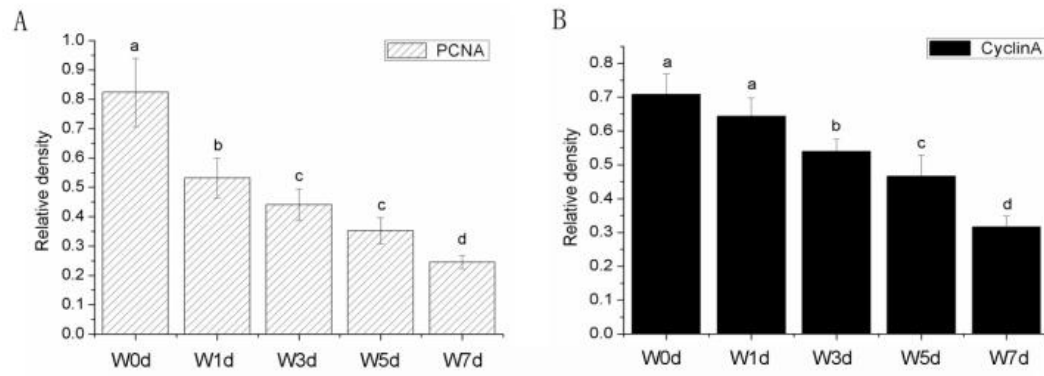

**Figure S3.** Proteins related to mTOR signaling pathway in jejunal crypt epithelial cells of weaning piglets. Data are means  $\pm$  SD;  $n=5$ . For each panel, bars not labelled with same superscript indicate values are significantly different at  $P < 0.05$ .

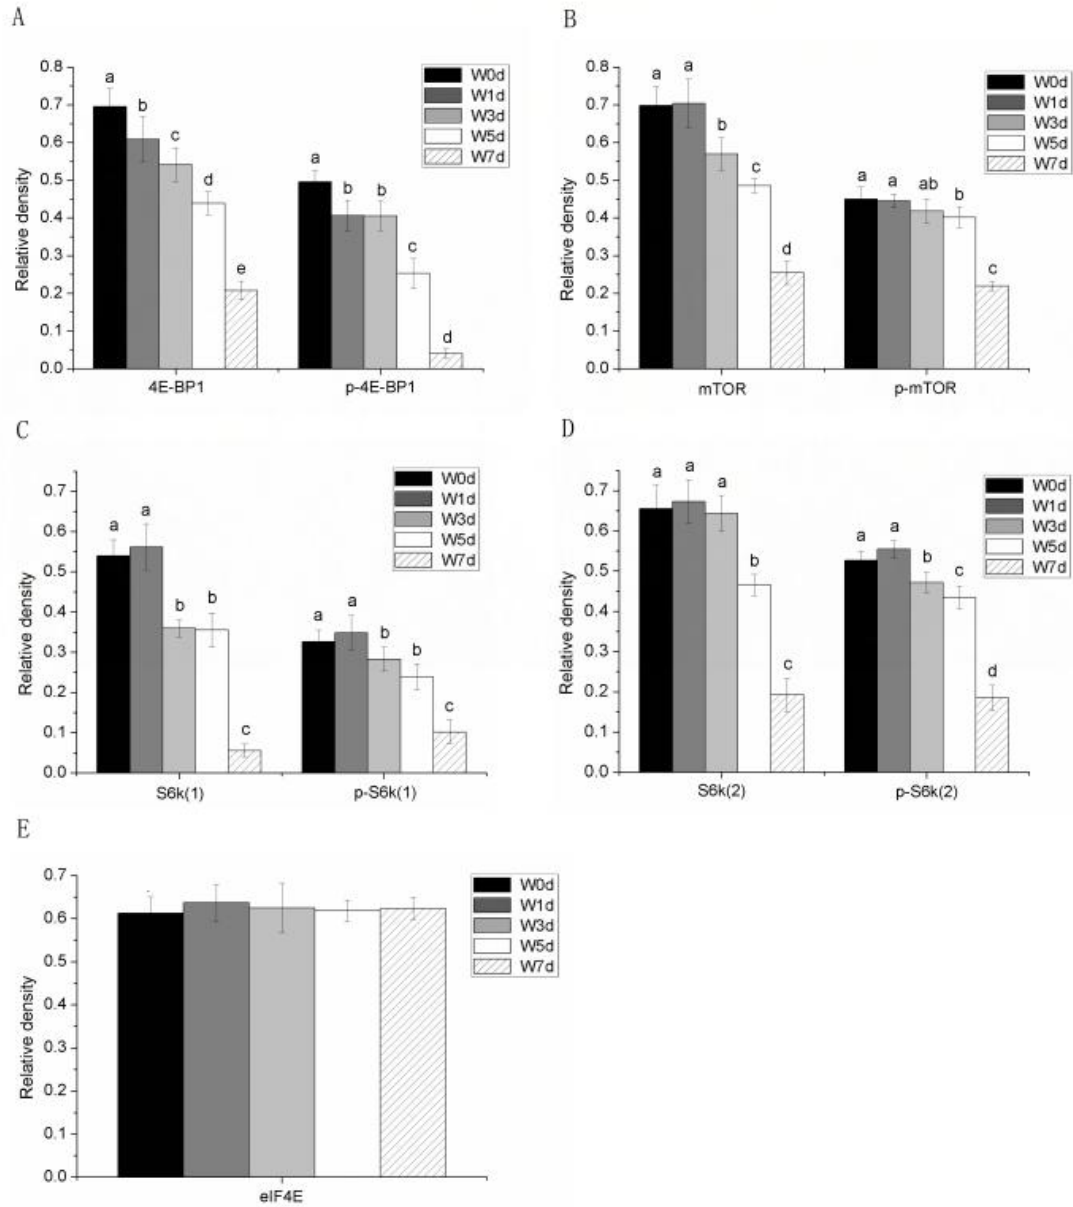

**Table S1**

Total identified proteins

| Accession                             | Description                                                                                                                                                                                                                                                                     | W1d<br>vs<br>W0d | W3d<br>vs<br>W0d | W5d<br>vs<br>W0d | W7d<br>vs<br>W0d |
|---------------------------------------|---------------------------------------------------------------------------------------------------------------------------------------------------------------------------------------------------------------------------------------------------------------------------------|------------------|------------------|------------------|------------------|
| gi 1706761 sp P49924.1 FAB<br>PL_PIG  | RecName: Full=Fatty acid-binding<br>protein, liver; AltName: Full=Fatty<br>acid-binding protein 1; AltName:<br>Full=Liver-type fatty acid-binding<br>protein;<br>Short=L-FABP >gi 55742707 ref NP_<br>001004046.1  fatty acid-binding<br>protein, liver [Sus scrofa] >gi 754910 | 1.365            | 1.226            | 1.187            | 0.588            |
| gi 71724936 gb AAZ38898.1             | intestinal fatty acid binding protein<br>[Sus scrofa]                                                                                                                                                                                                                           | 1.479            | 2.127            | 2.029            | 0.869            |
| gi 91206621 sp Q45KW7.3 F<br>ABPI_PIG | RecName: Full=Fatty acid-binding<br>protein, intestinal; AltName:<br>Full=Fatty acid-binding protein 2;<br>AltName: Full=Intestinal-type fatty<br>acid-binding protein;<br>Short=I-FABP >gi 72535172 ref NP_<br>001026950.1  fatty acid-binding<br>protein, intestinal [Sus scr |                  |                  |                  |                  |
| gi 350583843 ref XP_003126<br>114.3   | PREDICTED: myosin-9 [Sus scrofa]                                                                                                                                                                                                                                                | 0.607            | 0.849            | 0.925            | 0.691            |
| gi 1710817 sp P02632.3 S100<br>G_PIG  | RecName: Full=Protein S100-G;<br>AltName: Full=Calbindin-D9k;<br>AltName: Full=S100 calcium-binding<br>protein G; AltName: Full=Vitamin<br>D-dependent calcium-binding protein,<br>intestinal; Short=CABP; Contains:<br>RecName: Full=Protein S100-G,<br>minor isoform >gi 557  | 1.161            | 2.371            | 1.749            | 1.879            |
| gi 157830532 pdb 1CB1 A               | Chain A, Three-Dimensional Solution<br>Structure Of Ca <sup>2+</sup> -Loaded Porcine<br>Calbindin D9k Determined By<br>Nuclear Magnetic Resonance<br>Spectroscopy                                                                                                               |                  |                  |                  |                  |
| gi 45269029 gb AAS55927.1             | cytoskeletal beta actin, partial [Sus<br>scrofa]                                                                                                                                                                                                                                | 1.089            | 0.585            | 0.609            | 0.964            |
| gi 150438831 sp Q6QAQ1.2              | RecName: Full=Actin, cytoplasmic 1;                                                                                                                                                                                                                                             |                  |                  |                  |                  |

|                                     |                                                                                                                                                                                                                                                                                       |       |       |       |       |
|-------------------------------------|---------------------------------------------------------------------------------------------------------------------------------------------------------------------------------------------------------------------------------------------------------------------------------------|-------|-------|-------|-------|
| ACTB_PIG                            | AltName: Full=Beta-actin; Contains:<br>RecName: Full=Actin, cytoplasmic 1,<br>N-terminally<br>processed >gi 311250866 ref XP_003<br>124328.1  PREDICTED: actin,<br>cytoplasmic 1 [Sus scrofa]                                                                                         |       |       |       |       |
| gi 335297229 ref XP_003357<br>976.1 | PREDICTED: actin, cytoplasmic 2<br>[Sus scrofa]                                                                                                                                                                                                                                       |       |       |       |       |
| gi 169139278 gb ACA48587.<br>1      | liver fatty acid binding protein [Sus<br>scrofa]                                                                                                                                                                                                                                      | 0.903 | 1.628 | 1.294 | 0.917 |
| gi 227430407 ref NP_001153<br>087.1 | keratin, type II cytoskeletal 8 [Sus<br>scrofa]                                                                                                                                                                                                                                       | 0.605 | 0.616 | 0.767 | 0.663 |
| gi 194037554 ref XP_001929<br>445.1 | PREDICTED: ATP synthase subunit<br>beta, mitochondrial [Sus scrofa]                                                                                                                                                                                                                   | 0.748 | 0.423 | 0.355 | 0.607 |
| gi 297591975 ref NP_001172<br>071.1 | ATP synthase subunit alpha,<br>mitochondrial [Sus<br>scrofa] >gi 187370717 gb ACD02421<br>.1  cardiac muscle ATP synthase H+<br>transporting mitochondrial F1<br>complex alpha subunit 1 [Sus scrofa]                                                                                 | 0.768 | 0.706 | 0.723 | 0.799 |
| gi 350585373 ref XP_003127<br>406.3 | PREDICTED: myosin-14-like [Sus<br>scrofa]                                                                                                                                                                                                                                             | 0.667 | 0.776 | 0.842 | 0.605 |
| gi 359811347 ref NP_001241<br>645.1 | 60 kDa heat shock protein,<br>mitochondrial [Sus<br>scrofa] >gi 358009189 gb AET99216.<br>1  mitochondrial heat shock 60 kDa<br>protein 1 [Sus scrofa]                                                                                                                                | 0.742 | 0.835 | 0.735 | 0.78  |
| gi 358009193 gb AET99218.<br>1      | prolyl 4-hydroxylase beta polypeptide<br>[Sus scrofa]                                                                                                                                                                                                                                 | 0.456 | 0.471 | 0.513 | 0.357 |
| gi 311246557 ref XP_003122<br>249.1 | PREDICTED: spectrin alpha chain,<br>brain [Sus scrofa]                                                                                                                                                                                                                                | 0.858 | 1.364 | 1.308 | 1.148 |
| gi 47523848 ref NP_999562.1<br>     | dihydrolipoyllysine-residue<br>succinyltransferase component of<br>2-oxoglutarate dehydrogenase<br>complex, mitochondrial precursor<br>[Sus<br>scrofa] >gi 18203301 sp Q9N0F1.1 O<br>DO2_PIG RecName:<br>Full=Dihydrolipoyllysine-residue<br>succinyltransferase component of<br>2-ox | 0.491 | 0.642 | 0.769 | 0.443 |
| gi 350579657 ref XP_001927<br>830.3 | PREDICTED: 78 kDa<br>glucose-regulated protein [Sus scrofa]                                                                                                                                                                                                                           | 0.613 | 0.725 | 0.723 | 0.64  |

|                                  |                                                                                                                                                                                                                                                           |       |       |       |       |
|----------------------------------|-----------------------------------------------------------------------------------------------------------------------------------------------------------------------------------------------------------------------------------------------------------|-------|-------|-------|-------|
| gi 350593858 ref XP_003133682.3  | PREDICTED: carbamoyl-phosphate synthase [ammonia], mitochondrial isoform 1 [Sus scrofa]                                                                                                                                                                   | 1.256 | 0.64  | 0.507 | 0.899 |
| gi 350588218 ref XP_003129667.3  | PREDICTED: nuclear mitotic apparatus protein 1-like [Sus scrofa]                                                                                                                                                                                          | 0.867 | 0.978 | 1.042 | 0.815 |
| gi 48675927 ref NP_001001632.1   | tropomyosin alpha-3 chain [Sus scrofa] >gi 45272586 gb AAS57724.1  tropomyosin 3 [Sus scrofa]                                                                                                                                                             | 0.426 | 1.649 | 1.82  | 1.29  |
| gi 346644743 ref NP_001231138.1  | calmodulin 3 [Sus scrofa] >gi 346644746 ref NP_001231139.1  calmodulin 1 [Sus scrofa] >gi 311252670 ref XP_003125211.1  PREDICTED: calmodulin-like [Sus scrofa]                                                                                           | 1.687 | 2.281 | 4.172 | 2.23  |
| gi 335289608 ref XP_003355931.1  | PREDICTED: alpha-actinin-4-like isoform 2 [Sus scrofa]                                                                                                                                                                                                    | 1.441 | 1.12  | 1.304 | 1.286 |
| gi 335289612 ref XP_003127168.2  | PREDICTED: alpha-actinin-4-like isoform 1 [Sus scrofa]                                                                                                                                                                                                    |       |       |       |       |
| gi 311273061 ref XP_001925202.2  | PREDICTED: villin 1 [Sus scrofa]                                                                                                                                                                                                                          | 1.437 | 1.059 | 0.998 | 1.99  |
| gi 85701138 sp Q3ZD69.1 LMNA_PIG | RecName: Full=Prelamin-A/C; Contains: RecName: Full=Lamin-A/C; Flags: Precursor >gi 162139823 ref NP_001104727.1  prelamina-A/C [Sus scrofa] >gi 66352014 gb AAY44741.1  lamin A [Sus scrofa]                                                             | 0.944 | 0.905 | 0.832 | 0.902 |
| gi 46396062 sp Q865F1.1 MTP_PIG  | RecName: Full=Microsomal triglyceride transfer protein large subunit; Flags: Precursor >gi 47523450 ref NP_999350.1  microsomal triglyceride transfer protein large subunit precursor [Sus scrofa] >gi 28974486 gb AAO61497.1  microsomal triglyceride tr | 0.965 | 0.461 | 0.435 | 0.601 |
| gi 984249 emb CAA62352.1         | protein kinase [Sus scrofa]                                                                                                                                                                                                                               | ---   | ---   | ---   | ---   |
| gi 17865698 sp Q29092.3 ENPL_PIG | RecName: Full=Endoplasmic reticulum glucose-regulated protein; AltName: Full=94 kDa glucose-regulated protein; Short=GRP-94; AltName: Full=98 kDa protein kinase; Short=PPK 98; Short=ppk98; AltName: Full=Heat shock protein 90 kDa beta member 1;       |       |       |       |       |

|                                    |                                                                                                                                                                                                                                                           |       |       |       |       |
|------------------------------------|-----------------------------------------------------------------------------------------------------------------------------------------------------------------------------------------------------------------------------------------------------------|-------|-------|-------|-------|
|                                    | AltName: Full=gp96 homolog; Flags:<br>Precur                                                                                                                                                                                                              |       |       |       |       |
| gi 47523016 ref NP_999268.1        | endoplasmin precursor [Sus scrofa] >gi 2239253 emb CAA70347.1  gp96/GRP94 [Sus scrofa]                                                                                                                                                                    | 1.336 | 0.741 | 1.314 | 0.855 |
| gi 343962597 ref NP_001230636.1    | cytosolic non-specific dipeptidase [Sus scrofa]                                                                                                                                                                                                           | 1.6   | 3.758 | 3.289 | 2.765 |
| gi 332278130 sp Q29261.2 VILLI_PIG | RecName: Full=Villin-1                                                                                                                                                                                                                                    | 1.978 | 1.393 | 1.137 | 1.456 |
| gi 350591286 ref XP_003132317.3    | PREDICTED: filamin-B-like [Sus scrofa]                                                                                                                                                                                                                    | 1.296 | 1.839 | 2.223 | 1.706 |
| gi 225450 prf 1303334A             | valosin precursor                                                                                                                                                                                                                                         | 1.408 | 0.778 | 0.889 | 1.181 |
| gi 47523628 ref NP_999442.1        | aminopeptidase N [Sus scrofa] >gi 1703286 sp P15145.3 AMPN_PIG RecName: Full=Aminopeptidase N; Short=AP-N; Short=pAPN; AltName: Full=Alanyl aminopeptidase; AltName: Full=Aminopeptidase M; Short=AP-M; AltName: Full=Microsomal aminopeptidase; AltName: | 0.377 | 0.514 | 0.611 | 0.898 |
| gi 225735709 ref NP_001139599.1    | clathrin heavy chain 1 [Sus scrofa] >gi 224492556 emb CAR65329.1  clathrin heavy chain [Sus scrofa]                                                                                                                                                       | 1.218 | 0.807 | 0.717 | 1.26  |
| gi 311267276 ref XP_003131485.1    | PREDICTED: keratin, type I cytoskeletal 19-like [Sus scrofa]                                                                                                                                                                                              | 0.627 | 0.634 | 0.765 | 0.792 |
| gi 311264042 ref XP_003129970.1    | PREDICTED: hypoxia up-regulated protein 1 [Sus scrofa]                                                                                                                                                                                                    | 0.691 | 0.661 | 0.727 | 0.648 |
| gi 164382 gb AAA31002.1            | Na+, K+-ATPase alpha-subunit precursor [Sus scrofa]                                                                                                                                                                                                       | 0.797 | 0.422 | 0.473 | 0.725 |
| gi 283443670 gb ADB19852.1         | Na+/K+ transporting alpha 1 polypeptide [Sus scrofa]                                                                                                                                                                                                      |       |       |       |       |
| gi 225173 prf 1210234A             | ATPase alpha,Na/K                                                                                                                                                                                                                                         |       |       |       |       |
| gi 393714792 dbj BAM28740.1        | sodium/potassium-transporting ATPase subunit alpha-1, partial [Sus scrofa]                                                                                                                                                                                |       |       |       |       |
| gi 194038728 ref XP_001929104.1    | PREDICTED: pyruvate kinase isozymes M1/M2 isoform 1 [Sus scrofa]                                                                                                                                                                                          | 2.09  | 1.004 | 1.201 | 2.004 |
| gi 345441750 ref NP_001230836.1    | heat shock 70kDa protein 8 [Sus scrofa]                                                                                                                                                                                                                   | 1.383 | 0.961 | 0.98  | 1.398 |



|                                 |                                                                                                                                                                                                                                                            |       |       |       |       |
|---------------------------------|------------------------------------------------------------------------------------------------------------------------------------------------------------------------------------------------------------------------------------------------------------|-------|-------|-------|-------|
| gi 311273928 ref XP_003134106.1 | PREDICTED: nucleophosmin-like isoform 2 [Sus scrofa]                                                                                                                                                                                                       | 0.919 | 1.022 | 1.439 | 0.668 |
| gi 311273930 ref XP_003134105.1 | PREDICTED: nucleophosmin-like isoform 1 [Sus scrofa]                                                                                                                                                                                                       |       |       |       |       |
| gi 350585579 ref XP_003481996.1 | PREDICTED: alpha-enolase-like, partial [Sus scrofa]                                                                                                                                                                                                        | 1.597 | 1.466 | 1.565 | 1.341 |
| gi 54873401 gb AAV40980.1       | heat shock 60 kDa protein 1 [Sus scrofa]                                                                                                                                                                                                                   | 1.229 | 0.463 | 0.45  | 0.587 |
| gi 311252615 ref XP_003125184.1 | PREDICTED: ubiquitin-40S ribosomal protein S27a-like [Sus scrofa] >gi 311252617 ref XP_003125185.1  PREDICTED: ubiquitin-40S ribosomal protein S27a-like [Sus scrofa]                                                                                      | 1.316 | 3.017 | 2.609 | 1.82  |
| gi 164414678 emb CAO81735.1     | Alternative Pig Liver Esterase [Sus scrofa]                                                                                                                                                                                                                | 0.927 | 1.243 | 1.579 | 1.871 |
| gi 47522754 ref NP_999127.1     | trifunctional enzyme subunit alpha, mitochondrial [Sus scrofa] >gi 7387634 sp Q29554.1 EC HA_PIG RecName: Full=Trifunctional enzyme subunit alpha, mitochondrial; AltName: Full=78 kDa gastrin-binding protein; AltName: Full=TP-alpha; Includes: RecName: | ---   | ---   | ---   | ---   |
| gi 304365428 ref NP_001182041.1 | protein disulfide-isomerase A3 precursor [Sus scrofa] >gi 301016769 dbj BAJ11757.1  glucose regulated protein 58 [Sus scrofa]                                                                                                                              | 0.492 | 1.192 | 1.152 | 0.772 |
| gi 187370723 gb ACD02424.1      | hydroxyacyl-coenzyme A dehydrogenase/3-ketoacyl-coenzyme A thiolase/enoyl-coenzyme A hydratase alpha subunit [Sus scrofa]                                                                                                                                  | ---   | ---   | ---   | ---   |
| gi 350593231 ref XP_003359478.2 | PREDICTED: lactase-phlorizin hydrolase-like [Sus scrofa]                                                                                                                                                                                                   | 0.691 | 0.999 | 0.733 | 0.7   |
| gi 47522774 ref NP_999138.1     | heat shock protein HSP 90-alpha [Sus scrofa] >gi 6016267 sp O02705.3 HS90A_PIG RecName: Full=Heat shock protein HSP 90-alpha >gi 1945447 gb AAC48718.1  90-kDa heat shock protein [Sus scrofa]                                                             | 1.901 | 1.11  | 1.112 | 1.877 |

|                                   |                                                                                                                                                                                                                                                           |       |       |       |       |
|-----------------------------------|-----------------------------------------------------------------------------------------------------------------------------------------------------------------------------------------------------------------------------------------------------------|-------|-------|-------|-------|
| gi 297591979 ref NP_001172070.1   | ornithine aminotransferase, mitochondrial [Sus scrofa] >gi 166244455 gb ABY86572.1  mitochondrial ornithine aminotransferase [Sus scrofa]                                                                                                                 | 1.701 | 1.067 | 0.856 | 1.434 |
| gi 335287713 ref XP_003355423.1   | PREDICTED: tubulin alpha-1C chain isoform 1 [Sus scrofa]                                                                                                                                                                                                  | ---   | ---   | ---   | ---   |
| gi 311267326 ref XP_003131510.1   | PREDICTED: keratin, type I cytoskeletal 20-like [Sus scrofa]                                                                                                                                                                                              | 0.64  | 0.647 | 0.745 | 0.864 |
| gi 350594669 ref XP_001926037.4   | PREDICTED: ribosome-binding protein 1 [Sus scrofa]                                                                                                                                                                                                        | 0.571 | 1.008 | 0.992 | 0.8   |
| gi 356460899 ref NP_999466.2      | catalase [Sus scrofa]                                                                                                                                                                                                                                     | 0.83  | 1.677 | 1.644 | 1.541 |
| gi 2494384 sp Q29550.1 EST1_PIG   | RecName: Full=Liver carboxylesterase; AltName: Full=Proline-beta-naphthylamidase; AltName: Full=Retinyl ester hydrolase; Short=REH; Flags: Precursor >gi 363817363 emb CCF23015.1  unnamed protein product [Sus scrofa] >gi 1931 emb CAA44929.1  carboxyl | ---   | ---   | ---   | ---   |
| gi 218314621 emb CAV28734.1       | unnamed protein product [Sus sp.]                                                                                                                                                                                                                         |       |       |       |       |
| gi 297747302 ref NP_001172115.1   | aspartyl aminopeptidase [Sus scrofa]                                                                                                                                                                                                                      | 0.913 | 2.217 | 1.765 | 0.631 |
| gi 335283403 ref XP_003123930.2   | PREDICTED: lamin-B1 [Sus scrofa]                                                                                                                                                                                                                          | 0.698 | 0.956 | 0.966 | 0.827 |
| gi 47522618 ref NP_999099.1       | vinculin [Sus scrofa] >gi 17979613 gb AAL50327.1  vinculin [Sus scrofa]                                                                                                                                                                                   | 1.921 | 1.133 | 1.151 | 1.468 |
| gi 50403675 sp P26234.4 VIN C_PIG | RecName: Full=Vinculin; AltName: Full=Metavinculin                                                                                                                                                                                                        |       |       |       |       |
| gi 194043861 ref XP_001928233.1   | PREDICTED: tubulin alpha-1D chain [Sus scrofa]                                                                                                                                                                                                            | 0.839 | 0.202 | 0.171 | 0.878 |
| gi 401871556 pdb 4F5C A           | Chain A, Crystal Structure Of The Spike Receptor Binding Domain Of A Porcine Respiratory Coronavirus In Complex With The Pig Aminopeptidase N Ectodomain >gi 401871557 pdb 4F5C B Chain B, Crystal Structure Of The Spike Receptor Binding Domain Of      | ---   | ---   | ---   | ---   |

|                                 |                                                                                                                                                                                                                                                           |       |       |       |       |
|---------------------------------|-----------------------------------------------------------------------------------------------------------------------------------------------------------------------------------------------------------------------------------------------------------|-------|-------|-------|-------|
|                                 | A Po                                                                                                                                                                                                                                                      |       |       |       |       |
| gi 343790893 ref NP_001230504.1 | creatine kinase, brain [Sus scrofa]                                                                                                                                                                                                                       | 1.616 | 0.641 | 0.774 | 0.917 |
| gi 47523572 ref NP_999411.1     | liver carboxylesterase precursor [Sus scrofa] >gi 3831588 gb AAC70013.1  carboxylesterase [Sus scrofa]                                                                                                                                                    | 1.484 | 1.46  | 2.039 | 2.172 |
| gi 311250237 ref XP_003124024.1 | PREDICTED: stress-70 protein, mitochondrial [Sus scrofa]                                                                                                                                                                                                  | 0.877 | 0.886 | 0.721 | 0.961 |
| gi 350591288 ref XP_003483241.1 | PREDICTED: filamin-B [Sus scrofa]                                                                                                                                                                                                                         | 1.059 | 1.552 | 1.546 | 1.5   |
| gi 346986466 ref NP_001231384.1 | proteasome (prosome, macropain) subunit, beta type, 4 [Sus scrofa]                                                                                                                                                                                        | 1.495 | 2.265 | 3.011 | 1.72  |
| gi 347300207 ref NP_001231417.1 | nucleobindin-1 precursor [Sus scrofa]                                                                                                                                                                                                                     | 0.672 | 1.095 | 1.007 | 0.739 |
| gi 47522738 ref NP_999119.1     | aconitate hydratase, mitochondrial precursor [Sus scrofa] >gi 113159 sp P16276.1 ACON_PIG RecName: Full=Aconitate hydratase, mitochondrial; Short=Aconitase; AltName: Full=Citrate hydro-lyase; Flags: Precursor >gi 164315 gb AAA30987.1  heart aconitas | 1.77  | 1.054 | 1.058 | 1.686 |
| gi 157837131 pdb 7ACN A         | Chain A, Crystal Structures Of Aconitase With Isocitrate And Nitroisocitrate Bound >gi 157837084 pdb 6ACN A Chain A, Structure Of Activated Aconitase. Formation Of The (4fe-4s) Cluster In The Crystal >gi 157837014 pdb 5ACN A Chain A, Structure Of Ac |       |       |       |       |
| gi 335303414 ref XP_001928370.3 | PREDICTED: tubulin alpha-4A chain [Sus scrofa]                                                                                                                                                                                                            | 1.239 | 0.76  | 0.683 | 1.233 |
| gi 350591605 ref XP_003483304.1 | PREDICTED: plastin-1-like [Sus scrofa]                                                                                                                                                                                                                    | 1.46  | 1.001 | 0.985 | 1.418 |
| gi 349501107 ref NP_001231795.1 | ribosomal protein, large, P2 [Sus scrofa]                                                                                                                                                                                                                 | 0.63  | 1.484 | 1.372 | 0.685 |
| gi 350579435 ref XP_003122094.3 | PREDICTED: fructose-bisphosphate aldolase B-like, partial [Sus scrofa]                                                                                                                                                                                    | 1.468 | 1.198 | 1.169 | 1.175 |
| gi 392513715 ref NP_001254774.1 | heterogeneous nuclear ribonucleoprotein K [Sus scrofa]                                                                                                                                                                                                    | 1.038 | 1.824 | 1.233 | 1.272 |

|                                 |                                                                                                                                                                                                                                                           |       |       |       |       |
|---------------------------------|-----------------------------------------------------------------------------------------------------------------------------------------------------------------------------------------------------------------------------------------------------------|-------|-------|-------|-------|
| gi 47523730 ref NP_999500.1     | tropomyosin alpha-4 chain [Sus scrofa] >gi 54039746 sp P67937.3 TPM4_PIG RecName: Full=Tropomyosin alpha-4 chain; AltName: Full=Tropomyosin-4 >gi 3661527 gb AAC61744.1  tropomyosin 4 [Sus scrofa] >gi 262263207 dbj BAI48106.1  tropomyosin 4 [Sus scro | 0.496 | 0.857 | 0.634 | 0.489 |
| gi 311259005 ref XP_003127890.1 | PREDICTED: myosin regulatory light chain 12B isoform 2 [Sus scrofa] >gi 311259003 ref XP_003127889.1  PREDICTED: myosin regulatory light chain 12B isoform 1 [Sus scrofa]                                                                                 | 0.262 | 0.4   | 0.545 | 0.347 |
| gi 346716324 ref NP_001231180.1 | myosin regulatory light chain 2 protein isoform 2 [Sus scrofa]                                                                                                                                                                                            |       |       |       |       |
| gi 999620 pdb 1MLD D            | Chain D, Refined Structure Of Mitochondrial Malate Dehydrogenase From Porcine Heart And The Consensus Structure For Dicarboxylic Acid Oxidoreductases >gi 999618 pdb 1MLD B Chain B, Refined Structure Of Mitochondrial Malate Dehydrogenase From Porcine | 2.014 | 1.057 | 0.879 | 1.832 |
| gi 2506849 sp P00346.2 MDHM_PIG | RecName: Full=Malate dehydrogenase, mitochondrial; Flags: Precursor                                                                                                                                                                                       |       |       |       |       |
| gi 350581138 ref XP_003124036.3 | PREDICTED: catenin alpha-1 isoform 1 [Sus scrofa]                                                                                                                                                                                                         | 1.094 | 0.881 | 0.907 | 0.976 |
| gi 335306989 ref XP_003130411.2 | PREDICTED: ATP-dependent RNA helicase A-like [Sus scrofa]                                                                                                                                                                                                 | 1.146 | 0.78  | 0.777 | 0.994 |
| gi 350593236 ref XP_003359477.2 | PREDICTED: lactase-phlorizin hydrolase-like, partial [Sus scrofa]                                                                                                                                                                                         | ---   | ---   | ---   | ---   |
| gi 311247536 ref XP_003122689.1 | PREDICTED: bifunctional ATP-dependent dihydroxyacetone kinase/FAD-AMP lyase (cyclizing)-like [Sus scrofa]                                                                                                                                                 | 1.863 | 0.874 | 0.935 | 1.222 |
| gi 335280610 ref XP_003353615.1 | PREDICTED: LOW QUALITY PROTEIN: talin-1 [Sus scrofa]                                                                                                                                                                                                      | 1.338 | 1.018 | 1.273 | 1.171 |
| gi 268607671 ref NP_001161267.1 | actin, alpha skeletal muscle [Sus scrofa] >gi 62287931 sp P68137.1 AC                                                                                                                                                                                     | 1.216 | 0.517 | 0.418 | 1.334 |

|                                   |                                                                                                                                                                                                                                                           |       |       |       |       |
|-----------------------------------|-----------------------------------------------------------------------------------------------------------------------------------------------------------------------------------------------------------------------------------------------------------|-------|-------|-------|-------|
|                                   | TS_PIG RecName: Full=Actin, alpha skeletal muscle; AltName: Full=Alpha-actin-1; Flags: Precursor >gi 790202 gb AAC48692.1  skeletal alpha actin [Sus scrofa]                                                                                              |       |       |       |       |
| gi 281427360 ref NP_001163988.1   | actin, alpha cardiac muscle 1 [Sus scrofa] >gi 210077998 emb CAR82077.1  cardiac muscle alpha actin 1 [Sus scrofa] >gi 210077994 emb CAR82075.1  cardiac muscle alpha actin 1 [Sus scrofa] >gi 210077996 emb CAR82076.1  cardiac muscle alpha actin 1 [Su |       |       |       |       |
| gi 56748897 sp Q6S4N2.1 HS71B_PIG | RecName: Full=Heat shock 70 kDa protein 1B; AltName: Full=Heat shock 70 kDa protein 2; Short=HSP70.2 >gi 47523308 ref NP_998931.1  heat shock 70 kDa protein 1B [Sus scrofa] >gi 39777368 gb AAR30953.1  heat shock protein 70.2 [Sus scrofa] >gi 1487249 | 1.002 | 1.197 | 1.071 | 0.58  |
| gi 346986428 ref NP_001231362.1   | heat shock 90kD protein 1, beta [Sus scrofa]                                                                                                                                                                                                              | 1.86  | 1.323 | 0.967 | 2.418 |
| gi 346986249 ref NP_001231282.1   | proteasome subunit beta type-1 [Sus scrofa]                                                                                                                                                                                                               | 1.43  | 2.595 | 2.883 | 1.853 |
| gi 392513702 ref NP_001254763.1   | protein disulfide isomerase family A, member 4 precursor [Sus scrofa]                                                                                                                                                                                     | 0.946 | 1.025 | 1.023 | 1.005 |
| gi 255683394 ref NP_001157474.1   | ornithine carbamoyltransferase, mitochondrial [Sus scrofa]                                                                                                                                                                                                | 0.91  | 1.058 | 1.682 | 1.552 |
| gi 304365440 ref NP_001182048.1   | protein disulfide-isomerase A6 precursor [Sus scrofa] >gi 301016767 dbj BAJ11758.1  protein disulfide isomerase P5 [Sus scrofa]                                                                                                                           | 1.046 | 0.969 | 0.942 | 1.025 |
| gi 164318 gb AAA30988.1           | albumin, partial [Sus scrofa]                                                                                                                                                                                                                             | 1.129 | 0.611 | 0.569 | 0.712 |
| gi 833798 emb CAA30970.1          | albumin [Sus scrofa]                                                                                                                                                                                                                                      |       |       |       |       |
| gi 47522844 ref NP_999174.1       | complement C3 precursor [Sus scrofa] >gi 11869931 gb AAG40565.1 AF154933_1 complement component C3 [Sus scrofa] >gi 27801787 emb CAD38823.2  complement C3 precursor [Sus scrofa]                                                                         | 0.64  | 0.917 | 0.806 | 1.028 |

|                                 |                                                                                                                                                                                                                                                           |       |       |       |       |
|---------------------------------|-----------------------------------------------------------------------------------------------------------------------------------------------------------------------------------------------------------------------------------------------------------|-------|-------|-------|-------|
| gi 311259466 ref XP_003128111.1 | PREDICTED: putative hydroxypyruvate isomerase-like isoform 1 [Sus scrofa]                                                                                                                                                                                 | 1.019 | 2.107 | 1.793 | 1.053 |
| gi 112980811 gb ABI29187.1      | glyceraldehyde-3-phosphate dehydrogenase [Sus scrofa]                                                                                                                                                                                                     | 2.033 | 1.297 | 0.982 | 2.414 |
| gi 329744642 ref NP_001193288.1 | glyceraldehyde-3-phosphate dehydrogenase [Sus scrofa] >gi 2506441 sp P00355.4 G3P_PIG RecName: Full=Glyceraldehyde-3-phosphate dehydrogenase; Short=GAPDH; AltName: Full=Peptidyl-cysteine S-nitrosylase GAPDH                                            |       |       |       |       |
| gi 47522864 ref NP_999186.1     | unconventional myosin-VI [Sus scrofa] >gi 75039721 sp Q29122.1 M YO6_PIG RecName: Full=Unconventional myosin-VI; AltName: Full=Unconventional myosin-6 >gi 516155 emb CAA84559.1  unconventional myosin [Sus scrofa]                                      | 0.847 | 0.744 | 0.911 | 0.63  |
| gi 230506 pdb 2FBP A            | Chain A, Structure Refinement Of Fructose-1,6-Bisphosphatase And Its Fructose 2,6-Bisphosphate Complex At 2.8 Angstroms Resolution >gi 230507 pdb 2FBP B Chain B, Structure Refinement Of Fructose-1,6-Bisphosphatase And Its Fructose 2,6-Bisphosphate C | 1.622 | 1.109 | 0.814 | 0.793 |
| gi 99032141 pdb 2F3H A          | Chain A, Mechanism Of Displacement Of A Catalytically Essential Loop From The Active Site Of Fructose-1,6-Bisphosphatase >gi 99032142 pdb 2F3H B Chain B, Mechanism Of Displacement Of A Catalytically Essential Loop From The Active Site Of Fructose-1, |       |       |       |       |
| gi 24987483 pdb 1KZ8 A          | Chain A, Crystal Structure Of Porcine Fructose-1,6-Bisphosphatase Complexed With A Novel Allosteric-Site Inhibitor >gi 24987484 pdb 1KZ8 F                                                                                                                |       |       |       |       |

|                                   |                                                                                                                                                                                                                                                                        |       |       |       |       |
|-----------------------------------|------------------------------------------------------------------------------------------------------------------------------------------------------------------------------------------------------------------------------------------------------------------------|-------|-------|-------|-------|
|                                   | Chain F, Crystal Structure Of Porcine Fructose-1,6-Bisphosphatase Complexed With A Novel Allosteric-Site Inhib                                                                                                                                                         |       |       |       |       |
| gi 47522784 ref NP_999144.1       | fructose-1,6-bisphosphatase 1 [Sus scrofa] >gi 1706735 sp P00636.4 F16 P1_PIG RecName: Full=Fructose-1,6-bisphosphatase 1; Short=FBPase 1; AltName: Full=D-fructose-1,6-bisphosphate 1-phosphohydrolase 1 >gi 300654514 emb CBV02317.1  unnamed protein pr             |       |       |       |       |
| gi 33357497 pdb 1NV1 A            | Chain A, Fructose-1,6-Bisphosphatase Complex With Magnesium, Fructose-6- Phosphate, Phosphate And Thallium (5 Mm) >gi 159795376 pdb 2QVV A Chain A, Porcine Liver Fructose-1,6-Bisphosphatase Cocrystallized With Fru-2,6-P2 And Zn <sup>2+</sup> , I(T)-State >gi 159 |       |       |       |       |
| gi 24987566 pdb 1LEV F            | Chain F, Porcine Kidney Fructose-1,6-Bisphosphatase Complexed With An Amp-Site Inhibitor >gi 24987565 pdb 1LEV A Chain A, Porcine Kidney Fructose-1,6-Bisphosphatase Complexed With An Amp-Site Inhibitor                                                              |       |       |       |       |
| gi 3288991 gb AAC25597.1          | fructose-1,6-bisphosphatase [Sus scrofa]                                                                                                                                                                                                                               |       |       |       |       |
| gi 387912908 sp P28491.3 CALR_PIG | RecName: Full=Calreticulin; AltName: Full=CRP55; AltName: Full=Calregulin; AltName: Full=Endoplasmic reticulum resident protein 60; Short=ERp60; AltName: Full=HACBP; Flags: Precursor >gi 291622246 ref NP_001167604.1  calreticulin precursor [Sus scro              | 0.91  | 0.589 | 0.581 | 0.836 |
| gi 343887360 ref NP_001230        | proteasome (prosome, macropain)                                                                                                                                                                                                                                        | 1.076 | 1.677 | 1.637 | 1.449 |

|                                  |                                                                                                                                                                                                                                                         |       |       |       |       |
|----------------------------------|---------------------------------------------------------------------------------------------------------------------------------------------------------------------------------------------------------------------------------------------------------|-------|-------|-------|-------|
| 581.1                            | subunit, alpha type [Sus scrofa]                                                                                                                                                                                                                        |       |       |       |       |
| gi 350276134 ref NP_001231877.1  | LETM1 and EF-hand domain-containing protein 1, mitochondrial [Sus scrofa]                                                                                                                                                                               | 0.568 | 0.701 | 0.726 | 0.558 |
| gi 51701269 sp Q95334.1 AMPE_PIG | RecName: Full=Glutamyl aminopeptidase; Short=EAP; AltName: Full=Aminopeptidase A; Short=AP-A; AltName: CD_antigen=CD249 >gi 47522856 ref NP_999182.1  glutamyl aminopeptidase [Sus scrofa] >gi 1518865 gb AAB07141.1  aminopeptidase A [Sus scrofa]     | 0.519 | 0.634 | 0.513 | 0.467 |
| gi 347446687 ref NP_001231527.1  | glucosidase 2 subunit beta precursor [Sus scrofa]                                                                                                                                                                                                       | 0.456 | 0.593 | 0.593 | 0.549 |
| gi 194037005 ref XP_001928988.1  | PREDICTED: ribonuclease UK114-like isoform 1 [Sus scrofa]                                                                                                                                                                                               | 1.117 | 2.581 | 2.299 | 1.141 |
| gi 335281715 ref XP_003122673.2  | PREDICTED: L-asparaginase-like [Sus scrofa]                                                                                                                                                                                                             | 1.844 | 2.26  | 2.082 | 1.32  |
| gi 223046 prf 0410468A           | aminotransferase, Asp                                                                                                                                                                                                                                   | 1.169 | 1.787 | 1.918 | 1.829 |
| gi 113205892 ref NP_001038077.1  | tubulin beta chain [Sus scrofa] >gi 75045190 sp Q767L7.1 TBB5_PIG RecName: Full=Tubulin beta chain; AltName: Full=Tubulin beta-5 chain >gi 81174748 gb ABB58916.1  beta 5-tubulin [Sus scrofa] >gi 41529175 dbj BAD08435.1  beta 5-tubulin [Sus scrofa] | 0.788 | 0.442 | 0.456 | 0.987 |
| gi 335282386 ref XP_003354050.1  | PREDICTED: elongation factor 2 [Sus scrofa]                                                                                                                                                                                                             | 1.833 | 1.1   | 0.974 | 1.955 |
| gi 311254317 ref XP_001927973.2  | PREDICTED: cingulin-like [Sus scrofa]                                                                                                                                                                                                                   | 0.549 | 0.991 | 0.92  | 0.625 |
| gi 219522018 ref NP_001137196.1  | Na(+)/H(+) exchange regulatory cofactor NHE-RF1 [Sus scrofa] >gi 217031226 gb ACJ74160.1  solute carrier family 9 (sodium/hydrogen exchanger) member 3 regulator 1 [Sus scrofa]                                                                         | 1.571 | 2.608 | 2.407 | 1.557 |
| gi 194018702 ref NP_001123419.1  | tropomyosin beta chain [Sus scrofa] >gi 83778524 gb ABC47143.1  beta-tropomyosin [Sus scrofa]                                                                                                                                                           | ---   | ---   | ---   | ---   |
| gi 350595475 ref XP_003360       | PREDICTED: proteasome subunit                                                                                                                                                                                                                           | 0.713 | 2.004 | 2.133 | 1.102 |



|                                  |                                                                                                                                                                                                                                                            |       |       |       |       |
|----------------------------------|------------------------------------------------------------------------------------------------------------------------------------------------------------------------------------------------------------------------------------------------------------|-------|-------|-------|-------|
| 255.2                            | alpha type-2-like [Sus scrofa]                                                                                                                                                                                                                             |       |       |       |       |
| gi 335281298 ref XP_003122400.2  | PREDICTED: tubulin beta-2C chain-like [Sus scrofa]                                                                                                                                                                                                         | ---   | ---   | ---   | ---   |
| gi 330417958 ref NP_001155225.1  | phosphoenolpyruvate carboxykinase [GTP], mitochondrial [Sus scrofa] >gi 238863892 gb ACR66222.1  phosphoenolpyruvate carboxykinase 2 [Sus scrofa]                                                                                                          | 2.689 | 1.25  | 0.996 | 1.532 |
| gi 4033507 sp P08132.2 ANXA4_PIG | RecName: Full=Annexin A4; AltName: Full=35-beta calcimedlin; AltName: Full=Annexin IV; AltName: Full=Annexin-4; AltName: Full=Chromobindin-4; AltName: Full=Endonexin I; AltName: Full=Lipocortin IV; AltName: Full=P32.5; AltName: Full=PP4-X; AltName: F | 0.597 | 0.527 | 0.325 | 0.539 |
| gi 311252000 ref XP_003124873.1  | PREDICTED: fumarylacetoacetate hydrolase domain-containing protein 2-like isoform 2 [Sus scrofa]                                                                                                                                                           | 1.049 | 1.282 | 1.147 | 0.795 |
| gi 194018698 ref NP_001123442.1  | cytochrome c [Sus scrofa] >gi 119388070 sp P62895.2 CYC_PIG RecName: Full=Cytochrome c >gi 62208258 gb AAX77008.1  cytochrome c-like protein [Sus scrofa]                                                                                                  | 1.081 | 2.968 | 2.164 | 1.501 |
| gi 194039882 ref XP_001928584.1  | PREDICTED: histone H2B type 1-H-like [Sus scrofa]                                                                                                                                                                                                          | ---   | ---   | ---   | ---   |
| gi 335291884 ref XP_003356615.1  | PREDICTED: histone H2B type 1-like [Sus scrofa] >gi 194039814 ref XP_001927752.1  PREDICTED: histone H2B type 1-like [Sus scrofa]                                                                                                                          |       |       |       |       |
| gi 335287029 ref XP_003355256.1  | PREDICTED: histone H2B type 2-F-like isoform 1 [Sus scrofa]                                                                                                                                                                                                |       |       |       |       |
| gi 335287031 ref XP_003355257.1  | PREDICTED: histone H2B type 2-F-like isoform 2 [Sus scrofa]                                                                                                                                                                                                |       |       |       |       |
| gi 335291890 ref XP_003356617.1  | PREDICTED: histone H2B type 1-N-like [Sus scrofa]                                                                                                                                                                                                          |       |       |       |       |
| gi 343887370 ref NP_001230585.1  | histone H2B type 1-D [Sus scrofa] >gi 194039822 ref XP_001927974.1  PREDICTED: histone H2B                                                                                                                                                                 |       |       |       |       |

|                                 |                                                                                                                                                                                                                                                           |       |       |       |       |
|---------------------------------|-----------------------------------------------------------------------------------------------------------------------------------------------------------------------------------------------------------------------------------------------------------|-------|-------|-------|-------|
|                                 | type 1-M-like [Sus scrofa]                                                                                                                                                                                                                                |       |       |       |       |
| gi 311259875 ref XP_003128266.1 | PREDICTED: histone H2B type 1-K-like [Sus scrofa]                                                                                                                                                                                                         |       |       |       |       |
| gi 544445 sp P80031.2 GSTP1_PIG | RecName: Full=Glutathione S-transferase P; AltName: Full=GST P1-1; AltName: Full=GST class-pi                                                                                                                                                             | 1.283 | 1.047 | 1.337 | 1.24  |
| gi 1943419 pdb 2GSR B           | Chain B, Structure Of Porcine Class Pi Glutathione S-Transferase >gi 1943418 pdb 2GSR A Chain A, Structure Of Porcine Class Pi Glutathione S-Transferase                                                                                                  |       |       |       |       |
| gi 253577 gb AAB22893.1         | myosin light chain isoform LC17a [swine, aorta smooth muscle, Peptide, 150 aa]                                                                                                                                                                            | 0.258 | 0.611 | 0.537 | 0.407 |
| gi 255683363 ref NP_001157469.1 | myosin light polypeptide 6 [Sus scrofa] >gi 47606435 sp P60662.2 MYL6_PIG RecName: Full=Myosin light polypeptide 6; AltName: Full=17 kDa myosin light chain; Short=LC17; AltName: Full=Myosin light chain 3; Short=MLC-3; AltName: Full=Myosin light chai |       |       |       |       |
| gi 253578 gb AAB22894.1         | myosin light chain isoform LC17b [swine, aorta smooth muscle, Peptide, 150 aa]                                                                                                                                                                            |       |       |       |       |
| gi 335287046 ref XP_003355261.1 | PREDICTED: histone H2B type 1-N-like [Sus scrofa]                                                                                                                                                                                                         | ---   | ---   | ---   | ---   |
| gi 350583430 ref XP_003481516.1 | PREDICTED: histone H2B type 2-E-like [Sus scrofa] >gi 350583421 ref XP_003355262.2  PREDICTED: histone H2B type 2-E-like [Sus scrofa] >gi 350583436 ref XP_003481518.1  PREDICTED: histone H2B type 2-E-like [Sus scrofa] >gi 335287018 ref XP_003355253. |       |       |       |       |
| gi 335310903 ref XP_003123670.2 | PREDICTED: histone H2B type 1-L-like [Sus scrofa]                                                                                                                                                                                                         |       |       |       |       |
| gi 350585077 ref XP_003481871.1 | PREDICTED: hypothetical protein LOC100739300 [Sus scrofa]                                                                                                                                                                                                 | 0.914 | 1.823 | 1.807 | 2.044 |
| gi 350585079 ref XP_003127070.3 | PREDICTED: xaa-Pro dipeptidase [Sus scrofa]                                                                                                                                                                                                               |       |       |       |       |

|                                 |                                                                                                                                                                                                                                                           |       |       |       |       |
|---------------------------------|-----------------------------------------------------------------------------------------------------------------------------------------------------------------------------------------------------------------------------------------------------------|-------|-------|-------|-------|
| gi 281500757 pdb 3FX4 A         | Chain A, Porcine Aldehyde Reductase In Ternary Complex With Inhibitor >gi 229597975 pdb 3H4G A Chain A, Structure Of Aldehyde Reductase Holoenzyme In Complex With Potent Aldose Reductase Inhibitor Fidarestat: Implications For Inhibitor Binding And S | 3.159 | 1.61  | 1.18  | 2.261 |
| gi 114689 sp P13618.1 ATP5J_PIG | RecName: Full=ATP synthase-coupling factor 6, mitochondrial; Short=ATPase subunit F6                                                                                                                                                                      | 0.351 | 0.632 | 0.768 | 0.496 |
| gi 335309281 ref XP_003361573.1 | PREDICTED: ATP synthase-coupling factor 6, mitochondrial-like isoform 1 [Sus scrofa] >gi 335300559 ref XP_003358937.1  PREDICTED: ATP synthase-coupling factor 6, mitochondrial-like [Sus scrofa]                                                         |       |       |       |       |
| gi 335309283 ref XP_003361574.1 | PREDICTED: ATP synthase-coupling factor 6, mitochondrial-like isoform 2 [Sus scrofa]                                                                                                                                                                      |       |       |       |       |
| gi 229001074 emb CAX20316.1     | mannose-6-phosphate receptor binding protein 1 [Sus scrofa]                                                                                                                                                                                               | 1.122 | 1.017 | 0.952 | 1.056 |
| gi 350591696 ref XP_003483317.1 | PREDICTED: sucrase-isomaltase, intestinal-like [Sus scrofa]                                                                                                                                                                                               | 0.913 | 1     | 0.975 | 0.943 |
| gi 148222268 ref NP_001090952.1 | tropomyosin alpha-1 chain [Sus scrofa] >gi 158931149 sp P42639.2 T PM1_PIG RecName: Full=Tropomyosin alpha-1 chain; AltName: Full=Alpha-tropomyosin; AltName: Full=Tropomyosin-1 >gi 117661180 gb ABK55659.1  TPM1 [Sus scrofa]                           | 0.641 | 1.115 | 1.002 | 0.688 |
| gi 54020966 ref NP_001005726.1  | annexin A2 [Sus scrofa] >gi 148876771 sp P19620.4 A NXA2_PIG RecName: Full=Annexin A2; AltName: Full=Annexin II; AltName: Full=Annexin-2; AltName: Full=Calpactin I heavy chain; AltName: Full=Calpactin-1 heavy chain; AltName:                          | 0.905 | 0.473 | 0.453 | 0.667 |

|                                 |                                                                                                                                                                                                                                                            |       |       |       |       |
|---------------------------------|------------------------------------------------------------------------------------------------------------------------------------------------------------------------------------------------------------------------------------------------------------|-------|-------|-------|-------|
|                                 | Full=Chromobindin-8; AltN                                                                                                                                                                                                                                  |       |       |       |       |
| gi 350587379 ref XP_003482398.1 | PREDICTED: putative aminopeptidase C13A11.05-like [Sus scrofa]                                                                                                                                                                                             | 2.105 | 2.722 | 3.623 | 0.835 |
| gi 1710093 sp P50121.2 RET2_PIG | RecName: Full=Retinol-binding protein 2; AltName: Full=Cellular retinol-binding protein II; Short=CRBP-II >gi 55741711 ref NP_999616.1  retinol-binding protein 2 [Sus scrofa] >gi 455523 emb CAA54729.1  cellular retinol binding protein II [Sus scrofa] | 1.386 | 0.766 | 0.8   | 0.777 |
| gi 335284397 ref XP_003354597.1 | PREDICTED: major vault protein isoform 1 [Sus scrofa]                                                                                                                                                                                                      | 1.404 | 1.073 | 1.002 | 1.37  |
| gi 335305925 ref XP_003135119.2 | PREDICTED: LOW QUALITY PROTEIN: ubiquitin-like modifier activating enzyme 1 [Sus scrofa]                                                                                                                                                                   | 1.971 | 0.991 | 0.967 | 1.697 |
| gi 51592135 ref NP_001004043.1  | cofilin-1 [Sus scrofa] >gi 116850 sp P10668.3 COF1_PIG RecName: Full=Cofilin-1; AltName: Full=Cofilin, non-muscle isoform >gi 164425 gb AAA31020.1  cofilin [Sus scrofa]                                                                                   | 1.814 | 1.452 | 0.952 | 1.469 |
| gi 340007404 ref NP_001229990.1 | alpha-actinin-1 [Sus scrofa]                                                                                                                                                                                                                               | 1.027 | 0.914 | 0.831 | 0.877 |
| gi 311251248 ref XP_003124516.1 | PREDICTED: apoptosis-associated speck-like protein containing a CARD-like isoform 1 [Sus scrofa]                                                                                                                                                           | 3.139 | 6.012 | 6.925 | 3.814 |
| gi 335284318 ref XP_003354571.1 | PREDICTED: apoptosis-associated speck-like protein containing a CARD-like isoform 2 [Sus scrofa]                                                                                                                                                           |       |       |       |       |
| gi 335299026 ref XP_003132223.2 | PREDICTED: microtubule-associated protein 4-like [Sus scrofa]                                                                                                                                                                                              | 0.901 | 1.857 | 1.532 | 1.377 |
| gi 350583970 ref XP_003126216.3 | PREDICTED: keratin, type II cytoskeletal 75-like [Sus scrofa]                                                                                                                                                                                              | 0.448 | 0.68  | 0.76  | 0.546 |
| gi 51317314 sp P62802.2 H4_PIG  | RecName: Full=Histone H4 >gi 350583428 ref XP_003481515.1  PREDICTED: histone H4-like [Sus scrofa] >gi 335291880 ref XP_003356614.1  PREDICTED: histone H4-like [Sus                                                                                       | 0.435 | 0.532 | 0.445 | 0.417 |

|                                    |                                                                                                                                                                                                                                                          |       |       |       |       |
|------------------------------------|----------------------------------------------------------------------------------------------------------------------------------------------------------------------------------------------------------------------------------------------------------|-------|-------|-------|-------|
|                                    | scrofa] >gi 335287016 ref XP_003355252.1  PREDICTED: histone H4-like [Sus scrofa] >g                                                                                                                                                                     |       |       |       |       |
| gi 218664491 ref NP_001136314.1    | galactin-3 [Sus scrofa] >gi 215254098 gb ACJ64061.1  lectin galactoside-binding soluble 2 protein [Sus scrofa]                                                                                                                                           | 1.047 | 1.249 | 0.849 | 0.939 |
| gi 346986388 ref NP_001231345.1    | profilin-1 [Sus scrofa]                                                                                                                                                                                                                                  | 2.107 | 1.375 | 1.305 | 2.004 |
| gi 112976 sp P00503.3 AATC_PIG     | RecName: Full=Aspartate aminotransferase, cytoplasmic; AltName: Full=Glutamate oxaloacetate transaminase 1; AltName: Full=Transaminase A >gi 47522636 ref NP_999092.1  aspartate aminotransferase, cytoplasmic [Sus scrofa] >gi 300557343 emb CBV09643.1 | 1.113 | 2.697 | 3.518 | 2.144 |
| gi 350584176 ref XP_003481686.1    | PREDICTED: myosin-Ia-like [Sus scrofa]                                                                                                                                                                                                                   | 0.968 | 0.862 | 0.644 | 1.164 |
| gi 350582932 ref XP_003125549.2    | PREDICTED: annexin A13 isoform 2 [Sus scrofa]                                                                                                                                                                                                            | 0.38  | 0.322 | 0.384 | 0.386 |
| gi 350585375 ref XP_003127408.3    | PREDICTED: myosin-14 [Sus scrofa]                                                                                                                                                                                                                        | 0.739 | 0.612 | 0.67  | 0.696 |
| gi 347300325 ref NP_001231461.1    | dehydrogenase/reductase SDR family member 11 [Sus scrofa]                                                                                                                                                                                                | 2.52  | 1.354 | 1.392 | 1.907 |
| gi 335281609 ref XP_003353842.1    | PREDICTED: stress-induced-phosphoprotein 1-like [Sus scrofa]                                                                                                                                                                                             | 1.48  | 1.786 | 1.834 | 1.491 |
| gi 194044822 ref XP_001927404.1    | PREDICTED: peroxiredoxin-4 [Sus scrofa]                                                                                                                                                                                                                  | 0.45  | 1.472 | 1.707 | 1.213 |
| gi 311252459 ref XP_003125105.1    | PREDICTED: poly(rC)-binding protein 1-like [Sus scrofa]                                                                                                                                                                                                  | 1.293 | 1.231 | 1.286 | 1.261 |
| gi 290463427 sp Q0QF01.2 D_HSA_PIG | RecName: Full=Succinate dehydrogenase [ubiquinone] flavoprotein subunit, mitochondrial; AltName: Full=Flavoprotein subunit of complex II; Short=Fp; Flags: Precursor                                                                                     | 0.678 | 0.605 | 0.674 | 0.695 |
| gi 322812294 pdb 3AE8 A            | Chain A, Crystal Structure Of Porcine Heart Mitochondrial Complex Ii Bound With                                                                                                                                                                          |       |       |       |       |

|                                   |                                                                                                                                                                                                                                                           |       |       |       |       |
|-----------------------------------|-----------------------------------------------------------------------------------------------------------------------------------------------------------------------------------------------------------------------------------------------------------|-------|-------|-------|-------|
|                                   | N-(3-Isopropoxy-Phenyl)-2-Trifluoromethylbenzamide >gi 345531796 pdb 3SFE A Chain A, Crystal Structure Of Porcine Mitochondrial Respiratory Complex Ii Bound With Oxaloac                                                                                 |       |       |       |       |
| gi 47523768 ref NP_999520.1       | epoxide hydrolase 1 precursor [Sus scrofa] >gi 75069447 sp P79381.1 HY EP_PIG RecName: Full=Epoxide hydrolase 1; AltName: Full=Epoxide hydratase; AltName: Full=Microsomal epoxide hydrolase >gi 1840391 dbj BAA1920.0.1  epoxide hydrolase [Sus scrofa]  | 0.733 | 0.492 | 0.311 | 0.608 |
| gi 194037042 ref XP_001927136.1   | PREDICTED: cadherin-17 [Sus scrofa]                                                                                                                                                                                                                       | 0.516 | 0.558 | 0.827 | 0.472 |
| gi 350593820 ref XP_003483769.1   | PREDICTED: isocitrate dehydrogenase [NADP] cytoplasmic isoform 3 [Sus scrofa] >gi 350593816 ref XP_003483767.1  PREDICTED: isocitrate dehydrogenase [NADP] cytoplasmic isoform 1 [Sus scrofa] >gi 350593818 ref XP_003483768.1  PREDICTED: isocitrate deh | 2.425 | 1.236 | 1.05  | 1.383 |
| gi 350583022 ref XP_001927263.3   | PREDICTED: 14-3-3 protein zeta/delta [Sus scrofa]                                                                                                                                                                                                         | 3.308 | 1.517 | 1.086 | 2.726 |
| gi 3913046 sp O46409.1 APO A4_PIG | RecName: Full=Apolipoprotein A-IV; Short=Apo-AIV; Short=ApoA-IV; AltName: Full=Apolipoprotein A4; Flags: Precursor >gi 47523830 ref NP_999553.1  apolipoprotein A-IV precursor [Sus scrofa] >gi 2695742 emb CAA11020.1  apolipoprotein A-IV [Sus scrofa]  | 0.558 | 0.39  | 0.478 | 0.451 |
| gi 350585075 ref XP_003481870.1   | PREDICTED: xaa-Pro dipeptidase-like [Sus scrofa]                                                                                                                                                                                                          | 1.176 | 1.013 | 1.704 | 1.131 |
| gi 146741296 dbj BAF62303.1       | keratin 1 [Sus scrofa]                                                                                                                                                                                                                                    | 0.933 | 1.375 | 0.846 | 0.856 |
| gi 350583977 ref XP_003481635.1   | PREDICTED: keratin, type II cytoskeletal 1 [Sus scrofa]                                                                                                                                                                                                   |       |       |       |       |
| gi 311255413 ref XP_001927240.2   | PREDICTED: keratin, type II cytoskeletal 79 [Sus scrofa]                                                                                                                                                                                                  | 0.422 | 0.675 | 0.754 | 0.534 |

|                                   |                                                                                                                                                                                                                                                            |       |       |       |       |
|-----------------------------------|------------------------------------------------------------------------------------------------------------------------------------------------------------------------------------------------------------------------------------------------------------|-------|-------|-------|-------|
| gi 83921635 ref NP_001033089.1    | FKBP1A-like [Sus scrofa] >gi 61098747 gb AAX37547.1  FKBP1A-like [Sus scrofa]                                                                                                                                                                              | 1.011 | 1.849 | 1.72  | 1.154 |
| gi 112985 sp P00506.2 AATM_PIG    | RecName: Full=Aspartate aminotransferase, mitochondrial; Short=mAspAT; AltName: Full=Fatty acid-binding protein; Short=FABP-1; AltName: Full=Glutamate oxaloacetate transaminase 2; AltName: Full=Plasma membrane-associated fatty acid-binding protein;   | 1.009 | 1.728 | 2.191 | 1.62  |
| gi 347658971 ref NP_001231613.1   | ATP synthase, H <sup>+</sup> transporting, mitochondrial Fo complex, subunit d [Sus scrofa]                                                                                                                                                                | 0.489 | 0.543 | 0.446 | 0.473 |
| gi 311250151 ref XP_003123979.1   | PREDICTED: heat shock 70 kDa protein 4 [Sus scrofa]                                                                                                                                                                                                        | 1.453 | 2.216 | 1.688 | 1.224 |
| gi 55583761 sp Q64L94.1 PSME1_PIG | RecName: Full=Proteasome activator complex subunit 1; AltName: Full=Proteasome activator 28 subunit alpha; Short=PA28a; Short=PA28alpha >gi 34978646 gb AAQ83574.1  proteasome activator 28 alpha subunit [Sus scrofa]                                     | 1.531 | 1.257 | 1.253 | 1.363 |
| gi 350592528 ref XP_003483480.1   | PREDICTED: endoplasmic reticulum resident protein 29 [Sus scrofa]                                                                                                                                                                                          | 0.787 | 1.304 | 1.172 | 0.982 |
| gi 118403904 ref NP_001072131.1   | protein DJ-1 [Sus scrofa] >gi 67038668 gb AAY63803.1  DJ-1 protein [Sus scrofa]                                                                                                                                                                            | 1.06  | 2.156 | 1.948 | 1.543 |
| gi 113205888 ref NP_001038076.1   | aldehyde dehydrogenase, mitochondrial precursor [Sus scrofa] >gi 122138098 sp Q2XQV4.1  ALDH2_PIG RecName: Full=Aldehyde dehydrogenase, mitochondrial; AltName: Full=ALDH class 2; AltName: Full=ALDH-E2; Flags: Precursor >gi 81295909 gb ABB70228.1  mit | 1.732 | 0.778 | 0.734 | 1.475 |
| gi 187370719 gb ACD02422.1        | mitochondrial aldehyde dehydrogenase 2 [Sus scrofa]                                                                                                                                                                                                        |       |       |       |       |
| gi 350584145 ref XP_001929467.3   | PREDICTED: nascent polypeptide-associated complex                                                                                                                                                                                                          | 0.879 | 1.852 | 1.608 | 1.283 |

|                                   |                                                                                                                                                                                                                                                           |       |       |       |       |
|-----------------------------------|-----------------------------------------------------------------------------------------------------------------------------------------------------------------------------------------------------------------------------------------------------------|-------|-------|-------|-------|
|                                   | subunit alpha isoform 1 [Sus scrofa]                                                                                                                                                                                                                      |       |       |       |       |
| gi 350584147 ref XP_003481679.1   | PREDICTED: nascent polypeptide-associated complex subunit alpha [Sus scrofa]                                                                                                                                                                              |       |       |       |       |
| gi 350594035 ref XP_003483822.1   | PREDICTED: UDP-glucuronosyltransferase 1-10 isoform 3 [Sus scrofa]                                                                                                                                                                                        | 0.561 | 0.348 | 0.404 | 0.378 |
| gi 213958609 gb ACJ54701.1        | glutamine:fructose-6-phosphate amidotransferase 1 variant 2 [Sus scrofa]                                                                                                                                                                                  | 1.388 | 0.576 | 0.609 | 1.45  |
| gi 303228252 ref NP_001181908.1   | glucosamine--fructose-6-phosphate aminotransferase [isomerizing] 1 [Sus scrofa] >gi 213958607 gb ACJ54700.1  glutamine:fructose-6-phosphate amidotransferase 1 variant 1 [Sus scrofa]                                                                     |       |       |       |       |
| gi 75051712 sp Q9TUB5.1 CLCA1_PIG | RecName: Full=Calcium-activated chloride channel regulator 1; AltName: Full=Calcium-activated chloride channel family member 1; AltName: Full=pCLCA1; Flags: Precursor >gi 47523388 ref NP_999313.1  calcium-activated chloride channel regulator 1 precu | 1.042 | 1.503 | 1.076 | 1.117 |
| gi 162951821 ref NP_001106165.1   | heterogeneous nuclear ribonucleoprotein A/B [Sus scrofa] >gi 160858224 dbj BAF93845.1  CArG-binding factor A [Sus scrofa]                                                                                                                                 | 0.998 | 2.227 | 1.941 | 1.736 |
| gi 350276234 ref NP_001231897.1   | anterior gradient protein 2 homolog precursor [Sus scrofa]                                                                                                                                                                                                | 1.123 | 1.229 | 1.016 | 1.215 |
| gi 1364248 emb CAA82246.1         | glucosephosphate isomerase [Sus scrofa]                                                                                                                                                                                                                   | 2.652 | 1.874 | 1.372 | 2.71  |
| gi 21730305 pdb 1GZD A            | Chain A, Crystal Structure Of Pig Phosphoglucose Isomerase >gi 24987288 pdb 1GZV A Chain A, The Crystal Structure Of Phosphoglucose Isomerase From Pig Muscle Complexed With 5-Phosphoarabinonate                                                         |       |       |       |       |
| gi 47523720 ref NP_999495.1       | glucose-6-phosphate isomerase [Sus scrofa] >gi 120742 sp P08059.3 G6PI_PIG RecName:                                                                                                                                                                       |       |       |       |       |



|                                 |                                                                                                                                                                                                                      |       |       |       |       |
|---------------------------------|----------------------------------------------------------------------------------------------------------------------------------------------------------------------------------------------------------------------|-------|-------|-------|-------|
|                                 | Full=Glucose-6-phosphate isomerase;<br>Short=GPI; AltName: Full=Autocrine motility factor; Short=AMF;<br>AltName: Full=Neuroleukin;<br>Short=NLK; AltName:<br>Full=Phosphoglucose                                    |       |       |       |       |
| gi 350593430 ref XP_003483683.1 | PREDICTED: glutathione reductase, mitochondrial isoform 1 [Sus scrofa]                                                                                                                                               | 0.713 | 1.184 | 1.473 | 1.349 |
| gi 350580243 ref XP_003123005.3 | PREDICTED: harmonin-like [Sus scrofa]                                                                                                                                                                                | 0.886 | 2.1   | 1.767 | 1.414 |
| gi 194039884 ref XP_001928592.1 | PREDICTED: histone H2A type 1-like [Sus scrofa]                                                                                                                                                                      | 0.354 | 0.344 | 0.267 | 0.246 |
| gi 335291888 ref XP_001928674.3 | PREDICTED: histone H2A type 1-F-like [Sus scrofa]                                                                                                                                                                    |       |       |       |       |
| gi 335291892 ref XP_003356618.1 | PREDICTED: histone H2A type 1-like [Sus scrofa] >gi 311259877 ref XP_003128263.1  PREDICTED: histone H2A type 1-like [Sus scrofa] >gi 194039812 ref XP_001927727.1  PREDICTED: histone H2A type 1-like [Sus scrofa]  |       |       |       |       |
| gi 335291882 ref XP_001928646.3 | PREDICTED: histone H2A type 1-F-like [Sus scrofa]                                                                                                                                                                    |       |       |       |       |
| gi 335308465 ref XP_003361239.1 | PREDICTED: histone H2A type 1-like [Sus scrofa] >gi 194039816 ref XP_001927762.1  PREDICTED: histone H2A type 1-like [Sus scrofa]                                                                                    |       |       |       |       |
| gi 350583438 ref XP_003481519.1 | PREDICTED: histone H2A type 2-C-like [Sus scrofa]                                                                                                                                                                    |       |       |       |       |
| gi 350583432 ref XP_003355263.2 | PREDICTED: histone H2A type 2-A-like [Sus scrofa]                                                                                                                                                                    |       |       |       |       |
| gi 47523692 ref NP_999478.1     | thioredoxin [Sus scrofa] >gi 20141821 sp P82460.3 THIO_PIG RecName: Full=Thioredoxin; Short=Trx >gi 332368598 gb AEE61373.1  thioredoxin [Sus scrofa] >gi 14326453 gb AAK60272.1 AF382821_1 thioredoxin [Sus scrofa] | 1.007 | 2.615 | 2.229 | 1.258 |
| gi 281427374 ref NP_001163991.1 | T-complex protein 1 subunit beta [Sus                                                                                                                                                                                | 1.265 | 0.945 | 0.666 | 1.224 |

|                                   |                                                                                                                                                                                                                                                            |       |       |       |       |
|-----------------------------------|------------------------------------------------------------------------------------------------------------------------------------------------------------------------------------------------------------------------------------------------------------|-------|-------|-------|-------|
|                                   | scrofa] >gi 262036935 dbj BAI47602.1  chaperonin containing TCP1, subunit 2 (beta) [Sus scrofa]                                                                                                                                                            |       |       |       |       |
| gi 350596362 ref XP_003361090.2   | PREDICTED: CD2-associated protein-like [Sus scrofa]                                                                                                                                                                                                        | 1.357 | 5.83  | 3.915 | 2.031 |
| gi 222136590 ref NP_001138373.1   | proteasome subunit alpha type-5 [Sus scrofa]                                                                                                                                                                                                               | 1.041 | 2.413 | 2.229 | 1.879 |
| gi 335285948 ref XP_003131991.2   | PREDICTED: very long-chain specific acyl-CoA dehydrogenase, mitochondrial-like isoform 1 [Sus scrofa]                                                                                                                                                      | 1.314 | 0.725 | 0.661 | 0.646 |
| gi 335285950 ref XP_003354989.1   | PREDICTED: very long-chain specific acyl-CoA dehydrogenase, mitochondrial-like isoform 2 [Sus scrofa]                                                                                                                                                      |       |       |       |       |
| gi 2500586 sp Q29099.1 PTB P1_PIG | RecName: Full=Polypyrimidine tract-binding protein 1; Short=PTB; AltName: Full=Heterogeneous nuclear ribonucleoprotein I; Short=hnRNP I >gi 47523538 ref NP_999396.1  polypyrimidine tract-binding protein 1 [Sus scrofa] >gi 1122433 emb CAA63597.1  pol  | 1.078 | 2.503 | 2.591 | 3.405 |
| gi 350592201 ref XP_003359029.2   | PREDICTED: hypothetical protein LOC100620809 isoform 1, partial [Sus scrofa]                                                                                                                                                                               | 0.604 | 0.664 | 0.798 | 0.503 |
| gi 335305558 ref XP_003134901.2   | PREDICTED: heterogeneous nuclear ribonucleoproteins A2/B1 isoform 1 [Sus scrofa]                                                                                                                                                                           | 1.127 | 0.765 | 0.745 | 1.284 |
| gi 346986324 ref NP_001231316.1   | tumor protein D52 [Sus scrofa]                                                                                                                                                                                                                             | 0.72  | 0.882 | 1.075 | 1.124 |
| gi 47522692 ref NP_999062.1       | long-chain specific acyl-CoA dehydrogenase, mitochondrial precursor [Sus scrofa] >gi 2829676 sp P79274.1 AC ADL_PIG RecName: Full=Long-chain specific acyl-CoA dehydrogenase, mitochondrial; Short=LCAD; Flags: Precursor >gi 1695729 dbj BAA13965.1  long | 0.734 | 0.971 | 0.828 | 0.632 |

|                                 |                                                                                                                                                                                                                                                            |       |       |       |       |
|---------------------------------|------------------------------------------------------------------------------------------------------------------------------------------------------------------------------------------------------------------------------------------------------------|-------|-------|-------|-------|
| gi 148747594 ref NP_001092068.1 | 60S acidic ribosomal protein P0 [Sus scrofa] >gi 182705234 sp Q29214.2 RLA0_PIG RecName: Full=60S acidic ribosomal protein P0; AltName: Full=60S ribosomal protein L10E >gi 83854099 gb ABC47963.1  ribosomal phosphoprotein large PO subunit [Sus scrofa] | 0.785 | 0.612 | 0.651 | 0.807 |
| gi 297591965 ref NP_001172061.1 | leukotriene A-4 hydrolase [Sus scrofa] >gi 262204898 dbj BAI48029.1  leukotriene A4 hydrolase [Sus scrofa]                                                                                                                                                 | 1.816 | 0.956 | 0.872 | 1.682 |
| gi 303304923 dbj BAJ14788.1     | aminopeptidase T [Sus scrofa]                                                                                                                                                                                                                              |       |       |       |       |
| gi 350586352 ref XP_003482167.1 | PREDICTED: serpin peptidase inhibitor, clade B (ovalbumin), member 1 [Sus scrofa]                                                                                                                                                                          | 1.608 | 0.798 | 0.757 | 1.136 |
| gi 194033860 ref XP_001927901.1 | PREDICTED: UV excision repair protein RAD23 homolog B [Sus scrofa]                                                                                                                                                                                         | 1.642 | 2.407 | 2.937 | 1.236 |
| gi 347300165 ref NP_001231397.1 | proteasome subunit alpha type-4 [Sus scrofa]                                                                                                                                                                                                               | 0.938 | 1.904 | 1.898 | 1.546 |
| gi 299611 gb AAB26236.1         | cerebroside sulfate activator, CS-Act [swine, kidneys, Peptide, 79 aa]                                                                                                                                                                                     | 0.957 | 0.947 | 1.163 | 0.607 |
| gi 17380295 sp P81405.2 SAP_PIG | RecName: Full=Saposin-B-Val; Contains: RecName: Full=Saposin-B; AltName: Full=Cerebroside sulfate activator; Short=CS-ACT; AltName: Full=Non-specific activator; AltName: Full=Sphingolipid activator protein 1; Short=SAP-1                               |       |       |       |       |
| gi 311246990 ref XP_003122442.1 | PREDICTED: mucin-2, partial [Sus scrofa]                                                                                                                                                                                                                   | 1.835 | 0.865 | 0.677 | 1.098 |
| gi 222136592 ref NP_001138374.1 | proteasome subunit beta type-3 [Sus scrofa]                                                                                                                                                                                                                | 1.162 | 1.55  | 1.872 | 1.409 |
| gi 68532157 gb AAAY98813.1      | proteasome subunit 10 [Sus scrofa] >gi 68532159 gb AAAY98814.1  proteasome subunit 10 [Sus scrofa]                                                                                                                                                         | 1.961 | 1.767 | 3.009 | 1.305 |
| gi 113205704 ref NP_001038030.1 | proteasome subunit beta type-10 [Sus scrofa] >gi 90823108 gb ABE01081.1  proteasome beta 10 subunit [Sus scrofa]                                                                                                                                           |       |       |       |       |
| gi 194042318 ref XP_001928      | PREDICTED: putative hexokinase                                                                                                                                                                                                                             | 0.716 | 0.557 | 0.679 | 0.825 |

|                                 |                                                                                                                                                                                                                                                           |       |       |       |       |
|---------------------------------|-----------------------------------------------------------------------------------------------------------------------------------------------------------------------------------------------------------------------------------------------------------|-------|-------|-------|-------|
| 917.1                           | HKDC1 [Sus scrofa]                                                                                                                                                                                                                                        |       |       |       |       |
| gi 350583750 ref XP_003481579.1 | PREDICTED: hsc70-interacting protein-like isoform 1 [Sus scrofa]                                                                                                                                                                                          | 1.648 | 1.355 | 1.322 | 1.35  |
| gi 350583752 ref XP_003481580.1 | PREDICTED: hsc70-interacting protein-like isoform 2 [Sus scrofa]                                                                                                                                                                                          |       |       |       |       |
| gi 47523764 ref NP_999518.1     | peptidyl-prolyl cis-trans isomerase A [Sus scrofa] >gi 51702768 sp P62936.2 PPIA_PIG RecName: Full=Peptidyl-prolyl cis-trans isomerase A; Short=PPIase A; AltName: Full=Cyclophilin A; AltName: Full=Cyclosporin A-binding protein; AltName: Full=Rotamas | 2.721 | 1.273 | 0.985 | 2.422 |
| gi 350589126 ref XP_003482792.1 | PREDICTED: nucleoprotein TPR [Sus scrofa]                                                                                                                                                                                                                 | 0.863 | 0.852 | 0.757 | 0.883 |
| gi 350586779 ref XP_003482273.1 | PREDICTED: LOW QUALITY PROTEIN: IQ motif containing GTPase activating protein 1 [Sus scrofa]                                                                                                                                                              | 1.126 | 0.971 | 0.793 | 1.146 |
| gi 311244872 ref XP_003121596.1 | PREDICTED: creatine kinase U-type, mitochondrial-like isoform 2 [Sus scrofa] >gi 311244870 ref XP_003121595.1  PREDICTED: creatine kinase U-type, mitochondrial-like isoform 1 [Sus scrofa]                                                               | 1.676 | 1.552 | 1.153 | 1.306 |
| gi 343791015 ref NP_001230554.1 | carboxylesterase 3 precursor [Sus scrofa]                                                                                                                                                                                                                 | 0.942 | 0.662 | 0.829 | 0.924 |
| gi 194040624 ref XP_001929173.1 | PREDICTED: plastin-2 isoform 1 [Sus scrofa]                                                                                                                                                                                                               | 1.786 | 1.252 | 1.164 | 1.583 |
| gi 162952052 ref NP_001106151.1 | transketolase [Sus scrofa] >gi 159502444 gb ABW97521.1  transketolase [Sus scrofa]                                                                                                                                                                        | 1.819 | 2.627 | 3.235 | 3.514 |
| gi 311272935 ref XP_003133651.1 | PREDICTED: NADH-ubiquinone oxidoreductase 75 kDa subunit, mitochondrial isoform 1 [Sus scrofa]                                                                                                                                                            | 0.699 | 0.592 | 0.38  | 0.592 |
| gi 335303281 ref XP_003359671.1 | PREDICTED: NADH-ubiquinone oxidoreductase 75 kDa subunit, mitochondrial isoform 2 [Sus scrofa]                                                                                                                                                            |       |       |       |       |
| gi 335302040 ref XP_001927564.2 | PREDICTED: delta-1-pyrroline-5-carboxylate synthase isoform 1 [Sus scrofa]                                                                                                                                                                                | 0.834 | 0.466 | 0.373 | 0.665 |

|                                  |                                                                                                                                                                                                                                                            |       |       |       |       |
|----------------------------------|------------------------------------------------------------------------------------------------------------------------------------------------------------------------------------------------------------------------------------------------------------|-------|-------|-------|-------|
| gi 346644799 ref NP_001231157.1  | thymopoietin [Sus scrofa]                                                                                                                                                                                                                                  | 0.723 | 0.984 | 0.854 | 0.716 |
| gi 311252403 ref XP_003125080.1  | PREDICTED: sepiapterin reductase-like [Sus scrofa]                                                                                                                                                                                                         | 1.394 | 1.35  | 1.971 | 1.837 |
| gi 1170740 sp P00339.3 LDH A_PIG | RecName: Full=L-lactate dehydrogenase A chain; Short=LDH-A; AltName: Full=LDH muscle subunit; Short=LDH-M >gi 473571 gb AAA50436.1  lactate dehydrogenase-A [Sus scrofa domesticus]                                                                        | 1.799 | 0.825 | 0.705 | 1.44  |
| gi 48675953 ref NP_001001643.1   | rab GDP dissociation inhibitor beta [Sus scrofa] >gi 75043802 sp Q6Q7J2.1 G DIB_PIG RecName: Full=Rab GDP dissociation inhibitor beta; Short=Rab GDI beta; AltName: Full=Guanosine diphosphate dissociation inhibitor 2; Short=GDI-2 >gi 45758488 gb AAS76 | 2.866 | 1.102 | 0.916 | 1.781 |
| gi 335297609 ref XP_003358079.1  | PREDICTED: synaptic vesicle membrane protein VAT-1 homolog [Sus scrofa]                                                                                                                                                                                    | 0.788 | 0.386 | 0.515 | 0.459 |
| gi 350578484 ref XP_003121491.3  | PREDICTED: NAD-dependent malic enzyme, mitochondrial [Sus scrofa]                                                                                                                                                                                          | 1.031 | 0.947 | 1.075 | 1.163 |
| gi 345441771 ref NP_001230857.1  | aldolase C, fructose-bisphosphate [Sus scrofa]                                                                                                                                                                                                             | 1.123 | 0.698 | 1.148 | 0.868 |
| gi 71042645 pdb 2BKI A           | Chain A, Myosin Vi Nucleotide-Free (Mdinsert2-Iq) Crystal Structure                                                                                                                                                                                        | ---   | ---   | ---   | ---   |
| gi 320089676 pdb 2X51 A          | Chain A, M6 Delta Insert1                                                                                                                                                                                                                                  |       |       |       |       |
| gi 73536335 pdb 2BKH A           | Chain A, Myosin Vi Nucleotide-Free (Mdinsert2) Crystal Structure                                                                                                                                                                                           |       |       |       |       |
| gi 162330177 pdb 2VAS A          | Chain A, Myosin Vi (Md-Insert2-Cam, Delta-Insert1) Post-Rigor State >gi 162330179 pdb 2VB6 A                                                                                                                                                               |       |       |       |       |
| gi 160877818 pdb 2V26 A          | Chain A, Myosin Vi (Md) Pre-Powerstroke State (Mg.Adp.Vo4)                                                                                                                                                                                                 |       |       |       |       |
| gi 313754272 pdb 3L9I A          | Chain A, Myosin Vi Nucleotide-Free (Mdinsert2) L310g Mutant Crystal                                                                                                                                                                                        |       |       |       |       |

|                                    | Structure                                                                                                                                                                                                                                                  |       |       |       |       |
|------------------------------------|------------------------------------------------------------------------------------------------------------------------------------------------------------------------------------------------------------------------------------------------------------|-------|-------|-------|-------|
| gi 122064583 sp P04178.2 SO DC_PIG | RecName: Full=Superoxide dismutase [Cu-Zn] >gi 298677090 ref NP_001177351.1  superoxide dismutase [Cu-Zn] [Sus scrofa] >gi 297593564 gb ADI47520.1  superoxide dismutase 1 [Sus scrofa]                                                                    | 0.935 | 1.54  | 1.45  | 1.125 |
| gi 350589456 ref XP_003357762.2    | PREDICTED: ubiquilin-1 [Sus scrofa]                                                                                                                                                                                                                        | 0.873 | 1.238 | 1.248 | 1.101 |
| gi 47523420 ref NP_999331.1        | trans-1,2-dihydrobenzene-1,2-diol dehydrogenase [Sus scrofa] >gi 75051805 sp Q9TV69.1 D HDH_PIG RecName: Full=Trans-1,2-dihydrobenzene-1,2-diol dehydrogenase; AltName: Full=D-xylose 1-dehydrogenase; AltName: Full=D-xylose-NADP dehydrogenase; AltName: | 1.382 | 1.448 | 1.126 | 1.422 |
| gi 47522608 ref NP_999106.1        | dolichyl-diphosphooligosaccharide--protein glycosyltransferase subunit 2 precursor [Sus scrofa] >gi 75056105 sp Q9GL01.1 R PN2_PIG RecName: Full=Dolichyl-diphosphooligosaccharide--protein glycosyltransferase subunit 2; AltName: Full=Dolichyl-diphosph | 0.966 | 0.55  | 0.412 | 0.788 |
| gi 350589336 ref XP_003130615.3    | PREDICTED: heterogeneous nuclear ribonucleoprotein U [Sus scrofa]                                                                                                                                                                                          | 0.796 | 1.037 | 0.907 | 0.885 |
| gi 380509273 gb AFD64639.1         | peroxisomal acyl-coenzyme A oxidase 1 isoform 1 [Sus scrofa]                                                                                                                                                                                               | 1.069 | 0.86  | 1.61  | 0.514 |
| gi 380509275 gb AFD64640.1         | peroxisomal acyl-coenzyme A oxidase 1 isoform 2 [Sus scrofa]                                                                                                                                                                                               |       |       |       |       |
| gi 350592730 ref XP_003483523.1    | PREDICTED: heterogeneous nuclear ribonucleoprotein F [Sus scrofa] >gi 335301642 ref XP_003359253.1  PREDICTED: heterogeneous nuclear ribonucleoprotein F [Sus scrofa] >gi 194042674 ref XP_001929089.1  PREDICTED: heterogeneous nuclear ribonucleoprotei  | 1.215 | 1.29  | 1.078 | 1.133 |

|                                  |                                                                                                                                                                                                                                                           |       |       |       |       |
|----------------------------------|-----------------------------------------------------------------------------------------------------------------------------------------------------------------------------------------------------------------------------------------------------------|-------|-------|-------|-------|
| gi 311254039 ref XP_003125724.1  | PREDICTED: mucosal pentraxin-like [Sus scrofa]                                                                                                                                                                                                            | 0.42  | 0.286 | 0.227 | 0.291 |
| gi 311248177 ref XP_003123013.1  | PREDICTED: proteasome subunit alpha type-1-like [Sus scrofa]                                                                                                                                                                                              | 0.627 | 1.485 | 1.428 | 1.467 |
| gi 347300163 ref NP_001231396.1  | succinate-semialdehyde dehydrogenase, mitochondrial [Sus scrofa]                                                                                                                                                                                          | 1.038 | 0.391 | 0.419 | 0.599 |
| gi 347300243 ref NP_001231430.1  | glutamate dehydrogenase 1, mitochondrial [Sus scrofa]                                                                                                                                                                                                     | 0.826 | 0.563 | 0.527 | 0.727 |
| gi 335309939 ref XP_003133770.2  | PREDICTED: nucleolin-like [Sus scrofa]                                                                                                                                                                                                                    | 1.089 | 1.648 | 1.607 | 1.599 |
| gi 283993079 gb ADB57036.1       | L-gulonate 3-dehydrogenase [Sus scrofa]                                                                                                                                                                                                                   | 2.065 | 0.888 | 1.278 | 1.51  |
| gi 350582175 ref XP_003481218.1  | PREDICTED: mitochondrial inner membrane protein, partial [Sus scrofa]                                                                                                                                                                                     | 0.546 | 0.513 | 0.778 | 0.61  |
| gi 1702996 sp P54612.2 2AA A_PIG | RecName: Full=Serine/threonine-protein phosphatase 2A 65 kDa regulatory subunit A alpha isoform; AltName: Full=PP2A subunit A isoform PR65-alpha; AltName: Full=PP2A subunit A isoform R1-alpha >gi 47522870 ref NP_999189.1  serine/threonine-protein ph | 2.623 | 1.146 | 1.059 | 2.451 |
| gi 311270597 ref XP_003132922.1  | PREDICTED: 26S proteasome non-ATPase regulatory subunit 9-like [Sus scrofa]                                                                                                                                                                               | 0.599 | 1.217 | 1.425 | 0.755 |
| gi 47169449 pdb 1VJD A           | Chain A, Structure Of Pig Muscle Pkg Complexed With Atp >gi 47169448 pdb 1VJC A Chain A, Structure Of Pig Muscle Pkg Complexed With Mgatp                                                                                                                 | 1.879 | 0.606 | 0.764 | 1.515 |
| gi 153792027 ref NP_001093402.1  | phosphoglycerate kinase 1 [Sus scrofa] >gi 56757507 sp Q7SIB7.3 P GK1_PIG RecName: Full=Phosphoglycerate kinase 1 >gi 50513041 gb AAT77773.1  phosphoglycerate kinase 1 [Sus scrofa]                                                                      |       |       |       |       |
| gi 335281047 ref XP_003353724.1  | PREDICTED: LOW QUALITY PROTEIN: long-chain fatty acid transport protein 4 [Sus scrofa]                                                                                                                                                                    | 0.817 | 0.381 | 0.401 | 0.431 |

|                                    |                                                                                                                                                                                                                                                            |       |       |       |       |
|------------------------------------|------------------------------------------------------------------------------------------------------------------------------------------------------------------------------------------------------------------------------------------------------------|-------|-------|-------|-------|
| gi 219521964 ref NP_001137170.1    | long-chain-fatty-acid--CoA ligase 3 [Sus scrofa] >gi 217314893 gb ACK36981.1  acyl-CoA synthetase long-chain family member 3 [Sus scrofa]                                                                                                                  | 0.559 | 0.389 | 0.335 | 0.432 |
| gi 47523158 ref NP_999015.1        | glutathione S-transferase A2 [Sus scrofa] >gi 1185280 emb CAA93434.1  glutathione S-transferase [Sus scrofa]                                                                                                                                               | 2.229 | 1.726 | 1.798 | 3.489 |
| gi 83921643 ref NP_001033096.1     | serine/arginine-rich splicing factor 1 [Sus scrofa] >gi 114152157 sp Q3YLA6.3  SRSF1_PIG RecName: Full=Serine/arginine-rich splicing factor 1; AltName: Full=Splicing factor, arginine/serine-rich 1 >gi 73810231 gb AAZ86089.1  splicing factor arginine/ | 0.658 | 0.758 | 0.713 | 0.711 |
| gi 311270878 ref XP_003132994.1    | PREDICTED: AP-1 complex subunit beta-1 isoform 3 [Sus scrofa]                                                                                                                                                                                              | 1.174 | 0.863 | 0.845 | 1.105 |
| gi 335301395 ref XP_003359198.1    | PREDICTED: AP-1 complex subunit beta-1 [Sus scrofa]                                                                                                                                                                                                        |       |       |       |       |
| gi 164669 gb AAA31120.1            | succinyl-CoA synthetase beta-subunit, partial [Sus scrofa]                                                                                                                                                                                                 | 1.758 | 0.974 | 0.824 | 1.244 |
| gi 90109583 pdb 2FPP B             | Chain B, Crystal Structure Of Pig Gtp-Specific Succinyl-Coa Synthetase From Polyethylene Glycol With Chloride Ions >gi 90109575 pdb 2FPI B Chain B, Crystal Structure Of Pig Gtp-Specific Succinyl-Coa Synthetase From Polyethylene Glycol >gi 90109573 p  |       |       |       |       |
| gi 350591336 ref XP_003132357.3    | PREDICTED: succinyl-CoA ligase [GDP-forming] subunit beta, mitochondrial isoform 1 [Sus scrofa]                                                                                                                                                            |       |       |       |       |
| gi 21264506 sp P53590.2 SU CB2_PIG | RecName: Full=Succinyl-CoA ligase [GDP-forming] subunit beta, mitochondrial; AltName: Full=GTP-specific succinyl-CoA synthetase subunit beta; AltName: Full=Succinyl-CoA synthetase beta-G chain; Short=SCS-betaG; Flags:                                  |       |       |       |       |



|                                 |                                                                                                                                                                                                                                                           |       |       |       |       |
|---------------------------------|-----------------------------------------------------------------------------------------------------------------------------------------------------------------------------------------------------------------------------------------------------------|-------|-------|-------|-------|
|                                 | Precursor                                                                                                                                                                                                                                                 |       |       |       |       |
| gi 9955020 pdb 1EUC B           | Chain B, Crystal Structure Of Dephosphorylated Pig Heart, Gtp-Specific Succinyl-Coa Synthetase                                                                                                                                                            |       |       |       |       |
| gi 9955022 pdb 1EUD B           | Chain B, Crystal Structure Of Phosphorylated Pig Heart, Gtp-Specific Succinyl-Coa Synthetase                                                                                                                                                              |       |       |       |       |
| gi 120968 sp P80147.2 GABT_PIG  | RecName: Full=4-aminobutyrate aminotransferase, mitochondrial; AltName: Full=(S)-3-amino-2-methylpropionate transaminase; AltName: Full=GABA aminotransferase; Short=GABA-AT; AltName: Full=Gamma-amino-N-butyrate transaminase; Short=GABA transaminase; | 1.695 | 0.783 | 0.717 | 1.39  |
| gi 284559 pir  A42481           | 4-aminobutyrate transaminase (EC 2.6.1.19) precursor - pig                                                                                                                                                                                                |       |       |       |       |
| gi 47523600 ref NP_999428.1     | 4-aminobutyrate aminotransferase, mitochondrial [Sus scrofa] >gi 531154 gb AAA96981.1  4-aminobutyrate aminotransferase [Sus scrofa]                                                                                                                      |       |       |       |       |
| gi 255327 gb AAB23231.1         | 4-aminobutyrate aminotransferase {EC 2.6.1.19} [swine, liver, Peptide, 472 aa] >gi 38492644 pdb 1OHY C Chain C, 4-Aminobutyrate-Aminotransferase Inactivated By Gamma- Ethynyl Gaba >gi 38492642 pdb 1OHY A Chain A, 4-Aminobutyrate-Aminotransferase Ina |       |       |       |       |
| gi 346644699 ref NP_001231019.1 | protein SET [Sus scrofa]                                                                                                                                                                                                                                  | 1.404 | 4.301 | 2.967 | 2.469 |
| gi 47522760 ref NP_999131.1     | long-chain 3-ketoacyl-CoA thiolase [Sus scrofa] >gi 6165556 gb AAF04612.1  AF028007_1 long-chain 3-ketoacyl-CoA thiolase [Sus scrofa]                                                                                                                     | 0.787 | 0.43  | 0.44  | 0.542 |
| gi 155369760 ref NP_001094      | peroxisomal acyl-coenzyme A                                                                                                                                                                                                                               | 1.021 | 0.945 | 1.126 | 1.452 |

|                                 |                                                                                                                                                                                                                                                                 |       |       |       |       |
|---------------------------------|-----------------------------------------------------------------------------------------------------------------------------------------------------------------------------------------------------------------------------------------------------------------|-------|-------|-------|-------|
| 498.1                           | oxidase 1 [Sus scrofa] >gi 112292673 gb ABI14815.1  palmitoyl acyl-CoA oxidase 1 [Sus scrofa]                                                                                                                                                                   |       |       |       |       |
| gi 350595285 ref XP_003484077.1 | PREDICTED:<br>N-alpha-acetyltransferase 38, NatC auxiliary subunit-like [Sus scrofa] >gi 311275562 ref XP_003134801.1  PREDICTED:<br>N-alpha-acetyltransferase 38, NatC auxiliary subunit-like [Sus scrofa]                                                     | 2.056 | 2.91  | 2.97  | 2.266 |
| gi 335299041 ref XP_001926664.3 | PREDICTED: cytochrome b-c1 complex subunit 1, mitochondrial [Sus scrofa]                                                                                                                                                                                        | 0.764 | 0.572 | 0.812 | 0.72  |
| gi 61744020 gb AA55638.1        | fatty acid synthase [Sus scrofa]                                                                                                                                                                                                                                | 1.431 | 0.884 | 0.92  | 1.488 |
| gi 198443141 pdb 2VZ8 A         | Chain A, Crystal Structure Of Mammalian Fatty Acid Synthase >gi 198443142 pdb 2VZ8 B<br>Chain B, Crystal Structure Of Mammalian Fatty Acid Synthase >gi 198443144 pdb 2VZ9 B<br>Chain B, Crystal Structure Of Mammalian Fatty Acid Synthase In Complex With Nad | ---   | ---   | ---   | ---   |
| gi 153792600 ref NP_001093400.1 | fatty acid synthase [Sus scrofa] >gi 148733529 gb ABR09275.1  fatty acid synthase [Sus scrofa]                                                                                                                                                                  |       |       |       |       |
| gi 335309408 ref XP_003361627.1 | PREDICTED: myosin-11-like, partial [Sus scrofa]                                                                                                                                                                                                                 |       |       |       |       |
| gi 350582036 ref XP_003481179.1 | PREDICTED: U5 small nuclear ribonucleoprotein 200 kDa helicase [Sus scrofa]                                                                                                                                                                                     | 0.686 | 0.793 | 0.968 | 0.662 |
| gi 347800709 ref NP_001231660.1 | scinderin [Sus scrofa]                                                                                                                                                                                                                                          | 1.556 | 1.156 | 1.037 | 1.955 |
| gi 335281857 ref XP_003122760.2 | PREDICTED: catenin delta-1 [Sus scrofa]                                                                                                                                                                                                                         | 0.533 | 0.586 | 0.496 | 0.613 |
| gi 178056532 ref NP_001116688.1 | Z-DNA-binding protein 1 [Sus scrofa] >gi 147223427 emb CAN13344.1  Z-DNA binding protein 1 [Sus scrofa]                                                                                                                                                         | 0.703 | 0.731 | 1.318 | 1.195 |
| gi 215882147 gb ACJ70709.1      | DNA-dependent activator of IFN-regulatory factor [Sus scrofa]                                                                                                                                                                                                   |       |       |       |       |
| gi 350587231 ref XP_003482      | PREDICTED: LOW QUALITY                                                                                                                                                                                                                                          | 1.192 | 0.769 | 0.69  | 0.967 |

|                                 |                                                                                                                                                                                                                                                            |       |       |       |       |
|---------------------------------|------------------------------------------------------------------------------------------------------------------------------------------------------------------------------------------------------------------------------------------------------------|-------|-------|-------|-------|
| 373.1                           | PROTEIN: cytoplasmic dynein 1 heavy chain 1 [Sus scrofa]                                                                                                                                                                                                   |       |       |       |       |
| gi 311251336 ref XP_003124563.1 | PREDICTED: elongation factor Tu, mitochondrial-like [Sus scrofa]                                                                                                                                                                                           | 0.973 | 0.501 | 0.508 | 0.696 |
| gi 47523726 ref NP_999498.1     | dolichyl-diphosphooligosaccharide--protein glycosyltransferase subunit 1 precursor [Sus scrofa] >gi 75056164 sp Q9GMB0.1  RPN1_PIG RecName: Full=Dolichyl-diphosphooligosaccharide--protein glycosyltransferase subunit 1; AltName: Full=Dolichyl-diphosph | 0.625 | 0.627 | 0.547 | 0.709 |
| gi 350593062 ref XP_003133228.3 | PREDICTED: xaa-Pro aminopeptidase 1 isoform 2 [Sus scrofa]                                                                                                                                                                                                 | 1.117 | 0.832 | 0.607 | 1.023 |
| gi 297591969 ref NP_001172062.1 | ubiquitin-conjugating enzyme E2 L3 [Sus scrofa] >gi 219563058 gb ACL27888.1  ubiquitin-conjugating enzyme E2L3 [Sus scrofa]                                                                                                                                | 0.729 | 1.377 | 1.106 | 1.111 |
| gi 311265664 ref XP_003130763.1 | PREDICTED: LOW QUALITY PROTEIN: kinesin-1 heavy chain [Sus scrofa]                                                                                                                                                                                         | 0.823 | 0.71  | 1.111 | 0.887 |
| gi 148234672 ref NP_001090881.1 | porphobilinogen deaminase [Sus scrofa] >gi 112980813 gb ABI29188.1  hydroxymethylbilane synthase [Sus scrofa]                                                                                                                                              | 0.86  | 2.163 | 1.615 | 1.225 |
| gi 350591926 ref XP_003358845.2 | PREDICTED: golgin subfamily B member 1 [Sus scrofa]                                                                                                                                                                                                        | 0.766 | 0.971 | 0.959 | 0.915 |
| gi 113205886 ref NP_001038075.1 | nucleoside diphosphate kinase B [Sus scrofa] >gi 115311824 sp Q2EN76.1  NDKB_PIG RecName: Full=Nucleoside diphosphate kinase B; Short=NDK B; Short=NDP kinase B; AltName: Full=Histidine protein kinase NDKB >gi 87047646 gb ABD18456.1  nm23-H2 [Sus scro | 0.829 | 1.823 | 1.107 | 0.757 |
| gi 311249165 ref XP_003123479.1 | PREDICTED: A-kinase anchor protein 8 [Sus scrofa]                                                                                                                                                                                                          | ---   | ---   | ---   | ---   |
| gi 47522814 ref NP_999159.1     | dihydrolipoyllysine-residue acetyltransferase component of                                                                                                                                                                                                 | 1.069 | 0.753 | 0.7   | 0.863 |

|                                 |                                                                                                                                                                                                                                                           |       |       |       |       |
|---------------------------------|-----------------------------------------------------------------------------------------------------------------------------------------------------------------------------------------------------------------------------------------------------------|-------|-------|-------|-------|
|                                 | pyruvate dehydrogenase complex, mitochondrial precursor [Sus scrofa] >gi 14587786 dbj BAB61720.1  dihydrolipoamide acetyltransferase [Sus scrofa]                                                                                                         |       |       |       |       |
| gi 47523086 ref NP_999309.1     | peroxiredoxin-5, mitochondrial [Sus scrofa] >gi 10305336 gb AAG13452.2 AF110735_1 peroxiredoxin 5 [Sus scrofa]                                                                                                                                            | 1.866 | 0.912 | 0.881 | 1.432 |
| gi 312062797 ref NP_001185848.1 | proactivator polypeptide precursor [Sus scrofa] >gi 310789269 gb ADP24688.1  prosaposin variant 2 [Sus scrofa]                                                                                                                                            | 0.731 | 2.233 | 2.259 | 1.324 |
| gi 194036975 ref XP_001927782.1 | PREDICTED: polyadenylate-binding protein 1 [Sus scrofa]                                                                                                                                                                                                   | 0.878 | 1.445 | 1.228 | 1.255 |
| gi 1332717 gb AAB36056.1        | acylamino acid-releasing enzyme, AARE {EC 3.4.19.1} [swine, liver, Peptide, 732 aa] >gi 1583737 prf 2121361A acyl-AA releasing enzyme                                                                                                                     | 1.103 | 0.791 | 0.977 | 0.93  |
| gi 47522644 ref NP_999088.1     | acylamino-acid-releasing enzyme [Sus scrofa] >gi 1351862 sp P19205.2 ACPH_PIG RecName: Full=Acylamino-acid-releasing enzyme; Short=AARE; AltName: Full=Acyl-peptide hydrolase; Short=APH; AltName: Full=Acylaminoacyl-peptidase >gi 217672 dbj BAA00411.1 |       |       |       |       |
| gi 47523548 ref NP_999398.1     | glutaredoxin-1 [Sus scrofa] >gi 121442 sp P12309.2 GLRX1_PIG RecName: Full=Glutaredoxin-1; AltName: Full=Thioltransferase-1; Short=TTase-1 >gi 332368592 gb AE61370.1  glutaredoxin [Sus scrofa] >gi 326632057 gb ADZ99031.1  glutaredoxin [Sus scrofa]   | 0.25  | 0.475 | 0.406 | 0.527 |
| gi 157831627 pdb 1KTE A         | Chain A, Crystal Structure Of Thioltransferase At 2.2 Angstrom Resolution                                                                                                                                                                                 |       |       |       |       |
| gi 164359 gb AAA30992.1         | apolipoprotein A-I [Sus scrofa]                                                                                                                                                                                                                           | 1.067 | 0.411 | 0.499 | 0.666 |

|                                 |                                                                                                                                                                                                       |       |       |       |       |
|---------------------------------|-------------------------------------------------------------------------------------------------------------------------------------------------------------------------------------------------------|-------|-------|-------|-------|
| gi 37787313 gb AAP69607.1       | nicotinate<br>phosphoribosyltransferase-like<br>protein [Sus scrofa]                                                                                                                                  | 1.437 | 0.862 | 0.804 | 1.205 |
| gi 311252547 ref XP_003125148.1 | PREDICTED: T-complex protein 1<br>subunit delta-like [Sus scrofa]                                                                                                                                     | 2.114 | 0.936 | 1.142 | 1.491 |
| gi 298160970 ref NP_999423.2    | cAMP-dependent protein kinase type<br>II-alpha regulatory subunit [Sus<br>scrofa] >gi 228008282 dbj BAH5769<br>7.1  cAMP-dependent protein kinase<br>regulatory subunit type II alpha [Sus<br>scrofa] | 1.181 | 0.8   | 0.707 | 0.754 |
| gi 325652138 ref NP_001191702.1 | A-kinase anchor protein 1,<br>mitochondrial [Sus<br>scrofa] >gi 321267428 dbj BAJ72691.<br>1  A kinase anchor protein 1 [Sus<br>scrofa]                                                               | 0.686 | 1.18  | 1.032 | 1.126 |
| gi 90200404 gb ABD92704.1       | triosephosphate isomerase 1 [Sus<br>scrofa]                                                                                                                                                           | 2.706 | 1.493 | 1.114 | 3.048 |
| gi 262263205 dbj BAI48105.1     | triosephosphate isomerase 1 [Sus<br>scrofa]                                                                                                                                                           |       |       |       |       |
| gi 35384836 gb AAQ84564.1       | electron transfer flavoprotein alpha<br>subunit precursor [Sus scrofa]                                                                                                                                | 2.734 | 1.242 | 1.16  | 2.173 |
| gi 346986361 ref NP_001231332.1 | electron-transfer-flavoprotein, alpha<br>polypeptide [Sus scrofa]                                                                                                                                     |       |       |       |       |
| gi 385137156 ref NP_001245232.1 | kinectin 1 (kinesin receptor) [Sus<br>scrofa]                                                                                                                                                         | 1.035 | 1.311 | 1.263 | 0.932 |
| gi 350597130 ref XP_003484362.1 | PREDICTED: V-type proton ATPase<br>subunit B, brain isoform-like [Sus<br>scrofa] >gi 350592249 ref XP_00348<br>3427.1  PREDICTED: V-type proton<br>ATPase subunit B, brain isoform [Sus<br>scrofa]    | 0.718 | 0.671 | 0.6   | 0.752 |
| gi 350591034 ref XP_003483187.1 | PREDICTED: glycerol-3-phosphate<br>dehydrogenase 1-like protein-like<br>[Sus scrofa]                                                                                                                  | 1.304 | 0.697 | 0.704 | 0.941 |
| gi 353819 prf 1106188C          | cytochrome b5                                                                                                                                                                                         | 0.588 | 0.84  | 0.666 | 0.833 |
| gi 48976129 ref NP_001001770.1  | cytochrome b5 [Sus<br>scrofa] >gi 6166051 sp P00172.3 CY<br>B5_PIG RecName: Full=Cytochrome<br>b5 >gi 2642486 gb AAC48779.1 <br>cytochrome b5 [Sus scrofa]                                            |       |       |       |       |
| gi 311277231 ref XP_003135      | PREDICTED: trimethyllysine                                                                                                                                                                            | 1.143 | 5.553 | 3.922 | 1.817 |

|                                   |                                                                                                                                                                                                                                                           |       |       |       |       |
|-----------------------------------|-----------------------------------------------------------------------------------------------------------------------------------------------------------------------------------------------------------------------------------------------------------|-------|-------|-------|-------|
| 559.1                             | dioxygenase, mitochondrial-like [Sus scrofa]                                                                                                                                                                                                              |       |       |       |       |
| gi 154147698 ref NP_001093665.1   | eukaryotic initiation factor 4A-II [Sus scrofa] >gi 85792276 gb ABC84195.1  eukaryotic translation initiation factor 4A isoform 2 [Sus scrofa]                                                                                                            | 0.841 | 0.769 | 0.49  | 1.06  |
| gi 311270662 ref XP_003132938.1   | PREDICTED:<br>phosphatidylethanolamine-binding protein 1-like [Sus scrofa]                                                                                                                                                                                | 1.826 | 3.013 | 2.036 | 1.876 |
| gi 178056588 ref NP_001116645.1   | ras-related protein Rab-1B [Sus scrofa] >gi 122064946 sp Q06AU7.1  RAB1B_PIG RecName: Full=Ras-related protein Rab-1B >gi 115394758 gb ABI97173.1  RAB1B [Sus scrofa]                                                                                     | 0.951 | 0.817 | 1.011 | 1.055 |
| gi 62511144 sp Q764M5.1 STAT1_PIG | RecName: Full=Signal transducer and activator of transcription 1 >gi 47523306 ref NP_998934.1  signal transducer and activator of transcription 1 [Sus scrofa] >gi 40363629 dbj BAD06318.1  signal transducer and activator of transcription 1 [Sus scrof | 1.669 | 1.216 | 1.57  | 1.391 |
| gi 353468887 gb AER08620.1        | signal transducer and activator of transcription 1 [Sus scrofa]                                                                                                                                                                                           |       |       |       |       |
| gi 353468891 gb AER08622.1        | signal transducer and activator of transcription 1 transcript variant 2 [Sus scrofa]                                                                                                                                                                      |       |       |       |       |
| gi 353468889 gb AER08621.1        | signal transducer and activator of transcription 1 transcript variant 1 [Sus scrofa]                                                                                                                                                                      |       |       |       |       |
| gi 194044626 ref XP_001927289.1   | PREDICTED: 14-3-3 protein beta/alpha isoform 1 [Sus scrofa]                                                                                                                                                                                               | 2.234 | 1.272 | 0.948 | 1.724 |
| gi 2947100 gb AAC39170.1          | 15-oxoprostaglandin 13-reductase [Sus scrofa]                                                                                                                                                                                                             | 1.605 | 1.793 | 2.825 | 3.912 |
| gi 47523824 ref NP_999550.1       | prostaglandin reductase 1 [Sus scrofa] >gi 2498509 sp Q29073.1 PTGR1_PIG RecName: Full=Prostaglandin reductase 1; Short=PRG-1; AltName: Full=15-oxoprostaglandin 13-reductase; AltName: Full=NADP-dependent leukotriene                                   |       |       |       |       |

|                                 |                                                                                                                                                                                                                                                           |       |       |       |       |
|---------------------------------|-----------------------------------------------------------------------------------------------------------------------------------------------------------------------------------------------------------------------------------------------------------|-------|-------|-------|-------|
|                                 | B4 12-hydroxydehydrogenase >gi 11                                                                                                                                                                                                                         |       |       |       |       |
| gi 1845 emb CAA48565.1          | aminoacylase I [Sus scrofa]                                                                                                                                                                                                                               | 1.855 | 2.955 | 3.909 | 2.438 |
| gi 47522690 ref NP_999061.1     | aminoacylase-1 [Sus scrofa] >gi 584724 sp P37111.2 ACY1_PIG RecName: Full=Aminoacylase-1; Short=ACY-1; AltName: Full=N-acyl-L-amino-acid amidohydrolase >gi 533335 dbj BAA02731.1  N-acylamino acid aminohydrolase (Aminoacylase 1) [Sus scrofa] >gi 4586 |       |       |       |       |
| gi 350538593 ref NP_001233247.1 | phosphoglucomutase-1 [Sus scrofa] >gi 321574209 gb ADW94631.1  phosphoglucomutase 1 [Sus scrofa]                                                                                                                                                          | 1.17  | 0.359 | 0.319 | 0.381 |
| gi 194036835 ref XP_001924895.1 | PREDICTED: 4-trimethylaminobutyraldehyde dehydrogenase [Sus scrofa]                                                                                                                                                                                       | 1.684 | 0.809 | 0.783 | 1.223 |
| gi 264681460 ref NP_001161124.1 | acyl carrier protein, mitochondrial [Sus scrofa] >gi 262204908 dbj BAI48034.1  NADH dehydrogenase (ubiquinone) 1, alpha/beta subcomplex, 1, 8kDa [Sus scrofa]                                                                                             | 0.35  | 0.688 | 0.513 | 0.468 |
| gi 311258000 ref XP_003127386.1 | PREDICTED: AP-2 complex subunit alpha-1 isoform 1 [Sus scrofa]                                                                                                                                                                                            | 1.207 | 0.648 | 0.815 | 1.052 |
| gi 311258002 ref XP_003127387.1 | PREDICTED: AP-2 complex subunit alpha-1 isoform 2 [Sus scrofa]                                                                                                                                                                                            |       |       |       |       |
| gi 311258004 ref XP_003127388.1 | PREDICTED: AP-2 complex subunit alpha-1 isoform 3 [Sus scrofa]                                                                                                                                                                                            |       |       |       |       |
| gi 311247353 ref XP_003122594.1 | PREDICTED: N-acetylated alpha-linked acidic dipeptidase-like 1 [Sus scrofa]                                                                                                                                                                               | 1.445 | 1.262 | 2.702 | 0.96  |
| gi 118675 sp P09623.1 DLDH_PIG  | RecName: Full=Dihydrolipoyl dehydrogenase, mitochondrial; AltName: Full=Dihydrolipoamide dehydrogenase; Flags: Precursor >gi 47522940 ref NP_999227.1  dihydrolipoyl dehydrogenase, mitochondrial precursor [Sus scrofa] >gi 164539 gb AAA31069.1  lipoam | 0.665 | 0.684 | 0.543 | 0.589 |
| gi 122220 sp P17630.1 TCO1      | RecName: Full=Transcobalamin-1;                                                                                                                                                                                                                           | 1.622 | 1.801 | 1.275 | 2.573 |

|                                 |                                                                                                                                                                                                                                                |       |       |       |       |
|---------------------------------|------------------------------------------------------------------------------------------------------------------------------------------------------------------------------------------------------------------------------------------------|-------|-------|-------|-------|
| _PIG                            | Short=TC-1; AltName:<br>Full=Cobalophilin; AltName:<br>Full=Haptocorrin; AltName:<br>Full=Protein R; AltName:<br>Full=Transcobalamin I; Short=TC I;<br>Short=TCI; Flags:<br>Precursor >gi 1964 emb CAA36800.1 <br>unnamed protein product [Sus |       |       |       |       |
| gi 335306899 ref XP_003360619.1 | PREDICTED: transcobalamin-1 isoform 1 [Sus scrofa]                                                                                                                                                                                             |       |       |       |       |
| gi 47522620 ref NP_999100.1     | proteasome subunit beta type-8 [Sus scrofa] >gi 4545092 gb AAD22390.1 <br>AF059493_1 proteasome subunit LMP7 [Sus scrofa]                                                                                                                      |       |       |       |       |
| gi 335282599 ref XP_003123290.2 | PREDICTED: interleukin enhancer-binding factor 3 [Sus scrofa]                                                                                                                                                                                  | 1.011 | 1.226 | 1.104 | 1.319 |
| gi 335284501 ref XP_003124603.2 | PREDICTED: cytochrome b-c1 complex subunit 2, mitochondrial-like [Sus scrofa]                                                                                                                                                                  | 0.886 | 0.408 | 0.423 | 0.451 |
| gi 145559663 gb ABP73657.1      | MHC class I antigen [Sus scrofa]                                                                                                                                                                                                               | 0.936 | 0.687 | 0.802 | 1.355 |
| gi 350529387 ref NP_001231927.1 | basic transcription factor 3 [Sus scrofa]                                                                                                                                                                                                      | 1.132 | 3.045 | 1.918 | 0.87  |
| gi 264681436 ref NP_001161113.1 | copper transport protein ATOX1 [Sus scrofa] >gi 262036932 dbj BAI47601.1 <br>antioxidant protein 1 homolog (yeast) [Sus scrofa]                                                                                                                | 1.28  | 2.727 | 3.209 | 3.307 |
| gi 350596533 ref XP_003484288.1 | PREDICTED: copper transport protein ATOX1-like, partial [Sus scrofa]                                                                                                                                                                           |       |       |       |       |
| gi 335294829 ref XP_003357324.1 | PREDICTED: acetyl-CoA acetyltransferase, mitochondrial [Sus scrofa]                                                                                                                                                                            | 1.112 | 0.989 | 0.72  | 1.428 |
| gi 350594033 ref XP_003483821.1 | PREDICTED: UDP-glucuronosyltransferase 1-10 isoform 2 [Sus scrofa]                                                                                                                                                                             | 0.806 | 0.583 | 0.609 | 1.105 |
| gi 350581149 ref XP_003480971.1 | PREDICTED: matrin-3 [Sus scrofa] >gi 350581147 ref XP_003480970.1 <br>PREDICTED: matrin-3 [Sus scrofa] >gi 335283551 ref XP_003354341.1 <br>PREDICTED: matrin-3 [Sus scrofa] >gi 311250254 ref XP_00312                                        | 0.329 | 0.595 | 0.655 | 0.656 |



|                                  |                                                                                                                                                                                                       |       |       |       |       |
|----------------------------------|-------------------------------------------------------------------------------------------------------------------------------------------------------------------------------------------------------|-------|-------|-------|-------|
|                                  | 4025.1  PREDICTED: matrin-3 isoform 1 [Sus scrofa]                                                                                                                                                    |       |       |       |       |
| gi 350582222 ref XP_003481226.1  | PREDICTED: LOW QUALITY PROTEIN: dynactin subunit 1 [Sus scrofa]                                                                                                                                       | 1.234 | 2.422 | 2.124 | 1.903 |
| gi 47523650 ref NP_999459.1      | tropomodulin-3 [Sus scrofa] >gi 7288863 gb AAF45300.1 AF237632_1 ubiquitous tropomodulin U-Tmod [Sus scrofa]                                                                                          | 1.732 | 1.748 | 1.283 | 1.247 |
| gi 335292272 ref XP_003356696.1  | PREDICTED: fumarylacetoacetase-like [Sus scrofa]                                                                                                                                                      | 1.473 | 3.38  | 2.688 | 1.629 |
| gi 335297524 ref XP_003358060.1  | PREDICTED: 116 kDa U5 small nuclear ribonucleoprotein component [Sus scrofa] >gi 311267074 ref XP_003131380.1  PREDICTED: 116 kDa U5 small nuclear ribonucleoprotein component isoform 1 [Sus scrofa] | 1.432 | 1.101 | 1.086 | 1.3   |
| gi 335297526 ref XP_003131381.2  | PREDICTED: 116 kDa U5 small nuclear ribonucleoprotein component isoform 2 [Sus scrofa]                                                                                                                |       |       |       |       |
| gi 55977740 sp Q29387.2 EF1G_PIG | RecName: Full=Elongation factor 1-gamma; Short=EF-1-gamma; AltName: Full=eEF-1B gamma >gi 19111049 gb AAL85414.1 AF480162_1 eukaryotic elongation factor 1 gamma-like protein [Sus scrofa]            | 1.33  | 0.435 | 0.704 | 1.36  |
| gi 350580027 ref XP_003480738.1  | PREDICTED: elongation factor 1-gamma [Sus scrofa]                                                                                                                                                     |       |       |       |       |
| gi 113196863 gb ABI31729.1       | low molecular mass protein 7 [Sus scrofa]                                                                                                                                                             | 1.128 | 1.616 | 1.651 | 1.131 |
| gi 147225186 emb CAN13318.1      | proteasome (prosome, macropain) subunit, beta type, 8 (large multifunctional protease 7) [Sus scrofa]                                                                                                 |       |       |       |       |
| gi 311260174 ref XP_001924154.2  | PREDICTED: proteasome subunit beta type-8 [Sus scrofa] >gi 147225184 emb CAN13316.1  proteasome (prosome, macropain) subunit, beta type, 8 (large multifunctional protease 7) [Sus scrofa]            |       |       |       |       |

|                                 |                                                                                                                                                                                                                                                           |       |       |       |       |
|---------------------------------|-----------------------------------------------------------------------------------------------------------------------------------------------------------------------------------------------------------------------------------------------------------|-------|-------|-------|-------|
| gi 72535190 ref NP_001026957.1  | ras-related protein Rab-1A [Sus scrofa] >gi 75056559 sp Q52NJ2.3 RAB1A_PIG RecName: Full=Ras-related protein Rab-1A >gi 62868642 gb AA17509.1  Ras-related protein Rab-1A [Sus scrofa]                                                                    | 0.891 | 0.85  | 0.853 | 0.998 |
| gi 178056596 ref NP_001116608.1 | U6 snRNA-associated Sm-like protein LSm2 [Sus scrofa] >gi 147225158 emb CAN13335.1  LSM2 homolog, U6 small nuclear RNA associated (S. cerevisiae) [Sus scrofa]                                                                                            | 0.96  | 2.495 | 1.884 | 1.641 |
| gi 311276332 ref XP_003135175.1 | PREDICTED: 3-hydroxyacyl-CoA dehydrogenase type-2-like isoform 2 [Sus scrofa]                                                                                                                                                                             | 1.185 | 0.75  | 0.745 | 1.037 |
| gi 311276336 ref XP_003135176.1 | PREDICTED: 3-hydroxyacyl-CoA dehydrogenase type-2-like isoform 3 [Sus scrofa]                                                                                                                                                                             |       |       |       |       |
| gi 311276334 ref XP_003135174.1 | PREDICTED: 3-hydroxyacyl-CoA dehydrogenase type-2-like isoform 1 [Sus scrofa]                                                                                                                                                                             |       |       |       |       |
| gi 346986418 ref NP_001231359.1 | DnaJ (Hsp40) homolog, subfamily B, member 1 [Sus scrofa]                                                                                                                                                                                                  | 1.162 | 1.428 | 1.22  | 1.139 |
| gi 47522680 ref NP_999069.1     | neutral alpha-glucosidase AB precursor [Sus scrofa] >gi 54037147 sp P79403.1 GANAB_PIG RecName: Full=Neutral alpha-glucosidase AB; AltName: Full=Alpha-glucosidase 2; AltName: Full=Glucosidase II subunit alpha; Flags: Precursor >gi 1890664 gb AAB4975 | 0.917 | 0.548 | 0.547 | 0.771 |
| gi 349585085 ref NP_001231804.1 | RAB11B, member RAS oncogene family [Sus scrofa]                                                                                                                                                                                                           | 1.031 | 0.664 | 0.52  | 0.848 |
| gi 335296459 ref XP_003130769.2 | PREDICTED: vimentin-like [Sus scrofa]                                                                                                                                                                                                                     | 0.816 | 1.537 | 1.283 | 1.234 |
| gi 47523888 ref NP_999583.1     | ADP/ATP translocase 3 [Sus scrofa] >gi 52000613 sp Q6QRN9.3 ADT3_PIG RecName: Full=ADP/ATP translocase 3; AltName: Full=ADP,ATP carrier protein 3; AltName: Full=Adenine                                                                                  | 0.649 | 0.471 | 0.325 | 0.687 |

|                                  |                                                                                                                                                                                                                                       |         |          |          |         |
|----------------------------------|---------------------------------------------------------------------------------------------------------------------------------------------------------------------------------------------------------------------------------------|---------|----------|----------|---------|
|                                  | nucleotide translocator 3; Short=ANT 3; AltName: Full=Solute carrier family 25 m                                                                                                                                                      |         |          |          |         |
| gi 1827464 dbj BAA19181.1        | metallothionein isoform [Sus scrofa]                                                                                                                                                                                                  | 576.898 | 5099.604 | 2186.181 | 949.007 |
| gi 18202369 sp P79431.1 MT1E_PIG | RecName: Full=Metallothionein-1E; Short=MT-1E; AltName: Full=Metallothionein-IE; Short=MT-IE >gi 1827462 dbj BAA19180.1  metallothionein isoform [Sus scrofa]                                                                         |         |          |          |         |
| gi 335281589 ref XP_003353840.1  | PREDICTED: 1-phosphatidylinositol-4,5-bisphosphate phosphodiesterase beta-3 isoform 2 [Sus scrofa]                                                                                                                                    | 1.089   | 1.046    | 1.031    | 1.203   |
| gi 335281591 ref XP_003122641.2  | PREDICTED: 1-phosphatidylinositol-4,5-bisphosphate phosphodiesterase beta-3 isoform 1 [Sus scrofa]                                                                                                                                    |         |          |          |         |
| gi 311259696 ref XP_003128216.1  | PREDICTED: LOW QUALITY PROTEIN: desmoplakin-like [Sus scrofa]                                                                                                                                                                         | 1.077   | 0.805    | 1.083    | 1       |
| gi 350596559 ref XP_003361362.2  | PREDICTED: ectonucleotide pyrophosphatase/phosphodiesterase family member 3-like, partial [Sus scrofa]                                                                                                                                | 0.727   | 0.735    | 0.828    | 0.662   |
| gi 350580256 ref XP_003480773.1  | PREDICTED: nucleobindin-2 [Sus scrofa]                                                                                                                                                                                                | 0.608   | 1.207    | 1.564    | 1.02    |
| gi 350580258 ref XP_003122998.3  | PREDICTED: nucleobindin-2 isoform 2 [Sus scrofa]                                                                                                                                                                                      |         |          |          |         |
| gi 311261483 ref XP_003128742.1  | PREDICTED: LOW QUALITY PROTEIN: golgin subfamily A member 5-like [Sus scrofa]                                                                                                                                                         | 1.092   | 1.63     | 1.604    | 1.104   |
| gi 342187276 ref NP_001230112.1  | AP-2 complex subunit beta [Sus scrofa]                                                                                                                                                                                                | 0.861   | 0.815    | 0.909    | 1.118   |
| gi 47522662 ref NP_999076.1      | membrane-associated progesterone receptor component 1 [Sus scrofa] >gi 6647580 sp Q95250.3 PGRC1_PIG RecName: Full=Membrane-associated progesterone receptor component 1 >gi 1657409 emb CAA68050.1  steroid membrane binding protein | 0.562   | 0.373    | 0.608    | 0.603   |

|                                 |                                                                                                                                                                                                               |       |       |       |       |
|---------------------------------|---------------------------------------------------------------------------------------------------------------------------------------------------------------------------------------------------------------|-------|-------|-------|-------|
|                                 | [Sus scrofa]                                                                                                                                                                                                  |       |       |       |       |
| gi 335286672 ref XP_003125720.2 | PREDICTED: transgelin-2-like isoform 1 [Sus scrofa] >gi 335286674 ref XP_003355153.1  PREDICTED: transgelin-2-like isoform 2 [Sus scrofa]                                                                     | 1.501 | 0.95  | 0.996 | 1.143 |
| gi 311259388 ref XP_003128071.1 | PREDICTED: cytochrome b-c1 complex subunit 6, mitochondrial-like [Sus scrofa]                                                                                                                                 | 0.606 | 0.434 | 0.581 | 0.418 |
| gi 194042189 ref XP_001924213.1 | PREDICTED: annexin A11 [Sus scrofa]                                                                                                                                                                           | 1.218 | 0.642 | 0.78  | 0.835 |
| gi 346421435 ref NP_001231091.1 | sorbitol dehydrogenase [Sus scrofa]                                                                                                                                                                           | 1.724 | 1.163 | 0.884 | 1.309 |
| gi 544074 sp Q99028.1 COMT_PIG  | RecName: Full=Catechol O-methyltransferase                                                                                                                                                                    | 1.179 | 0.618 | 0.878 | 1.088 |
| gi 305855180 ref NP_001182259.1 | catechol O-methyltransferase [Sus scrofa] >gi 285818436 gb ADC38891.1  catechol-O-methyltransferase [Sus scrofa]                                                                                              |       |       |       |       |
| gi 350586831 ref XP_003482287.1 | PREDICTED: cytochrome c oxidase subunit 5A, mitochondrial-like isoform 1 [Sus scrofa] >gi 350586833 ref XP_003482288.1  PREDICTED: cytochrome c oxidase subunit 5A, mitochondrial-like isoform 2 [Sus scrofa] | 0.26  | 0.519 | 0.473 | 0.375 |
| gi 350579447 ref XP_003480607.1 | PREDICTED: protein NipSnap homolog 3A [Sus scrofa]                                                                                                                                                            | 0.815 | 1.531 | 1.298 | 1.206 |
| gi 335280113 ref XP_003121789.2 | PREDICTED: LOW QUALITY PROTEIN: 60S ribosomal protein L4 [Sus scrofa]                                                                                                                                         | 0.772 | 0.477 | 0.419 | 1.1   |
| gi 311249564 ref XP_003123691.1 | PREDICTED: heterogeneous nuclear ribonucleoprotein H [Sus scrofa]                                                                                                                                             | 0.699 | 0.928 | 0.779 | 0.843 |
| gi 343790906 ref NP_001230510.1 | calcineurin-like phosphoesterase domain containing 1 [Sus scrofa]                                                                                                                                             | 0.755 | 2.436 | 1.559 | 1.194 |
| gi 113205878 ref NP_001038072.1 | delta(3,5)-Delta(2,4)-dienoyl-CoA isomerase, mitochondrial [Sus scrofa] >gi 90024980 gb AAZ82038.2  peroxisomal enoyl coenzyme A hydratase 1 [Sus scrofa]                                                     | 1.299 | 1.408 | 0.971 | 1.065 |

|                                 |                                                                                                                                               |       |       |       |       |
|---------------------------------|-----------------------------------------------------------------------------------------------------------------------------------------------|-------|-------|-------|-------|
| gi 120564445 gb ABM30148.1      | peroxisomal enoyl coenzyme A hydratase 1 [Sus scrofa]                                                                                         |       |       |       |       |
| gi 311268173 ref XP_003131919.1 | PREDICTED: myb-binding protein 1A [Sus scrofa]                                                                                                | 0.608 | 2.053 | 1.081 | 1.739 |
| gi 47523406 ref NP_999324.1     | polymeric immunoglobulin receptor precursor [Sus scrofa] >gi 6863080 dbj BAA84283.2  poly-Ig receptor [Sus scrofa]                            | 0.825 | 0.854 | 0.69  | 1.094 |
| gi 312283580 ref NP_999292.2    | superoxide dismutase [Mn], mitochondrial [Sus scrofa]                                                                                         | 0.97  | 1.8   | 0.677 | 0.974 |
| gi 335296662 ref XP_003130891.2 | PREDICTED: 6-phosphofructokinase type C [Sus scrofa]                                                                                          | 1.462 | 0.995 | 1.326 | 1.464 |
| gi 335281560 ref XP_003353830.1 | PREDICTED: splicing factor 1 isoform 2 [Sus scrofa]                                                                                           | 1.14  | 1.611 | 1.992 | 0.968 |
| gi 335281562 ref XP_003353831.1 | PREDICTED: splicing factor 1 isoform 3 [Sus scrofa]                                                                                           |       |       |       |       |
| gi 335281564 ref XP_003122635.2 | PREDICTED: splicing factor 1 isoform 1 [Sus scrofa]                                                                                           |       |       |       |       |
| gi 346986445 ref NP_001231372.1 | NSFL1 (p97) cofactor (p47) [Sus scrofa]                                                                                                       | 1.188 | 1.88  | 1.872 | 1.52  |
| gi 154147660 ref NP_001093666.1 | eukaryotic initiation factor 4A-I [Sus scrofa] >gi 85792232 gb ABC84193.1  eukaryotic translation initiation factor 4A isoform 1 [Sus scrofa] | 1.139 | 0.781 | 0.373 | 1.323 |
| gi 335308568 ref XP_003361283.1 | PREDICTED: eukaryotic initiation factor 4A-I-like [Sus scrofa]                                                                                |       |       |       |       |
| gi 148225750 ref NP_001090973.1 | heat shock protein 105 kDa [Sus scrofa] >gi 141521428 gb ABO88027.1  heat shock 105kDa/110kDa protein 1 [Sus scrofa]                          | 0.908 | 1.023 | 0.959 | 1.296 |
| gi 311274155 ref XP_003134215.1 | PREDICTED: NADH dehydrogenase [ubiquinone] iron-sulfur protein 6, mitochondrial-like [Sus scrofa]                                             | 0.891 | 0.494 | 1.079 | 0.589 |
| gi 3746946 gb AAC64131.1        | phosphoglucomutase 1 [Sus scrofa] >gi 3746944 gb AAC64130.1  phosphoglucomutase 1 [Sus scrofa]                                                | 0.855 | 0.665 | 0.452 | 0.453 |
| gi 350578005 ref XP_001924268.4 | PREDICTED: ezrin [Sus scrofa]                                                                                                                 | 1.43  | 1.542 | 1.413 | 1.084 |
| gi 343790977 ref NP_001230537.1 | phospholysine phosphohistidine inorganic pyrophosphate phosphatase [Sus scrofa]                                                               | 2.963 | 1.89  | 1.485 | 1.259 |
| gi 350577999 ref XP_001928      | PREDICTED: ezrin-like [Sus scrofa]                                                                                                            | 1.848 | 0.828 | 1.314 | 1.341 |

|                                 |                                                                                                                                                                                                                                                           |       |       |       |       |
|---------------------------------|-----------------------------------------------------------------------------------------------------------------------------------------------------------------------------------------------------------------------------------------------------------|-------|-------|-------|-------|
| 755.4                           |                                                                                                                                                                                                                                                           |       |       |       |       |
| gi 350580184 ref XP_003353965.2 | PREDICTED: reticulocalbin-1-like isoform 2 [Sus scrofa]                                                                                                                                                                                                   | 0.631 | 0.986 | 1.263 | 0.758 |
| gi 311259408 ref XP_003128090.1 | PREDICTED: peroxiredoxin-1 isoform 5 [Sus scrofa]                                                                                                                                                                                                         | 2.943 | 1.704 | 1.309 | 3.046 |
| gi 311259416 ref XP_003128087.1 | PREDICTED: peroxiredoxin-1 isoform 2 [Sus scrofa] >gi 311259412 ref XP_003128089.1  PREDICTED: peroxiredoxin-1 isoform 4 [Sus scrofa] >gi 311259414 ref XP_003128088.1  PREDICTED: peroxiredoxin-1 isoform 3 [Sus scrofa] >gi 311259410 ref XP_003128086. |       |       |       |       |
| gi 1236646 gb AAC48775.1        | ch4 and secrete domains of swine IgM [Sus scrofa]                                                                                                                                                                                                         | 0.779 | 0.684 | 0.478 | 0.807 |
| gi 291202695 dbj BAI82566.1     | IgM heavy chain constant region [Sus scrofa]                                                                                                                                                                                                              |       |       |       |       |
| gi 113205854 ref NP_001038066.1 | 40S ribosomal protein S3 [Sus scrofa] >gi 115502828 sp Q0Z8U2.1  RS3_PIG RecName: Full=40S ribosomal protein S3 >gi 110006645 gb ABG48767.1  ribosomal protein S3 [Sus scrofa]                                                                            | 0.59  | 0.43  | 0.367 | 0.585 |
| gi 47523792 ref NP_999532.1     | catenin beta-1 [Sus scrofa] >gi 167834655 gb ACA03158.1  beta-catenin [Sus scrofa] >gi 18146999 dbj BAB82984.1  beta-catenin [Sus scrofa]                                                                                                                 | 0.615 | 0.612 | 0.533 | 0.625 |
| gi 335302729 ref XP_003359534.1 | PREDICTED: catenin beta-1-like [Sus scrofa]                                                                                                                                                                                                               |       |       |       |       |
| gi 311275253 ref XP_003134650.1 | PREDICTED: single-stranded DNA-binding protein, mitochondrial-like isoform 1 [Sus scrofa]                                                                                                                                                                 | 0.973 | 1.943 | 1.71  | 1.215 |
| gi 47523618 ref NP_999441.1     | citrate synthase, mitochondrial precursor [Sus scrofa] >gi 116470 sp P00889.2 CISY_PIG RecName: Full=Citrate synthase, mitochondrial; Flags: Precursor >gi 164419 gb AAA31017.1  citrate synthase precursor (EC                                           | 2.016 | 0.966 | 1.408 | 2.124 |

|                                   |                                                                                                                                                                                                                                                           |       |       |       |       |
|-----------------------------------|-----------------------------------------------------------------------------------------------------------------------------------------------------------------------------------------------------------------------------------------------------------|-------|-------|-------|-------|
|                                   | 4.1.3.7) [Sus scrofa]                                                                                                                                                                                                                                     |       |       |       |       |
| gi 157834775 pdb 2CTS A           | Chain A, Crystallographic Refinement And Atomic Models Of Two Different Forms Of Citrate Synthase At 2.7 And 1.7 Angstroms Resolution                                                                                                                     |       |       |       |       |
| gi 253723327 pdb 3ENJ A           | Chain A, Structure Of Pig Heart Citrate Synthase At 1.78 A Resolution >gi 157830720 pdb 1CTS A Chain A, Crystallographic Refinement And Atomic Models Of Two Different Forms Of Citrate Synthase At 2.7 And 1.7 Angstroms Resolution >gi 230994 pdb 4CTS  |       |       |       |       |
| gi 311247022 ref XP_003122449.1   | PREDICTED: cadherin-related family member 5 [Sus scrofa]                                                                                                                                                                                                  | 0.425 | 0.525 | 0.89  | 0.481 |
| gi 335310692 ref XP_003362151.1   | PREDICTED: protein LZIC-like [Sus scrofa]                                                                                                                                                                                                                 | 1.219 | 2.177 | 2.93  | 1.599 |
| gi 55583765 sp Q863Z0.3 PSME2_PIG | RecName: Full=Proteasome activator complex subunit 2; AltName: Full=Proteasome activator 28 subunit beta; Short=PA28b; Short=PA28beta >gi 47523632 ref NP_999444.1  proteasome activator complex subunit 2 [Sus scrofa] >gi 34978648 gb AAQ83575.1  prote | 1.436 | 0.64  | 1.096 | 1.422 |
| gi 342349319 ref NP_001230139.1   | calnexin precursor [Sus scrofa]                                                                                                                                                                                                                           | 0.685 | 0.549 | 0.7   | 0.759 |
| gi 350590415 ref XP_003131608.3   | PREDICTED: prohibitin-like [Sus scrofa]                                                                                                                                                                                                                   | 1.62  | 0.765 | 0.723 | 1.186 |
| gi 311258421 ref XP_003127605.1   | PREDICTED: 6-phosphogluconate dehydrogenase, decarboxylating [Sus scrofa]                                                                                                                                                                                 | 1.967 | 1.556 | 1.349 | 1.821 |
| gi 71361861 gb AAZ30034.1         | Mx1 [Sus scrofa]                                                                                                                                                                                                                                          | 0.967 | 1.069 | 0.893 | 1.743 |
| gi 156720190 dbj BAF76736.1       | Mx1 [Sus scrofa]                                                                                                                                                                                                                                          |       |       |       |       |
| gi 343488474 ref NP_001230453.1   | elongation factor 1-beta [Sus scrofa]                                                                                                                                                                                                                     | 0.927 | 1.277 | 2.426 | 1.258 |
| gi 347300276 ref NP_001231441.1   | poly(rC) binding protein 2 [Sus scrofa]                                                                                                                                                                                                                   | 1.094 | 0.854 | 0.85  | 1.302 |
| gi 345090969 ref NP_001230        | septin 2 [Sus scrofa]                                                                                                                                                                                                                                     | 1.57  | 1.505 | 1.305 | 1.276 |

|                                 |                                                                                                                                                                                                                                                           |       |       |       |       |
|---------------------------------|-----------------------------------------------------------------------------------------------------------------------------------------------------------------------------------------------------------------------------------------------------------|-------|-------|-------|-------|
| 722.1                           |                                                                                                                                                                                                                                                           |       |       |       |       |
| gi 448581 prf 1917268B          | pyruvate dehydrogenase:SUBUNIT=beta                                                                                                                                                                                                                       | 1.03  | 0.518 | 0.699 | 0.734 |
| gi 346986351 ref NP_001231327.1 | pyruvate dehydrogenase E1 component subunit beta, mitochondrial [Sus scrofa]                                                                                                                                                                              |       |       |       |       |
| gi 311268663 ref XP_003132151.1 | PREDICTED: 3-ketoacyl-CoA thiolase A, peroxisomal isoform 1 [Sus scrofa]                                                                                                                                                                                  | 2.147 | 1.584 | 1.713 | 1.641 |
| gi 349732238 ref NP_001231864.1 | transaldolase [Sus scrofa]                                                                                                                                                                                                                                | 1.195 | 2.121 | 1.642 | 1.788 |
| gi 213021241 ref NP_001132944.1 | proteasome subunit alpha type-6 [Sus scrofa] >gi 210062872 gb ACJ06406.1  proteasome subunit alpha type 6 [Sus scrofa]                                                                                                                                    | 1.055 | 1.229 | 1.076 | 1.231 |
| gi 335296435 ref XP_003357777.1 | PREDICTED: cytoplasmic aconitate hydratase [Sus scrofa]                                                                                                                                                                                                   | 2.956 | 1.061 | 1.068 | 1.935 |
| gi 350587882 ref XP_003129304.3 | PREDICTED: caspase-6-like [Sus scrofa]                                                                                                                                                                                                                    | 0.925 | 2.035 | 1.475 | 1.488 |
| gi 335296241 ref XP_003357722.1 | PREDICTED: ladinin-1-like [Sus scrofa]                                                                                                                                                                                                                    | 0.587 | 0.68  | 0.71  | 0.87  |
| gi 311254260 ref XP_001929592.2 | PREDICTED: interleukin enhancer-binding factor 2 [Sus scrofa]                                                                                                                                                                                             | 1.471 | 1.176 | 0.872 | 1.452 |
| gi 343887442 ref NP_001230623.1 | heterogeneous nuclear ribonucleoprotein C (C1/C2) 2 [Sus scrofa]                                                                                                                                                                                          | 0.738 | 0.645 | 0.614 | 0.827 |
| gi 311261988 ref XP_003128958.1 | PREDICTED: phosphoglucomutase-2 [Sus scrofa]                                                                                                                                                                                                              | 1.677 | 1.345 | 1.583 | 2.313 |
| gi 2833353 sp Q29058.1 LEG4_PIG | RecName: Full=Galectin-4; Short=Gal-4; AltName: Full=L-36 lactose-binding protein; Short=L36LBP; AltName: Full=Lactose-binding lectin 4 >gi 47522788 ref NP_999146.1  galectin-4 [Sus scrofa] >gi 623346 emb CAA55884.1  L-36 lactose binding protein [Su | 0.835 | 1.744 | 1.568 | 1.613 |
| gi 350594031 ref XP_003483820.1 | PREDICTED: UDP-glucuronosyltransferase 1-10 isoform 1 [Sus scrofa]                                                                                                                                                                                        | 0.773 | 0.689 | 0.694 | 0.597 |
| gi 350591042 ref XP_003132      | PREDICTED: programmed cell death                                                                                                                                                                                                                          | 1.284 | 0.954 | 1.22  | 1.59  |



|                                 |                                                                                                                                                                                                                                                          |       |       |       |       |
|---------------------------------|----------------------------------------------------------------------------------------------------------------------------------------------------------------------------------------------------------------------------------------------------------|-------|-------|-------|-------|
| 145.3                           | 6-interacting protein [Sus scrofa]                                                                                                                                                                                                                       |       |       |       |       |
| gi 343478174 ref NP_001230356.1 | T-complex protein 1 subunit alpha [Sus scrofa]                                                                                                                                                                                                           | 1.601 | 0.881 | 1.189 | 1.637 |
| gi 335282824 ref XP_003123501.2 | PREDICTED: ilvB (bacterial acetolactate synthase)-like [Sus scrofa]                                                                                                                                                                                      | 0.942 | 0.825 | 0.694 | 0.805 |
| gi 345507389 gb AEO00192.1      | mucin 13A [Sus scrofa]                                                                                                                                                                                                                                   | 0.3   | 0.499 | 0.463 | 0.521 |
| gi 345507392 gb AEO00194.1      | mucin 13A [Sus scrofa] >gi 345507386 gb AEO00190.1  mucin 13A [Sus scrofa]                                                                                                                                                                               |       |       |       |       |
| gi 163310773 ref NP_001090990.2 | membrane-associated progesterone receptor component 2 [Sus scrofa] >gi 160688702 gb ABX45133.1  progesterone receptor membrane component 2 [Sus scrofa] >gi 160688700 gb ABX45132.1  progesterone receptor membrane component 2 [Sus scrofa]             | 0.546 | 0.683 | 0.9   | 0.82  |
| gi 350586183 ref XP_003128050.3 | PREDICTED: enoyl-CoA hydratase domain-containing protein 2, mitochondrial-like isoform 1 [Sus scrofa]                                                                                                                                                    | 1.14  | 0.512 | 0.439 | 0.738 |
| gi 281427370 ref NP_001163993.1 | T-complex protein 1 subunit eta [Sus scrofa] >gi 262036937 dbj BAI47603.1  chaperonin containing TCP1, subunit 7 (eta) [Sus scrofa]                                                                                                                      | 1.904 | 0.901 | 0.911 | 1.878 |
| gi 194037681 ref XP_001926390.1 | PREDICTED: early endosome antigen 1 [Sus scrofa]                                                                                                                                                                                                         | 0.749 | 1.226 | 1.334 | 0.818 |
| gi 349732201 ref NP_001231854.1 | dpy-30 homolog [Sus scrofa]                                                                                                                                                                                                                              | 0.546 | 1.038 | 2.141 | 2.438 |
| gi 47523892 ref NP_999584.1     | epithelial cell adhesion molecule precursor [Sus scrofa] >gi 75045149 sp Q75QW1.1 EPCAM_PIG RecName: Full=Epithelial cell adhesion molecule; Short=Ep-CAM; AltName: Full=Tumor-associated calcium signal transducer 1; AltName: CD_antigen=CD326; Flags: | 0.935 | 0.504 | 0.553 | 0.642 |
| gi 311248247 ref XP_003123039.1 | PREDICTED: ATP synthase subunit delta, mitochondrial-like isoform 1 [Sus scrofa]                                                                                                                                                                         | 0.28  | 0.385 | 0.346 | 0.274 |

|                                 |                                                                                                                                                                                                                                                         |       |       |       |       |
|---------------------------------|---------------------------------------------------------------------------------------------------------------------------------------------------------------------------------------------------------------------------------------------------------|-------|-------|-------|-------|
| gi 350580769 ref XP_003480894.1 | PREDICTED: ATP synthase subunit delta, mitochondrial-like [Sus scrofa]                                                                                                                                                                                  |       |       |       |       |
| gi 350591788 ref XP_003358782.2 | PREDICTED: hypothetical protein LOC448846 [Sus scrofa]                                                                                                                                                                                                  | 1.439 | 0.714 | 0.869 | 0.874 |
| gi 311250071 ref XP_003123947.1 | PREDICTED: solute carrier family 12 member 2 [Sus scrofa]                                                                                                                                                                                               | ---   | ---   | ---   | ---   |
| gi 132574 sp P10775.1 RINI_PIG  | RecName: Full=Ribonuclease inhibitor; AltName: Full=Ribonuclease/angiogenin inhibitor 1                                                                                                                                                                 | 1.696 | 1.691 | 0.941 | 1.56  |
| gi 313507173 pdb 1DFJ I         | Chain I, Ribonuclease Inhibitor Complexed With Ribonuclease A >gi 253723219 pdb 2BNH A Chain A, Porcine Ribonuclease Inhibitor                                                                                                                          |       |       |       |       |
| gi 48675943 ref NP_001001640.1  | amine oxidase [flavin-containing] A [Sus scrofa] >gi 62899648 sp Q6Q2J0.1 A OFA_PIG RecName: Full=Amine oxidase [flavin-containing] A; AltName: Full=Monoamine oxidase type A; Short=MAO-A >gi 45551418 gb AAS68020.1  monoamine oxidase A [Sus scrofa] | 0.908 | 0.565 | 0.663 | 1.069 |
| gi 350592964 ref XP_003483582.1 | PREDICTED: PDZ and LIM domain protein 1 [Sus scrofa]                                                                                                                                                                                                    | 1.389 | 2.467 | 2.281 | 1.529 |
| gi 62529273 gb AAX84942.1       | type III calpastatin [Sus scrofa]                                                                                                                                                                                                                       | 0.743 | 1.941 | 2.387 | 1.443 |
| gi 160425376 gb ABX39530.1      | calpastatin [Sus scrofa]                                                                                                                                                                                                                                |       |       |       |       |
| gi 160425375 gb ABX39529.1      | calpastatin [Sus scrofa]                                                                                                                                                                                                                                |       |       |       |       |
| gi 47522950 ref NP_999232.1     | calpastatin [Sus scrofa] >gi 44990121 gb AAS50179.1  calpastatin [Sus scrofa]                                                                                                                                                                           |       |       |       |       |
| gi 160425379 gb ABX39533.1      | calpastatin [Sus scrofa]                                                                                                                                                                                                                                |       |       |       |       |
| gi 124109 sp P12675.1 ICAL_PIG  | RecName: Full=Calpastatin; AltName: Full=Calpain inhibitor >gi 39545760 gb AAR27961.1  calpastatin [Sus scrofa] >gi 164407 gb AAA31012.1  heart calpastatin [Sus scrofa]                                                                                |       |       |       |       |

|                                  |                                                                                                                                                                                                                                                  |       |       |       |       |
|----------------------------------|--------------------------------------------------------------------------------------------------------------------------------------------------------------------------------------------------------------------------------------------------|-------|-------|-------|-------|
| gi 160425377 gb ABX39531.1       | calpastatin [Sus scrofa]                                                                                                                                                                                                                         |       |       |       |       |
| gi 160425378 gb ABX39532.1       | calpastatin [Sus scrofa]                                                                                                                                                                                                                         |       |       |       |       |
| gi 345091067 ref NP_001230751.1  | aldo-keto reductase family 7, member A2 (aflatoxin aldehyde reductase) [Sus scrofa]                                                                                                                                                              | 1.684 | 1.225 | 1.113 | 1.685 |
| gi 350590384 ref XP_003131576.3  | PREDICTED: importin subunit beta-1-like isoform 1 [Sus scrofa]                                                                                                                                                                                   | 1.133 | 0.693 | 0.653 | 0.91  |
| gi 148232214 ref NP_001090964.1  | ribose-5-phosphate isomerase [Sus scrofa] >gi 158512830 sp A2TLM1.1  RPIA_PIG RecName: Full=Ribose-5-phosphate isomerase; AltName: Full=Phosphoriboisomerase >gi 124265188 gb ABM98101.1  ribose 5-phosphate isomerase-like protein [Sus scrofa] | 0.938 | 3.291 | 3.682 | 1.253 |
| gi 311275469 ref XP_003134753.1  | PREDICTED: calumenin isoform 2 [Sus scrofa]                                                                                                                                                                                                      | 0.129 | 1.092 | 0.556 | 0.512 |
| gi 1346670 sp P04175.2 NCP_R_PIG | RecName: Full=NADPH--cytochrome P450 reductase; Short=CPR; Short=P450R                                                                                                                                                                           | 0.722 | 0.432 | 0.709 | 0.752 |
| gi 194018678 ref NP_001123431.1  | NADPH--cytochrome P450 reductase [Sus scrofa] >gi 499862 gb AAA85368.1  NADPH-cytochrome P-450 oxidoreductase [Sus scrofa]                                                                                                                       |       |       |       |       |
| gi 194035831 ref XP_001928742.1  | PREDICTED: coatomer subunit alpha isoform 2 [Sus scrofa]                                                                                                                                                                                         | 1.561 | 1.003 | 0.878 | 1.562 |
| gi 194035835 ref XP_001928732.1  | PREDICTED: coatomer subunit alpha isoform 1 [Sus scrofa]                                                                                                                                                                                         |       |       |       |       |
| gi 350579323 ref XP_003122006.3  | PREDICTED: retinal dehydrogenase 1-like, partial [Sus scrofa]                                                                                                                                                                                    | 1.35  | 1.241 | 1.953 | 1.515 |
| gi 194044922 ref XP_001927475.1  | PREDICTED: ADP/ATP translocase 2 [Sus scrofa]                                                                                                                                                                                                    | 0.806 | 0.269 | 0.464 | 0.69  |
| gi 350579921 ref XP_003353801.2  | PREDICTED: dipeptidyl peptidase 3-like isoform 1 [Sus scrofa] >gi 335281448 ref XP_003353806.1  PREDICTED: dipeptidyl peptidase 3-like [Sus scrofa]                                                                                              | 1.859 | 1.16  | 1.027 | 2.216 |
| gi 350579923 ref XP_003480       | PREDICTED: dipeptidyl peptidase                                                                                                                                                                                                                  |       |       |       |       |

|                                      |                                                                                                                                                                                                                                                           |       |       |       |       |
|--------------------------------------|-----------------------------------------------------------------------------------------------------------------------------------------------------------------------------------------------------------------------------------------------------------|-------|-------|-------|-------|
| 715.1                                | 3-like isoform 2 [Sus scrofa]                                                                                                                                                                                                                             |       |       |       |       |
| gi 18699303 gb AAL78518.1 AF464056_1 | MHC class I antigen [Sus scrofa]                                                                                                                                                                                                                          | ---   | ---   | ---   | ---   |
| gi 29027455 gb AAO62097.1            | MHC class I antigen [Sus scrofa]                                                                                                                                                                                                                          |       |       |       |       |
| gi 168208432 gb ACA21801.1           | MHC class I antigen [Sus scrofa]                                                                                                                                                                                                                          |       |       |       |       |
| gi 347300323 ref NP_001231460.1      | thioredoxin-dependent peroxide reductase, mitochondrial [Sus scrofa]                                                                                                                                                                                      | 0.606 | 0.676 | 0.513 | 0.331 |
| gi 350588020 ref XP_003357153.2      | PREDICTED: protein transport protein Sec31A [Sus scrofa]                                                                                                                                                                                                  | 1.508 | 0.744 | 0.93  | 1.055 |
| gi 194595733 gb ACF77144.1           | clathrin light chain (CLTA) protein [Sus scrofa]                                                                                                                                                                                                          | 2.514 | 2.008 | 3.157 | 1.538 |
| gi 47523670 ref NP_999471.1          | peroxisomal multifunctional enzyme type 2 [Sus scrofa] >gi 499340 emb CAA55037.1 17beta-estradiol dehydrogenase [Sus scrofa]                                                                                                                              | 1.407 | 1.131 | 1.217 | 1.501 |
| gi 1702997 sp P54613.1 2AAB_PIG      | RecName: Full=Serine/threonine-protein phosphatase 2A 65 kDa regulatory subunit A beta isoform; AltName: Full=PP2A subunit A isoform PR65-beta; AltName: Full=PP2A subunit A isoform R1-beta >gi 510347 emb CAA84403.1  protein phosphatase 2A 65 kDa reg | ---   | ---   | ---   | ---   |
| gi 335294859 ref XP_003357335.1      | PREDICTED: serine/threonine-protein phosphatase 2A 65 kDa regulatory subunit A beta isoform isoform 3 [Sus scrofa]                                                                                                                                        |       |       |       |       |
| gi 335294855 ref XP_003357333.1      | PREDICTED: serine/threonine-protein phosphatase 2A 65 kDa regulatory subunit A beta isoform isoform 1 [Sus scrofa]                                                                                                                                        |       |       |       |       |
| gi 335294861 ref XP_003357336.1      | PREDICTED: serine/threonine-protein phosphatase 2A 65 kDa regulatory subunit A beta isoform isoform 4 [Sus scrofa]                                                                                                                                        |       |       |       |       |
| gi 335294857 ref XP_003357334.1      | PREDICTED: serine/threonine-protein phosphatase 2A 65 kDa regulatory subunit A beta isoform isoform 2 [Sus scrofa]                                                                                                                                        |       |       |       |       |

|                                 |                                                                                                                                                                                                                                                               |       |       |       |       |
|---------------------------------|---------------------------------------------------------------------------------------------------------------------------------------------------------------------------------------------------------------------------------------------------------------|-------|-------|-------|-------|
| gi 80971504 ref NP_00103223.1   | 40S ribosomal protein SA [Sus scrofa] >gi 122069666 sp Q4GWZ2.3 <br>RSSA_PIG RecName: Full=40S ribosomal protein SA; AltName: Full=37 kDa laminin receptor precursor; Short=37LRP; AltName: Full=37/67 kDa laminin receptor; Short=LRP/LR; AltName: Full=67 k | 2.076 | 1.036 | 0.727 | 1.462 |
| gi 335302965 ref XP_001925033.2 | PREDICTED: lupus La protein homolog [Sus scrofa]                                                                                                                                                                                                              | 1.032 | 0.677 | 0.571 | 1.326 |
| gi 319401915 ref NP_001188313.1 | rho GDP-dissociation inhibitor 1 [Sus scrofa] >gi 315321426 gb ADU04840.1  Rho GDP dissociation inhibitor alpha [Sus scrofa]                                                                                                                                  | 2.584 | 0.973 | 1.127 | 1.81  |
| gi 350580873 ref XP_003123770.3 | PREDICTED: ras GTPase-activating-like protein IQGAP2-like [Sus scrofa]                                                                                                                                                                                        | 0.937 | 0.761 | 0.636 | 0.979 |
| gi 343780950 ref NP_001230488.1 | 39S ribosomal protein L40, mitochondrial isoform 1 [Sus scrofa]                                                                                                                                                                                               | 0.573 | 0.577 | 0.466 | 0.63  |
| gi 343780952 ref NP_001230489.1 | 39S ribosomal protein L40, mitochondrial [Sus scrofa]                                                                                                                                                                                                         |       |       |       |       |
| gi 350595262 ref XP_003484071.1 | PREDICTED: calumenin [Sus scrofa]                                                                                                                                                                                                                             | 0.635 | 0.71  | 0.802 | 0.56  |
| gi 305855176 ref NP_001182260.1 | cleavage and polyadenylation specificity factor subunit 6 [Sus scrofa] >gi 285818464 gb ADC38905.1  cleavage and polyadenylation specific factor 6 [Sus scrofa]                                                                                               | 0.757 | 1.403 | 1.44  | 0.672 |
| gi 311254645 ref XP_003125912.1 | PREDICTED: EPS8-like 3 [Sus scrofa]                                                                                                                                                                                                                           | 0.87  | 0.538 | 0.696 | 0.824 |
| gi 311273235 ref XP_003133777.1 | PREDICTED: intestinal-type alkaline phosphatase-like isoform 2 [Sus scrofa]                                                                                                                                                                                   | 0.879 | 1.307 | 2.392 | 0.652 |
| gi 311257294 ref XP_003127050.1 | PREDICTED: cytochrome b-c1 complex subunit Rieske, mitochondrial-like [Sus scrofa]                                                                                                                                                                            | 0.723 | 0.545 | 0.722 | 0.632 |
| gi 335304027 ref XP_003134070.2 | PREDICTED: 28S ribosomal protein S36, mitochondrial-like [Sus scrofa]                                                                                                                                                                                         | 0.469 | 0.658 | 0.771 | 0.704 |
| gi 350587377 ref XP_003356918.2 | PREDICTED: cytosol aminopeptidase-like [Sus scrofa]                                                                                                                                                                                                           | 1.687 | 2.747 | 3.579 | 1.011 |
| gi 335284301 ref XP_003354567.1 | PREDICTED: T-complex protein 1 subunit zeta-like isoform 2 [Sus                                                                                                                                                                                               | 2.957 | 1.74  | 1.338 | 2.699 |

|                                 |                                                                                                                                                                                                                                                           |       |       |       |       |
|---------------------------------|-----------------------------------------------------------------------------------------------------------------------------------------------------------------------------------------------------------------------------------------------------------|-------|-------|-------|-------|
|                                 | scrofa]                                                                                                                                                                                                                                                   |       |       |       |       |
| gi 335284299 ref XP_003124509.2 | PREDICTED: T-complex protein 1 subunit zeta-like isoform 1 [Sus scrofa]                                                                                                                                                                                   |       |       |       |       |
| gi 335281222 ref XP_003353764.1 | PREDICTED: probable 2-ketogluconate reductase-like isoform 2 [Sus scrofa]                                                                                                                                                                                 | 2.964 | 2.138 | 1.42  | 2.895 |
| gi 335281224 ref XP_001924750.3 | PREDICTED: probable 2-ketogluconate reductase-like isoform 1 [Sus scrofa]                                                                                                                                                                                 |       |       |       |       |
| gi 164543 gb AAA31072.1         | malate dehydrogenase (EC 1.1.1.37), partial [Sus scrofa]                                                                                                                                                                                                  | 0.973 | 0.715 | 0.601 | 0.988 |
| gi 6226874 sp P11708.4 MDHC_PIG | RecName: Full=Malate dehydrogenase, cytoplasmic; AltName: Full=Cytosolic malate dehydrogenase >gi 47523114 ref NP_999039.1  malate dehydrogenase, cytoplasmic [Sus scrofa] >gi 1469402 gb AAC48610.1  cytosolic malate dehydrogenase [Sus scrofa]         |       |       |       |       |
| gi 5107783 pdb 5MDH A           | Chain A, Crystal Structure Of Ternary Complex Of Porcine Cytoplasmic Malate Dehydrogenase Alpha-Ketomalonate And Tnad At 2.4 Angstroms Resolution >gi 5107784 pdb 5MDH B Chain B, Crystal Structure Of Ternary Complex Of Porcine Cytoplasmic Malate Dehy |       |       |       |       |
| gi 350596594 ref XP_003484293.1 | PREDICTED: malate dehydrogenase, cytoplasmic-like [Sus scrofa]                                                                                                                                                                                            |       |       |       |       |
| gi 311247012 ref XP_003122436.1 | PREDICTED: epidermal growth factor receptor kinase substrate 8-like protein 2-like [Sus scrofa]                                                                                                                                                           | 0.712 | 1.308 | 1.067 | 0.98  |
| gi 83816981 ref NP_001033050.1  | proteasome subunit beta type-9 [Sus scrofa] >gi 311260176 ref XP_003128374.1  PREDICTED: proteasome subunit beta type-9-like [Sus scrofa] >gi 110276961 gb ABG57117.1  proteasome beta 9 subunit [Sus scrofa] >gi 83320492 gb ABC02872.1  proteasome beta | 1.175 | 1.396 | 1.46  | 1.491 |

|                                 |                                                                                                                                                                                                                                                           |       |       |       |       |
|---------------------------------|-----------------------------------------------------------------------------------------------------------------------------------------------------------------------------------------------------------------------------------------------------------|-------|-------|-------|-------|
| gi 147225181 emb CAN13313.1     | proteasome (prosome, macropain) subunit, beta type, 9 (large multifunctional protease 2) [Sus scrofa]                                                                                                                                                     |       |       |       |       |
| gi 116175259 ref NP_001070686.1 | heterogeneous nuclear ribonucleoprotein A1 [Sus scrofa] >gi 115371763 gb ABI96206.1  ROA1 [Sus scrofa]                                                                                                                                                    | 1.325 | 0.865 | 0.712 | 1.539 |
| gi 45479848 gb AAS66766.1       | histone H1.3-like protein [Sus scrofa]                                                                                                                                                                                                                    | 0.519 | 1.101 | 0.872 | 1.21  |
| gi 72535198 ref NP_001026962.1  | histone H1.3-like protein [Sus scrofa] >gi 45479846 gb AAS66765.1  histone H1.3-like protein [Sus scrofa]                                                                                                                                                 |       |       |       |       |
| gi 47522712 ref NP_999108.1     | pyridoxal kinase [Sus scrofa] >gi 67470293 sp O46560.1 PD XK_PIG RecName: Full=Pyridoxal kinase; AltName: Full=Pyridoxine kinase >gi 2773404 gb AAB96794.1  pyridoxal kinase [Sus scrofa]                                                                 | 0.708 | 0.261 | 0.275 | 0.245 |
| gi 194036227 ref XP_001929678.1 | PREDICTED: selenium-binding protein 1 [Sus scrofa]                                                                                                                                                                                                        | 1.132 | 1.756 | 2.005 | 1.465 |
| gi 350529411 ref NP_001231937.1 | proteasome (prosome, macropain) 26S subunit, ATPase, 2 [Sus scrofa]                                                                                                                                                                                       | 0.795 | 0.859 | 1.186 | 1.024 |
| gi 462384 sp P33198.1 IDHP_PIG  | RecName: Full=Isocitrate dehydrogenase [NADP], mitochondrial; Short=IDH; AltName: Full=ICD-M; AltName: Full=IDP; AltName: Full=NADP(+)-specific ICDH; AltName: Full=Oxalosuccinate decarboxylase; Flags: Precursor >gi 294223 gb AAA31089.1  NADPH-specif | 1.284 | 0.588 | 0.64  | 0.99  |
| gi 27065481 pdb 1LWD B          | Chain B, Crystal Structure Of Nadp-Dependent Isocitrate Dehydrogenase From Porcine Heart Mitochondria >gi 27065480 pdb 1LWD A Chain A, Crystal Structure Of Nadp-Dependent Isocitrate Dehydrogenase From Porcine Heart Mitochondria                       |       |       |       |       |
| gi 255683404 ref NP_001157479.1 | isocitrate dehydrogenase [NADP], mitochondrial [Sus scrofa]                                                                                                                                                                                               |       |       |       |       |

|                                 |                                                                                                              |       |       |       |       |
|---------------------------------|--------------------------------------------------------------------------------------------------------------|-------|-------|-------|-------|
| gi 311268489 ref XP_003132080.1 | PREDICTED: fatty aldehyde dehydrogenase-like [Sus scrofa]                                                    | 0.804 | 0.424 | 0.401 | 0.695 |
| gi 346644882 ref NP_001231113.1 | reticulocalbin 2, EF-hand calcium binding domain precursor [Sus scrofa]                                      | 0.68  | 0.644 | 0.763 | 0.748 |
| gi 350593970 ref XP_001925937.3 | PREDICTED: 26S proteasome non-ATPase regulatory subunit 1 [Sus scrofa]                                       | 0.88  | 1.075 | 1.463 | 1.26  |
| gi 297307133 ref NP_001171997.1 | protein canopy homolog 2 precursor [Sus scrofa]                                                              | 0.75  | 1.048 | 1.338 | 0.943 |
| gi 349732227 ref NP_001231859.1 | heterogeneous nuclear ribonucleoprotein M [Sus scrofa]                                                       | 0.574 | 0.507 | 0.477 | 0.618 |
| gi 350587641 ref XP_003129114.3 | PREDICTED: UDP-glucuronosyltransferase 2C1-like [Sus scrofa]                                                 | 0.934 | 0.43  | 0.67  | 0.942 |
| gi 335282758 ref XP_003123386.2 | PREDICTED: UV excision repair protein RAD23 homolog A-like [Sus scrofa]                                      | 0.577 | 1.518 | 1.899 | 0.832 |
| gi 51493747 gb AAU04861.1       | enoyl-Coenzyme A hydratase/3-hydroxyacyl Coenzyme A [Sus scrofa]                                             | 1.749 | 1.377 | 1.622 | 1.487 |
| gi 351738777 gb AEQ61487.1      | ribokinase [Sus scrofa]                                                                                      | 1.083 | 1.493 | 1.603 | 1.019 |
| gi 311260951 ref XP_003128591.1 | PREDICTED: dehydrogenase/reductase SDR family member 1-like [Sus scrofa]                                     | 0.695 | 0.789 | 0.682 | 1.04  |
| gi 194038973 ref XP_001929258.1 | PREDICTED: purine nucleoside phosphorylase [Sus scrofa]                                                      | 1.05  | 0.89  | 0.952 | 0.937 |
| gi 350595461 ref XP_003134939.3 | PREDICTED: LOW QUALITY PROTEIN: 2-oxoglutarate dehydrogenase, mitochondrial-like [Sus scrofa]                | 0.912 | 0.602 | 0.409 | 0.891 |
| gi 178056556 ref NP_001116620.1 | probable aminopeptidase NPEPL1 [Sus scrofa] >gi 147223400 emb CAN13197.1  aminopeptidase-like 1 [Sus scrofa] | 1.378 | 2.15  | 2.596 | 0.755 |
| gi 311253799 ref XP_001926739.2 | PREDICTED: ras-related protein Rab-2A [Sus scrofa]                                                           | 1.027 | 0.39  | 0.427 | 0.617 |
| gi 350596433 ref XP_003484271.1 | PREDICTED: PDZ and LIM domain protein 1-like [Sus scrofa]                                                    | 0.669 | 0.927 | 1.06  | 0.662 |
| gi 335290692 ref XP_003356      | PREDICTED: UDP-glucose                                                                                       | 0.766 | 0.24  | 0.268 | 0.393 |



|                                   |                                                                                                                                                                                                                                                           |       |       |       |       |
|-----------------------------------|-----------------------------------------------------------------------------------------------------------------------------------------------------------------------------------------------------------------------------------------------------------|-------|-------|-------|-------|
| 250.1                             | 4-epimerase [Sus scrofa]                                                                                                                                                                                                                                  |       |       |       |       |
| gi 350589440 ref XP_003130687.3   | PREDICTED: Golgi membrane protein 1-like [Sus scrofa]                                                                                                                                                                                                     | 0.268 | 0.679 | 0.831 | 0.666 |
| gi 343098455 ref NP_001230202.1   | ras-related protein Rab-6A [Sus scrofa]                                                                                                                                                                                                                   | 1.156 | 0.719 | 0.616 | 0.97  |
| gi 343488534 ref NP_001230423.1   | homeobox prox 1 [Sus scrofa]                                                                                                                                                                                                                              | 1.246 | 1.094 | 1.062 | 0.853 |
| gi 335285943 ref XP_003354987.1   | PREDICTED: eukaryotic translation initiation factor 5A-1-like [Sus scrofa] >gi 311268294 ref XP_003131981.1  PREDICTED: eukaryotic translation initiation factor 5A-1-like isoform 4 [Sus scrofa] >gi 311268290 ref XP_003131978.1  PREDICTED: eukaryotic | 1.099 | 1.491 | 1.183 | 0.938 |
| gi 335283574 ref XP_003354345.1   | PREDICTED: transcriptional activator protein Pur-alpha isoform 2 [Sus scrofa] >gi 335283572 ref XP_003354344.1  PREDICTED: transcriptional activator protein Pur-alpha isoform 1 [Sus scrofa]                                                             | 0.921 | 1.144 | 1.289 | 0.939 |
| gi 350579350 ref XP_003353611.2   | PREDICTED: stomatin-like protein 2-like [Sus scrofa]                                                                                                                                                                                                      | 0.571 | 0.404 | 0.611 | 0.539 |
| gi 350592614 ref XP_003483500.1   | PREDICTED: splicing factor 3A subunit 1 isoform 1 [Sus scrofa]                                                                                                                                                                                            | 0.967 | 1.291 | 0.815 | 1.114 |
| gi 350591864 ref XP_001926353.4   | PREDICTED: LOW QUALITY PROTEIN: melanotransferrin [Sus scrofa]                                                                                                                                                                                            | 0.828 | 0.796 | 1.07  | 0.643 |
| gi 311254575 ref XP_003125894.1   | PREDICTED: rho-related GTP-binding protein RhoC-like [Sus scrofa]                                                                                                                                                                                         | 0.832 | 0.891 | 0.934 | 0.864 |
| gi 346986432 ref NP_001231366.1   | ras homolog gene family, member A [Sus scrofa]                                                                                                                                                                                                            |       |       |       |       |
| gi 75053043 sp Q6UAQ8.3 E TFB_PIG | RecName: Full=Electron transfer flavoprotein subunit beta; Short=Beta-ETF >gi 328550534 ref NP_001192208.1  electron transfer flavoprotein subunit beta [Sus scrofa] >gi 35384838 gb AAQ84565.1  electron transfer flavoprotein beta subunit precursor [S | 1.237 | 0.867 | 1.028 | 1.205 |
| gi 350580630 ref XP_003123        | PREDICTED: far upstream                                                                                                                                                                                                                                   | 0.981 | 1.596 | 1.271 | 1.194 |

|                                   |                                                                                                                                                                                                                                     |       |       |       |       |
|-----------------------------------|-------------------------------------------------------------------------------------------------------------------------------------------------------------------------------------------------------------------------------------|-------|-------|-------|-------|
| 158.3                             | element-binding protein 2-like [Sus scrofa]                                                                                                                                                                                         |       |       |       |       |
| gi 343478210 ref NP_001230371.1   | syntaxin 12 [Sus scrofa]                                                                                                                                                                                                            | 0.949 | 1.837 | 2.884 | 1.001 |
| gi 350591495 ref XP_003132454.3   | PREDICTED: coatomer subunit gamma [Sus scrofa]                                                                                                                                                                                      | 1.377 | 0.929 | 0.721 | 1.045 |
| gi 350582722 ref XP_003481338.1   | PREDICTED: 14-3-3 protein theta isoform 1 [Sus scrofa]                                                                                                                                                                              | 1.696 | 1.369 | 1.297 | 1.659 |
| gi 350582724 ref XP_003481339.1   | PREDICTED: 14-3-3 protein theta isoform 2 [Sus scrofa]                                                                                                                                                                              |       |       |       |       |
| gi 217039113 gb ACJ76845.1        | HDL binding protein [Sus scrofa]                                                                                                                                                                                                    | 0.968 | 0.866 | 0.691 | 0.902 |
| gi 345090979 ref NP_001230725.1   | NADH dehydrogenase (ubiquinone) Fe-S protein 3, 30kDa (NADH-coenzyme Q reductase) [Sus scrofa]                                                                                                                                      | 0.51  | 0.285 | 0.248 | 0.434 |
| gi 335310868 ref XP_003362230.1   | PREDICTED: T-complex protein 1 subunit epsilon, partial [Sus scrofa]                                                                                                                                                                | 1.491 | 0.598 | 0.472 | 1.125 |
| gi 334305778 sp D2SW95.1 COPB_PIG | RecName: Full=Coatomer subunit beta; AltName: Full=Beta-coat protein; Short=Beta-COP >gi 288860138 ref NP_001165837.1  coatomer subunit beta [Sus scrofa] >gi 268633765 gb ACZ15983.1  coatomer protein subunit beta 1 [Sus scrofa] | 1.192 | 0.661 | 0.623 | 0.916 |
| gi 12231040 sp Q29048.2 VATA_PIG  | RecName: Full=V-type proton ATPase catalytic subunit A; Short=V-ATPase subunit A; AltName: Full=V-ATPase 69 kDa subunit; AltName: Full=Vacuolar proton pump subunit alpha                                                           | 0.868 | 0.558 | 0.642 | 0.755 |
| gi 51592133 ref NP_001004042.1    | V-type proton ATPase catalytic subunit A [Sus scrofa] >gi 1968 emb CAA44213.1  H+ ATPase [Sus scrofa]                                                                                                                               |       |       |       |       |
| gi 116047849 gb ABJ53147.1        | glutathione S-transferase mu 2 [Sus scrofa]                                                                                                                                                                                         | 2.29  | 1.598 | 1.589 | 3.519 |
| gi 118403788 ref NP_001072152.1   | glutathione S-transferase mu 2 [Sus scrofa] >gi 116047847 gb ABJ53146.1  glutathione S-transferase mu 2 [Sus scrofa]                                                                                                                |       |       |       |       |

|                                 |                                                                                                                                                                                                                        |       |       |       |       |
|---------------------------------|------------------------------------------------------------------------------------------------------------------------------------------------------------------------------------------------------------------------|-------|-------|-------|-------|
| gi 350584479 ref XP_003126643.3 | PREDICTED: bcl-2-like protein 13 [Sus scrofa]                                                                                                                                                                          | 0.678 | 1.003 | 0.721 | 0.739 |
| gi 345100481 pdb 1C9P A         | Chain A, Complex Of Bdellastasin With Porcine Trypsin >gi 3318722 pdb 1AN1 E Chain E, Leech-Derived Tryptase InhibitorTRYPSIN COMPLEX                                                                                  | 0.612 | 0.894 | 0.765 | 0.701 |
| gi 311259162 ref XP_003127965.1 | PREDICTED: far upstream element-binding protein 1 [Sus scrofa]                                                                                                                                                         | 0.59  | 0.988 | 0.965 | 0.846 |
| gi 350586216 ref XP_003128039.3 | PREDICTED: thioredoxin domain-containing protein 12-like [Sus scrofa]                                                                                                                                                  | 0.456 | 1.098 | 1.272 | 1.059 |
| gi 197251946 ref NP_001127815.1 | actin-related protein 3 [Sus scrofa] >gi 195562215 gb ACG50179.1  actin-related protein 3-like protein [Sus scrofa]                                                                                                    | 1.498 | 1.237 | 1.031 | 1.763 |
| gi 136192 sp P09571.2 TRFE_PIG  | RecName: Full=Serotransferrin; Short=Transferrin; AltName: Full=Beta-1 metal-binding globulin; AltName: Full=Siderophilin >gi 18655907 pdb 1H76 A Chain A, The Crystal Structure Of Diferric Porcine Serum Transferrin | 0.803 | 0.46  | 0.442 | 0.476 |
| gi 350591529 ref XP_003483289.1 | PREDICTED: serotransferrin isoform 1 [Sus scrofa]                                                                                                                                                                      |       |       |       |       |
| gi 347582654 ref NP_001231582.1 | serotransferrin precursor [Sus scrofa] >gi 350591531 ref XP_003483290.1  PREDICTED: serotransferrin isoform 2 [Sus scrofa] >gi 189232884 emb CAQ34904.1  transferrin [Sus scrofa]                                      |       |       |       |       |
| gi 833800 emb CAA30943.1        | transferrin [Sus scrofa]                                                                                                                                                                                               |       |       |       |       |
| gi 335281104 ref XP_003353734.1 | PREDICTED: argininosuccinate synthase [Sus scrofa]                                                                                                                                                                     | 1.671 | 2.308 | 2.587 | 1.797 |
| gi 47523456 ref NP_999349.1     | serine/threonine-protein phosphatase PP1-beta catalytic subunit [Sus scrofa] >gi 47116968 sp P61292.3 PP1B_PIG RecName: Full=Serine/threonine-protein phosphatase PP1-beta catalytic subunit;                          | 1.843 | 1.251 | 1.257 | 1.937 |

|                                 |                                                                                                                                                                   |       |       |       |       |
|---------------------------------|-------------------------------------------------------------------------------------------------------------------------------------------------------------------|-------|-------|-------|-------|
|                                 | Short=PP-1B >gi 89257972 gb ABD65256.1  protein phosphatase                                                                                                       |       |       |       |       |
| gi 113205690 ref NP_001038024.1 | protein phosphatase 1 catalytic subunit alpha isoform [Sus scrofa] >gi 87621715 gb ABD38708.1  protein phosphatase 1 catalytic subunit alpha isoform [Sus scrofa] |       |       |       |       |
| gi 113205694 ref NP_001038025.1 | protein phosphatase 1 catalytic subunit gamma isoform [Sus scrofa] >gi 87621736 gb ABD38709.1  protein phosphatase 1 catalytic subunit gamma isoform [Sus scrofa] |       |       |       |       |
| gi 335300836 ref XP_003359054.1 | PREDICTED: ES1 protein homolog, mitochondrial-like [Sus scrofa]                                                                                                   | 0.485 | 1.208 | 0.769 | 1.133 |
| gi 335280672 ref XP_003353634.1 | PREDICTED: aldehyde dehydrogenase X, mitochondrial [Sus scrofa]                                                                                                   | 1.944 | 0.802 | 0.591 | 1.353 |
| gi 311258550 ref XP_003127676.1 | PREDICTED: EF-hand domain-containing protein D2-like [Sus scrofa]                                                                                                 | 0.429 | 0.804 | 0.768 | 0.614 |
| gi 335300581 ref XP_003358947.1 | PREDICTED: T-complex protein 1 subunit theta-like isoform 1 [Sus scrofa]                                                                                          | 1.545 | 0.974 | 0.794 | 1.863 |
| gi 335300583 ref XP_003358948.1 | PREDICTED: T-complex protein 1 subunit theta-like isoform 2 [Sus scrofa]                                                                                          |       |       |       |       |
| gi 335300585 ref XP_003358949.1 | PREDICTED: T-complex protein 1 subunit theta-like isoform 3 [Sus scrofa]                                                                                          |       |       |       |       |
| gi 47523680 ref NP_999472.1     | 10 kDa heat shock protein, mitochondrial [Sus scrofa] >gi 30525868 gb AAP32465.1  heat shock 10kD protein [Sus scrofa]                                            | 0.739 | 2.1   | 0.843 | 0.766 |
| gi 305855170 ref NP_001182250.1 | long-chain-fatty-acid--CoA ligase 5 [Sus scrofa] >gi 285818418 gb ADC38882.1  acyl-CoA synthetase long-chain family member 5 [Sus scrofa]                         | 0.82  | 0.53  | 0.574 | 0.782 |
| gi 350581487 ref XP_003124444.3 | PREDICTED: 14-3-3 protein gamma-like [Sus scrofa]                                                                                                                 | 2.892 | 1.76  | 1.578 | 2.189 |
| gi 350587966 ref XP_003482525.1 | PREDICTED: PDZ and LIM domain protein 5 isoform 3 [Sus scrofa]                                                                                                    | 0.779 | 1.597 | 1.479 | 1.14  |

|                                    |                                                                                                                                                                                                                                                           |       |       |       |       |
|------------------------------------|-----------------------------------------------------------------------------------------------------------------------------------------------------------------------------------------------------------------------------------------------------------|-------|-------|-------|-------|
| gi 311257850 ref XP_003127328.1    | PREDICTED:<br>17-beta-hydroxysteroid<br>dehydrogenase 14-like [Sus scrofa]                                                                                                                                                                                | 1.285 | 0.541 | 0.462 | 0.492 |
| gi 194043292 ref XP_001928111.1    | PREDICTED: 14-3-3 protein eta [Sus scrofa]                                                                                                                                                                                                                | 3.227 | 1.275 | 1.172 | 2.33  |
| gi 164507 gb AAA51295.1            | immunoglobulin gamma-chain [Sus scrofa]                                                                                                                                                                                                                   | 0.635 | 0.488 | 0.566 | 0.442 |
| gi 122131841 sp Q06A98.1 SRSF2_PIG | RecName: Full=Serine/arginine-rich splicing factor 2; AltName: Full=Splicing component, 35 kDa; AltName: Full=Splicing factor SC35; Short=SC-35; AltName: Full=Splicing factor, arginine/serine-rich 2 >gi 116175283 ref NP_001070697.1  serine/arginine- | 1.196 | 1.38  | 1.786 | 1.313 |
| gi 1921 emb CAA33169.1             | unnamed protein product [Sus scrofa]                                                                                                                                                                                                                      | 0.735 | 0.558 | 0.573 | 0.786 |
| gi 114313 sp P11607.1 AT2A2_PIG    | RecName: Full=Sarcoplasmic/endoplasmic reticulum calcium ATPase 2; Short=SERCA2; Short=SR Ca(2+)-ATPase 2; AltName: Full=Calcium pump 2; AltName: Full=Calcium-transporting ATPase sarcoplasmic reticulum type, slow twitch skeletal muscle isoform; AltN |       |       |       |       |
| gi 47522682 ref NP_999066.1        | propionyl-CoA carboxylase beta chain, mitochondrial precursor [Sus scrofa] >gi 6093657 sp P79384.1 PCCB_PIG RecName: Full=Propionyl-CoA carboxylase beta chain, mitochondrial; Short=PCCase subunit beta; AltName: Full=Propanoyl-CoA:carbon dioxide liga | 0.717 | 0.681 | 1.051 | 0.758 |
| gi 311272700 ref XP_003133549.1    | PREDICTED: heterogeneous nuclear ribonucleoprotein A3-like isoform 1 [Sus scrofa]                                                                                                                                                                         | 1.347 | 0.704 | 0.642 | 1.203 |
| gi 335303045 ref XP_003359613.1    | PREDICTED: heterogeneous nuclear ribonucleoprotein A3-like isoform 2 [Sus scrofa]                                                                                                                                                                         |       |       |       |       |
| gi 335291231 ref XP_003356440.1    | PREDICTED: desmoglein-2 [Sus scrofa]                                                                                                                                                                                                                      | 0.805 | 0.477 | 0.561 | 0.564 |

|                                     |                                                                                                                                                                                                                                                                                     |       |       |       |       |
|-------------------------------------|-------------------------------------------------------------------------------------------------------------------------------------------------------------------------------------------------------------------------------------------------------------------------------------|-------|-------|-------|-------|
| gi 116551 sp P04404.2 CMG<br>A_PIG  | RecName: Full=Chromogranin-A;<br>Short=CgA; Contains: RecName:<br>Full=Pancreastatin; Contains:<br>RecName: Full=Parastatin; Contains:<br>RecName: Full=WE-14; Flags:<br>Precursor >gi 164417 gb AAA31016.<br>1  chromogranin A precursor, partial<br>[Sus scrofa]                  | 0.486 | 0.982 | 0.552 | 0.599 |
| gi 341823654 ref NP_001157<br>477.2 | chromogranin-A precursor [Sus<br>scrofa]                                                                                                                                                                                                                                            |       |       |       |       |
| gi 335298834 ref XP_003358<br>406.1 | PREDICTED: leucine-rich repeat<br>flightless-interacting protein 2 [Sus<br>scrofa]                                                                                                                                                                                                  | 0.894 | 1.546 | 1.044 | 1.027 |
| gi 50916342 gb AAT88086.1           | heat shock protein 27kDa, partial<br>[Sus scrofa]                                                                                                                                                                                                                                   | 0.746 | 1.031 | 1.13  | 1.143 |
| gi 55926209 ref NP_0010075<br>19.1  | heat shock protein beta-1 [Sus<br>scrofa] >gi 75062102 sp Q5S1U1.1 H<br>SPB1_PIG RecName: Full=Heat<br>shock protein beta-1; Short=HspB1;<br>AltName: Full=Heat shock 27 kDa<br>protein; Short=HSP<br>27 >gi 335284212 ref XP_003354542<br>.1  PREDICTED: heat shock protein<br>bet |       |       |       |       |
| gi 335284210 ref XP_003354<br>541.1 | PREDICTED: heat shock protein<br>beta-1-like isoform 1 [Sus scrofa]                                                                                                                                                                                                                 |       |       |       |       |
| gi 311272309 ref XP_003133<br>393.1 | PREDICTED: ADP/ATP translocase<br>1-like isoform 2 [Sus scrofa]                                                                                                                                                                                                                     | ---   | ---   | ---   | ---   |
| gi 251823933 ref NP_001156<br>532.1 | cadherin-1 precursor [Sus<br>scrofa] >gi 209875157 gb ACI94878.<br>1  E-cadherin [Sus scrofa]                                                                                                                                                                                       | 0.515 | 1.117 | 1.208 | 0.636 |
| gi 350579011 ref XP_003121<br>807.3 | PREDICTED: acidic leucine-rich<br>nuclear phosphoprotein 32 family<br>member A-like [Sus scrofa]                                                                                                                                                                                    | 0.519 | 0.577 | 0.573 | 0.629 |
| gi 45479844 gb AAS66764.1           | histone H1.3-like protein [Sus scrofa]                                                                                                                                                                                                                                              | ---   | ---   | ---   | ---   |
| gi 68534962 ref NP_0010203<br>87.1  | histone H1.2-like protein [Sus<br>scrofa] >gi 66775665 gb AAY56388.<br>1  histone H1.2-like protein [Sus<br>scrofa]                                                                                                                                                                 |       |       |       |       |
| gi 45268981 gb AAS55903.1           | 60S ribosomal protein L12, partial<br>[Sus scrofa]                                                                                                                                                                                                                                  | 0.878 | 0.609 | 0.594 | 0.987 |
| gi 350579668 ref XP_003480<br>657.1 | PREDICTED: hypothetical protein<br>LOC414416 [Sus scrofa]                                                                                                                                                                                                                           |       |       |       |       |

|                                 |                                                                                                                                                                                                                                                           |       |       |       |       |
|---------------------------------|-----------------------------------------------------------------------------------------------------------------------------------------------------------------------------------------------------------------------------------------------------------|-------|-------|-------|-------|
| gi 350590640 ref XP_003131788.3 | PREDICTED: myosin-Id [Sus scrofa]                                                                                                                                                                                                                         | 0.75  | 0.444 | 0.53  | 0.597 |
| gi 264681430 ref NP_001161110.1 | 3-ketoacyl-CoA thiolase, mitochondrial [Sus scrofa] >gi 262036903 dbj BAI47587.1  acetyl-Coenzyme A acyltransferase 2 [Sus scrofa]                                                                                                                        | 1.383 | 0.591 | 0.719 | 0.56  |
| gi 335297068 ref XP_001927259.3 | PREDICTED: CLYBL protein [Sus scrofa]                                                                                                                                                                                                                     | 0.888 | 1.271 | 1.636 | 1.036 |
| gi 350593495 ref XP_003483700.1 | PREDICTED: LOW QUALITY PROTEIN: glycerol-3-phosphate dehydrogenase, mitochondrial [Sus scrofa]                                                                                                                                                            | 0.709 | 0.479 | 0.534 | 0.518 |
| gi 350588026 ref XP_003129409.3 | PREDICTED: heterogeneous nuclear ribonucleoprotein D-like, partial [Sus scrofa]                                                                                                                                                                           | 0.889 | 1.523 | 0.997 | 1.46  |
| gi 47523870 ref NP_999573.1     | peroxiredoxin-6 [Sus scrofa] >gi 75074817 sp Q9TSX9.3 P RDX6_PIG RecName: Full=Peroxiredoxin-6; AltName: Full=Non-selenium glutathione peroxidase; Short=NSGPx >gi 6689393 emb CAB65456.1  non-selenium glutathione phospholipid hydroperoxide peroxidase | 1.132 | 2.008 | 1.577 | 1.343 |
| gi 190360593 ref NP_001121945.1 | interferon-induced guanylate-binding protein 1 [Sus scrofa] >gi 166202346 gb ABY84597.1  guanylate binding protein 1 [Sus scrofa]                                                                                                                         | 0.933 | 0.844 | 0.731 | 1.258 |
| gi 2500494 sp Q29308.3 RS19_PIG | RecName: Full=40S ribosomal protein S19                                                                                                                                                                                                                   | 0.747 | 0.585 | 0.525 | 0.846 |
| gi 350585266 ref XP_003127229.3 | PREDICTED: 40S ribosomal protein S19-like isoform 1 [Sus scrofa] >gi 350585268 ref XP_003481921.1  PREDICTED: 40S ribosomal protein S19-like [Sus scrofa]                                                                                                 |       |       |       |       |
| gi 311267406 ref XP_003131549.1 | PREDICTED: gasdermin-B-like [Sus scrofa]                                                                                                                                                                                                                  | 1.558 | 1.337 | 1.747 | 2.213 |
| gi 47523724 ref NP_999497.1     | guanine nucleotide-binding protein subunit beta-2-like 1 [Sus scrofa] >gi 54037165 sp P63246.3 GB                                                                                                                                                         | 1.197 | 0.934 | 1.038 | 1.506 |

|                                 |                                                                                                                                                                           |       |       |       |       |
|---------------------------------|---------------------------------------------------------------------------------------------------------------------------------------------------------------------------|-------|-------|-------|-------|
|                                 | LP_PIG RecName: Full=Guanine nucleotide-binding protein subunit beta-2-like 1; AltName: Full=Receptor for activated C kinase; AltName: Full=Receptor of                   |       |       |       |       |
| gi 187373263 gb ACD03295.1      | ISG15 ubiquitin-like modifier [Sus scrofa]                                                                                                                                | 1.661 | 1.719 | 3.82  | 1.158 |
| gi 298104082 ref NP_001177109.1 | dynein light chain roadblock-type 1 [Sus scrofa]                                                                                                                          | 0.847 | 2.213 | 3.05  | 1.09  |
| gi 311266781 ref XP_003131241.1 | PREDICTED: galactokinase-like [Sus scrofa]                                                                                                                                | 1.426 | 0.926 | 0.906 | 1.083 |
| gi 350585425 ref XP_003127517.3 | PREDICTED: isochorismatase domain-containing protein 2, mitochondrial-like isoform 1, partial [Sus scrofa]                                                                | 0.409 | 1.462 | 1.207 | 0.534 |
| gi 346716265 ref NP_001231271.1 | omega-amidase NIT2 [Sus scrofa]                                                                                                                                           | 1.536 | 1.113 | 0.832 | 1.558 |
| gi 311260243 ref XP_001927987.2 | PREDICTED: protein CutA isoform 1 [Sus scrofa]                                                                                                                            | 0.621 | 2.449 | 1.975 | 0.951 |
| gi 335292054 ref XP_003356656.1 | PREDICTED: protein CutA [Sus scrofa]                                                                                                                                      |       |       |       |       |
| gi 335292058 ref XP_003356658.1 | PREDICTED: protein CutA [Sus scrofa]                                                                                                                                      |       |       |       |       |
| gi 335292056 ref XP_003356657.1 | PREDICTED: protein CutA [Sus scrofa]                                                                                                                                      |       |       |       |       |
| gi 37962872 gb AAR05785.1       | cytochrome c oxidase subunit 2 [Sus scrofa] >gi 162423271 gb ABX89412.1  cytochrome c oxidase subunit 2 [Sus scrofa]                                                      | 0.868 | 0.423 | 0.338 | 0.684 |
| gi 342316093 gb ABF56563.2      | cytochrome c oxidase subunit II [Sus scrofa]                                                                                                                              |       |       |       |       |
| gi 347802433 gb AEP22017.1      | cytochrome c oxidase subunit II (mitochondrion) [Potamochoerus porcus]                                                                                                    |       |       |       |       |
| gi 306485877 gb ABF49552.2      | cytochrome c oxidase subunit II [Sus scrofa]                                                                                                                              |       |       |       |       |
| gi 312233367 ref YP_004021578.1 | cytochrome c oxidase subunit II [Sus scrofa taiwanensis] >gi 317054710 ref YP_002600780.2  cytochrome c oxidase subunit II [Sus scrofa domesticus] >gi 124358980 ref YP_0 |       |       |       |       |



|                                 |                                                                                                                                                                                                                                                           |       |       |       |       |
|---------------------------------|-----------------------------------------------------------------------------------------------------------------------------------------------------------------------------------------------------------------------------------------------------------|-------|-------|-------|-------|
|                                 | 01023766.1  cytochrome c oxidase subunit II [Phacochoerus africanus] >gi 5835866                                                                                                                                                                          |       |       |       |       |
| gi 157056539 gb ABV02170.1      | cytochrome c oxidase subunit 2 [Sus scrofa]                                                                                                                                                                                                               |       |       |       |       |
| gi 145315754 gb ABP63291.1      | cytochrome c oxidase subunit II [Sus scrofa]                                                                                                                                                                                                              |       |       |       |       |
| gi 157056524 gb ABV02156.1      | cytochrome c oxidase subunit 2 [Sus scrofa]                                                                                                                                                                                                               |       |       |       |       |
| gi 45826173 gb AAS77694.1       | cytochrome c oxidase subunit 2 [Sus scrofa]                                                                                                                                                                                                               |       |       |       |       |
| gi 311252952 ref XP_003125350.1 | PREDICTED: ketohexokinase-like isoform 3 [Sus scrofa]                                                                                                                                                                                                     | 0.538 | 0.556 | 0.633 | 0.506 |
| gi 311252954 ref XP_003125348.1 | PREDICTED: ketohexokinase-like isoform 1 [Sus scrofa]                                                                                                                                                                                                     | ---   | ---   | ---   | ---   |
| gi 350592835 ref XP_003483550.1 | PREDICTED: protein transport protein Sec24C isoform 2 [Sus scrofa]                                                                                                                                                                                        |       |       |       |       |
| gi 2497487 sp Q29561.1 KCY_PIG  | RecName: Full=UMP-CMP kinase; AltName: Full=Cytidine monophosphate kinase; AltName: Full=Cytidylate kinase; AltName: Full=Deoxycytidylate kinase; AltName: Full=Uridine monophosphate kinase; AltName: Full=Uridine monophosphate/cytidine monophosphate  | 0.913 | 1.002 | 0.698 | 0.736 |
| gi 350586231 ref XP_003128059.3 | PREDICTED: UMP-CMP kinase-like [Sus scrofa]                                                                                                                                                                                                               |       |       |       |       |
| gi 335309657 ref XP_003361720.1 | PREDICTED: 14-3-3 protein epsilon-like [Sus scrofa]                                                                                                                                                                                                       | 1.488 | 0.899 | 0.78  | 1.393 |
| gi 350579445 ref XP_003480606.1 | PREDICTED: protein NipSnap homolog 3A-like [Sus scrofa]                                                                                                                                                                                                   | 0.842 | 1.427 | 1.801 | 0.984 |
| gi 640352 pdb 3MDE A            | Chain A, Crystal Structures Of Medium Chain Acyl-Coa Dehydrogenase From Pig Liver Mitochondria With And Without Substrate >gi 640350 pdb 3MDD A Chain A, Crystal Structures Of Medium Chain Acyl-Coa Dehydrogenase From Pig Liver Mitochondria With And W | 1.391 | 0.684 | 0.685 | 0.883 |

|                                        |                                                                                                                                                                                                                                                                                     |       |       |       |       |
|----------------------------------------|-------------------------------------------------------------------------------------------------------------------------------------------------------------------------------------------------------------------------------------------------------------------------------------|-------|-------|-------|-------|
| gi 148872486 sp P41367.3 A<br>CADM_PIG | RecName: Full=Medium-chain<br>specific acyl-CoA dehydrogenase,<br>mitochondrial; Short=MCAD; Flags:<br>Precursor >gi 56791886 gb AAW304<br>30.1  medium-chain acyl-coA<br>dehydrogenase [Sus scrofa]                                                                                |       |       |       |       |
| gi 40889737 pdb 1UDY D                 | Chain D, Medium-Chain Acyl-Coa<br>Dehydrogenase With<br>3-Thiaoctanoyl-Coa >gi 40889735 pd<br>b 1UDY B Chain B, Medium-Chain<br>Acyl-Coa Dehydrogenase With<br>3-Thiaoctanoyl-Coa >gi 40889736 pd<br>b 1UDY C Chain C, Medium-Chain<br>Acyl-Coa Dehydrogenase With<br>3-Thiaoctanoy |       |       |       |       |
| gi 47522898 ref NP_999204.1<br>        | medium-chain specific acyl-CoA<br>dehydrogenase, mitochondrial<br>precursor [Sus<br>scrofa] >gi 1127798 gb AAA83759.1 <br>medium-chain acyl-CoA<br>dehydrogenase [Sus scrofa]                                                                                                       |       |       |       |       |
| gi 325652098 ref NP_001191<br>688.1    | nucleoside diphosphate kinase A [Sus<br>scrofa]                                                                                                                                                                                                                                     | 0.73  | 1.65  | 1.102 | 0.703 |
| gi 194037373 ref XP_001927<br>584.1    | PREDICTED: coatomer subunit<br>zeta-1 isoform 1 [Sus scrofa]                                                                                                                                                                                                                        | 1.781 | 1.371 | 1.598 | 1.578 |
| gi 311244862 ref XP_001925<br>828.2    | PREDICTED: huntingtin-interacting<br>protein K-like [Sus scrofa]                                                                                                                                                                                                                    | 0.776 | 1.342 | 1.28  | 0.902 |
| gi 311277261 ref XP_003135<br>572.1    | PREDICTED: 55 kDa erythrocyte<br>membrane protein-like isoform 1 [Sus<br>scrofa]                                                                                                                                                                                                    | 0.801 | 0.558 | 0.535 | 0.811 |
| gi 47523516 ref NP_999381.1<br>        | inositol monophosphatase 1 [Sus<br>scrofa] >gi 68568737 sp O77591.1 IM<br>PA1_PIG RecName: Full=Inositol<br>monophosphatase 1; Short=IMP 1;<br>Short=IMPase 1; AltName:<br>Full=Inositol-1(or<br>4)-monophosphatase 1; AltName:<br>Full=Lithium-sensitive myo-inositol<br>monophos  | 1.006 | 2.592 | 2.528 | 1.676 |
| gi 194038734 ref XP_001929<br>226.1    | PREDICTED: protein transport<br>protein Sec23A isoform 2 [Sus<br>scrofa]                                                                                                                                                                                                            | 1.655 | 0.875 | 0.634 | 1.202 |
| gi 6435805 pdb 3HDH B                  | Chain B, Pig Heart Short Chain                                                                                                                                                                                                                                                      | 0.962 | 0.465 | 0.228 | 0.846 |

|                                 |                                                                                                                                                                                                                                                                                      |       |       |       |       |
|---------------------------------|--------------------------------------------------------------------------------------------------------------------------------------------------------------------------------------------------------------------------------------------------------------------------------------|-------|-------|-------|-------|
|                                 | L-3-Hydroxyacyl Coa<br>Dehydrogenase Revisited: Sequence<br>Analysis And Crystal Structure<br>Determination >gi 6435806 pdb 3HD<br>H C Chain C, Pig Heart Short Chain<br>L-3-Hydroxyacyl Coa<br>Dehydrogenase Revisited: Sequence<br>Analysis An                                     |       |       |       |       |
| gi 47523722 ref NP_999496.1     | hydroxyacyl-coenzyme A<br>dehydrogenase, mitochondrial<br>precursor [Sus<br>scrofa] >gi 7404364 sp P00348.2 HC<br>DH_PIG RecName:<br>Full=Hydroxyacyl-coenzyme A<br>dehydrogenase, mitochondrial;<br>Short=HCDH; AltName:<br>Full=Medium and short-chain<br>L-3-hydroxyacyl-coenzyme |       |       |       |       |
| gi 311275164 ref XP_003134601.1 | PREDICTED: amiloride-sensitive<br>amine oxidase [copper-containing]<br>[Sus scrofa]                                                                                                                                                                                                  | 0.807 | 0.699 | 0.984 | 0.858 |
| gi 164557 gb AAA31078.1         | MHC PD14 transplantation antigen<br>[Sus scrofa]                                                                                                                                                                                                                                     | 2.698 | 1.722 | 3.598 | 1.878 |
| gi 164558 gb AAA31079.1         | MHC PD14a transplantation antigen<br>[Sus scrofa]                                                                                                                                                                                                                                    |       |       |       |       |
| gi 47523822 ref NP_999549.1     | glutamate carboxypeptidase 2 [Sus<br>scrofa] >gi 20138100 sp O77564.1 FO<br>LH1_PIG RecName: Full=Glutamate<br>carboxypeptidase 2; AltName:<br>Full=Folate hydrolase 1; AltName:<br>Full=Folylpoly-gamma-glutamate<br>carboxypeptidase; Short=FGCP;<br>AltName: Full=Glutamate       | 1.112 | 2.071 | 2.577 | 1.21  |
| gi 116175265 ref NP_001070688.1 | regucalcin [Sus<br>scrofa] >gi 122131846 sp Q06AA3.1 <br>RGN_PIG RecName:<br>Full=Regucalcin; Short=RC;<br>AltName: Full=Gluconolactonase;<br>Short=GNL; AltName:<br>Full=Senescence marker protein 30;<br>Short=SMP-30 >gi 115371745 gb AB<br>I96197.1  SMP-30 [Sus scrofa]         | 1.624 | 1.934 | 2.09  | 1.639 |
| gi 335305927 ref XP_003360      | PREDICTED: regucalcin-like                                                                                                                                                                                                                                                           |       |       |       |       |

|                                 |                                                                                                                                   |       |       |       |       |
|---------------------------------|-----------------------------------------------------------------------------------------------------------------------------------|-------|-------|-------|-------|
| 333.1                           | isoform 2 [Sus scrofa] >gi 335305929 ref XP_003135107.2  PREDICTED: regucalcin-like isoform 1 [Sus scrofa]                        |       |       |       |       |
| gi 311248380 ref XP_003123108.1 | PREDICTED: cyclic AMP-responsive element-binding protein 3-like protein 3-like isoform 1 [Sus scrofa]                             | 1.073 | 0.511 | 0.489 | 0.485 |
| gi 311248382 ref XP_003123109.1 | PREDICTED: cyclic AMP-responsive element-binding protein 3-like protein 3-like isoform 2 [Sus scrofa]                             |       |       |       |       |
| gi 335299760 ref XP_003358667.1 | PREDICTED: neprilysin isoform 2 [Sus scrofa] >gi 311269573 ref XP_003132549.1  PREDICTED: neprilysin isoform 1 [Sus scrofa]       | 0.571 | 0.385 | 0.373 | 0.435 |
| gi 311258794 ref XP_003127785.1 | PREDICTED: sphingomyelin phosphodiesterase, acid-like 3B [Sus scrofa]                                                             | 0.849 | 1.649 | 1.632 | 0.918 |
| gi 11641132 gb AAG38247.1       | cyclophilin [Sus scrofa]                                                                                                          | ---   | ---   | ---   | ---   |
| gi 335282345 ref XP_003354038.1 | PREDICTED: mitochondrial import inner membrane translocase subunit Tim13-like [Sus scrofa]                                        | 1.78  | 2.187 | 2.239 | 1.616 |
| gi 345441801 ref NP_001230874.1 | TNF receptor-associated protein 1 [Sus scrofa]                                                                                    | 1.932 | 0.894 | 0.943 | 1.689 |
| gi 350539097 ref NP_001233144.1 | ubiquitin/ISG15-conjugating enzyme E2 L6 [Sus scrofa] >gi 332113317 gb AEE02035.1  ubiquitin-conjugating enzyme E2L6 [Sus scrofa] | 1.621 | 1.36  | 2.399 | 1.698 |
| gi 194036918 ref XP_001928194.1 | PREDICTED: thiosulfate sulfurtransferase/rhodanese-like domain-containing protein 1-like [Sus scrofa]                             | 0.678 | 2.719 | 2.204 | 1.842 |
| gi 350584866 ref XP_003355801.2 | PREDICTED: Golgi apparatus protein 1-like isoform 1 [Sus scrofa]                                                                  | 0.976 | 0.826 | 1.083 | 0.867 |
| gi 350584868 ref XP_003481837.1 | PREDICTED: Golgi apparatus protein 1-like isoform 2 [Sus scrofa]                                                                  |       |       |       |       |
| gi 194042126 ref XP_001928377.1 | PREDICTED: eukaryotic translation initiation factor 3 subunit A [Sus scrofa]                                                      | 0.9   | 1.082 | 0.968 | 1.434 |

|                                      |                                                                                                                                                                              |       |       |       |       |
|--------------------------------------|------------------------------------------------------------------------------------------------------------------------------------------------------------------------------|-------|-------|-------|-------|
| gi 194034199 ref XP_001928042.1      | PREDICTED: proteasome subunit alpha type-3 isoform 2 [Sus scrofa]                                                                                                            | 1.08  | 2.055 | 1.906 | 1.477 |
| gi 194034201 ref XP_001928025.1      | PREDICTED: proteasome subunit alpha type-3 isoform 1 [Sus scrofa]                                                                                                            |       |       |       |       |
| gi 21954744 gb AAM83105.1 AF525487_1 | Ran [Sus scrofa]                                                                                                                                                             | 1.757 | 0.822 | 0.618 | 1.618 |
| gi 194043605 ref XP_001925468.1      | PREDICTED: GTP-binding nuclear protein Ran [Sus scrofa]                                                                                                                      |       |       |       |       |
| gi 194038542 ref XP_001929208.1      | PREDICTED: methylmalonate-semialdehyde dehydrogenase [acylating], mitochondrial [Sus scrofa]                                                                                 | 1.593 | 0.928 | 0.929 | 1.458 |
| gi 322510017 sp Q007T2.2 CDC42_PIG   | RecName: Full=Cell division control protein 42 homolog; Flags: Precursor >gi 269994011 dbj BAI50642.1  Cell division control protein 42 homolog [Sus scrofa]                 | 1.125 | 0.764 | 0.921 | 1.172 |
| gi 346421347 ref NP_001231022.1      | glucosamine-6-phosphate isomerase 1 [Sus scrofa]                                                                                                                             | 0.958 | 1.649 | 1.438 | 1.064 |
| gi 335310032 ref XP_003126353.2      | PREDICTED: dynactin subunit 2-like isoform 3 [Sus scrofa]                                                                                                                    | 1.748 | 1.035 | 0.915 | 1.093 |
| gi 350584186 ref XP_003126370.2      | PREDICTED: dynactin subunit 2-like [Sus scrofa]                                                                                                                              |       |       |       |       |
| gi 311247963 ref XP_003122904.1      | PREDICTED: apoptosis inhibitor 5 isoform 1 [Sus scrofa]                                                                                                                      | 0.895 | 0.634 | 0.736 | 0.863 |
| gi 350594828 ref XP_003134450.3      | PREDICTED: charged multivesicular body protein 4b-like [Sus scrofa]                                                                                                          | 1.599 | 0.904 | 1.138 | 0.787 |
| gi 85542092 sp Q2YGT9.3 RL6_PIG      | RecName: Full=60S ribosomal protein L6 >gi 113205608 ref NP_001038007.1  60S ribosomal protein L6 [Sus scrofa] >gi 56384243 gb AAV85770.1  ribosomal protein L6 [Sus scrofa] | 0.806 | 0.295 | 0.432 | 0.89  |
| gi 335300802 ref XP_003359038.1      | PREDICTED: 6-phosphofructokinase, liver type-like [Sus scrofa]                                                                                                               | 1.026 | 0.859 | 0.933 | 1.51  |
| gi 239977642 sp Q29183.1 TFF3_PIG    | RecName: Full=Trefoil factor 3; AltName: Full=Intestinal trefoil factor; Flags: Precursor                                                                                    | 0.853 | 4.328 | 3.069 | 1.667 |
| gi 343478295 ref NP_001230412.1      | trefoil factor 3 (intestinal) precursor [Sus scrofa]                                                                                                                         |       |       |       |       |
| gi 350592195 ref XP_003483           | PREDICTED: trefoil factor 3-like,                                                                                                                                            |       |       |       |       |

|                                 |                                                                                                                                                                                                                                                           |       |       |       |       |
|---------------------------------|-----------------------------------------------------------------------------------------------------------------------------------------------------------------------------------------------------------------------------------------------------------|-------|-------|-------|-------|
| 413.1                           | partial [Sus scrofa]                                                                                                                                                                                                                                      |       |       |       |       |
| gi 262072939 dbj BAI47777.1     | CCHC-type zinc finger, nucleic acid binding protein [Sus scrofa]                                                                                                                                                                                          | 1.38  | 2.221 | 1.925 | 2.168 |
| gi 47523464 ref NP_999353.1     | dolichyl-diphosphooligosaccharide--protein glycosyltransferase 48 kDa subunit precursor [Sus scrofa] >gi 218511750 sp Q29381.2 OST48_PIG RecName: Full=Dolichyl-diphosphooligosaccharide--protein glycosyltransferase 48 kDa subunit; Short=DDOST 48 kDa  | 0.753 | 0.525 | 1.151 | 0.715 |
| gi 113205874 ref NP_001038071.1 | ATP synthase subunit O, mitochondrial precursor [Sus scrofa] >gi 122145941 sp Q2EN81.1 ATPO_PIG RecName: Full=ATP synthase subunit O, mitochondrial; AltName: Full=Oligomycin sensitivity conferral protein; Short=OSCP; Flags: Precursor >gi 87047636 gb | 1.062 | 0.495 | 0.536 | 0.661 |
| gi 311265228 ref XP_003130565.1 | PREDICTED: LOW QUALITY PROTEIN: bifunctional aminoacyl-tRNA synthetase [Sus scrofa]                                                                                                                                                                       | 0.783 | 0.898 | 0.846 | 1.048 |
| gi 350591601 ref XP_003132498.3 | PREDICTED: sodium/potassium-transporting ATPase subunit beta-3-like [Sus scrofa]                                                                                                                                                                          | 0.747 | 0.364 | 0.396 | 0.531 |
| gi 335309396 ref XP_003361623.1 | PREDICTED: adenylate kinase 2, mitochondrial-like isoform 1 [Sus scrofa]                                                                                                                                                                                  | 2.203 | 1.887 | 1.877 | 1.706 |
| gi 385862179 ref NP_001245364.1 | protein diaphanous homolog 1 [Sus scrofa]                                                                                                                                                                                                                 | 0.625 | 0.552 | 0.764 | 0.564 |
| gi 350587405 ref XP_003482406.1 | PREDICTED: cytosolic beta-glucosidase-like, partial [Sus scrofa]                                                                                                                                                                                          | 1.402 | 0.973 | 0.831 | 1.198 |
| gi 350597193 ref XP_003484383.1 | PREDICTED: LOW QUALITY PROTEIN: peptidyl-prolyl cis-trans isomerase B [Sus scrofa]                                                                                                                                                                        | 0.394 | 1.723 | 0.922 | 0.958 |
| gi 47523762 ref NP_999517.1     | plasma membrane calcium-transporting ATPase 1 [Sus scrofa] >gi 114319 sp P23220.1 AT2B1_PIG RecName: Full=Plasma                                                                                                                                          | 0.673 | 0.627 | 0.775 | 0.857 |

|                                 |                                                                                                                                          |       |       |       |       |
|---------------------------------|------------------------------------------------------------------------------------------------------------------------------------------|-------|-------|-------|-------|
|                                 | membrane calcium-transporting ATPase 1; Short=PMCA1; AltName: Full=Plasma membrane calcium pump isoform 1 >gi 2061 emb CAA37536.1  plasm |       |       |       |       |
| gi 194038540 ref XP_001929175.1 | PREDICTED: ectonucleoside triphosphate diphosphohydrolase 5 [Sus scrofa]                                                                 | 0.769 | 0.948 | 0.509 | 1.118 |
| gi 350579385 ref XP_001925894.4 | PREDICTED: glyoxylate reductase/hydroxypyruvate reductase [Sus scrofa]                                                                   | 0.895 | 0.493 | 0.623 | 0.64  |
| gi 343780941 ref NP_001230485.1 | prohibitin 2 [Sus scrofa]                                                                                                                | 1.815 | 0.803 | 0.787 | 1.352 |
| gi 311275457 ref XP_003134747.1 | PREDICTED: filamin-C isoform 1 [Sus scrofa]                                                                                              | ---   | ---   | ---   | ---   |
| gi 311275463 ref XP_003134750.1 | PREDICTED: filamin-C isoform 4 [Sus scrofa]                                                                                              |       |       |       |       |
| gi 335305357 ref XP_003360191.1 | PREDICTED: filamin-C [Sus scrofa]                                                                                                        |       |       |       |       |
| gi 311275461 ref XP_003134749.1 | PREDICTED: filamin-C isoform 3 [Sus scrofa]                                                                                              |       |       |       |       |
| gi 311275459 ref XP_003134748.1 | PREDICTED: filamin-C isoform 2 [Sus scrofa]                                                                                              |       |       |       |       |
| gi 164505 gb AAA51294.1         | immunoglobulin gamma-chain, partial [Sus scrofa]                                                                                         | 0.237 | 0.099 | 0.217 | 0.183 |
| gi 433128 gb AAA52219.1         | Ig gamma 1a chain constant region [Sus scrofa] >gi 2136515 pir  I47161<br>Ig gamma 3 chain constant region - pig (fragment)              |       |       |       |       |
| gi 47523192 ref NP_998993.1     | IgG heavy chain precursor [Sus scrofa] >gi 5052050 gb AAD38418.1  AF062384_1 IgG heavy chain precursor [Sus scrofa]                      |       |       |       |       |
| gi 159138024 gb ABW89018.1      | immunoglobulin heavy chain gamma constant region [Sus scrofa]                                                                            |       |       |       |       |
| gi 433122 gb AAA52216.1         | Ig gamma 1b chain constant region [Sus scrofa] >gi 2136512 pir  I47158<br>Ig gamma 1 chain constant region - pig (fragment)              |       |       |       |       |
| gi 227130 prf  1614425A         | chymodenin                                                                                                                               | 0.452 | 0.325 | 0.286 | 0.294 |
| gi 311262177 ref XP_003129051.1 | PREDICTED: electron transfer flavoprotein-ubiquinone                                                                                     | 0.626 | 0.679 | 0.626 | 0.498 |

|                                   |                                                                                                                                                           |       |       |       |       |
|-----------------------------------|-----------------------------------------------------------------------------------------------------------------------------------------------------------|-------|-------|-------|-------|
|                                   | oxidoreductase, mitochondrial-like [Sus scrofa]                                                                                                           |       |       |       |       |
| gi 197251934 ref NP_001127826.1   | actin-related protein 2 [Sus scrofa] >gi 195562213 gb ACG50178.1  actin-related protein 2-like protein [Sus scrofa]                                       | 1.397 | 0.5   | 0.574 | 1.417 |
| gi 78172717 gb ABB29449.1         | transporter associated with antigen processing 1 [Sus scrofa]                                                                                             | 0.541 | 0.382 | 0.447 | 0.711 |
| gi 350586535 ref XP_003128377.3   | PREDICTED: antigen peptide transporter 1 isoform 1 [Sus scrofa]                                                                                           |       |       |       |       |
| gi 147225183 emb CAN13315.1       | transporter 1, ATP-binding cassette, sub-family B (MDR/TAP) [Sus scrofa]                                                                                  |       |       |       |       |
| gi 113205778 ref NP_001038046.1   | antigen peptide transporter 1 [Sus scrofa] >gi 78172715 gb ABB29448.1  transporter associated with antigen processing 1 [Sus scrofa]                      |       |       |       |       |
| gi 311252239 ref XP_003124992.1   | PREDICTED: all-trans-retinol 13,14-reductase [Sus scrofa]                                                                                                 | 0.52  | 0.2   | 0.307 | 0.231 |
| gi 335293373 ref XP_003356947.1   | PREDICTED: UDP-glucose 6-dehydrogenase-like isoform 1 [Sus scrofa]                                                                                        | 1.734 | 1.612 | 1.136 | 1.981 |
| gi 350580651 ref XP_003480867.1   | PREDICTED: scaffold attachment factor B1-like isoform 2 [Sus scrofa]                                                                                      | 0.687 | 1.076 | 0.762 | 0.763 |
| gi 350580653 ref XP_003354065.2   | PREDICTED: scaffold attachment factor B1-like isoform 1 [Sus scrofa]                                                                                      |       |       |       |       |
| gi 194041736 ref XP_001927852.1   | PREDICTED: fucose mutarotase isoform 1 [Sus scrofa]                                                                                                       | 2.396 | 1.735 | 1.948 | 1.845 |
| gi 311272085 ref XP_003133293.1   | PREDICTED: fucose mutarotase isoform 2 [Sus scrofa]                                                                                                       |       |       |       |       |
| gi 194038586 ref XP_001926746.1   | PREDICTED: transmembrane emp24 domain-containing protein 10 [Sus scrofa]                                                                                  | 0.582 | 0.399 | 0.461 | 0.628 |
| gi 72535208 ref NP_001026966.1    | 2~-5~-oligoadenylate synthase 2 [Sus scrofa] >gi 45594389 gb AAQ22351.1  2~-5~- oligoadenylate synthetase 2 [Sus scrofa]                                  | 1.025 | 0.661 | 0.815 | 0.993 |
| gi 85687558 sp Q4A3R3.1 DMBT1_PIG | RecName: Full=Deleted in malignant brain tumors 1 protein; AltName: Full=Hensin; Flags: Precursor >gi 73531021 emb CAJ27171.1  DMBT1 protein [Sus scrofa] | 0.397 | 0.523 | 0.555 | 0.462 |



|                                   |                                                                                                                                                                                                                                                          |       |       |       |       |
|-----------------------------------|----------------------------------------------------------------------------------------------------------------------------------------------------------------------------------------------------------------------------------------------------------|-------|-------|-------|-------|
| gi 114703738 ref NP_001041653.1   | deleted in malignant brain tumors 1 protein precursor [Sus scrofa] >gi 110431268 emb CAJ14977.1  deleted in malignant brain tumors 1 protein [Sus scrofa]                                                                                                |       |       |       |       |
| gi 311246094 ref XP_001924927.2   | PREDICTED: acidic leucine-rich nuclear phosphoprotein 32 family member B [Sus scrofa]                                                                                                                                                                    | 0.936 | 0.598 | 0.775 | 1.029 |
| gi 298104076 ref NP_001177104.1   | enoyl-CoA hydratase, mitochondrial [Sus scrofa]                                                                                                                                                                                                          | 1.176 | 0.473 | 0.43  | 0.891 |
| gi 350596379 ref XP_003484266.1   | PREDICTED: vesicle-trafficking protein SEC22b-like [Sus scrofa] >gi 350583458 ref XP_003481524.1  PREDICTED: vesicle-trafficking protein SEC22b [Sus scrofa]                                                                                             | 0.749 | 0.447 | 0.474 | 0.538 |
| gi 350582129 ref XP_003354780.2   | PREDICTED: ig kappa chain V-II region RPMI 6410-like [Sus scrofa]                                                                                                                                                                                        | 0.919 | 1.388 | 1.364 | 0.923 |
| gi 350592539 ref XP_003483482.1   | PREDICTED: translational activator GCN1, partial [Sus scrofa]                                                                                                                                                                                            | ---   | ---   | ---   | ---   |
| gi 17432930 sp Q9N2I1.1 CASP1_PIG | RecName: Full=Caspase-1; Short=CASP-1; AltName: Full=Interleukin-1 beta convertase; Short=IL-1BC; AltName: Full=Interleukin-1 beta-converting enzyme; Short=ICE; Short=IL-1 beta-converting enzyme; AltName: Full=p45; Contains: RecName: Full=Caspase-1 | 2.442 | 1.382 | 1.594 | 1.486 |
| gi 340007402 ref NP_001229989.1   | RAB10, member RAS oncogene family [Sus scrofa]                                                                                                                                                                                                           | 0.916 | 0.388 | 0.456 | 0.797 |
| gi 212549623 ref NP_001131101.1   | endoplasmic reticulum resident protein 44 precursor [Sus scrofa] >gi 187480160 gb ACD13000.1  thioredoxin domain-containing 4 [Sus scrofa]                                                                                                               | 1.194 | 0.716 | 0.968 | 1.059 |
| gi 229620 prf 770227A             | dehydrogenase H4,lactate                                                                                                                                                                                                                                 | 2.789 | 2.491 | 1.866 | 3.254 |
| gi 56792866 gb AAW30628.1         | unknown [Sus scrofa]                                                                                                                                                                                                                                     |       |       |       |       |
| gi 282403837 pdb 5LDH A           | Chain A, Structure Of The Active Ternary Complex Of Pig Heart Lactate Dehydrogenase With S-Lac-Nad At 2.7 Angstroms                                                                                                                                      |       |       |       |       |

|                                 |                                                                                                                                                                                                                                                            |       |       |       |       |
|---------------------------------|------------------------------------------------------------------------------------------------------------------------------------------------------------------------------------------------------------------------------------------------------------|-------|-------|-------|-------|
|                                 | Resolution >gi 282403838 pdb 5LDH B Chain B, Structure Of The Active Ternary Complex Of Pig Heart Lactate Dehydrogenase With S-Lac-Na                                                                                                                      |       |       |       |       |
| gi 56792857 gb AAW30625.1       | unknown, partial [Sus scrofa] >gi 56792872 gb AAW30630.1  unknown [Sus scrofa]                                                                                                                                                                             |       |       |       |       |
| gi 164518958 ref NP_001106758.1 | L-lactate dehydrogenase B chain [Sus scrofa] >gi 1170738 sp P00336.3 LD HB_PIG RecName: Full=L-lactate dehydrogenase B chain; Short=LDH-B; AltName: Full=LDH heart subunit; Short=LDH-H >gi 473575 gb AAA50438.1  lactate dehydrogenase-B [Sus scrofa dome |       |       |       |       |
| gi 194044035 ref XP_001928829.1 | PREDICTED: splicing factor 3B subunit 1 isoform 1 [Sus scrofa]                                                                                                                                                                                             | 0.537 | 0.939 | 0.99  | 1.072 |
| gi 350582773 ref XP_003481353.1 | PREDICTED: 40S ribosomal protein S7-like isoform 2 [Sus scrofa] >gi 350582771 ref XP_003481352.1  PREDICTED: 40S ribosomal protein S7-like isoform 1 [Sus scrofa]                                                                                          | 0.624 | 0.404 | 0.255 | 0.765 |
| gi 335309199 ref XP_003361534.1 | PREDICTED: AP-1 complex subunit sigma-1A-like [Sus scrofa]                                                                                                                                                                                                 | 0.824 | 0.539 | 0.476 | 0.893 |
| gi 298160923 ref NP_001177141.1 | DDRKG domain-containing protein 1 [Sus scrofa]                                                                                                                                                                                                             | 0.358 | 0.749 | 0.594 | 0.461 |
| gi 2498311 sp Q28943.1 DPYD_PIG | RecName: Full=Dihydropyrimidine dehydrogenase [NADP(+)]; Short=DHPDHase; Short=DPD; AltName: Full=Dihydrothymine dehydrogenase; AltName: Full=Dihydrouracil dehydrogenase; Flags: Precursor >gi 47522904 ref NP_999209.1  dihydropyrimidine dehydrogenase  | 1.144 | 1.171 | 1.04  | 1.431 |
| gi 20663678 pdb 1GTH D          | Chain D, Dihydropyrimidine Dehydrogenase (Dpd) From Pig, Ternary Complex With Nadph And 5-Iodouracil >gi 20663676 pdb 1GTH B Chain B, Dihydropyrimidine                                                                                                    |       |       |       |       |

|                                 |                                                                                                                                                                                                                                                          |       |       |       |       |
|---------------------------------|----------------------------------------------------------------------------------------------------------------------------------------------------------------------------------------------------------------------------------------------------------|-------|-------|-------|-------|
|                                 | Dehydrogenase (Dpd) From Pig, Ternary Complex With Nadph And 5-Iodouracil >gi 20663644 pdb 1GTE D                                                                                                                                                        |       |       |       |       |
| gi 13399653 pdb 1H7X C          | Chain C, Dihydropyrimidine Dehydrogenase (Dpd) From Pig, Ternary Complex Of A Mutant Enzyme (C671a), Nadph And 5-Fluorouracil >gi 13399651 pdb 1H7X A Chain A, Dihydropyrimidine Dehydrogenase (Dpd) From Pig, Ternary Complex Of A Mutant Enzyme (C671a |       |       |       |       |
| gi 350591497 ref XP_003483284.1 | PREDICTED: ras-related protein Rab-7a-like [Sus scrofa]                                                                                                                                                                                                  | 0.731 | 0.453 | 0.527 | 0.729 |
| gi 190360663 ref NP_001121949.1 | FYVE and coiled-coil domain-containing protein 1 [Sus scrofa] >gi 41688293 dbj BAD08647.1  FYVE and coiled-coil domain containing 1 [Sus scrofa]                                                                                                         | 0.991 | 0.625 | 1.214 | 0.925 |
| gi 194042806 ref XP_001927837.1 | PREDICTED: annexin A7 isoform 1 [Sus scrofa]                                                                                                                                                                                                             | 0.478 | 1.169 | 1.679 | 1.453 |
| gi 335301795 ref XP_003359285.1 | PREDICTED: annexin A7 [Sus scrofa]                                                                                                                                                                                                                       |       |       |       |       |
| gi 194038359 ref XP_001929028.1 | PREDICTED: glutaredoxin-related protein 5, mitochondrial-like [Sus scrofa]                                                                                                                                                                               | 1.169 | 0.703 | 0.919 | 0.677 |
| gi 148235351 ref NP_001090944.1 | NADH dehydrogenase ubiquinone flavoprotein 2 [Sus scrofa] >gi 117660947 gb ABK55646.1  NDUFV2 [Sus scrofa]                                                                                                                                               | 0.501 | 0.531 | 0.567 | 0.591 |
| gi 335287837 ref XP_001926233.3 | PREDICTED: prefoldin subunit 5-like isoform 1 [Sus scrofa]                                                                                                                                                                                               | 1.066 | 2.467 | 2.792 | 1.805 |
| gi 343790920 ref NP_001230517.1 | fumarate hydratase [Sus scrofa]                                                                                                                                                                                                                          | 1.509 | 0.966 | 0.89  | 1.303 |
| gi 297747368 ref NP_001172101.1 | ubiquinol-cytochrome c reductase binding protein [Sus scrofa]                                                                                                                                                                                            | 0.352 | 0.887 | 1.053 | 0.506 |
| gi 350591701 ref XP_003132571.3 | PREDICTED: Golgi integral membrane protein 4 [Sus scrofa]                                                                                                                                                                                                | ---   | ---   | ---   | ---   |
| gi 350583385 ref XP_001927905.3 | PREDICTED: tuftelin, partial [Sus scrofa]                                                                                                                                                                                                                | 0.927 | 0.974 | 1.298 | 0.546 |
| gi 350589959 ref XP_003482      | PREDICTED: LIM domain only                                                                                                                                                                                                                               | 0.679 | 1.532 | 1.067 | 0.786 |

|                                   |                                                                                                                                                                                                                                                           |       |       |       |       |
|-----------------------------------|-----------------------------------------------------------------------------------------------------------------------------------------------------------------------------------------------------------------------------------------------------------|-------|-------|-------|-------|
| 961.1                             | protein 7-like [Sus scrofa]                                                                                                                                                                                                                               |       |       |       |       |
| gi 350585977 ref XP_003127887.3   | PREDICTED: erythrocyte membrane protein band 4.1-like 3 [Sus scrofa]                                                                                                                                                                                      | 0.659 | 0.795 | 0.953 | 0.92  |
| gi 335281676 ref XP_003353867.1   | PREDICTED: heterogeneous nuclear ribonucleoprotein U-like 2 [Sus scrofa]                                                                                                                                                                                  | 1.432 | 0.889 | 1.03  | 1.367 |
| gi 350578507 ref XP_003121503.3   | PREDICTED: asparaginyl-tRNA synthetase, cytoplasmic-like [Sus scrofa]                                                                                                                                                                                     | 1.923 | 1.266 | 1.484 | 1.92  |
| gi 335281552 ref XP_003122601.2   | PREDICTED: EH domain-containing protein 1 [Sus scrofa]                                                                                                                                                                                                    | 1.348 | 2.254 | 2.244 | 1.547 |
| gi 312062805 ref NP_001185852.1   | chloride intracellular channel protein 5 [Sus scrofa] >gi 197361201 gb ACH70136.1  chloride intracellular channel 5 [Sus scrofa]                                                                                                                          | 2.034 | 0.871 | 1     | 1.572 |
| gi 346716348 ref NP_001231189.1   | arginine--tRNA ligase, cytoplasmic [Sus scrofa]                                                                                                                                                                                                           | 1.61  | 0.986 | 0.841 | 1.429 |
| gi 335309827 ref XP_003361787.1   | PREDICTED: nuclear autoantigenic sperm protein, partial [Sus scrofa]                                                                                                                                                                                      | 1.435 | 2.468 | 1.368 | 2.088 |
| gi 335288150 ref XP_003126347.2   | PREDICTED: prolown-density lipoprotein receptor-related protein 1-like [Sus scrofa]                                                                                                                                                                       | 0.776 | 0.558 | 0.53  | 0.707 |
| gi 335294978 ref XP_003357366.1   | PREDICTED: coatomer subunit delta isoform 1 [Sus scrofa]                                                                                                                                                                                                  | 0.933 | 0.878 | 0.796 | 1.047 |
| gi 47523744 ref NP_999507.1       | serine/threonine-protein kinase OSR1 [Sus scrofa] >gi 73621342 sp Q863I2.1 OXSR1_PIG RecName: Full=Serine/threonine-protein kinase OSR1; AltName: Full=Oxidative stress-responsive 1 protein >gi 30525874 gb AAP32466.1  oxidative-stress responsive 1 [S | 0.723 | 0.654 | 0.991 | 0.473 |
| gi 113205586 ref NP_001038000.1   | 26S proteasome non-ATPase regulatory subunit 4 [Sus scrofa] >gi 55983054 gb AAV69969.1  proteasome 26S subunit non-ATPase 4 [Sus scrofa]                                                                                                                  | 0.572 | 0.843 | 1.19  | 0.746 |
| gi 158514030 sp A1XQU3.1 RL14_PIG | RecName: Full=60S ribosomal protein L14 >gi 148237282 ref NP_001090947.1  60S ribosomal protein L14 [Sus                                                                                                                                                  | 1.034 | 0.626 | 0.479 | 0.855 |

|                                 |                                                                                                                                                                         |        |       |       |       |
|---------------------------------|-------------------------------------------------------------------------------------------------------------------------------------------------------------------------|--------|-------|-------|-------|
|                                 | scrofa] >gi 117661006 gb ABK55649.1  RPL14 [Sus scrofa]                                                                                                                 |        |       |       |       |
| gi 350586418 ref XP_001929155.3 | PREDICTED: GMP reductase 1 [Sus scrofa]                                                                                                                                 | ---    | ---   | ---   | ---   |
| gi 350587731 ref XP_003357047.2 | PREDICTED: LPS-responsive vesicle trafficking, beach and anchor containing, partial [Sus scrofa]                                                                        | 0.695  | 0.477 | 0.325 | 0.352 |
| gi 350595424 ref XP_003484107.1 | PREDICTED: chromobox protein homolog 3-like isoform 2 [Sus scrofa] >gi 350595422 ref XP_003360239.2  PREDICTED: chromobox protein homolog 3-like isoform 1 [Sus scrofa] | 1.138  | 2.126 | 2.251 | 1.606 |
| gi 311255888 ref XP_003126410.1 | PREDICTED: cullin-associated NEDD8-dissociated protein 1-like [Sus scrofa]                                                                                              | 1.43   | 0.839 | 0.627 | 0.959 |
| gi 350584746 ref XP_003481817.1 | PREDICTED: cullin-associated NEDD8-dissociated protein 1 [Sus scrofa]                                                                                                   |        |       |       |       |
| gi 330688410 ref NP_001193464.1 | actin related protein 2/3 complex, subunit 4 [Sus scrofa] >gi 195562233 gb ACG50184.1  actin related protein 2/3 complex subunit 4 [Sus scrofa]                         | 1.832  | 0.682 | 0.707 | 1.312 |
| gi 350581241 ref XP_003124117.3 | PREDICTED: leucyl-tRNA synthetase, cytoplasmic [Sus scrofa]                                                                                                             | 46.169 | 0.722 | 1.086 | 1.314 |
| gi 335310669 ref XP_003362140.1 | PREDICTED: hypothetical protein LOC100622909 [Sus scrofa]                                                                                                               | 0.605  | 0.902 | 0.685 | 0.684 |
| gi 350590115 ref XP_003131204.3 | PREDICTED: RING finger protein 213-like, partial [Sus scrofa]                                                                                                           | 1.242  | 0.866 | 0.787 | 1.607 |
| gi 89573899 gb ABD77175.1       | ribosomal protein L18 [Sus scrofa]                                                                                                                                      | 0.92   | 0.907 | 0.779 | 1.498 |
| gi 335289913 ref XP_003356019.1 | PREDICTED: 60S ribosomal protein L18 isoform 2 [Sus scrofa] >gi 335289911 ref XP_003356018.1  PREDICTED: 60S ribosomal protein L18 isoform 1 [Sus scrofa]               |        |       |       |       |
| gi 335289915 ref XP_003356020.1 | PREDICTED: 60S ribosomal protein L18 isoform 3 [Sus scrofa]                                                                                                             |        |       |       |       |
| gi 22770997 gb AAN06824.1       | thioredoxin reductase [Sus scrofa]                                                                                                                                      | 2.086  | 1.864 | 1.576 | 2.294 |
| gi 255918208 ref NP_9993192     | thioredoxin reductase 1, cytoplasmic [Sus scrofa]                                                                                                                       |        |       |       |       |
| gi 194036302 ref XP_001926      | PREDICTED: histone H2A type                                                                                                                                             | 0.779  | 1.057 | 1.179 | 0.893 |

|                                 |                                                                                                                                                                                                                                                            |       |       |       |       |
|---------------------------------|------------------------------------------------------------------------------------------------------------------------------------------------------------------------------------------------------------------------------------------------------------|-------|-------|-------|-------|
| 704.1                           | 2-B-like [Sus scrofa]                                                                                                                                                                                                                                      |       |       |       |       |
| gi 194039746 ref XP_001925399.1 | PREDICTED: histone H2A type 1-A-like [Sus scrofa]                                                                                                                                                                                                          |       |       |       |       |
| gi 335294990 ref XP_003129998.2 | PREDICTED: histone H2A.x-like [Sus scrofa]                                                                                                                                                                                                                 |       |       |       |       |
| gi 350595677 ref XP_003360362.2 | PREDICTED: GRIP1-associated protein 1 [Sus scrofa]                                                                                                                                                                                                         | 0.784 | 1.938 | 1.963 | 0.87  |
| gi 311258910 ref XP_003127843.1 | PREDICTED: splicing factor 3A subunit 3 isoform 1 [Sus scrofa]                                                                                                                                                                                             | 0.817 | 0.532 | 0.761 | 1.035 |
| gi 335291009 ref XP_003356364.1 | PREDICTED: splicing factor 3A subunit 3 isoform 2 [Sus scrofa]                                                                                                                                                                                             |       |       |       |       |
| gi 350594057 ref XP_003359743.2 | PREDICTED: leucine-rich repeat flightless-interacting protein 2-like [Sus scrofa]                                                                                                                                                                          | 0.725 | 0.781 | 1.048 | 0.688 |
| gi 350596308 ref XP_003361027.2 | PREDICTED: leucine-rich repeat flightless-interacting protein 2-like [Sus scrofa]                                                                                                                                                                          |       |       |       |       |
| gi 58801555 ref NP_001011727.1  | adenosylhomocysteinase [Sus scrofa] >gi 61216107 sp Q710C4.3 S AHH_PIG RecName: Full=Adenosylhomocysteinase; Short=AdoHcyase; AltName: Full=S-adenosyl-L-homocysteine hydrolase >gi 40644231 emb CAD20603.1  S-adenosylhomocysteine hydrolase [Sus scrofa] | 1.846 | 1.077 | 1.022 | 1.112 |
| gi 262036923 dbj BAI47597.1     | adenosylhomocysteinase [Sus scrofa] >gi 67513973 dbj BAD99576.1  S-adenosylhomocysteine hydrolase [Sus scrofa]                                                                                                                                             |       |       |       |       |
| gi 347300360 ref NP_001231474.1 | serine/arginine repetitive matrix protein 2 [Sus scrofa]                                                                                                                                                                                                   | 0.351 | 0.966 | 0.517 | 0.477 |
| gi 335279750 ref XP_003353424.1 | PREDICTED: normal mucosa of esophagus-specific gene 1 protein-like isoform 2 [Sus scrofa] >gi 194034801 ref XP_001925712.1  PREDICTED: normal mucosa of esophagus-specific gene 1 protein-like isoform 1 [Sus scrofa]                                      | 0.512 | 0.43  | 0.425 | 0.466 |
| gi 335282347 ref XP_003354039.1 | PREDICTED: lamin-B2 [Sus scrofa]                                                                                                                                                                                                                           | 0.704 | 0.775 | 0.682 | 0.731 |
| gi 75054313 sp Q8WNW3.1         | RecName: Full=Junction                                                                                                                                                                                                                                     | 1.027 | 1.124 | 0.855 | 1.047 |

|                                  |                                                                                                                                                                                                                                                           |       |       |       |       |
|----------------------------------|-----------------------------------------------------------------------------------------------------------------------------------------------------------------------------------------------------------------------------------------------------------|-------|-------|-------|-------|
| PLAK_PIG                         | plakoglobin >gi 47523712 ref NP_999488.1  junction plakoglobin [Sus scrofa] >gi 218103017 emb CAT82339.1  unnamed protein product [Sus scrofa] >gi 211637711 emb CAR97094.1  unnamed protein product [Sus scrofa] >gi 158065996 em                        |       |       |       |       |
| gi 335294095 ref XP_003357133.1  | PREDICTED: phosphatidylinositol N-acetylglucosaminyltransferase subunit Y-like isoform 2 [Sus scrofa]                                                                                                                                                     | 0.198 | 1.244 | 0.789 | 0.539 |
| gi 346644830 ref NP_001231167.1  | sulfide:quinone oxidoreductase, mitochondrial [Sus scrofa]                                                                                                                                                                                                | 0.889 | 0.519 | 0.467 | 0.803 |
| gi 350578685 ref XP_003480424.1  | PREDICTED: sulfide:quinone oxidoreductase, mitochondrial-like [Sus scrofa]                                                                                                                                                                                |       |       |       |       |
| gi 311275515 ref XP_003134775.1  | PREDICTED: NADH dehydrogenase [ubiquinone] 1 alpha subcomplex subunit 5-like [Sus scrofa]                                                                                                                                                                 | 0.491 | 0.657 | 0.595 | 0.425 |
| gi 91208342 sp Q4FAT7.1 BGLR_PIG | RecName: Full=Beta-glucuronidase; Flags: Precursor >gi 178056516 ref NP_001116593.1  beta-glucuronidase precursor [Sus scrofa] >gi 69146955 gb AAZ03639.1  beta-glucuronidase [Sus scrofa]                                                                | 1.038 | 1.395 | 1.756 | 1.38  |
| gi 147899784 ref NP_001090887.1  | elongation factor 1-alpha 1 [Sus scrofa] >gi 223019599 emb CAX36487.1  eukaryotic translation elongation factor 1 alpha 1 [Sus scrofa] >gi 223019597 emb CAX36486.1  eukaryotic translation elongation factor 1 alpha 1 [Sus scrofa] >gi 110287842 gb ABG | 0.764 | 0.57  | 0.438 | 0.68  |
| gi 350582040 ref XP_003481180.1  | PREDICTED: U5 small nuclear ribonucleoprotein 200 kDa helicase-like [Sus scrofa]                                                                                                                                                                          | 1.299 | 0.968 | 0.982 | 0.974 |
| gi 311255145 ref XP_001926338.2  | PREDICTED: thiosulfate sulfurtransferase [Sus scrofa]                                                                                                                                                                                                     | 1.947 | 0.819 | 1.357 | 1.494 |
| gi 122143720 sp Q19QT7.1 CGL_PIG | RecName: Full=Cystathionine gamma-lyase; AltName: Full=Cysteine-protein sulphydrase; AltName: Full=Gamma-cystathionase >gi 1132                                                                                                                           | 1.277 | 1.871 | 0.771 | 1.408 |

|                                   |                                                                                                                                                                                    |       |       |       |       |
|-----------------------------------|------------------------------------------------------------------------------------------------------------------------------------------------------------------------------------|-------|-------|-------|-------|
|                                   | 05776 ref NP_001038050.1  cystathionine gamma-lyase [Sus scrofa] >gi 104295139 gb ABF72039.1  cystathionase [Sus scrofa]                                                           |       |       |       |       |
| gi 335307937 ref XP_003361036.1   | PREDICTED: golgin subfamily A member 2, partial [Sus scrofa]                                                                                                                       | 0.688 | 0.535 | 1.047 | 0.64  |
| gi 335281280 ref XP_003122383.2   | PREDICTED: apical endosomal glycoprotein [Sus scrofa]                                                                                                                              | 0.502 | 0.431 | 0.468 | 0.419 |
| gi 350535040 ref NP_001233182.1   | eukaryotic translation initiation factor 4 gamma 1 [Sus scrofa] >gi 338784423 gb AEI98874.1  eukaryotic translation initiation factor 4 gamma 1 [Sus scrofa]                       | 0.75  | 1.018 | 0.881 | 1.059 |
| gi 335285985 ref XP_003125470.2   | PREDICTED: butyrophilin subfamily 1 member A1-like [Sus scrofa]                                                                                                                    | 0.952 | 0.469 | 0.543 | 0.886 |
| gi 346716222 ref NP_001231254.1   | histidine triad nucleotide-binding protein 2, mitochondrial isoform 1 precursor [Sus scrofa]                                                                                       | 2.84  | 1.204 | 1.571 | 1.916 |
| gi 350586921 ref XP_003482304.1   | PREDICTED: LOW QUALITY PROTEIN: apoptotic chromatin condensation inducer in the nucleus-like [Sus scrofa]                                                                          | 0.842 | 1.424 | 0.894 | 1.102 |
| gi 54036319 sp Q6QAP7.3 R_S17_PIG | RecName: Full=40S ribosomal protein S17 >gi 48675931 ref NP_001001634.1  40S ribosomal protein S17 [Sus scrofa] >gi 45269037 gb AAS55931.1  40S ribosomal protein S17 [Sus scrofa] | 0.7   | 0.663 | 0.859 | 0.552 |
| gi 389618965 gb AFK92990.1        | U2 small nuclear RNA auxiliary factor 2 [Sus scrofa]                                                                                                                               | 1.303 | 1.058 | 1.085 | 1.315 |
| gi 166796061 ref NP_001107756.1   | 60S ribosomal protein L5 [Sus scrofa] >gi 164598076 gb ABY61325.1  ribosomal protein L5 [Sus scrofa]                                                                               | 1.091 | 1.397 | 1.374 | 1.602 |
| gi 350584106 ref XP_003481667.1   | PREDICTED: SWI/SNF complex subunit SMARCC2 [Sus scrofa]                                                                                                                            | 0.755 | 0.898 | 0.717 | 0.863 |
| gi 350584110 ref XP_003481668.1   | PREDICTED: SWI/SNF complex subunit SMARCC2 [Sus scrofa]                                                                                                                            |       |       |       |       |
| gi 350584134 ref XP_003355513.2   | PREDICTED: SWI/SNF complex subunit SMARCC2-like [Sus scrofa]                                                                                                                       |       |       |       |       |
| gi 350584108 ref XP_001929203.4   | PREDICTED: SWI/SNF complex subunit SMARCC2 isoform 2 [Sus                                                                                                                          |       |       |       |       |



|                                 |                                                                                                                                                                                                                               |       |       |       |       |
|---------------------------------|-------------------------------------------------------------------------------------------------------------------------------------------------------------------------------------------------------------------------------|-------|-------|-------|-------|
|                                 | scrofa]                                                                                                                                                                                                                       |       |       |       |       |
| gi 350582612 ref XP_003481312.1 | PREDICTED: protein phosphatase 1G-like [Sus scrofa]                                                                                                                                                                           | 1.641 | 2.347 | 2.165 | 1.949 |
| gi 335287568 ref XP_003126098.2 | PREDICTED: probable ATP-dependent RNA helicase DDX17-like [Sus scrofa]                                                                                                                                                        | 1.312 | 0.99  | 0.748 | 1.883 |
| gi 350539515 ref NP_001233132.1 | ATP-dependent RNA helicase DDX3X [Sus scrofa] >gi 332113313 gb AEE02033.1  X-linked DEAD (Asp-Glu-Ala-Asp) box polypeptide 3 [Sus scrofa]                                                                                     | 1.197 | 0.674 | 1.417 | 1.242 |
| gi 47522800 ref NP_999152.1     | 60S ribosomal protein L22 [Sus scrofa] >gi 54039123 sp P67985.2 RL22_PIG RecName: Full=60S ribosomal protein L22; AltName: Full=Heparin-binding protein HBp15 >gi 409074 dbj BAA04547.1  heparin binding protein [Sus scrofa] | 0.815 | 0.549 | 0.479 | 0.997 |
| gi 122114359 gb AAZ42145.2      | cathepsin D [Sus scrofa]                                                                                                                                                                                                      | 1.729 | 1.191 | 1.125 | 1.992 |
| gi 311271975 ref XP_001926332.2 | PREDICTED: short/branched chain specific acyl-CoA dehydrogenase, mitochondrial [Sus scrofa]                                                                                                                                   | 1.307 | 0.714 | 0.94  | 1.408 |
| gi 297632426 ref NP_001172096.1 | signal sequence receptor, alpha [Sus scrofa]                                                                                                                                                                                  | 0.756 | 0.387 | 0.391 | 0.624 |
| gi 335293128 ref XP_003128866.2 | PREDICTED: alpha-adducin [Sus scrofa]                                                                                                                                                                                         | 1.111 | 2.272 | 1.557 | 1.839 |
| gi 343790870 ref NP_001230573.1 | adaptor-related protein complex 2, mu 1 subunit [Sus scrofa]                                                                                                                                                                  | ---   | ---   | ---   | ---   |
| gi 70986480 gb AAZ16514.1       | hepatic nuclear factor 1 [Sus scrofa]                                                                                                                                                                                         | 0.768 | 1.128 | 1.78  | 0.882 |
| gi 239836872 gb ACS29489.1      | HNF1A, partial [Sus scrofa]                                                                                                                                                                                                   |       |       |       |       |
| gi 74024901 ref NP_001027560.1  | hepatocyte nuclear factor 1-alpha [Sus scrofa] >gi 67866955 gb AAZ82454.1  hepatic nuclear factor 1 [Sus scrofa]                                                                                                              |       |       |       |       |
| gi 350592969 ref XP_003483583.1 | PREDICTED: phosphoglycerate mutase 1-like [Sus scrofa]                                                                                                                                                                        | 1.569 | 0.987 | 1.19  | 1.621 |
| gi 350587465 ref XP_003128987.3 | PREDICTED: RNA-binding protein 47-like isoform 1 [Sus scrofa]                                                                                                                                                                 | 0.543 | 0.435 | 0.259 | 0.65  |

|                                 |                                                                                                                                                                                         |       |       |       |       |
|---------------------------------|-----------------------------------------------------------------------------------------------------------------------------------------------------------------------------------------|-------|-------|-------|-------|
| gi 350587467 ref XP_003482419.1 | PREDICTED: RNA-binding protein 47-like [Sus scrofa]                                                                                                                                     |       |       |       |       |
| gi 335302082 ref XP_001926734.3 | PREDICTED: pyridine nucleotide-disulfide oxidoreductase domain-containing protein 2-like, partial [Sus scrofa]                                                                          | 0.426 | 0.287 | 0.465 | 0.295 |
| gi 146741316 dbj BAF62313.1     | adaptor-related protein complex 3, delta-1 subunit [Sus scrofa]                                                                                                                         |       |       |       |       |
| gi 335282242 ref XP_003354004.1 | PREDICTED: AT-rich interactive domain-containing protein 3A [Sus scrofa]                                                                                                                | 1.469 | 1.101 | 1.576 | 1.164 |
| gi 345110571 ref NP_001230773.1 | coproporphyrinogen oxidase [Sus scrofa]                                                                                                                                                 | 1.109 | 1.074 | 1.359 | 1.315 |
| gi 350529438 ref NP_001231909.1 | prefoldin subunit 3 [Sus scrofa]                                                                                                                                                        | 0.853 | 1.619 | 1.339 | 1.117 |
| gi 347582591 ref NP_001231560.1 | cytoskeleton-associated protein 4 [Sus scrofa]                                                                                                                                          | 0.93  | 1.457 | 1.466 | 0.995 |
| gi 350583879 ref XP_003481608.1 | PREDICTED: LOW QUALITY PROTEIN: cytoskeleton-associated protein 4 [Sus scrofa]                                                                                                          |       |       |       |       |
| gi 311247240 ref XP_003122553.1 | PREDICTED: splicing factor 3B subunit 2 [Sus scrofa]                                                                                                                                    | 0.716 | 1.012 | 0.897 | 0.818 |
| gi 347543782 ref NP_001231554.1 | glutathione synthetase [Sus scrofa]                                                                                                                                                     | 1.749 | 1.676 | 2.554 | 1.735 |
| gi 335293186 ref XP_003356895.1 | PREDICTED: grpE protein homolog 1, mitochondrial-like isoform 1 [Sus scrofa]                                                                                                            | 0.674 | 0.743 | 0.608 | 0.791 |
| gi 350587324 ref XP_003482387.1 | PREDICTED: grpE protein homolog 1, mitochondrial-like isoform 2 [Sus scrofa]                                                                                                            |       |       |       |       |
| gi 194039403 ref XP_001929632.1 | PREDICTED: CDC5 cell division cycle 5-like [Sus scrofa]                                                                                                                                 | 0.541 | 0.668 | 0.72  | 0.847 |
| gi 311247879 ref XP_003122857.1 | PREDICTED: 26S protease regulatory subunit 6A [Sus scrofa]                                                                                                                              | 1.082 | 0.958 | 0.856 | 1.058 |
| gi 72535182 ref NP_001026953.1  | ras-related protein Rab-14 [Sus scrofa] >gi 75060237 sp Q52NJ6.3 RAB14_PIG RecName: Full=Ras-related protein Rab-14 >gi 62868634 gb AAY17505.1  Ras-related protein Rab-14 [Sus scrofa] | 1.13  | 0.664 | 0.654 | 1.221 |
| gi 346421343 ref NP_001231      | ribosomal protein S10 [Sus scrofa]                                                                                                                                                      | 0.558 | 0.991 | 0.938 | 0.682 |

|                                 |                                                                                                                                                                                                                                                      |       |       |       |       |
|---------------------------------|------------------------------------------------------------------------------------------------------------------------------------------------------------------------------------------------------------------------------------------------------|-------|-------|-------|-------|
| 035.1                           |                                                                                                                                                                                                                                                      |       |       |       |       |
| gi 311245734 ref XP_003121939.1 | PREDICTED: hypothetical protein LOC100038023 [Sus scrofa] >gi 311245732 ref XP_003121938.1  PREDICTED: hypothetical protein LOC100038023 [Sus scrofa]                                                                                                | 0.464 | 0.315 | 0.345 | 0.559 |
| gi 311275226 ref XP_003134622.1 | PREDICTED: glutathione S-transferase kappa 1-like isoform 2 [Sus scrofa]                                                                                                                                                                             | 0.864 | 0.619 | 0.577 | 1.072 |
| gi 311275228 ref XP_003134621.1 | PREDICTED: glutathione S-transferase kappa 1-like isoform 1 [Sus scrofa]                                                                                                                                                                             |       |       |       |       |
| gi 47523672 ref NP_999468.1     | 2~5~oligoadenylate synthase 1 [Sus scrofa] >gi 6226834 sp Q29599.3 OAS1_PIG RecName: Full=2~5~oligoadenylate synthase 1; Short=(2-5~)oligo(A) synthase 1; Short=2-5A synthase 1; AltName: Full=p42 OAS >gi 3451331 emb CAA12397.1  2~5~ oligoadenyla | 0.885 | 0.462 | 0.342 | 0.831 |
| gi 39654572 pdb 1PX5 A          | Chain A, Crystal Structure Of The 2~Specific And Double-Stranded Rna-Activated Interferon-Induced Antiviral Protein 2~5~ Oligoadenylate Synthetase >gi 39654573 pdb 1PX5 B                                                                           |       |       |       |       |
| gi 311247106 ref XP_003122482.1 | PREDICTED: NADH dehydrogenase [ubiquinone] iron-sulfur protein 8, mitochondrial-like isoform 1 [Sus scrofa]                                                                                                                                          | 0.729 | 0.793 | 0.549 | 0.59  |
| gi 311247108 ref XP_003122483.1 | PREDICTED: NADH dehydrogenase [ubiquinone] iron-sulfur protein 8, mitochondrial-like isoform 2 [Sus scrofa]                                                                                                                                          |       |       |       |       |
| gi 335310373 ref XP_003362002.1 | PREDICTED: hypothetical protein LOC100628225, partial [Sus scrofa]                                                                                                                                                                                   | 0.441 | 0.79  | 0.879 | 0.607 |
| gi 311252247 ref XP_003124998.1 | PREDICTED: macrophage-capping protein-like isoform 4 [Sus scrofa] >gi 311252243 ref XP_00312                                                                                                                                                         | 1.498 | 2.4   | 4.476 | 1.818 |

|                                     |                                                                                                                                                                                                                                                                                          |       |       |       |       |
|-------------------------------------|------------------------------------------------------------------------------------------------------------------------------------------------------------------------------------------------------------------------------------------------------------------------------------------|-------|-------|-------|-------|
|                                     | 4996.1  PREDICTED:<br>macrophage-capping protein-like<br>isoform 2 [Sus<br>scrofa] >gi 311252249 ref XP_00312<br>4997.1  PREDICTED:<br>macrophage-capping protein-like<br>isoform                                                                                                        |       |       |       |       |
| gi 311254554 ref XP_003125<br>887.1 | PREDICTED: bcl-2-like protein<br>15-like [Sus scrofa]                                                                                                                                                                                                                                    | 0.924 | 0.644 | 0.797 | 0.933 |
| gi 342349346 ref NP_001230<br>149.1 | lon peptidase 1, mitochondrial [Sus<br>scrofa]                                                                                                                                                                                                                                           | 0.825 | 0.398 | 0.342 | 0.849 |
| gi 350529356 ref NP_001231<br>917.1 | NADH dehydrogenase (ubiquinone)<br>Fe-S protein 5, 15kDa<br>(NADH-coenzyme Q reductase) [Sus<br>scrofa]                                                                                                                                                                                  | 0.217 | 0.436 | 0.519 | 0.262 |
| gi 347582660 ref NP_001231<br>584.1 | mesencephalic astrocyte-derived<br>neurotrophic factor precursor [Sus<br>scrofa] >gi 350591263 ref XP_00348<br>3237.1  PREDICTED: mesencephalic<br>astrocyte-derived neurotrophic factor<br>[Sus<br>scrofa] >gi 306563669 gb ADN03186<br>.1  mesencephalic astrocyte-derived<br>neu      | 0.557 | 0.812 | 0.705 | 0.639 |
| gi 311252948 ref XP_003125<br>347.1 | PREDICTED: cell growth regulator<br>with EF hand domain protein 1-like<br>isoform 2 [Sus scrofa]                                                                                                                                                                                         | 0.317 | 0.344 | 0.421 | 0.354 |
| gi 311252950 ref XP_003125<br>346.1 | PREDICTED: cell growth regulator<br>with EF hand domain protein 1-like<br>isoform 1 [Sus scrofa]                                                                                                                                                                                         |       |       |       |       |
| gi 212549619 ref NP_001131<br>099.1 | ERO1-like protein alpha precursor<br>[Sus<br>scrofa] >gi 226741411 sp B6CVD7.1 <br>ERO1A_PIG RecName:<br>Full=ERO1-like protein alpha;<br>Short=ERO1-L;<br>Short=ERO1-L-alpha; AltName:<br>Full=Endoplasmic<br>oxidoreductin-1-like protein;<br>AltName:<br>Full=Oxidoreductin-1-L-alpha | 1.314 | 1.946 | 1.577 | 1.857 |
| gi 335288894 ref XP_003126<br>772.2 | PREDICTED: ubiquitin-conjugating<br>enzyme E2 N-like [Sus scrofa]                                                                                                                                                                                                                        | 1.78  | 2.226 | 1.835 | 1.902 |

|                                  |                                                                                                                                                                                                     |       |       |       |       |
|----------------------------------|-----------------------------------------------------------------------------------------------------------------------------------------------------------------------------------------------------|-------|-------|-------|-------|
| gi 350587106 ref XP_003128729.2  | PREDICTED: protein sel-1 homolog 1-like [Sus scrofa]                                                                                                                                                | ---   | ---   | ---   | ---   |
| gi 260593713 ref NP_001157119.1  | occludin [Sus scrofa] >gi 239934655 emb CAZ64276.1  occludin [Sus scrofa domesticus]                                                                                                                | 1.191 | ---   | ---   | 1.157 |
| gi 329744588 ref NP_001193269.1  | p30 DBC protein [Sus scrofa]                                                                                                                                                                        | 1.715 | 1.761 | 0.955 | 1.182 |
| gi 311245701 ref XP_003121927.1  | PREDICTED: S-methyl-5~-thioadenosine phosphorylase-like [Sus scrofa]                                                                                                                                | 2.559 | 2.314 | 1.457 | 1.57  |
| gi 84028320 sp Q9GKX6.1 GALM_PIG | RecName: Full=Aldose 1-epimerase; AltName: Full=Galactose mutarotase >gi 47523866 ref NP_999571.1  aldose 1-epimerase [Sus scrofa] >gi 11611545 dbj BAB18973.1  aldose 1-epimerase [Sus scrofa]     | 1.501 | 0.864 | 0.931 | 1.695 |
| gi 350584800 ref XP_003355778.2  | PREDICTED: cytochrome c oxidase subunit 4 isoform 1, mitochondrial-like [Sus scrofa]                                                                                                                | 0.5   | 0.278 | 0.305 | 0.408 |
| gi 335278800 ref XP_003121142.2  | PREDICTED: afadin [Sus scrofa]                                                                                                                                                                      | 0.568 | 1.225 | 1.062 | 0.765 |
| gi 167908791 ref NP_001108148.1  | EPLIN-b [Sus scrofa] >gi 86450155 gb ABC96266.1  EPLIN-b [Sus scrofa]                                                                                                                               | 0.656 | 0.97  | 0.799 | 0.801 |
| gi 335291962 ref XP_001928015.3  | PREDICTED: E3 ubiquitin-protein ligase TRIM31 [Sus scrofa] >gi 211926941 dbj BAG82682.1  tripartite motif-containing protein 31 [Sus scrofa]                                                        | 0.99  | 0.644 | 1.319 | 1.179 |
| gi 350584162 ref XP_003481682.1  | PREDICTED: serine hydroxymethyltransferase, mitochondrial-like isoform 2 [Sus scrofa]                                                                                                               | 1.205 | 0.748 | 0.778 | 0.894 |
| gi 350584170 ref XP_003355531.2  | PREDICTED: serine hydroxymethyltransferase, mitochondrial-like [Sus scrofa] >gi 311255743 ref XP_003126345.1  PREDICTED: serine hydroxymethyltransferase, mitochondrial-like isoform 1 [Sus scrofa] |       |       |       |       |
| gi 346716298 ref NP_001231025.1  | heterogeneous nuclear ribonucleoprotein G [Sus scrofa]                                                                                                                                              | 0.958 | 1.657 | 1.159 | 1.09  |

|                                  |                                                                                                                                                                                                                                                           |       |       |       |       |
|----------------------------------|-----------------------------------------------------------------------------------------------------------------------------------------------------------------------------------------------------------------------------------------------------------|-------|-------|-------|-------|
| gi 335287882 ref XP_003126232.2  | PREDICTED: LOW QUALITY PROTEIN: sterol O-acyltransferase 2-like [Sus scrofa]                                                                                                                                                                              | 1.336 | 0.918 | 1.402 | 0.942 |
| gi 335282871 ref XP_003123529.2  | PREDICTED: epidermal growth factor receptor pathway substrate 15-like 1 [Sus scrofa]                                                                                                                                                                      | 1.048 | 1.619 | 1.354 | 1.24  |
| gi 343478283 ref NP_001230406.1  | proteasome (prosome, macropain) 26S subunit, non-ATPase, 2 [Sus scrofa]                                                                                                                                                                                   | 0.871 | 1.141 | 0.897 | 1.024 |
| gi 311277195 ref XP_003135533.1  | PREDICTED: host cell factor 1 [Sus scrofa]                                                                                                                                                                                                                | 0.794 | 0.801 | 1.1   | 0.752 |
| gi 75059260 sp Q29041.1 FCN2_PIG | RecName: Full=Ficolin-2; AltName: Full=Collagen/fibrinogen domain-containing protein 2; AltName: Full=Ficolin-B; AltName: Full=Ficolin-beta; AltName: Full=L-ficolin; Flags: Precursor >gi 47523126 ref NP_999033.1  ficolin-2 precursor [Sus scrofa] >gi | 0.555 | 0.353 | 0.303 | 0.509 |
| gi 350584750 ref XP_003126831.3  | PREDICTED: cysteine-rich with EGF-like domain protein 2-like isoform 1 [Sus scrofa]                                                                                                                                                                       | 0.813 | 1.265 | 1.285 | 1.047 |
| gi 350584752 ref XP_003481818.1  | PREDICTED: cysteine-rich with EGF-like domain protein 2-like [Sus scrofa]                                                                                                                                                                                 |       |       |       |       |
| gi 346986456 ref NP_001231378.1  | nucleoside diphosphate kinase 3 isoform 1 precursor [Sus scrofa]                                                                                                                                                                                          | 0.489 | 0.953 | 0.592 | 0.467 |
| gi 346986458 ref NP_001231379.1  | nucleoside diphosphate kinase 3 isoform 2 precursor [Sus scrofa]                                                                                                                                                                                          |       |       |       |       |
| gi 238018148 ref NP_001153899.1  | ADP-ribosylation factor 1 [Sus scrofa] >gi 212725657 gb ACJ38117.1  ADP-ribosylation factor 1 [Sus scrofa] >gi 237638742 gb ACR07973.1  ADP-ribosylation factor 1 [Sus scrofa]                                                                            | 0.779 | 0.435 | 0.407 | 0.868 |
| gi 335280985 ref XP_003122213.2  | PREDICTED: golgin subfamily A member 1 [Sus scrofa]                                                                                                                                                                                                       | 1.837 | 1.582 | 2.493 | 1.315 |
| gi 350594464 ref XP_003483904.1  | PREDICTED: LOW QUALITY PROTEIN: clathrin interactor 1 [Sus scrofa]                                                                                                                                                                                        | 1.167 | 0.847 | 1.137 | 1.276 |
| gi 2493048 sp Q95312.1 ATPD_PIG  | RecName: Full=ATP synthase subunit delta, mitochondrial;                                                                                                                                                                                                  | 0.313 | 0.434 | 0.45  | 0.302 |

|                                 |                                                                                                                             |       |       |       |       |
|---------------------------------|-----------------------------------------------------------------------------------------------------------------------------|-------|-------|-------|-------|
|                                 | AltName: Full=F-ATPase delta subunit; Flags: Precursor                                                                      |       |       |       |       |
| gi 356461003 ref NP_001238977.1 | RNA-binding protein EWS [Sus scrofa] >gi 351738726 gb AEQ61463.1  EWS [Sus scrofa]                                          | 1     | 1.531 | 1.38  | 1.45  |
| gi 350585922 ref XP_003127872.3 | PREDICTED: adenylyl cyclase-associated protein 1, partial [Sus scrofa]                                                      | 3.624 | 2.043 | 1.696 | 4.525 |
| gi 350585924 ref XP_003356378.2 | PREDICTED: adenylyl cyclase-associated protein 1-like [Sus scrofa]                                                          |       |       |       |       |
| gi 311249270 ref XP_003123549.1 | PREDICTED: coiled-coil domain-containing protein 124-like [Sus scrofa]                                                      | ---   | ---   | ---   | ---   |
| gi 346421386 ref NP_001231066.1 | ATP synthase subunit g, mitochondrial [Sus scrofa]                                                                          | 0.905 | 0.362 | 0.382 | 0.946 |
| gi 356614808 gb AET25525.1      | mitochondrial NADH dehydrogenase Fe-S protein 4 [Sus scrofa]                                                                | 0.432 | 0.564 | 0.552 | 0.513 |
| gi 190360639 ref NP_001121941.1 | interferon-induced 17 kDa protein [Sus scrofa] >gi 182406743 gb ACB87600.1  interferon stimulated gene 15 [Sus scrofa]      | 0.78  | 2.3   | 4.581 | 2.706 |
| gi 335299628 ref XP_001926139.3 | PREDICTED: coatomer subunit beta~ [Sus scrofa]                                                                              | 0.808 | 0.654 | 0.856 | 0.817 |
| gi 311245810 ref XP_001924714.2 | PREDICTED: GTP:AMP phosphotransferase, mitochondrial isoform 1 [Sus scrofa]                                                 | 1.66  | 0.785 | 1.152 | 1.897 |
| gi 345090993 ref NP_001230731.1 | RAB8A, member RAS oncogene family [Sus scrofa]                                                                              | 0.701 | 0.514 | 0.564 | 0.856 |
| gi 335296120 ref XP_003357690.1 | PREDICTED: Golgi resident protein GCP60-like [Sus scrofa]                                                                   | 0.636 | 0.595 | 0.763 | 0.857 |
| gi 335292526 ref XP_001927459.2 | PREDICTED: receptor-interacting serine/threonine-protein kinase 3-like [Sus scrofa]                                         | ---   | ---   | ---   | ---   |
| gi 350593418 ref XP_003359535.2 | PREDICTED: hypothetical protein LOC100627320 [Sus scrofa]                                                                   | 1.522 | 1.994 | 2.167 | 1.535 |
| gi 47522860 ref NP_999184.1     | dehydrogenase/reductase SDR family member 4 [Sus scrofa] >gi 186972939 pdb 2ZAT D Chain D, Crystal Structure Of A Mammalian | 1.41  | 1.015 | 0.948 | 0.791 |

|                                        |                                                                                                                                                                                                                                                                                        |       |       |       |       |
|----------------------------------------|----------------------------------------------------------------------------------------------------------------------------------------------------------------------------------------------------------------------------------------------------------------------------------------|-------|-------|-------|-------|
|                                        | Reductase >gi 186972937 pdb 2ZAT <br>B Chain B, Crystal Structure Of A<br>Mammalian<br>Reductase >gi 186972938 pdb 2ZAT <br>C Chain C, Crys                                                                                                                                            |       |       |       |       |
| gi 308153436 sp Q8WNV7.2 <br>DHRS4_PIG | RecName:<br>Full=Dehydrogenase/reductase SDR<br>family member 4; AltName:<br>Full=NADPH-dependent carbonyl<br>reductase/NADP-retinol<br>dehydrogenase; Short=CR;<br>Short=PHCR; AltName:<br>Full=NADPH-dependent retinol<br>dehydrogenase/reductase;<br>Short=NDRD; AltName: Full=Pe   |       |       |       |       |
| gi 305855148 ref NP_001182<br>266.1    | peptidyl-prolyl cis-trans isomerase<br>FKBP4 [Sus<br>scrofa] >gi 285818414 gb ADC38880<br>.1  FK506 binding protein 4 [Sus<br>scrofa]                                                                                                                                                  | 0.978 | 0.691 | 0.784 | 1.009 |
| gi 346644874 ref NP_001231<br>109.1    | T-complex protein 1 subunit gamma<br>[Sus scrofa]                                                                                                                                                                                                                                      | 1.406 | 0.959 | 0.898 | 1.328 |
| gi 350590014 ref XP_003357<br>929.2    | PREDICTED:<br>serine/threonine-protein kinase 24<br>[Sus scrofa]                                                                                                                                                                                                                       | 1.139 | 0.962 | 1.02  | 1.073 |
| gi 335289671 ref XP_003355<br>951.1    | PREDICTED: transcription<br>elongation factor SPT5 isoform 3<br>[Sus<br>scrofa] >gi 335289667 ref XP_00335<br>5949.1  PREDICTED: transcription<br>elongation factor SPT5 isoform 1<br>[Sus<br>scrofa] >gi 335289669 ref XP_00335<br>5950.1  PREDICTED: transcription<br>elongation fac | 0.921 | 1.108 | 1.49  | 0.892 |
| gi 311249625 ref XP_003123<br>708.1    | PREDICTED: FAS-associated factor<br>2 [Sus scrofa]                                                                                                                                                                                                                                     | 0.689 | 0.734 | 1.36  | 0.551 |
| gi 350581449 ref XP_003481<br>037.1    | PREDICTED: guanine<br>nucleotide-binding protein<br>G(I)/G(S)/G(T) subunit beta-2-like<br>[Sus<br>scrofa] >gi 311251041 ref XP_00312<br>4417.1  PREDICTED: guanine                                                                                                                     | 1.102 | 0.709 | 0.749 | 0.867 |



|                                 |                                                                                                                                                                                                                                                                               |       |       |       |       |
|---------------------------------|-------------------------------------------------------------------------------------------------------------------------------------------------------------------------------------------------------------------------------------------------------------------------------|-------|-------|-------|-------|
|                                 | nucleotide-binding protein<br>G(I)/G(S)/G(T) subunit beta-2-like<br>isoform 2 [Sus scrofa]                                                                                                                                                                                    |       |       |       |       |
| gi 311259100 ref XP_003127931.1 | PREDICTED: meprin A subunit beta<br>[Sus scrofa]                                                                                                                                                                                                                              | 0.371 | 0.316 | 0.293 | 0.284 |
| gi 350579827 ref XP_003480692.1 | PREDICTED: LOW QUALITY<br>PROTEIN: nucleosome assembly<br>protein 1-like 4-like [Sus scrofa]                                                                                                                                                                                  | 1.236 | 1.033 | 1.196 | 1.168 |
| gi 356650697 gb AET34758.1      | nucleosome assembly protein 1-like 4<br>[Sus scrofa]                                                                                                                                                                                                                          |       |       |       |       |
| gi 343887420 ref NP_001230609.1 | transcription elongation factor A<br>protein 1 [Sus scrofa]                                                                                                                                                                                                                   | 0.935 | 1.433 | 1.33  | 0.857 |
| gi 343780936 ref NP_001230484.1 | heterogeneous nuclear<br>ribonucleoprotein H3 [Sus scrofa]                                                                                                                                                                                                                    | 0.699 | 0.934 | 1.088 | 0.843 |
| gi 194042010 ref XP_001924773.1 | PREDICTED: gamma-adducin<br>isoform 1 [Sus scrofa]                                                                                                                                                                                                                            | 0.896 | 0.415 | 0.659 | 1.128 |
| gi 194042012 ref XP_001924864.1 | PREDICTED: gamma-adducin<br>isoform 3 [Sus<br>scrofa] >gi 335302227 ref XP_003359413.1  PREDICTED:<br>gamma-adducin [Sus scrofa]                                                                                                                                              |       |       |       |       |
| gi 335306217 ref XP_003360420.1 | PREDICTED: 60S ribosomal protein<br>L9-like [Sus scrofa]                                                                                                                                                                                                                      | 1.077 | 0.628 | 0.964 | 1.517 |
| gi 343478291 ref NP_001230410.1 | ribosomal protein L9 [Sus scrofa]                                                                                                                                                                                                                                             |       |       |       |       |
| gi 350594715 ref XP_001927122.3 | PREDICTED: adipocyte plasma<br>membrane-associated protein-like<br>[Sus scrofa]                                                                                                                                                                                               | 0.721 | 0.215 | 0.2   | 0.678 |
| gi 335293615 ref XP_003357006.1 | PREDICTED:<br>UDP-glucuronosyltransferase 2A1<br>[Sus scrofa]                                                                                                                                                                                                                 | 0.731 | 0.513 | 0.642 | 0.911 |
| gi 127804 sp P26429.1 SC5A1_PIG | RecName: Full=Sodium/glucose<br>cotransporter 1; Short=Na(+)/glucose<br>cotransporter 1; AltName: Full=High<br>affinity sodium-glucose<br>cotransporter; AltName: Full=Solute<br>carrier family 5 member<br>1 >gi 164675 gb AAA31122.1 <br>Na+/glucose cotransporter (SGLT1), | 1.227 | 0.435 | 0.562 | 0.89  |
| gi 255683521 ref NP_001157493.1 | sodium/glucose cotransporter 1 [Sus<br>scrofa]                                                                                                                                                                                                                                |       |       |       |       |
| gi 335297787 ref XP_003131      | PREDICTED: puromycin-sensitive                                                                                                                                                                                                                                                | 1.467 | 0.977 | 0.697 | 1.664 |

|                                 |                                                                                                                                                                                                                                                           |       |       |       |       |
|---------------------------------|-----------------------------------------------------------------------------------------------------------------------------------------------------------------------------------------------------------------------------------------------------------|-------|-------|-------|-------|
| 575.2                           | aminopeptidase isoform 1 [Sus scrofa]                                                                                                                                                                                                                     |       |       |       |       |
| gi 350593466 ref XP_003359556.2 | PREDICTED: UDP-glucose:glycoprotein glucosyltransferase 1 [Sus scrofa]                                                                                                                                                                                    | 1.622 | 0.511 | 0.758 | 1.28  |
| gi 1165145 emb CAA64477.1       | annexin I [Sus scrofa]                                                                                                                                                                                                                                    | 0.423 | 0.578 | 0.912 | 0.848 |
| gi 13399613 pdb 1HM6 A          | Chain A, X-Ray Structure Of Full-Length Annexin 1 >gi 28948618 pdb 1MCX A Chain A, Structure Of Full-Length Annexin A1 In The Presence Of Calcium >gi 13399614 pdb 1HM6 B Chain B, X-Ray Structure Of Full-Length Annexin 1                               |       |       |       |       |
| gi 255683368 ref NP_001157470.1 | annexin A1 [Sus scrofa] >gi 20141168 sp P19619.3 ANXA1_PIG RecName: Full=Annexin A1; AltName: Full=Annexin I; AltName: Full=Annexin-1; AltName: Full=Calpactin II; AltName: Full=Calpactin-2; AltName: Full=Chromobindin-9; AltName: Full=Lipocortin I; A |       |       |       |       |
| gi 343183313 ref NP_001230231.1 | gephyrin [Sus scrofa]                                                                                                                                                                                                                                     | 1.148 | 1.148 | 1.4   | 1.115 |
| gi 350584292 ref XP_003481715.1 | PREDICTED: dynamin 1-like [Sus scrofa]                                                                                                                                                                                                                    | ---   | ---   | ---   | ---   |
| gi 350597090 ref XP_003484356.1 | PREDICTED: dynamin-1-like protein-like, partial [Sus scrofa]                                                                                                                                                                                              |       |       |       |       |
| gi 194038067 ref XP_001927944.1 | PREDICTED: protein DEK isoform 1 [Sus scrofa]                                                                                                                                                                                                             | 0.564 | 0.737 | 1.077 | 0.544 |
| gi 335291757 ref XP_003356581.1 | PREDICTED: protein DEK [Sus scrofa]                                                                                                                                                                                                                       |       |       |       |       |
| gi 335291759 ref XP_003356582.1 | PREDICTED: protein DEK [Sus scrofa]                                                                                                                                                                                                                       |       |       |       |       |
| gi 350587196 ref XP_003482363.1 | PREDICTED: tryptophanyl-tRNA synthetase, cytoplasmic-like isoform 2 [Sus scrofa] >gi 350587194 ref XP_003128776.3  PREDICTED: tryptophanyl-tRNA synthetase, cytoplasmic-like isoform 1 [Sus                                                               | 1.241 | 0.79  | 0.815 | 0.894 |

|                                 |                                                                                                                                                                                   |       |       |       |       |
|---------------------------------|-----------------------------------------------------------------------------------------------------------------------------------------------------------------------------------|-------|-------|-------|-------|
|                                 | scrofa]                                                                                                                                                                           |       |       |       |       |
| gi 350578528 ref XP_003480383.1 | PREDICTED: peptidyl-prolyl cis-trans isomerase B-like, partial [Sus scrofa]                                                                                                       | ---   | ---   | ---   | ---   |
| gi 2494023 sp Q29290.1 CYTB_PIG | RecName: Full=Cystatin-B; AltName: Full=Stefin-B                                                                                                                                  | 0.968 | 1.922 | 2.05  | 1.433 |
| gi 311259195 ref XP_003127983.1 | PREDICTED: plasminogen activator inhibitor 1 RNA-binding protein-like isoform 2 [Sus scrofa]                                                                                      | 1.114 | 1.411 | 1.334 | 1.164 |
| gi 311259199 ref XP_003127984.1 | PREDICTED: plasminogen activator inhibitor 1 RNA-binding protein-like isoform 3 [Sus scrofa]                                                                                      |       |       |       |       |
| gi 311259197 ref XP_003127982.1 | PREDICTED: plasminogen activator inhibitor 1 RNA-binding protein-like isoform 1 [Sus scrofa]                                                                                      |       |       |       |       |
| gi 335291374 ref XP_003356484.1 | PREDICTED: plasminogen activator inhibitor 1 RNA-binding protein-like [Sus scrofa]                                                                                                |       |       |       |       |
| gi 72535210 ref NP_001026967.1  | protein FADD [Sus scrofa] >gi 46397561 gb AAS91711.1  Fas-associating death domain-containing protein [Sus scrofa]                                                                | 1.231 | 0.704 | 1.654 | 0.722 |
| gi 350584002 ref XP_003126228.3 | PREDICTED: keratin, type I cytoskeletal 18 [Sus scrofa]                                                                                                                           | 0.903 | 0.753 | 0.534 | 0.611 |
| gi 335309807 ref XP_003361778.1 | PREDICTED: delta-aminolevulinic acid dehydratase-like, partial [Sus scrofa]                                                                                                       | 0.853 | 1.284 | 1.316 | 0.803 |
| gi 194044992 ref XP_001928105.1 | PREDICTED: sorting nexin-12 [Sus scrofa]                                                                                                                                          | 1.055 | 1.04  | 1.066 | 1.481 |
| gi 350586335 ref XP_003356548.2 | PREDICTED: nuclease-sensitive element-binding protein 1-like [Sus scrofa]                                                                                                         | 0.357 | 1.959 | 0.998 | 0.852 |
| gi 354549569 gb AER27829.1      | Y box binding protein 1 [Sus scrofa]                                                                                                                                              |       |       |       |       |
| gi 47523784 ref NP_999528.1     | 40S ribosomal protein S12 [Sus scrofa] >gi 1173191 sp P46405.2 RS12_PIG RecName: Full=40S ribosomal protein S12 >gi 872315 emb CAA55946.1  40S ribosomal protein S12 [Sus scrofa] | 0.974 | 1.068 | 0.878 | 1.607 |

|                                 |                                                                                                                                                                                                                                                          |       |       |       |       |
|---------------------------------|----------------------------------------------------------------------------------------------------------------------------------------------------------------------------------------------------------------------------------------------------------|-------|-------|-------|-------|
| gi 311260817 ref XP_001925607.2 | PREDICTED: protein PML isoform 1 [Sus scrofa]                                                                                                                                                                                                            | 0.605 | 0.668 | 0.609 | 0.849 |
| gi 335292411 ref XP_003356725.1 | PREDICTED: protein PML isoform 2 [Sus scrofa]                                                                                                                                                                                                            |       |       |       |       |
| gi 350596898 ref XP_003361788.2 | PREDICTED: GTP cyclohydrolase 1-like [Sus scrofa]                                                                                                                                                                                                        | ---   | ---   | ---   | ---   |
| gi 311247118 ref XP_003122486.1 | PREDICTED: NADH dehydrogenase [ubiquinone] flavoprotein 1, mitochondrial-like isoform 1 [Sus scrofa]                                                                                                                                                     | 1.053 | 0.587 | 0.656 | 0.836 |
| gi 311247120 ref XP_003122487.1 | PREDICTED: NADH dehydrogenase [ubiquinone] flavoprotein 1, mitochondrial-like isoform 2 [Sus scrofa]                                                                                                                                                     |       |       |       |       |
| gi 311262725 ref XP_003129324.1 | PREDICTED: inorganic pyrophosphatase 2, mitochondrial-like [Sus scrofa]                                                                                                                                                                                  | 1.016 | 1.01  | 0.817 | 0.985 |
| gi 335287403 ref XP_001927013.3 | PREDICTED: calcium-activated chloride channel regulator 4 [Sus scrofa]                                                                                                                                                                                   | 1.181 | 0.665 | 0.95  | 0.821 |
| gi 311253255 ref XP_003125488.1 | PREDICTED: alanine aminotransferase 1-like [Sus scrofa]                                                                                                                                                                                                  | 1.108 | 1.782 | 2.46  | 1.848 |
| gi 326633214 ref NP_001192023.1 | ubiquitin-conjugating enzyme E2 variant 1 [Sus scrofa]                                                                                                                                                                                                   | ---   | ---   | ---   | ---   |
| gi 335298430 ref XP_003131953.2 | PREDICTED: LOW QUALITY PROTEIN: mitochondrial 2-oxoglutarate/malate carrier protein [Sus scrofa]                                                                                                                                                         | 0.922 | 0.612 | 0.416 | 0.502 |
| gi 311250943 ref XP_003124353.1 | PREDICTED: 28 kDa heat- and acid-stable phosphoprotein-like [Sus scrofa]                                                                                                                                                                                 | 0.855 | 1.997 | 1.66  | 1.733 |
| gi 47522750 ref NP_999125.1     | voltage-dependent anion-selective channel protein 1 [Sus scrofa] >gi 75050406 sp Q9MZ16.3 VDAC1_PIG RecName: Full=Voltage-dependent anion-selective channel protein 1; Short=VDAC-1 >gi 8745552 gb AAF78963.1 AF268461_1 voltage-dependent anion channel | 0.661 | 0.45  | 0.434 | 0.729 |
| gi 24987656 pdb 1LXE A          | Chain A, Crystal Structure Of The Cathelicidin Motif Of Protegrins >gi 24987482 pdb 1KWI A                                                                                                                                                               | 0.329 | 1.16  | 0.826 | 2.176 |

|                                   |                                                                                                                                                                                                                                                           |       |       |       |       |
|-----------------------------------|-----------------------------------------------------------------------------------------------------------------------------------------------------------------------------------------------------------------------------------------------------------|-------|-------|-------|-------|
|                                   | Chain A, Crystal Structure Analysis Of The Cathelicidin Motif Of Protegrins                                                                                                                                                                               |       |       |       |       |
| gi 159162733 pdb 1N5P A           | Chain A, Solution Structure Of The Cathelin-Like Domain Of Protegrins (All Amide Bonds Involving Proline Residues Are In Trans Conformation) >gi 159162732 pdb 1N5H A Chain A, Solution Structure Of The Cathelin-Like Domain Of Protegrins (The R87-P88  |       |       |       |       |
| gi 52000924 sp Q29238.2 CLIC1_PIG | RecName: Full=Chloride intracellular channel protein 1; AltName: Full=Nuclear chloride ion channel 27                                                                                                                                                     | 1.73  | 0.733 | 0.748 | 1.761 |
| gi 194036322 ref XP_001928206.1   | PREDICTED: Na(+)/H(+) exchange regulatory cofactor NHE-RF3 isoform 1 [Sus scrofa] >gi 194036324 ref XP_001928212.1  PREDICTED: Na(+)/H(+) exchange regulatory cofactor NHE-RF3 isoform 2 [Sus scrofa]                                                     | 1.081 | 1.545 | 1.68  | 1.125 |
| gi 156120152 ref NP_001095294.1   | complement factor B precursor [Sus scrofa] >gi 148724909 emb CAN87697.1  B-factor, properdin [Sus scrofa]                                                                                                                                                 | 1.303 | 0.829 | 0.753 | 1.237 |
| gi 162138242 gb ABX82825.1        | complement factor B [Sus scrofa]                                                                                                                                                                                                                          |       |       |       |       |
| gi 335290029 ref XP_003356052.1   | PREDICTED: nuclear pore glycoprotein p62 [Sus scrofa]                                                                                                                                                                                                     | 0.611 | 0.516 | 0.685 | 0.524 |
| gi 335294212 ref XP_003129427.2   | PREDICTED: 60S ribosomal protein L27a-like isoform 1 [Sus scrofa]                                                                                                                                                                                         | 1.376 | 0.517 | 0.659 | 0.736 |
| gi 350588060 ref XP_003482544.1   | PREDICTED: 60S ribosomal protein L27a-like [Sus scrofa]                                                                                                                                                                                                   |       |       |       |       |
| gi 56404320 sp Q6PWT7.1 CCS_PIG   | RecName: Full=Copper chaperone for superoxide dismutase; AltName: Full=Superoxide dismutase copper chaperone >gi 49274647 ref NP_001001866.1  copper chaperone for superoxide dismutase [Sus scrofa] >gi 46395042 gb AAS91658.1  superoxide dismutase cop | 1.032 | 1.247 | 1.516 | 1.198 |
| gi 262399411 ref NP_001161062.1   | uncharacterized protein C14orf142 homolog [Sus scrofa] >gi 212288175 sp P0C8B5.1                                                                                                                                                                          | 1.721 | 2.291 | 2.179 | 1.65  |

|                                 |                                                                                                                                                |       |       |       |       |
|---------------------------------|------------------------------------------------------------------------------------------------------------------------------------------------|-------|-------|-------|-------|
|                                 | CN142_PIG RecName:<br>Full=Uncharacterized protein<br>C14orf142 homolog                                                                        |       |       |       |       |
| gi 335293826 ref XP_003357065.1 | PREDICTED: LOW QUALITY PROTEIN: short coiled-coil protein-like [Sus scrofa]                                                                    | 0.372 | 3.119 | 1.888 | 0.975 |
| gi 329663948 ref NP_001192334.1 | ras GTPase-activating protein-binding protein 1 [Sus scrofa]                                                                                   | 0.664 | 0.971 | 1.069 | 0.932 |
| gi 350587586 ref XP_003129077.3 | PREDICTED: hypothetical protein LOC100522154 [Sus scrofa]                                                                                      | 1.027 | 1.932 | 2.369 | 1.379 |
| gi 350586208 ref XP_003128041.3 | PREDICTED: epidermal growth factor receptor substrate 15 [Sus scrofa]                                                                          | 0.871 | 1.063 | 0.837 | 0.912 |
| gi 555827 gb AAA65943.1         | immunoglobulin alpha heavy chain constant region, partial [Sus scrofa] >gi 2136551 pir  I47175 Ig alpha chain C region - pig (fragment)        | 0.72  | 0.817 | 1.044 | 1.378 |
| gi 290578621 gb ADD51207.1      | immunoglobulin IgA heavy chain constant region [Sus scrofa]                                                                                    |       |       |       |       |
| gi 311250752 ref XP_003124284.1 | PREDICTED: NACHT, LRR and PYD domains-containing protein 6 [Sus scrofa]                                                                        | 1     | 2.178 | 1.782 | 1.213 |
| gi 311249251 ref XP_003123542.1 | PREDICTED: 6-phosphogluconolactonase-like [Sus scrofa]                                                                                         | 1.405 | 0.796 | 0.756 | 1.009 |
| gi 197251940 ref NP_001127829.1 | actin-related protein 2/3 complex subunit 5 [Sus scrofa] >gi 195562237 gb ACG50185.1  actin related protein 2/3 complex subunit 5 [Sus scrofa] | 0.9   | 1.278 | 0.982 | 1.803 |
| gi 311260144 ref XP_003128362.1 | PREDICTED: butyrophilin subfamily 1 member A1-like [Sus scrofa]                                                                                | ---   | ---   | ---   | ---   |
| gi 350586520 ref XP_003128365.3 | PREDICTED: butyrophilin subfamily 1 member A1-like [Sus scrofa]                                                                                |       |       |       |       |
| gi 350586522 ref XP_003482204.1 | PREDICTED: butyrophilin subfamily 1 member A1-like [Sus scrofa]                                                                                |       |       |       |       |
| gi 350581286 ref XP_003124146.3 | PREDICTED: hypothetical protein LOC100516425 [Sus scrofa]                                                                                      | 1.102 | 1.883 | 1.285 | 1.111 |
| gi 350580953 ref XP_003354274.2 | PREDICTED: 60S acidic ribosomal protein P1-like [Sus scrofa]                                                                                   | 0.421 | 1.608 | 1.595 | 0.92  |
| gi 47522916 ref NP_999215.1     | glutathione S-transferase omega-1 [Sus                                                                                                         | 1.41  | 0.791 | 0.625 | 1.755 |

|                                 |                                                                                                                                                                                                                                                           |       |       |       |       |
|---------------------------------|-----------------------------------------------------------------------------------------------------------------------------------------------------------------------------------------------------------------------------------------------------------|-------|-------|-------|-------|
|                                 | scrofa] >gi 20141290 sp Q9N1F5.2 GSTO1_PIG RecName: Full=Glutathione S-transferase omega-1; Short=GSTO-1; AltName: Full=Glutathione S-transferase omega 1-1; Short=GSTO 1-1; AltName: Full=Glutathione-dependent d                                        |       |       |       |       |
| gi 335293690 ref XP_003129163.2 | PREDICTED: general vesicular transport factor p115-like [Sus scrofa]                                                                                                                                                                                      | 0.836 | 2.522 | 2.176 | 1.516 |
| gi 47523794 ref NP_999534.1     | voltage-dependent anion-selective channel protein 2 [Sus scrofa] >gi 75050405 sp Q9MZ15.1 VDAC2_PIG RecName: Full=Voltage-dependent anion-selective channel protein 2; Short=VDAC-2 >gi 8745554 gb AAF78964.1 AF268462_1 voltage-dependent anion channel  | 0.872 | 0.478 | 0.433 | 0.922 |
| gi 343432604 ref NP_001230320.1 | ubiquitin-conjugating enzyme E2 variant 2 [Sus scrofa]                                                                                                                                                                                                    | ---   | ---   | ---   | ---   |
| gi 335291035 ref XP_003127861.2 | PREDICTED: polyadenylate-binding protein 4 isoform 1 [Sus scrofa]                                                                                                                                                                                         | ---   | ---   | ---   | ---   |
| gi 350585908 ref XP_003482078.1 | PREDICTED: polyadenylate-binding protein 4 isoform 2 [Sus scrofa]                                                                                                                                                                                         |       |       |       |       |
| gi 350586828 ref XP_003482286.1 | PREDICTED: paired amphipathic helix protein Sin3a-like isoform 2 [Sus scrofa] >gi 335292401 ref XP_003356722.1  PREDICTED: paired amphipathic helix protein Sin3a-like isoform 1 [Sus scrofa]                                                             | 1.135 | 1.157 | 2.238 | 1.077 |
| gi 5542425 pdb 1QPW D           | Chain D, Crystal Structure Determination Of Porcine Hemoglobin At 1.8a Resolution >gi 5542423 pdb 1QPW B Chain B, Crystal Structure Determination Of Porcine Hemoglobin At 1.8a Resolution >gi 809285 pdb 2PGH D Chain D, Structure Determination Of Aquo | 0.842 | 0.728 | 0.606 | 0.619 |
| gi 402550453 pdb 4F4O H         | Chain H, Structure Of The Haptoglobin-Haemoglobin                                                                                                                                                                                                         |       |       |       |       |

|                                  |                                                                                                                                                                                                                                                           |       |       |       |       |
|----------------------------------|-----------------------------------------------------------------------------------------------------------------------------------------------------------------------------------------------------------------------------------------------------------|-------|-------|-------|-------|
|                                  | Complex >gi 402550447 pdb 4F4O B Chain B, Structure Of The Haptoglobin-Haemoglobin Complex >gi 402550456 pdb 4F4O K Chain K, Structure Of The Haptoglobin-Haemoglobin Complex >gi 402550450 pdb 4F4O E                                                    |       |       |       |       |
| gi 261245058 ref NP_001138313.1  | hemoglobin subunit beta [Sus scrofa] >gi 3041678 sp P02067.3 HB B_PIG RecName: Full=Hemoglobin subunit beta; AltName: Full=Beta-globin; AltName: Full=Hemoglobin beta chain >gi 806381 emb CAA60490.1  beta-globin [Sus scrofa]                           |       |       |       |       |
| gi 120564455 gb ABM30153.1       | beta-globin [Sus scrofa]                                                                                                                                                                                                                                  |       |       |       |       |
| gi 1900 emb CAA27575.1           | unnamed protein product [Sus scrofa]                                                                                                                                                                                                                      | 1.005 | 0.503 | 0.769 | 1.152 |
| gi 335892232 pdb 3N2F B          | Chain B, Crystal Structure Of The Sodium-Potassium Pump >gi 335892235 pdb 3N2F D Chain D, Crystal Structure Of The Sodium-Potassium Pump >gi 319443575 pdb 3N23 D Chain D, Crystal Structure Of The High Affinity Complex Between Ouabain And The E2p For |       |       |       |       |
| gi 48374077 ref NP_001001542.1   | sodium/potassium-transporting ATPase subunit beta-1 [Sus scrofa] >gi 164380 gb AAA31001.1  Na+, K+-ATPase [Sus scrofa]                                                                                                                                    |       |       |       |       |
| gi 1703469 sp P05027.2 AT1B1_PIG | RecName: Full=Sodium/potassium-transporting ATPase subunit beta-1; AltName: Full=Sodium/potassium-dependent ATPase subunit beta-1 >gi 225192 prf 1211232A ATPase beta,Na/K >gi 1902 emb CAA28301.1  unnamed protein product [Sus scrofa]                  |       |       |       |       |
| gi 288965538 pdb 3KDP D          | Chain D, Crystal Structure Of The Sodium-Potassium                                                                                                                                                                                                        |       |       |       |       |



|                                 |                                                                                                                                                                                                                                                           |       |       |       |       |
|---------------------------------|-----------------------------------------------------------------------------------------------------------------------------------------------------------------------------------------------------------------------------------------------------------|-------|-------|-------|-------|
|                                 | Pump >gi 288965535 pdb 3KDP B Chain B, Crystal Structure Of The Sodium-Potassium Pump                                                                                                                                                                     |       |       |       |       |
| gi 114326183 ref NP_001041537.1 | ADP-ribosylation factor 4 [Sus scrofa] >gi 221327932 gb ACM17702.1  ADP-ribosylation factor 4 [Sus scrofa] >gi 203283175 gb ACH96700.1  ADP-ribosylation factor 4 [Sus scrofa] >gi 62208269 gb AAX77012.1  ADP-ribosylation factor family-like protein [S | 0.686 | 0.442 | 0.301 | 0.822 |
| gi 350582454 ref XP_003125231.3 | PREDICTED: LOW QUALITY PROTEIN: leucine-rich PPR motif-containing protein, mitochondrial [Sus scrofa]                                                                                                                                                     | 1.183 | 0.968 | 0.808 | 1.206 |
| gi 311248919 ref XP_003123379.1 | PREDICTED: protein Hook homolog 2 [Sus scrofa]                                                                                                                                                                                                            | ---   | ---   | ---   | ---   |
| gi 311259611 ref XP_003128182.1 | PREDICTED: 40S ribosomal protein S5-like isoform 2 [Sus scrofa] >gi 311259613 ref XP_003128181.1  PREDICTED: 40S ribosomal protein S5-like isoform 1 [Sus scrofa]                                                                                         | 1.156 | 0.55  | 0.608 | 1.144 |
| gi 335290571 ref XP_003356212.1 | PREDICTED: UPF0485 protein C1orf144 homolog isoform 2 [Sus scrofa]                                                                                                                                                                                        | 0.702 | 1.491 | 1.375 | 0.757 |
| gi 47522846 ref NP_999175.1     | ATP-binding cassette sub-family G member 2 [Sus scrofa] >gi 68051987 sp Q8MIB3.1 ABC2_PIG RecName: Full=ATP-binding cassette sub-family G member 2; AltName: Full=Brain multidrug resistance protein; AltName: CD_antigen=CD338 >gi 21530795 emb CAD1278  | 1.247 | 0.674 | 0.582 | 0.785 |
| gi 350592328 ref XP_001926837.4 | PREDICTED: kinesin family member 13B [Sus scrofa]                                                                                                                                                                                                         | 1.331 | 1.467 | 1.406 | 1.294 |
| gi 103472127 ref NP_001033715.2 | aldo-keto reductase family 1, member C-like 1 [Sus scrofa] >gi 94421332 gb ABF18834.1  putative aldo-keto reductase family 1 member C4 [Sus scrofa]                                                                                                       | 1.037 | 1.744 | 2.546 | 3.783 |
| gi 158148957 dbj BAF82012.      | aldo-keto reductase [Sus                                                                                                                                                                                                                                  |       |       |       |       |

|                                 |                                                                                                                                                                                                                                                           |       |       |       |       |
|---------------------------------|-----------------------------------------------------------------------------------------------------------------------------------------------------------------------------------------------------------------------------------------------------------|-------|-------|-------|-------|
| 1                               | scrofa] >gi 61741954 gb AAX54862.1  prostaglandin F synthase [Sus scrofa]                                                                                                                                                                                 |       |       |       |       |
| gi 178056496 ref NP_001116547.1 | aldo-keto reductase family 1 member C4 [Sus scrofa] >gi 94962086 gb ABF48390.1  aldo-keto reductase family 1 member C4 [Sus scrofa]                                                                                                                       |       |       |       |       |
| gi 350586674 ref XP_001929500.4 | PREDICTED: exportin-5 [Sus scrofa]                                                                                                                                                                                                                        | 0.936 | 0.699 | 0.653 | 1.018 |
| gi 335292368 ref XP_001926489.3 | PREDICTED: calcium and integrin-binding protein 1 [Sus scrofa]                                                                                                                                                                                            | 0.454 | 0.7   | 0.817 | 0.648 |
| gi 38569723 gb AAR24382.1       | GDP dissociation inhibitor 2 [Sus scrofa]                                                                                                                                                                                                                 | ---   | ---   | ---   | ---   |
| gi 350276172 ref NP_001231880.1 | leucine-rich repeat-containing protein 59 [Sus scrofa]                                                                                                                                                                                                    | 0.495 | 0.761 | 0.604 | 0.665 |
| gi 89573851 gb ABD77151.1       | succinate dehydrogenase complex subunit B [Sus scrofa]                                                                                                                                                                                                    | 0.734 | 0.37  | 0.483 | 0.563 |
| gi 322812295 pdb 3AE8 B         | Chain B, Crystal Structure Of Porcine Heart Mitochondrial Complex Ii Bound With N-(3-Isopropoxy-Phenyl)-2-Trifluoromethylbenzamide >gi 322812327 pdb 3AEG B Chain B, Crystal Structure Of Porcine Heart Mitochondrial Complex Ii Bound With N-Biphenyl-3- |       |       |       |       |
| gi 345531797 pdb 3SFE B         | Chain B, Crystal Structure Of Porcine Mitochondrial Respiratory Complex Ii Bound With Oxaloacetate And Thiabendazole >gi 345531793 pdb 3SFD B Chain B, Crystal Structure Of Porcine Mitochondrial Respiratory Complex Ii Bound With Oxaloacetate And Pent |       |       |       |       |
| gi 157279735 ref NP_001098423.1 | succinate dehydrogenase [ubiquinone] iron-sulfur subunit, mitochondrial precursor [Sus scrofa] >gi 122131481 sp Q007T0.1  DHSB_PIG RecName: Full=Succinate dehydrogenase [ubiquinone] iron-sulfur subunit,                                                |       |       |       |       |

|                                 |                                                                                                                                                                                                                                                           |       |       |       |       |
|---------------------------------|-----------------------------------------------------------------------------------------------------------------------------------------------------------------------------------------------------------------------------------------------------------|-------|-------|-------|-------|
|                                 | mitochondrial; AltName: Full=Iron-sulfur subuni                                                                                                                                                                                                           |       |       |       |       |
| gi 50262041 gb AAT72764.1       | fatty acid binding protein 3, partial [Sus scrofa]                                                                                                                                                                                                        | 1.966 | 1.67  | 1.37  | 2.192 |
| gi 374637318 gb AEZ54788.1      | heart fatty acid-binding protein [Sus scrofa]                                                                                                                                                                                                             |       |       |       |       |
| gi 198250386 gb ACH85195.1      | fatty acid binding protein 3 [Sus scrofa]                                                                                                                                                                                                                 |       |       |       |       |
| gi 148792972 gb ABR12603.1      | heart fatty acid-binding protein [Sus scrofa]                                                                                                                                                                                                             |       |       |       |       |
| gi 172073181 ref NP_001093401.1 | fatty acid-binding protein, heart [Sus scrofa] >gi 2811020 sp O02772.3 FABPH_PIG RecName: Full=Fatty acid-binding protein, heart; AltName: Full=Fatty acid-binding protein 3; AltName: Full=Heart-type fatty acid-binding protein; Short=H-FABP >gi 30237 |       |       |       |       |
| gi 224994935 gb ACN76574.1      | fatty acid-binding protein 3 [Sus scrofa]                                                                                                                                                                                                                 |       |       |       |       |
| gi 266018 gb AAB25484.1         | calmodulin=low affinity vasoactive intestinal polypeptide binding protein [swine, liver, Peptide Partial, 34 aa]                                                                                                                                          | 1.397 | 2.473 | 2.726 | 4.203 |
| gi 343790897 ref NP_001230506.1 | eukaryotic translation initiation factor [Sus scrofa]                                                                                                                                                                                                     | ---   | ---   | ---   | ---   |
| gi 335284027 ref XP_003354495.1 | PREDICTED: LOW QUALITY PROTEIN: brain-specific angiogenesis inhibitor 1-associated protein 2-like protein 1-like [Sus scrofa]                                                                                                                             | ---   | ---   | ---   | ---   |
| gi 311259030 ref XP_003127902.1 | PREDICTED: small nuclear ribonucleoprotein Sm D1-like [Sus scrofa]                                                                                                                                                                                        | 1.41  | 1.528 | 1.301 | 0.682 |
| gi 47522948 ref NP_999231.1     | D-amino-acid oxidase [Sus scrofa] >gi 129305 sp P00371.2 OXDA_PIG RecName: Full=D-amino-acid oxidase; Short=DAAO; Short=DAMOX; Short=DAO >gi 164306 gb AAA30985.1  D-amino acid oxidase [Sus scrofa] >gi 48425898 pdb 1VE9 A Chain A, Porcine Kidney D-Am | 1.109 | 0.677 | 0.555 | 0.816 |
| gi 335310745 ref XP_003125      | PREDICTED: hypothetical protein                                                                                                                                                                                                                           | 1.353 | 1.643 | 1.34  | 1.558 |

|                                 |                                                                                                                                                                                            |       |       |       |       |
|---------------------------------|--------------------------------------------------------------------------------------------------------------------------------------------------------------------------------------------|-------|-------|-------|-------|
| 987.2                           | LOC100515435, partial [Sus scrofa]                                                                                                                                                         |       |       |       |       |
| gi 350582854 ref XP_003481372.1 | PREDICTED: elongation factor 1-delta-like isoform 1 [Sus scrofa]                                                                                                                           |       |       |       |       |
| gi 350582856 ref XP_003481373.1 | PREDICTED: elongation factor 1-delta-like isoform 2 [Sus scrofa]                                                                                                                           |       |       |       |       |
| gi 335279372 ref XP_003121421.2 | PREDICTED: LOW QUALITY PROTEIN: myristoylated alanine-rich C-kinase substrate-like [Sus scrofa]                                                                                            | 0.352 | 0.423 | 0.313 | 0.457 |
| gi 356582293 ref NP_001239141.1 | DEAH (Asp-Glu-Ala-His) box polypeptide 15 [Sus scrofa]                                                                                                                                     | 0.875 | 0.801 | 0.869 | 1.207 |
| gi 335286637 ref XP_001927783.3 | PREDICTED: nitrilase homolog 1 isoform 2 [Sus scrofa]                                                                                                                                      | 1.142 | 1.595 | 1.118 | 0.932 |
| gi 335290948 ref XP_003356342.1 | PREDICTED: uncharacterized protein KIAA1522-like [Sus scrofa]                                                                                                                              |       |       |       |       |
| gi 335293906 ref XP_003129266.2 | PREDICTED: annexin A5-like [Sus scrofa]                                                                                                                                                    | 0.335 | 0.364 | 0.348 | 0.325 |
| gi 350586356 ref XP_003482168.1 | PREDICTED: ribosylidihyronicotinamide dehydrogenase [quinone]-like [Sus scrofa]                                                                                                            | 1.234 | 0.977 | 1.294 | 0.558 |
| gi 311246132 ref XP_003122091.1 | PREDICTED: 39S ribosomal protein L50, mitochondrial-like [Sus scrofa]                                                                                                                      | 0.428 | 0.347 | 0.475 | 0.429 |
| gi 350536531 ref NP_001233199.1 | phosphatidylinositol-binding clathrin assembly protein [Sus scrofa] >gi 338784421 gb AEI98873.1  phosphatidylinositol-binding clathrin assembly protein [Sus scrofa]                       | 1.507 | 2.488 | 4.681 | 1.808 |
| gi 350596835 ref XP_003361703.2 | PREDICTED: phosphatidylinositol-binding clathrin assembly protein-like [Sus scrofa]                                                                                                        |       |       |       |       |
| gi 335310931 ref XP_003362256.1 | PREDICTED: vacuolar protein sorting-associated protein 35 [Sus scrofa]                                                                                                                     | 2.403 | 0.722 | 1.158 | 1.45  |
| gi 335307273 ref XP_003360776.1 | PREDICTED: mitogen-activated protein kinase 3, partial [Sus scrofa]                                                                                                                        | 4.06  | 0.684 | 0.408 | 0.44  |
| gi 164664456 ref NP_001106915.1 | F-actin-capping protein subunit beta [Sus scrofa] >gi 148613359 gb ABQ96223.1  F-actin capping protein beta subunit [Sus scrofa] >gi 148613353 gb ABQ96220.1  F-actin capping protein beta | 2.198 | 0.855 | 0.819 | 1.465 |

|                                 |                                                                                                                                                                                                                                                      |       |       |       |       |
|---------------------------------|------------------------------------------------------------------------------------------------------------------------------------------------------------------------------------------------------------------------------------------------------|-------|-------|-------|-------|
|                                 | subunit [Sus scrofa]                                                                                                                                                                                                                                 |       |       |       |       |
| gi 270000214 gb ACZ57956.1      | F-actin capping protein beta subunit variant I [Sus scrofa]                                                                                                                                                                                          |       |       |       |       |
| gi 270000216 gb ACZ57957.1      | F-actin capping protein beta subunit variant II [Sus scrofa]                                                                                                                                                                                         |       |       |       |       |
| gi 148222609 ref NP_001090925.1 | F-actin-capping protein subunit beta [Sus scrofa] >gi 134035396 sp A0PFK7.1  CAPZB_PIG RecName: Full=F-actin-capping protein subunit beta; AltName: Full=CapZ beta >gi 118627576 emb CAL69437.1  F-actin capping protein subunit beta 1 [Sus scrofa] |       |       |       |       |
| gi 346986241 ref NP_001231394.1 | neurocalcin delta [Sus scrofa] >gi 346986243 ref NP_001231395.1  neurocalcin delta [Sus scrofa]                                                                                                                                                      | 1.329 | 2.765 | 2.675 | 1.757 |
| gi 335294002 ref XP_003357106.1 | PREDICTED: 3-hydroxybutyrate dehydrogenase type 2-like isoform 2 [Sus scrofa] >gi 335294000 ref XP_003129333.2  PREDICTED: 3-hydroxybutyrate dehydrogenase type 2-like isoform 1 [Sus scrofa]                                                        | 2.36  | 0.622 | 0.791 | 1.663 |
| gi 335300663 ref XP_003358983.1 | PREDICTED: trifunctional purine biosynthetic protein adenosine-3-like [Sus scrofa]                                                                                                                                                                   | 1.521 | 1.571 | 0.85  | 1.601 |
| gi 335289705 ref XP_003355965.1 | PREDICTED: flavin reductase-like [Sus scrofa]                                                                                                                                                                                                        | 1.05  | 1.11  | 1.107 | 1.542 |
| gi 311261216 ref XP_001924364.2 | PREDICTED: c-1-tetrahydrofolate synthase, cytoplasmic [Sus scrofa]                                                                                                                                                                                   | 1.698 | 0.908 | 0.953 | 1.733 |
| gi 311271203 ref XP_001925518.2 | PREDICTED: ras-related protein Rab-4A-like [Sus scrofa]                                                                                                                                                                                              | ---   | ---   | ---   | ---   |
| gi 350585214 ref XP_003481903.1 | PREDICTED: ras-related protein Rab-4B-like [Sus scrofa] >gi 311257582 ref XP_003127192.1  PREDICTED: ras-related protein Rab-4B-like isoform 2 [Sus scrofa]                                                                                          |       |       |       |       |
| gi 106073274 gb ABF81975.1      | hypothetical protein [Sus scrofa]                                                                                                                                                                                                                    | 1.521 | 1.032 | 1.234 | 1.545 |
| gi 172072661 ref NP_001116458.1 | tRNA-splicing ligase RtcB homolog [Sus                                                                                                                                                                                                               |       |       |       |       |

|                                 |                                                                                                                                                                                                                                  |       |       |       |       |
|---------------------------------|----------------------------------------------------------------------------------------------------------------------------------------------------------------------------------------------------------------------------------|-------|-------|-------|-------|
|                                 | scrofa] >gi 118573909 sp Q19PY3.1 RTCB_PIG RecName: Full=tRNA-splicing ligase RtcB homolog >gi 106073298 gb ABF81976.1  hypothetical protein [Sus scrofa]                                                                        |       |       |       |       |
| gi 335289428 ref XP_003127055.2 | PREDICTED: hypothetical protein LOC100523791 [Sus scrofa]                                                                                                                                                                        | 1.451 | 1.827 | 2.253 | 1.323 |
| gi 347349312 gb AEO80316.1      | programmed cell death protein 5 [Sus scrofa]                                                                                                                                                                                     |       |       |       |       |
| gi 329663924 ref NP_001192332.1 | tubulin-folding cofactor B-like [Sus scrofa] >gi 24528346 emb CAD56044.1  cytoskeleton-associated protein 1 [Sus scrofa]                                                                                                         | 1.001 | 1.31  | 1.194 | 1.124 |
| gi 350584424 ref XP_003126577.3 | PREDICTED: chromodomain-helicase-DNA-binding protein 4 [Sus scrofa]                                                                                                                                                              | 0.602 | 0.885 | 0.588 | 0.978 |
| gi 178056560 ref NP_001116630.1 | phosphoenolpyruvate carboxykinase, cytosolic [Sus scrofa] >gi 238863890 gb ACR66221.1  phosphoenolpyruvate carboxykinase 1 [Sus scrofa] >gi 147223435 emb CAN13128.1  phosphoenolpyruvate carboxykinase 1 (soluble) [Sus scrofa] | 2.378 | 0.556 | 0.615 | 0.866 |
| gi 350595271 ref XP_003134762.3 | PREDICTED: hypothetical protein LOC100521760 [Sus scrofa]                                                                                                                                                                        | 1.787 | 1.246 | 1.2   | 1.484 |
| gi 335310107 ref XP_003361890.1 | PREDICTED: non-POU domain-containing octamer-binding protein [Sus scrofa]                                                                                                                                                        | 1.266 | 0.594 | 0.636 | 0.877 |
| gi 194043017 ref XP_001928354.1 | PREDICTED: MGC159817 protein isoform 1 [Sus scrofa]                                                                                                                                                                              | 2.079 | 1.832 | 2.726 | 2.978 |
| gi 350591430 ref XP_003483266.1 | PREDICTED: protein SEC13 homolog [Sus scrofa]                                                                                                                                                                                    | 0.852 | 0.702 | 0.715 | 0.613 |
| gi 311270318 ref XP_001925732.2 | PREDICTED: zinc transporter ZIP14 [Sus scrofa]                                                                                                                                                                                   | 1.034 | 0.639 | 0.68  | 0.687 |
| gi 311271598 ref XP_001925392.2 | PREDICTED: bifunctional 3~-phosphoadenosine 5~-phosphosulfate synthase 2-like [Sus scrofa]                                                                                                                                       | 1.47  | 1.492 | 1.161 | 2.034 |
| gi 47522660 ref NP_999079.1     | fatty-acid amide hydrolase 1 [Sus scrofa] >gi 21542039 sp Q9TUI8.1 FAAH1_PIG RecName:                                                                                                                                            | 1.107 | 0.598 | 1.183 | 0.743 |

|                                     |                                                                                                                                                                                                                                                                                    |       |       |       |       |
|-------------------------------------|------------------------------------------------------------------------------------------------------------------------------------------------------------------------------------------------------------------------------------------------------------------------------------|-------|-------|-------|-------|
|                                     | Full=Fatty-acid amide hydrolase 1;<br>AltName: Full=Anandamide<br>amidohydrolase 1; AltName:<br>Full=Oleamide hydrolase<br>1 >gi 6451573 dbj BAA86917.1  fatty<br>acid amide hydro                                                                                                 |       |       |       |       |
| gi 350581741 ref XP_003124<br>660.3 | PREDICTED: phosphomannomutase<br>2-like, partial [Sus scrofa]                                                                                                                                                                                                                      | 1.863 | 1.052 | 1.59  | 1.141 |
| gi 311267482 ref XP_003131<br>586.1 | PREDICTED: chromobox protein<br>homolog 1-like [Sus scrofa]                                                                                                                                                                                                                        | ---   | ---   | ---   | ---   |
| gi 130759 sp P23687.1 PPCE<br>_PIG  | RecName: Full=Prolyl<br>endopeptidase; Short=PE; AltName:<br>Full=Post-proline cleaving<br>enzyme >gi 51592147 ref NP_001004<br>050.1  prolyl endopeptidase [Sus<br>scrofa] >gi 387766256 pdb 4AN1 A<br>Chain A, Prolyl Oligopeptidase From<br>Porcine Brain With A Covalently     | 2.184 | 0.997 | 1.054 | 1.385 |
| gi 5107662 pdb 1QFM A               | Chain A, Prolyl Oligopeptidase From<br>Porcine Muscle                                                                                                                                                                                                                              |       |       |       |       |
| gi 50514023 pdb 1VZ3 A              | Chain A, Prolyl Oligopeptidase From<br>Porcine Brain, T597c Mutant                                                                                                                                                                                                                 |       |       |       |       |
| gi 157879457 pdb 1O6F A             | Chain A, Prolyl Oligopeptidase From<br>Porcine Brain, D641a Mutant With<br>Bound Peptide Ligand Suc-Gly-Pro                                                                                                                                                                        |       |       |       |       |
| gi 334878488 pdb 1H2Z A             | Chain A, Prolyl Oligopeptidase From<br>Porcine Brain, S554a Mutant With<br>Bound Peptide Ligand<br>Suc-Gly-Pro >gi 13096640 pdb 1E8M<br> A Chain A, Prolyl Oligopeptidase<br>From Porcine Brain, Mutant,<br>Complexed With<br>Inhibitor >gi 37928243 pdb 1UOQ A<br>Chain A, Prolyl |       |       |       |       |
| gi 157879458 pdb 1O6G A             | Chain A, Prolyl Oligopeptidase From<br>Porcine Brain, D641n Mutant With<br>Bound Peptide Ligand Suc-Gly-Pro                                                                                                                                                                        |       |       |       |       |
| gi 10835490 pdb 1E5T A              | Chain A, Prolyl Oligopeptidase From<br>Porcine Brain, Mutant                                                                                                                                                                                                                       |       |       |       |       |
| gi 27065054 pdb 1H2X A              | Chain A, Prolyl Oligopeptidase From<br>Porcine Brain, Y473f<br>Mutant >gi 27065055 pdb 1H2Y A<br>Chain A, Prolyl Oligopeptidase From                                                                                                                                               |       |       |       |       |

|                                 |                                                                                                                                                                          |       |       |       |       |
|---------------------------------|--------------------------------------------------------------------------------------------------------------------------------------------------------------------------|-------|-------|-------|-------|
|                                 | Porcine Brain, Y473f Mutant With Covalently Bound Inhibitor Z-Pro-Prolinal                                                                                               |       |       |       |       |
| gi 50514022 pdb 1VZ2 A          | Chain A, Prolyl Oligopeptidase From Porcine Brain, Y73cV427CC255T Mutant                                                                                                 |       |       |       |       |
| gi 350584879 ref XP_003126924.3 | PREDICTED: alanyl-tRNA synthetase, cytoplasmic [Sus scrofa]                                                                                                              | 1.61  | 0.915 | 1.097 | 1.114 |
| gi 56711362 ref NP_001008689.1  | GTP-binding protein SAR1b [Sus scrofa] >gi 75061519 sp Q5PYH3.1 SAR1B_PIG RecName: Full=GTP-binding protein SAR1b >gi 55977172 gb AAV68380.1  Sar1b protein [Sus scrofa] | 0.806 | 0.515 | 0.613 | 0.785 |
| gi 62948008 gb AAV23007.1       | GTP-binding protein SAR1b [Sus scrofa]                                                                                                                                   |       |       |       |       |
| gi 122058965 gb ABM66369.1      | Sara2 protein [Sus scrofa]                                                                                                                                               |       |       |       |       |
| gi 350581244 ref XP_003354387.2 | PREDICTED: transcription elongation regulator 1-like [Sus scrofa]                                                                                                        | 1.157 | 0.827 | 1.12  | 0.839 |
| gi 311256485 ref XP_003126672.1 | PREDICTED: protein SCAF11 [Sus scrofa]                                                                                                                                   | 0.564 | 0.884 | 0.534 | 0.89  |
| gi 335301749 ref XP_001925115.3 | PREDICTED: inorganic pyrophosphatase [Sus scrofa]                                                                                                                        | 0.845 | 1.353 | 0.98  | 1.4   |
| gi 311257919 ref XP_003127356.1 | PREDICTED: aldehyde dehydrogenase family 16 member A1-like isoform 1 [Sus scrofa]                                                                                        | ---   | ---   | ---   | ---   |
| gi 311257921 ref XP_003127357.1 | PREDICTED: aldehyde dehydrogenase family 16 member A1-like isoform 2 [Sus scrofa]                                                                                        |       |       |       |       |
| gi 350590070 ref XP_003131163.3 | PREDICTED: paraspeckle component 1 [Sus scrofa]                                                                                                                          | 1.256 | 0.892 | 0.844 | 1.179 |
| gi 343791007 ref NP_001230549.1 | dynein, cytoplasmic 1, light intermediate chain 2 [Sus scrofa]                                                                                                           | 0.937 | 0.602 | 0.787 | 0.595 |
| gi 194044484 ref XP_001929185.1 | PREDICTED: eukaryotic translation initiation factor 2 subunit 2 [Sus scrofa]                                                                                             | 0.878 | 0.871 | 0.883 | 0.824 |
| gi 350583407 ref XP_003481511.1 | PREDICTED: cathepsin S [Sus scrofa]                                                                                                                                      | 0.807 | 3.109 | 2.841 | 1.171 |
| gi 298104126 ref NP_001177126.1 | NADH dehydrogenase [ubiquinone] 1 alpha subcomplex subunit 8 [Sus                                                                                                        | 0.475 | 0.386 | 0.242 | 0.436 |



|                                 |                                                                                                                                                                                                                                                           |       |       |       |       |
|---------------------------------|-----------------------------------------------------------------------------------------------------------------------------------------------------------------------------------------------------------------------------------------------------------|-------|-------|-------|-------|
|                                 | scrofa]                                                                                                                                                                                                                                                   |       |       |       |       |
| gi 350582355 ref XP_003354851.2 | PREDICTED: exportin-1 [Sus scrofa]                                                                                                                                                                                                                        | 2.597 | 2.292 | 1.444 | 1.821 |
| gi 148237564 ref NP_001090977.1 | adenylosuccinate synthetase isozyme 2 [Sus scrofa] >gi 189031715 sp A4Z6H1.1 PURA2_PIG RecName: Full=Adenylosuccinate synthetase isozyme 2; Short=AMPSase 2; Short=AdSS 2; AltName: Full=Adenylosuccinate synthetase, acidic isozyme; AltName: Full=Adeny | 2.151 | 1.756 | 2.876 | 1.842 |
| gi 147225159 emb CAN13336.1     | valyl-tRNA synthetase 2 [Sus scrofa]                                                                                                                                                                                                                      | 0.936 | 0.861 | 1.053 | 1.209 |
| gi 305855130 ref NP_001182307.1 | valyl-tRNA synthetase [Sus scrofa] >gi 162138236 gb ABX82822.1  valyl-tRNA synthetase [Sus scrofa]                                                                                                                                                        |       |       |       |       |
| gi 347300500 ref NP_001231502.1 | pre-mRNA-processing factor 40 homolog A [Sus scrofa]                                                                                                                                                                                                      | 0.486 | 0.417 | 0.497 | 0.543 |
| gi 350592272 ref XP_003483433.1 | PREDICTED: LOW QUALITY PROTEIN: PDZ and LIM domain protein 2-like [Sus scrofa]                                                                                                                                                                            | 0.472 | 0.971 | 1.074 | 0.77  |
| gi 343887450 ref NP_001230627.1 | acireductone dioxygenase 1 [Sus scrofa]                                                                                                                                                                                                                   | ---   | ---   | ---   | ---   |
| gi 335310208 ref XP_003361930.1 | PREDICTED: NADH dehydrogenase [ubiquinone] 1 beta subcomplex subunit 4-like [Sus scrofa]                                                                                                                                                                  | 1.201 | 0.436 | 0.449 | 0.822 |
| gi 297307137 ref NP_001171999.1 | ran-specific GTPase-activating protein [Sus scrofa]                                                                                                                                                                                                       | 1.286 | 1.053 | 1.001 | 1.898 |
| gi 237681312 ref NP_001153744.1 | protein S100-A12 [Sus scrofa] >gi 126302600 sp P80310.2 S10AC_PIG RecName: Full=Protein S100-A12; AltName: Full=Calgranulin-C; Short=CAGC; AltName: Full=Extracellular newly identified RAGE-binding protein; Short=EN-RAGE; AltName: Full=S100 calcium-b | 0.787 | 1.875 | 1.494 | 2.476 |
| gi 311275455 ref XP_003134746.1 | PREDICTED: V-type proton ATPase subunit F-like [Sus scrofa]                                                                                                                                                                                               | 1.032 | 1.05  | 1.458 | 1.027 |
| gi 270047494 ref NP_001161      | fructose-1,6-bisphosphatase isozyme                                                                                                                                                                                                                       | 1.007 | 0.651 | 0.666 | 0.64  |

|                                 |                                                                                                                                                                                                                                                            |       |       |       |       |
|---------------------------------|------------------------------------------------------------------------------------------------------------------------------------------------------------------------------------------------------------------------------------------------------------|-------|-------|-------|-------|
| 104.2                           | 2 [Sus scrofa]                                                                                                                                                                                                                                             |       |       |       |       |
| gi 335300686 ref XP_003358992.1 | PREDICTED: carbonyl reductase [NADPH] 1-like [Sus scrofa]                                                                                                                                                                                                  | 3.339 | 1.314 | 1.332 | 3.405 |
| gi 350588305 ref XP_003482618.1 | PREDICTED: methylosome subunit pICln-like [Sus scrofa]                                                                                                                                                                                                     | ---   | ---   | ---   | ---   |
| gi 311245238 ref XP_003121750.1 | PREDICTED: lisH domain and HEAT repeat-containing protein KIAA1468-like [Sus scrofa]                                                                                                                                                                       | ---   | ---   | ---   | ---   |
| gi 219522002 ref NP_001137188.1 | dual specificity mitogen-activated protein kinase kinase 1 [Sus scrofa] >gi 217314899 gb ACK36984.1  mitogen-activated protein kinase kinase 1 [Sus scrofa]                                                                                                | ---   | ---   | ---   | ---   |
| gi 350580571 ref XP_003480850.1 | PREDICTED: dual specificity mitogen-activated protein kinase kinase 2-like [Sus scrofa]                                                                                                                                                                    |       |       |       |       |
| gi 347300370 ref NP_001231479.1 | mitogen-activated protein kinase kinase 2 [Sus scrofa]                                                                                                                                                                                                     |       |       |       |       |
| gi 350579773 ref XP_001925384.4 | PREDICTED: U2 small nuclear ribonucleoprotein A~ [Sus scrofa]                                                                                                                                                                                              | 0.703 | 0.733 | 0.655 | 0.683 |
| gi 178056212 ref NP_001116678.1 | tubulin polymerization-promoting protein [Sus scrofa] >gi 170178280 gb ACB10579.1  tubulin polymerization promoting protein p25 alpha [Sus scrofa]                                                                                                         | ---   | ---   | ---   | ---   |
| gi 350584885 ref XP_003126937.3 | PREDICTED: splicing factor 3B subunit 3-like [Sus scrofa]                                                                                                                                                                                                  | 1.029 | 0.697 | 0.616 | 1.068 |
| gi 62082662 gb AAX62160.1       | glycogen synthase 1 [Sus scrofa]                                                                                                                                                                                                                           | ---   | ---   | ---   | ---   |
| gi 306029976 gb ADM83431.1      | glycogen synthase 1 [Sus scrofa] >gi 306782595 ref NP_001182437.1  glycogen [starch] synthase, muscle [Sus scrofa]                                                                                                                                         |       |       |       |       |
| gi 178056623 ref NP_001116685.1 | vesicle-associated membrane protein-associated protein B [Sus scrofa] >gi 160210890 sp A5GFS8.1  VAPB_PIG RecName: Full=Vesicle-associated membrane protein-associated protein B; Short=VAMP-B; Short=VAMP-associated protein B; Short=VAP-B >gi 147223393 | 0.473 | 0.849 | 0.623 | 0.782 |
| gi 132566481 gb ABO34136.       | bactericidal permeability increasing                                                                                                                                                                                                                       | 1.007 | 0.321 | 0.341 | 0.863 |

|                                    |                                                                                                                                                                                                                        |       |       |       |       |
|------------------------------------|------------------------------------------------------------------------------------------------------------------------------------------------------------------------------------------------------------------------|-------|-------|-------|-------|
| 1                                  | protein [Sus scrofa]                                                                                                                                                                                                   |       |       |       |       |
| gi 226533693 ref NP_001152779.1    | bactericidal permeability-increasing protein precursor [Sus scrofa] >gi 225922170 gb ACO37155.1  bactericidal/permeability increasing protein [Sus scrofa]                                                             |       |       |       |       |
| gi 347543763 ref NP_001231548.1    | calmodulin-like 4 [Sus scrofa]                                                                                                                                                                                         | 0.596 | 0.478 | 0.608 | 0.471 |
| gi 240851536 ref NP_001155875.1    | ubiquitin thioesterase OTUB1 [Sus scrofa] >gi 167888450 gb ACA09613.1  OTUB1 [Sus scrofa]                                                                                                                              | 1.916 | 1.458 | 1.235 | 1.685 |
| gi 298231139 ref NP_001177220.1    | pancreatic lipase-related protein 2 precursor [Sus scrofa] >gi 204307484 gb ACI00231.1  pancreatic lipase-related protein 2 [Sus scrofa] >gi 204307482 gb ACI00230.1  pancreatic lipase-related protein 2 [Sus scrofa] | 1.485 | 1.001 | 0.449 | 0.797 |
| gi 350580438 ref XP_003480823.1    | PREDICTED: NADH dehydrogenase [ubiquinone] 1 beta subcomplex subunit 7-like [Sus scrofa]                                                                                                                               | 0.407 | 0.396 | 0.258 | 0.394 |
| gi 335310428 ref XP_003362028.1    | PREDICTED: surfeit locus protein 4-like, partial [Sus scrofa]                                                                                                                                                          | 0.968 | 0.242 | 0.24  | 0.501 |
| gi 311259825 ref XP_001924399.2    | PREDICTED: leucine-rich repeat-containing protein 16A [Sus scrofa]                                                                                                                                                     | 1.062 | 1.41  | 1.161 | 1.191 |
| gi 346986364 ref NP_001231333.1    | serine/threonine-protein phosphatase 6 catalytic subunit [Sus scrofa]                                                                                                                                                  | ---   | ---   | ---   | ---   |
| gi 148887343 sp Q9MYT8.4 ATP5I_PIG | RecName: Full=ATP synthase subunit e, mitochondrial; Short=ATPase subunit e                                                                                                                                            | 0.728 | 0.624 | 0.575 | 0.535 |
| gi 311268019 ref XP_003131834.1    | PREDICTED: carboxypeptidase D [Sus scrofa]                                                                                                                                                                             | 0.829 | 0.626 | 0.85  | 0.993 |
| gi 148230268 ref NP_001090970.1    | galectin-3 [Sus scrofa] >gi 124830340 gb ABN15099.1  lectin galactoside-binding soluble 3 [Sus scrofa]                                                                                                                 | 0.987 | 0.842 | 0.859 | 0.77  |
| gi 157427728 ref NP_001098772.1    | ATP-citrate synthase isoform 2 [Sus scrofa] >gi 380509279 gb AFD64642.1  ATP citrate lyase short isoform [Sus scrofa] >gi 156140098 gb ABU51323                                                                        | 0.96  | 0.574 | 0.853 | 0.991 |

|                                 |                                                                                                                                                                                                                                                           |       |       |       |       |
|---------------------------------|-----------------------------------------------------------------------------------------------------------------------------------------------------------------------------------------------------------------------------------------------------------|-------|-------|-------|-------|
|                                 | .1  ATP citrate lyase [Sus scrofa]                                                                                                                                                                                                                        |       |       |       |       |
| gi 381140346 ref NP_001244205.1 | ATP-citrate synthase isoform 1 [Sus scrofa] >gi 380509277 gb AFD64641.1  ATP citrate lyase long isoform [Sus scrofa]                                                                                                                                      |       |       |       |       |
| gi 341942463 gb AEL12455.1      | ATP citrate lyase [Sus scrofa]                                                                                                                                                                                                                            |       |       |       |       |
| gi 335289328 ref XP_003355850.1 | PREDICTED: ubiquinone biosynthesis protein COQ9, mitochondrial-like [Sus scrofa]                                                                                                                                                                          | 0.95  | 0.625 | 0.737 | 0.889 |
| gi 335307327 ref XP_003127745.2 | PREDICTED: heterogeneous nuclear ribonucleoprotein R [Sus scrofa]                                                                                                                                                                                         | ---   | ---   | ---   | ---   |
| gi 343488538 ref NP_001230424.1 | cytoplasmic dynein 1 intermediate chain 2 [Sus scrofa]                                                                                                                                                                                                    | 0.686 | 1.581 | 1.663 | 1.087 |
| gi 343790888 ref NP_001230502.1 | uncharacterized protein LOC100627352 [Sus scrofa]                                                                                                                                                                                                         | 0.852 | 0.333 | 0.465 | 0.797 |
| gi 311265230 ref XP_003130552.1 | PREDICTED: 3~(2~),5~-bisphosphate nucleotidase 1-like isoform 2 [Sus scrofa]                                                                                                                                                                              | 1.739 | 1.093 | 0.851 | 2.146 |
| gi 311265232 ref XP_003130551.1 | PREDICTED: 3~(2~),5~-bisphosphate nucleotidase 1-like isoform 1 [Sus scrofa]                                                                                                                                                                              |       |       |       |       |
| gi 350597093 ref XP_003362096.2 | PREDICTED: pyruvate kinase isozymes R/L-like [Sus scrofa]                                                                                                                                                                                                 | ---   | ---   | ---   | ---   |
| gi 311269055 ref XP_003132321.1 | PREDICTED: monoacylglycerol lipase ABHD6 [Sus scrofa]                                                                                                                                                                                                     | 0.846 | 0.276 | 0.256 | 0.585 |
| gi 346421372 ref NP_001231060.1 | ferritin, light polypeptide [Sus scrofa]                                                                                                                                                                                                                  | 0.84  | 1.455 | 2.659 | 1.513 |
| gi 311261863 ref XP_003128900.1 | PREDICTED: cell growth-regulating nucleolar protein [Sus scrofa]                                                                                                                                                                                          | 1.193 | 1.164 | 1.529 | 1.079 |
| gi 346644844 ref NP_001231177.1 | phosphotriesterase-related protein [Sus scrofa]                                                                                                                                                                                                           | 1.138 | 2.16  | 2.467 | 1.396 |
| gi 7288152 dbj BAA92850.1       | esterase D [Sus scrofa]                                                                                                                                                                                                                                   | 3.122 | 1.562 | 2.008 | 3.194 |
| gi 47522936 ref NP_999225.1     | S-formylglutathione hydrolase [Sus scrofa] >gi 62900112 sp Q9GJT2.1 E STD_PIG RecName: Full=S-formylglutathione hydrolase; Short=FGH; AltName: Full=Esterase D >gi 10443892 gb AAG17630.1 AF254785_1 esterase D [Sus scrofa] >gi 9857260 dbj BAB11922.1 e |       |       |       |       |

|                                     |                                                                                                                                                                                                                                                           |       |       |       |       |
|-------------------------------------|-----------------------------------------------------------------------------------------------------------------------------------------------------------------------------------------------------------------------------------------------------------|-------|-------|-------|-------|
| gi 348605151 ref NP_001231720.1     | hydroxysteroid (17-beta) dehydrogenase 3 [Sus scrofa]                                                                                                                                                                                                     | ---   | ---   | ---   | ---   |
| gi 350589482 ref XP_003357775.2     | PREDICTED: BAG family molecular chaperone regulator 1-like isoform 1 [Sus scrofa]                                                                                                                                                                         |       |       |       |       |
| gi 347300398 ref NP_001231491.1     | core histone macro-H2A.1 isoform 1 [Sus scrofa]                                                                                                                                                                                                           | 1.416 | 0.411 | 0.92  | 1.318 |
| gi 347300400 ref NP_001231492.1     | core histone macro-H2A.1 isoform 2 [Sus scrofa]                                                                                                                                                                                                           |       |       |       |       |
| gi 350588303 ref XP_003129732.3     | PREDICTED: serine/threonine-protein kinase PAK 1-like [Sus scrofa]                                                                                                                                                                                        | 1.086 | 0.799 | 0.761 | 0.84  |
| gi 45268967 gb AAS55896.1           | 40S ribosomal protein S28, partial [Sus scrofa]                                                                                                                                                                                                           | 0.812 | 1.156 | 1.082 | 1.173 |
| gi 48597082 ref NP_001001587.1      | 40S ribosomal protein S28 [Sus scrofa] >gi 51316555 sp Q6QAT1.2 R S28_PIG RecName: Full=40S ribosomal protein S28                                                                                                                                         |       |       |       |       |
| gi 13878316 sp P79273.1 AC ADS_PIG  | RecName: Full=Short-chain specific acyl-CoA dehydrogenase, mitochondrial; Short=SCAD; AltName: Full=Butyryl-CoA dehydrogenase; Flags: Precursor >gi 47522686 ref NP_999063.1  short-chain specific acyl-CoA dehydrogenase, mitochondrial precursor [Sus s | 1.815 | 0.506 | 0.361 | 0.938 |
| gi 311252326 ref XP_003125038.1     | PREDICTED: mannosyl-oligosaccharide glucosidase [Sus scrofa]                                                                                                                                                                                              | ---   | ---   | ---   | ---   |
| gi 166796059 ref NP_001107755.1     | aminoacyl tRNA synthase complex-interacting multifunctional protein 1 [Sus scrofa] >gi 164598078 gb ABY61326.1  small inducible cytokine subfamily E member 1 [Sus scrofa]                                                                                | 1.039 | 0.894 | 0.937 | 1.423 |
| gi 297747346 ref NP_001177097.1     | S100 calcium binding protein A14 [Sus scrofa]                                                                                                                                                                                                             | 0.868 | 1.211 | 1.289 | 0.925 |
| gi 346716331 ref NP_001231183.1     | ras-related protein Rab-5C [Sus scrofa]                                                                                                                                                                                                                   | 0.994 | 1.048 | 0.475 | 0.811 |
| gi 122142619 sp Q19S50.1 S TAT3_PIG | RecName: Full=Signal transducer and activator of transcription 3 >gi 113205774 ref NP_001038045.                                                                                                                                                          | 0.697 | 0.816 | 0.729 | 0.586 |

|                                 |                                                                                                                                                              |       |       |       |       |
|---------------------------------|--------------------------------------------------------------------------------------------------------------------------------------------------------------|-------|-------|-------|-------|
|                                 | 1  signal transducer and activator of transcription 3 [Sus scrofa] >gi 315273320 gb ADU03227.1  signal transducer and activator of transcription 3 isoform 1 |       |       |       |       |
| gi 315273324 gb ADU03228.1      | signal transducer and activator of transcription 3 isoform 2 [Sus scrofa]                                                                                    |       |       |       |       |
| gi 335284676 ref XP_003124691.2 | PREDICTED: coronin-7-like [Sus scrofa]                                                                                                                       | 2.172 | 1.572 | 1.581 | 1.798 |
| gi 350582437 ref XP_003481270.1 | PREDICTED: multiple coagulation factor deficiency protein 2-like [Sus scrofa]                                                                                | ---   | ---   | ---   | ---   |
| gi 56788496 gb AAW29969.1       | unknown [Sus scrofa] >gi 56792880 gb AAW30632.1  unknown [Sus scrofa]                                                                                        | 0.647 | 1.212 | 0.768 | 1.437 |
| gi 311268139 ref XP_003131895.1 | PREDICTED: sedoheptulokinase [Sus scrofa]                                                                                                                    | ---   | ---   | ---   | ---   |
| gi 335310769 ref XP_003362184.1 | PREDICTED: THO complex subunit 4-like, partial [Sus scrofa]                                                                                                  | 0.639 | 0.688 | 0.742 | 0.587 |
| gi 350589921 ref XP_003482951.1 | PREDICTED: olfactomedin-4-like [Sus scrofa]                                                                                                                  |       |       |       |       |
| gi 335284655 ref XP_003124675.2 | PREDICTED: putative oxidoreductase GLYR1 isoform 1 [Sus scrofa]                                                                                              |       |       |       |       |
| gi 335284657 ref XP_003354668.1 | PREDICTED: putative oxidoreductase GLYR1 isoform 2 [Sus scrofa]                                                                                              |       |       |       |       |
| gi 335284659 ref XP_003354669.1 | PREDICTED: putative oxidoreductase GLYR1 isoform 3 [Sus scrofa]                                                                                              |       |       |       |       |
| gi 319738636 ref NP_001188360.1 | selenoprotein O [Sus scrofa]                                                                                                                                 | ---   | ---   | ---   | ---   |
| gi 311256987 ref XP_003126905.1 | PREDICTED: telomeric repeat-binding factor 2-interacting protein 1 [Sus scrofa]                                                                              | 1.368 | 2.792 | 2.63  | 1.525 |
| gi 350591252 ref XP_003132269.3 | PREDICTED: RNA-binding protein 5 [Sus scrofa]                                                                                                                | ---   | ---   | ---   | ---   |
| gi 335281184 ref XP_003353752.1 | PREDICTED: WD repeat-containing protein 5 [Sus scrofa]                                                                                                       | 0.726 | 1.433 | 1.209 | 1.175 |
| gi 345199288 ref NP_001230831.1 | protein phosphatase 1, regulatory (inhibitor) subunit 7 [Sus scrofa]                                                                                         | 1.888 | 1.653 | 0.854 | 2.001 |
| gi 311276634 ref XP_003135      | PREDICTED: mitochondrial import                                                                                                                              | 0.885 | 1.602 | 1.803 | 0.802 |

|                                 |                                                                                                                                       |       |       |       |       |
|---------------------------------|---------------------------------------------------------------------------------------------------------------------------------------|-------|-------|-------|-------|
| 287.1                           | inner membrane translocase subunit Tim8 A-like [Sus scrofa]                                                                           |       |       |       |       |
| gi 350584903 ref XP_003126945.3 | PREDICTED: AP-1 complex subunit gamma-1 isoform 1 [Sus scrofa]                                                                        | 1.115 | 0.685 | 0.787 | 1.059 |
| gi 350584905 ref XP_003481845.1 | PREDICTED: AP-1 complex subunit gamma-1 isoform 2 [Sus scrofa]                                                                        |       |       |       |       |
| gi 178056464 ref NP_001116693.1 | beta-hexosaminidase subunit alpha precursor [Sus scrofa] >gi 169117926 gb ACA43012.1  hexosaminidase A alpha polypeptide [Sus scrofa] | 0.957 | 0.757 | 0.809 | 0.847 |
| gi 385648284 ref NP_001245315.1 | topoisomerase (DNA) II beta 180kDa [Sus scrofa]                                                                                       | 0.719 | 0.554 | 0.635 | 0.674 |
| gi 311260926 ref XP_001924849.2 | PREDICTED: sec1 family domain-containing protein 1 [Sus scrofa]                                                                       | 1.944 | 0.808 | 1.404 | 1.612 |
| gi 311248720 ref XP_003123296.1 | PREDICTED: eukaryotic translation initiation factor 3 subunit G-like [Sus scrofa]                                                     | 0.707 | 1.429 | 1.503 | 1.273 |
| gi 335285938 ref XP_003131986.2 | PREDICTED: Y-box-binding protein 2-like [Sus scrofa]                                                                                  | ---   | ---   | ---   | ---   |
| gi 350590843 ref XP_003483149.1 | PREDICTED: Y-box-binding protein 2-like [Sus scrofa]                                                                                  |       |       |       |       |
| gi 57528035 ref NP_001009582.1  | stathmin [Sus scrofa] >gi 75043336 sp Q6DUB7.3 STMN1_PIG RecName: Full=Stathmin >gi 49615355 gb AAT66936.1  stathmin-1 [Sus scrofa]   | 0.699 | 1.231 | 1.255 | 1.081 |
| gi 350578790 ref XP_003121632.3 | PREDICTED: calcium-binding protein p22-like [Sus scrofa]                                                                              | 0.862 | 0.931 | 1.199 | 0.729 |
| gi 350596649 ref XP_003361456.2 | PREDICTED: calcium-binding protein p22-like [Sus scrofa]                                                                              |       |       |       |       |
| gi 350578792 ref XP_003480452.1 | PREDICTED: calcium-binding protein p22-like isoform 1 [Sus scrofa]                                                                    |       |       |       |       |
| gi 4432942 dbj BAA21081.1       | ribosomal protein S4 [Sus scrofa]                                                                                                     | 1.354 | 1.001 | 0.784 | 1.355 |
| gi 324021713 ref NP_001191212.1 | ribosomal protein S4 [Sus scrofa]                                                                                                     |       |       |       |       |
| gi 350590315 ref XP_003483030.1 | PREDICTED: eukaryotic translation initiation factor 1-like [Sus scrofa]                                                               | 0.736 | 1.146 | 1.26  | 1.239 |
| gi 194043083 ref XP_001928729.1 | PREDICTED: malectin-like [Sus scrofa]                                                                                                 | 0.792 | 0.388 | 0.53  | 0.878 |

|                                  |                                                                                                                                                                                                                                                           |       |       |       |       |
|----------------------------------|-----------------------------------------------------------------------------------------------------------------------------------------------------------------------------------------------------------------------------------------------------------|-------|-------|-------|-------|
| gi 335309994 ref XP_003130977.2  | PREDICTED: hypothetical protein LOC100522509, partial [Sus scrofa]                                                                                                                                                                                        | ---   | ---   | ---   | ---   |
| gi 89216 pir PT0220              | Ig lambda chain V-C region PLC3 - pig (fragment)                                                                                                                                                                                                          | 0.534 | 0.84  | 0.664 | 0.541 |
| gi 164511 gb AAA03572.1          | immunoglobulin lambda-chain, partial [Sus scrofa]                                                                                                                                                                                                         |       |       |       |       |
| gi 343183368 ref NP_001230248.1  | immunoglobulin lambda-like polypeptide 5 precursor [Sus scrofa]                                                                                                                                                                                           |       |       |       |       |
| gi 125947 sp P01846.1 LAC_PIG    | RecName: Full=Ig lambda chain C region                                                                                                                                                                                                                    |       |       |       |       |
| gi 350592642 ref XP_003483508.1  | PREDICTED: T-cell receptor beta chain T17T-22-like [Sus scrofa]                                                                                                                                                                                           |       |       |       |       |
| gi 311271023 ref XP_003133034.1  | PREDICTED: immunoglobulin lambda-like polypeptide 5-like [Sus scrofa]                                                                                                                                                                                     |       |       |       |       |
| gi 350584919 ref XP_003481848.1  | PREDICTED: IST1 homolog [Sus scrofa]                                                                                                                                                                                                                      | ---   | ---   | ---   | ---   |
| gi 335290688 ref XP_003356248.1  | PREDICTED: hydroxymethylglutaryl-CoA lyase, mitochondrial-like isoform 1 [Sus scrofa]                                                                                                                                                                     | 0.92  | 1.174 | 0.679 | 0.763 |
| gi 335310870 ref XP_003362231.1  | PREDICTED: tumor protein D54-like, partial [Sus scrofa]                                                                                                                                                                                                   | ---   | ---   | ---   | ---   |
| gi 19883961 sp P35750.3 CAN1_PIG | RecName: Full=Calpain-1 catalytic subunit; AltName: Full=Calcium-activated neutral proteinase 1; Short=CANP 1; AltName: Full=Calpain mu-type; AltName: Full=Calpain-1 large subunit; AltName: Full=Micromolar-calpain; Short=muCANP >gi 8132993 gb AAF734 | 1.292 | 1.074 | 1.2   | 1.214 |
| gi 47522772 ref NP_999137.1      | calpain-1 catalytic subunit [Sus scrofa] >gi 8132991 gb AAF73443.1  AF263609_1 micromolar calcium-activated neutral protease 1 isoform B [Sus scrofa]                                                                                                     |       |       |       |       |
| gi 335282905 ref XP_003354187.1  | PREDICTED: 60S ribosomal protein L18a-like isoform 4 [Sus scrofa] >gi 335282901 ref XP_003354185.1  PREDICTED: 60S ribosomal protein L18a-like isoform 2 [Sus                                                                                             | 0.673 | 0.483 | 0.4   | 0.83  |



|                                 |                                                                                                                                                                                                                                                            |       |       |       |       |
|---------------------------------|------------------------------------------------------------------------------------------------------------------------------------------------------------------------------------------------------------------------------------------------------------|-------|-------|-------|-------|
|                                 | scrofa] >gi 335282903 ref XP_003354186.1  PREDICTED: 60S ribosomal protein L18a-like isofor                                                                                                                                                                |       |       |       |       |
| gi 2275401 gb AAB63894.1        | ovarian sterol carrier protein 2, partial [Sus scrofa]                                                                                                                                                                                                     | 1.491 | 0.833 | 1.117 | 1.32  |
| gi 350586177 ref XP_003482126.1 | PREDICTED: non-specific lipid-transfer protein-like [Sus scrofa]                                                                                                                                                                                           |       |       |       |       |
| gi 350587510 ref XP_003482430.1 | PREDICTED: pre-mRNA 3~-end-processing factor FIP1-like [Sus scrofa]                                                                                                                                                                                        | 0.645 | 0.841 | 1.135 | 1.033 |
| gi 113205600 ref NP_001038003.1 | guanine nucleotide-binding protein subunit alpha-11 [Sus scrofa] >gi 122142902 sp Q2XSV9.2  GNA11_PIG RecName: Full=Guanine nucleotide-binding protein subunit alpha-11; Short=G alpha-11; Short=G-protein subunit alpha-11 >gi 84688557 gb ABB71823.2  gu | 1.305 | 0.455 | 0.502 | 0.734 |
| gi 146741292 dbj BAF62301.1     | guanine nucleotide-binding protein, alpha-11 [Sus scrofa]                                                                                                                                                                                                  |       |       |       |       |
| gi 350587233 ref XP_003482374.1 | PREDICTED: cytoplasmic dynein 1 heavy chain 1-like [Sus scrofa]                                                                                                                                                                                            | ---   | ---   | ---   | ---   |
| gi 335310309 ref XP_003361972.1 | PREDICTED: 39S ribosomal protein L12, mitochondrial-like, partial [Sus scrofa]                                                                                                                                                                             | ---   | ---   | ---   | ---   |
| gi 121149 sp P20735.1 GGT1_PIG  | RecName: Full=Gamma-glutamyltranspeptidase 1; Short=GGT 1; AltName: Full=Gamma-glutamyltransferase 1; AltName: Full=Glutathione hydrolase 1; AltName: Full=Leukotriene-C4 hydrolase; AltName: CD_antigen=CD224; Contains: RecName: Full=Gamma-glutamyltra  | 0.92  | 0.941 | 1.029 | 0.802 |
| gi 146741348 dbj BAF62329.1     | gamma-glutamyltranspeptidase 1 [Sus scrofa]                                                                                                                                                                                                                |       |       |       |       |
| gi 193788671 ref NP_001123277.1 | carnitine O-palmitoyltransferase 1, liver isoform [Sus scrofa] >gi 14579225 gb AAK69171.1 AF288789_1 carnitine palmitoyltransferase I [Sus scrofa] >gi 222090415 gb ACM42415                                                                               | 1.518 | 0.619 | 1.096 | 0.742 |

|                                   |                                                                                                                                                                                                                                                        |       |       |       |       |
|-----------------------------------|--------------------------------------------------------------------------------------------------------------------------------------------------------------------------------------------------------------------------------------------------------|-------|-------|-------|-------|
|                                   | .1  liver type carnitine palmitoyltransferase I [Sus scrofa]                                                                                                                                                                                           |       |       |       |       |
| gi 312062795 ref NP_001185851.1   | mitogen-activated protein kinase 1 [Sus scrofa] >gi 310789265 gb ADP24686.1  extracellular signal-regulated kinase-2 [Sus scrofa]                                                                                                                      | ---   | ---   | ---   | ---   |
| gi 335310941 ref XP_003362261.1   | PREDICTED: 40S ribosomal protein S2-like [Sus scrofa]                                                                                                                                                                                                  | 0.619 | 0.566 | 0.74  | 0.944 |
| gi 124857 sp P00998.1 ISK1_PIG    | RecName: Full=Pancreatic secretory trypsin inhibitor; AltName: Full=Serine protease inhibitor Kazal-type 1 >gi 230351 pdb 1TGS Chain I, Three-Dimensional Structure Of The Complex Between Pancreatic Secretory Inhibitor (Kazal Type) And Trypsinogen | 0.546 | 1.059 | 0.297 | 0.98  |
| gi 229311 prf 700704A             | inhibitor II, trypsin                                                                                                                                                                                                                                  |       |       |       |       |
| gi 335283733 ref XP_003354394.1   | PREDICTED: pancreatic secretory trypsin inhibitor-like isoform 1 [Sus scrofa]                                                                                                                                                                          |       |       |       |       |
| gi 343432640 ref NP_001230334.1   | 39S ribosomal protein L44, mitochondrial [Sus scrofa]                                                                                                                                                                                                  | 1.053 | 0.959 | 0.789 | 0.981 |
| gi 311252785 ref XP_003125258.1   | PREDICTED: serine/arginine-rich splicing factor 7-like isoform 1 [Sus scrofa]                                                                                                                                                                          | 0.925 | 1.059 | 1.163 | 1.091 |
| gi 350586583 ref XP_003482220.1   | PREDICTED: serine/arginine-rich splicing factor 3-like [Sus scrofa]                                                                                                                                                                                    |       |       |       |       |
| gi 350596827 ref XP_003128414.2   | PREDICTED: serine/arginine-rich splicing factor 3-like [Sus scrofa]                                                                                                                                                                                    |       |       |       |       |
| gi 311252787 ref XP_003125259.1   | PREDICTED: serine/arginine-rich splicing factor 7-like isoform 2 [Sus scrofa]                                                                                                                                                                          |       |       |       |       |
| gi 311264036 ref XP_003129968.1   | PREDICTED: 40S ribosomal protein S25-like isoform 2 [Sus scrofa] >gi 311264034 ref XP_003129967.1  PREDICTED: 40S ribosomal protein S25-like isoform 1 [Sus scrofa]                                                                                    | 0.408 | 0.174 | 0.194 | 0.439 |
| gi 75054309 sp Q8WNQ7.1 GALNS_PIG | RecName: Full=N-acetylgalactosamine-6-sulfatase; AltName: Full=Chondroitinsulfatase;                                                                                                                                                                   | 1.114 | 1.206 | 1.362 | 0.958 |

|                                 |                                                                                                                                                                                                                                 |       |       |       |       |
|---------------------------------|---------------------------------------------------------------------------------------------------------------------------------------------------------------------------------------------------------------------------------|-------|-------|-------|-------|
|                                 | Short=Chondroitinase; AltName: Full=Galactose-6-sulfate sulfatase; AltName: Full=N-acetylgalactosamine-6-sulfate sulfatase; Short=GalNAc6S sulfatase; Flags: Precurs                                                            |       |       |       |       |
| gi 298160993 ref NP_001177169.1 | glycerol-3-phosphate dehydrogenase [NAD+], cytoplasmic [Sus scrofa]                                                                                                                                                             | 0.658 | 0.354 | 0.279 | 0.313 |
| gi 350583346 ref XP_003125776.3 | PREDICTED: ubiquitin associated protein 2-like isoform 3 [Sus scrofa]                                                                                                                                                           | 0.946 | 1.471 | 1.696 | 1.033 |
| gi 350596813 ref XP_003484323.1 | PREDICTED: ubiquitin-associated protein 2-like [Sus scrofa]                                                                                                                                                                     |       |       |       |       |
| gi 347922148 ref NP_001231673.1 | charged multivesicular body protein 5 [Sus scrofa]                                                                                                                                                                              | 0.442 | 0.792 | 1.053 | 0.549 |
| gi 335289683 ref XP_003355956.1 | PREDICTED: LOW QUALITY PROTEIN: mitochondrial import inner membrane translocase subunit TIM50-like [Sus scrofa]                                                                                                                 | 0.891 | 1.032 | 0.715 | 0.748 |
| gi 114326218 ref NP_001041535.1 | hematological and neurological expressed 1-like protein [Sus scrofa] >gi 54114954 tpg DAA01824.1  TPA_inf: HN1-like protein [Sus scrofa]                                                                                        | 0.682 | 1.098 | 0.968 | 1.471 |
| gi 346986315 ref NP_001231313.1 | alpha-soluble NSF attachment protein [Sus scrofa]                                                                                                                                                                               | 1.129 | 0.696 | 0.769 | 0.769 |
| gi 350592026 ref XP_003132761.3 | PREDICTED: TBC1 domain family member 23-like [Sus scrofa]                                                                                                                                                                       | 0.957 | 0.835 | 1.06  | 0.95  |
| gi 311255134 ref XP_003126086.1 | PREDICTED: 2-amino-3-ketobutyrate coenzyme A ligase, mitochondrial-like isoform 1 [Sus scrofa] >gi 311255118 ref XP_003126081.1  PREDICTED: 2-amino-3-ketobutyrate coenzyme A ligase, mitochondrial-like isoform 1 [Sus scrofa] | 0.922 | 0.418 | ---   | 0.493 |
| gi 350589397 ref XP_003357727.2 | PREDICTED: aminopeptidase B-like [Sus scrofa]                                                                                                                                                                                   | 1.773 | 1.562 | 1.107 | 1.839 |
| gi 47716872 gb AAT37622.1       | galectin-1 [Sus scrofa]                                                                                                                                                                                                         | 0.635 | 0.693 | 0.67  | 0.513 |
| gi 311259452 ref XP_003128108.1 | PREDICTED: 40S ribosomal protein S8-like [Sus scrofa]                                                                                                                                                                           | 1.064 | 0.634 | 0.671 | 1.375 |
| gi 189043876 sp A1XQU9.1        | RecName: Full=40S ribosomal                                                                                                                                                                                                     | 0.872 | 0.66  | 0.567 | 0.93  |

|                                 |                                                                                                                                                                                                       |       |       |       |       |
|---------------------------------|-------------------------------------------------------------------------------------------------------------------------------------------------------------------------------------------------------|-------|-------|-------|-------|
| RS20_PIG                        | protein<br>S20 >gi 194018718 ref NP_001123426.1  40S ribosomal protein S20 [Sus scrofa] >gi 117661119 gb ABK55655.1  RPS20 [Sus scrofa]                                                               |       |       |       |       |
| gi 113205666 ref NP_001038019.1 | NADH dehydrogenase 1 beta subcomplex 6 [Sus scrofa] >gi 87047638 gb ABD18452.1  NADH dehydrogenase 1 beta subcomplex 6 [Sus scrofa]                                                                   | ---   | ---   | ---   | ---   |
| gi 311270922 ref XP_003133013.1 | PREDICTED: up-regulated during skeletal muscle growth protein 5-like [Sus scrofa] >gi 311271791 ref XP_003133221.1  PREDICTED: up-regulated during skeletal muscle growth protein 5-like [Sus scrofa] | ---   | ---   | ---   | ---   |
| gi 256838109 ref NP_001157984.1 | phosphate carrier protein, mitochondrial [Sus scrofa] >gi 255964672 gb ACU44653.1  solute carrier family 25 member 3 [Sus scrofa]                                                                     | 0.704 | 0.387 | 0.381 | 0.659 |
| gi 343790856 ref NP_001230567.1 | glutathione transferase zeta 1 [Sus scrofa]                                                                                                                                                           | 1.644 | 0.741 | 0.595 | 1.333 |
| gi 195972993 ref NP_001124446.1 | stromal interaction molecule 1 precursor [Sus scrofa] >gi 157929328 gb ABW03922.1  stromal interaction molecule 1 [Sus scrofa]                                                                        |       |       |       |       |
| gi 178056753 ref NP_001116644.1 | glycogen phosphorylase, liver form [Sus scrofa] >gi 167834153 gb ACA02827.1  glycogen storage disease type VI-related protein [Sus scrofa]                                                            | ---   | ---   | ---   | ---   |
| gi 350589278 ref XP_003130571.3 | PREDICTED: melanoma inhibitory activity protein 3-like, partial [Sus scrofa]                                                                                                                          | 0.752 | 1.073 | 0.757 | 0.72  |
| gi 335287593 ref XP_003355390.1 | PREDICTED: ras-related C3 botulinum toxin substrate 2-like [Sus scrofa]                                                                                                                               | ---   | ---   | ---   | ---   |
| gi 342672022 ref NP_001230144.1 | exportin-2 [Sus scrofa]                                                                                                                                                                               | 1.359 | 0.529 | 0.497 | 1.03  |
| gi 311274576 ref XP_003134      | PREDICTED: small nuclear                                                                                                                                                                              | ---   | ---   | ---   | ---   |

|                                  |                                                                                                                                                                                                                                                           |       |       |       |       |
|----------------------------------|-----------------------------------------------------------------------------------------------------------------------------------------------------------------------------------------------------------------------------------------------------------|-------|-------|-------|-------|
| 384.1                            | ribonucleoprotein-associated protein B~like [Sus scrofa]                                                                                                                                                                                                  |       |       |       |       |
| gi 343887452 ref NP_001230628.1  | small nuclear ribonucleoprotein polypeptide N [Sus scrofa]                                                                                                                                                                                                |       |       |       |       |
| gi 381352839 gb AFG25597.1       | SNRPN [Sus scrofa]                                                                                                                                                                                                                                        |       |       |       |       |
| gi 335292262 ref XP_001927373.3  | PREDICTED: isocitrate dehydrogenase [NAD] subunit alpha, mitochondrial [Sus scrofa]                                                                                                                                                                       | 0.941 | 0.61  | 1.02  | 0.702 |
| gi 335281115 ref XP_001926630.3  | PREDICTED: nuclear pore complex protein Nup214 [Sus scrofa]                                                                                                                                                                                               | 0.588 | 1.43  | 0.797 | 0.893 |
| gi 350587460 ref XP_003128981.3  | PREDICTED: sister chromatid cohesion protein PDS5 homolog A-like [Sus scrofa]                                                                                                                                                                             | ---   | ---   | ---   | ---   |
| gi 219521990 ref NP_001137182.1  | granzyme B precursor [Sus scrofa] >gi 216408333 gb ACJ72857.1  granzyme B [Sus scrofa]                                                                                                                                                                    | 1.167 | 3.528 | 4.173 | 3.057 |
| gi 335299970 ref XP_003358743.1  | PREDICTED: DCN1-like protein 1-like [Sus scrofa]                                                                                                                                                                                                          | ---   | ---   | ---   | ---   |
| gi 194040450 ref XP_001927992.1  | PREDICTED: lactoylglutathione lyase isoform 1 [Sus scrofa]                                                                                                                                                                                                | 1.245 | 1.591 | 3.199 | 2.25  |
| gi 350586543 ref XP_003482212.1  | PREDICTED: glutamate--cysteine ligase catalytic subunit isoform 2 [Sus scrofa]                                                                                                                                                                            | 2.588 | 1.351 | 1.762 | 2.034 |
| gi 51702802 sp P62901.1 RL31_PIG | RecName: Full=60S ribosomal protein L31 >gi 350582083 ref XP_003481192.1  PREDICTED: 60S ribosomal protein L31-like isoform 4 [Sus scrofa] >gi 350582079 ref XP_003481190.1  PREDICTED: 60S ribosomal protein L31-like isoform 2 [Sus scrofa] >gi 3505820 | 0.573 | 0.991 | 0.69  | 0.994 |
| gi 349585075 ref NP_001231802.1  | small acidic protein [Sus scrofa]                                                                                                                                                                                                                         | ---   | ---   | ---   | ---   |
| gi 47524464 gb AAT34965.1        | 2~-5~ oligoadenylate synthetase 1 [Sus scrofa]                                                                                                                                                                                                            | ---   | ---   | ---   | ---   |
| gi 740987 prf 2006263A           | Arg Gly amidinotransferase                                                                                                                                                                                                                                | 0.768 | 0.399 | 0.54  | 0.432 |
| gi 190360601 ref NP_001121914.1  | glycine amidinotransferase, mitochondrial [Sus scrofa] >gi 308153447 sp P50441.2 GATM_PIG RecName: Full=Glycine                                                                                                                                           |       |       |       |       |

|                                      |                                                                                                                                                                                                                                                                                   |       |       |       |       |
|--------------------------------------|-----------------------------------------------------------------------------------------------------------------------------------------------------------------------------------------------------------------------------------------------------------------------------------|-------|-------|-------|-------|
|                                      | amidinotransferase, mitochondrial;<br>AltName: Full=L-arginine:glycine<br>amidinotransferase; AltName:<br>Full=Transamidinase; Flags:<br>Precursor >g                                                                                                                             |       |       |       |       |
| gi 350594954 ref XP_003360<br>054.2  | PREDICTED: adenosine deaminase<br>[Sus scrofa]                                                                                                                                                                                                                                    | 0.473 | 0.933 | 0.854 | 1.307 |
| gi 350582315 ref XP_003481<br>243.1  | PREDICTED: NFU1 iron-sulfur<br>cluster scaffold homolog,<br>mitochondrial-like [Sus scrofa]                                                                                                                                                                                       | 0.809 | 1.818 | 1.689 | 1.055 |
| gi 311276040 ref XP_003135<br>024.1  | PREDICTED: LOW QUALITY<br>PROTEIN: acyl-coenzyme A<br>thioesterase 9, mitochondrial-like<br>[Sus scrofa]                                                                                                                                                                          | 1.339 | 0.598 | 0.958 | 0.858 |
| gi 75074354 sp Q9GL51.3 LI<br>S1_PIG | RecName: Full=Platelet-activating<br>factor acetylhydrolase IB subunit<br>alpha; AltName:<br>Full=Lissencephaly-1 protein;<br>Short=LIS-1; AltName: Full=PAF<br>acetylhydrolase 45 kDa subunit;<br>Short=PAF-AH 45 kDa subunit;<br>AltName: Full=PAF-AH alpha;<br>Short=PAFAH alp | 0.992 | 0.695 | 0.644 | 0.883 |
| gi 350590470 ref XP_003131<br>623.3  | PREDICTED: canalicular<br>multispecific organic anion<br>transporter 2 [Sus scrofa]                                                                                                                                                                                               | 0.962 | 0.719 | 0.732 | 0.732 |
| gi 47522764 ref NP_999133.1<br>      | integrin beta-1 precursor [Sus<br>scrofa] >gi 75050024 sp Q9GLP0.1 I<br>TB1_PIG RecName: Full=Integrin<br>beta-1; AltName: Full=Fibronectin<br>receptor subunit beta; AltName:<br>Full=VLA-4 subunit beta; AltName:<br>CD_antigen=CD29; Flags:<br>Precursor >gi 10336839 gb AAG   | ---   | ---   | ---   | ---   |
| gi 335281543 ref XP_003122<br>613.2  | PREDICTED: protein fat-free<br>homolog [Sus scrofa]                                                                                                                                                                                                                               | ---   | ---   | ---   | ---   |
| gi 350587133 ref XP_001926<br>860.4  | PREDICTED: thyroid<br>receptor-interacting protein 11 [Sus<br>scrofa]                                                                                                                                                                                                             | 0.712 | 1.283 | 0.892 | 1.203 |
| gi 350595681 ref XP_003135<br>172.3  | PREDICTED: structural maintenance<br>of chromosomes protein 1A-like [Sus<br>scrofa]                                                                                                                                                                                               | ---   | ---   | ---   | ---   |
| gi 346716326 ref NP_001231           | SWI/SNF-related matrix-associated                                                                                                                                                                                                                                                 | 0.627 | 0.547 | 0.905 | 0.991 |

|                                   |                                                                                                                                                                                                                                                            |       |       |       |       |
|-----------------------------------|------------------------------------------------------------------------------------------------------------------------------------------------------------------------------------------------------------------------------------------------------------|-------|-------|-------|-------|
| 181.1                             | actin-dependent regulator of chromatin subfamily D member 2 [Sus scrofa]                                                                                                                                                                                   |       |       |       |       |
| gi 145279215 ref NP_001077410.1   | angiotensin-converting enzyme isoform 2 precursor [Sus scrofa] >gi 119381511 gb ABL73884.1  angiotensin I converting enzyme [Sus scrofa]                                                                                                                   | 1.814 | 1.096 | 2.012 | 1.498 |
| gi 311273877 ref XP_003134081.1   | PREDICTED: 28S ribosomal protein S27, mitochondrial-like [Sus scrofa]                                                                                                                                                                                      | 1.338 | 0.635 | 0.986 | 1.095 |
| gi 350587174 ref XP_003356842.2   | PREDICTED: serpin A3-6 [Sus scrofa]                                                                                                                                                                                                                        | 1.228 | 0.874 | 1.477 | 0.914 |
| gi 335295413 ref XP_003130208.2   | PREDICTED: calcium-binding mitochondrial carrier protein Aralar2 [Sus scrofa]                                                                                                                                                                              | 0.922 | 0.459 | 0.572 | 0.493 |
| gi 400294561 gb AFP81702.1        | solute carrier family 27 member 4, partial [Sus scrofa]                                                                                                                                                                                                    | 0.627 | 0.518 | 0.399 | 0.655 |
| gi 183228163 gb ACC59785.1        | PRP19/PSO4 pre-mRNA processing factor 19-like protien [Sus scrofa]                                                                                                                                                                                         | 1.04  | 1.003 | 0.467 | 0.837 |
| gi 190360605 ref NP_001121929.1   | pre-mRNA-processing factor 19 [Sus scrofa] >gi 356995561 dbj BAL14717.1  nuclear matrix protein 200 [Sus scrofa] >gi 171920012 gb ACB59178.1  pre-mRNA processing factor 19 [Sus scrofa]                                                                   |       |       |       |       |
| gi 55926217 ref NP_001007518.1    | cytochrome c oxidase subunit 5B, mitochondrial precursor [Sus scrofa] >gi 75042739 sp Q5S3G4.1 C OX5B_PIG RecName: Full=Cytochrome c oxidase subunit 5B, mitochondrial; AltName: Full=Cytochrome c oxidase polypeptide Vb; Flags: Precursor >gi 55583747 g | 0.467 | 0.331 | 0.397 | 0.379 |
| gi 350580071 ref XP_003122734.3   | PREDICTED: oxysterol-binding protein 1 [Sus scrofa]                                                                                                                                                                                                        | 0.815 | 1.016 | 0.753 | 0.838 |
| gi 148226851 ref NP_001090933.1   | ATP synthase subunit f, mitochondrial [Sus scrofa] >gi 117660512 gb ABK55624.1  mitochondrial Atp5j2 [Sus scrofa]                                                                                                                                          | 0.81  | 0.22  | 0.278 | 0.434 |
| gi 158518654 sp Q95339.4 ATPK_PIG | RecName: Full=ATP synthase subunit f, mitochondrial                                                                                                                                                                                                        |       |       |       |       |
| gi 251764755 sp A6M931.1 I        | RecName: Full=Eukaryotic initiation                                                                                                                                                                                                                        | 1.469 | 0.813 | 0.904 | 1.401 |

|                                 |                                                                                                                                                                                                                                                         |       |       |       |       |
|---------------------------------|---------------------------------------------------------------------------------------------------------------------------------------------------------------------------------------------------------------------------------------------------------|-------|-------|-------|-------|
| F4A3_PIG                        | factor 4A-III; Short=eIF-4A-III; Short=eIF4A-III; AltName: Full=ATP-dependent RNA helicase DDX48; AltName: Full=ATP-dependent RNA helicase eIF4A-3; AltName: Full=DEAD box protein 48; AltName: Full=Eukaryotic trans                                   |       |       |       |       |
| gi 350586361 ref XP_003356557.2 | PREDICTED: serine/threonine-protein kinase PRP4 homolog [Sus scrofa]                                                                                                                                                                                    | 0.523 | 0.604 | 0.573 | 0.522 |
| gi 335290248 ref XP_003127516.2 | PREDICTED: hsp70-binding protein 1-like [Sus scrofa]                                                                                                                                                                                                    | ---   | ---   | ---   | ---   |
| gi 342349338 ref NP_001230145.1 | elaC homolog 2 [Sus scrofa]                                                                                                                                                                                                                             | ---   | ---   | ---   | ---   |
| gi 350590206 ref XP_003131326.3 | PREDICTED: protein kinase C alpha type, partial [Sus scrofa]                                                                                                                                                                                            | ---   | ---   | ---   | ---   |
| gi 49274643 ref NP_001001864.1  | amine oxidase [flavin-containing] B [Sus scrofa] >gi 62899647 sp Q6PLK3.3 A OFB_PIG RecName: Full=Amine oxidase [flavin-containing] B; AltName: Full=Monoamine oxidase type B; Short=MAO-B >gi 46909483 gb AAT06259.1  monoamine oxidase B [Sus scrofa] | 0.901 | 0.405 | 0.432 | 0.776 |
| gi 335280279 ref XP_001928782.2 | PREDICTED: 26S protease regulatory subunit 10B [Sus scrofa]                                                                                                                                                                                             | 1.174 | 0.812 | 0.717 | 1.112 |
| gi 350583020 ref XP_003481419.1 | PREDICTED: zinc finger protein 706-like [Sus scrofa]                                                                                                                                                                                                    | 1.271 | 1.945 | 2.395 | 1.9   |
| gi 195539476 ref NP_001124208.1 | bifunctional purine biosynthesis protein PURH [Sus scrofa] >gi 192383834 gb ACF04802.1  5-aminoimidazole-4-carboxamide ribonucleotide formyltransferase/IMP cyclohydrolase [Sus scrofa]                                                                 | 1.674 | 0.855 | 1.284 | 1.949 |
| gi 113205898 ref NP_001038078.1 | microtubule-associated protein RP/EB family member 1 [Sus scrofa] >gi 81174752 gb ABB58918.1  microtubule-associated protein RP/EB family member 1 [Sus scrofa]                                                                                         | ---   | ---   | ---   | ---   |
| gi 335308271 ref XP_003361      | PREDICTED: pre-mRNA-processing                                                                                                                                                                                                                          | ---   | ---   | ---   | ---   |



|                                   |                                                                                                                                                                                                                                                           |       |       |       |       |
|-----------------------------------|-----------------------------------------------------------------------------------------------------------------------------------------------------------------------------------------------------------------------------------------------------------|-------|-------|-------|-------|
| 162.1                             | factor 6-like [Sus scrofa]                                                                                                                                                                                                                                |       |       |       |       |
| gi 60394813 sp Q29201.4 RS16_PIG  | RecName: Full=40S ribosomal protein S16 >gi 212549659 ref NP_001131092.1  40S ribosomal protein S16 [Sus scrofa] >gi 335289675 ref XP_003355953.1  PREDICTED: 40S ribosomal protein S16-like isoform 2 [Sus scrofa] >gi 335289677 ref XP_003355954.1  PRE | 1.01  | 0.711 | 0.563 | 1.304 |
| gi 350588052 ref XP_003357166.2   | PREDICTED: importin-7, partial [Sus scrofa]                                                                                                                                                                                                               | 1.07  | 1.011 | 0.855 | 0.961 |
| gi 222090420 gb ACM42418.1        | carnitine palmitoyltransferase II [Sus scrofa]                                                                                                                                                                                                            | 1.253 | 0.307 | 0.223 | 0.492 |
| gi 229358270 gb ACQ57802.1        | mitochondrial carnitine palmitoyltransferase II [Sus scrofa]                                                                                                                                                                                              |       |       |       |       |
| gi 350536125 ref NP_001233172.1   | carnitine O-palmitoyltransferase 2, mitochondrial precursor [Sus scrofa] >gi 294805368 gb ADF42518.1  mitochondrial carnitine palmitoyltransferase II [Sus scrofa]                                                                                        |       |       |       |       |
| gi 113205668 ref NP_001038021.1   | microsomal glutathione S-transferase 3 [Sus scrofa] >gi 120564453 gb ABM30152.1  microsomal glutathione S-transferase 3 [Sus scrofa] >gi 87047644 gb ABD18455.1  microsomal glutathione S-transferase 3 [Sus scrofa]                                      | 1.689 | 0.87  | 0.986 | 0.95  |
| gi 335309593 ref XP_003361696.1   | PREDICTED: 39S ribosomal protein L12, mitochondrial-like, partial [Sus scrofa]                                                                                                                                                                            | 0.419 | 0.93  | 0.562 | 0.587 |
| gi 346716090 ref NP_001231205.1   | thioredoxin-like protein 1 [Sus scrofa]                                                                                                                                                                                                                   | 1.061 | 0.842 | 0.83  | 0.965 |
| gi 12055551 emb CAC21172.1        | diazepam binding inhibitor [Sus scrofa]                                                                                                                                                                                                                   | 1.667 | 2.489 | 2.516 | 1.486 |
| gi 110825776 sp P12026.2 ACBP_PIG | RecName: Full=Acyl-CoA-binding protein; Short=ACBP; AltName: Full=Diazepam-binding inhibitor; Short=DBI; AltName: Full=Endozepine; Short=EP; Contains: RecName: Full=DBI(32-86) >gi 47523046 ref N                                                        |       |       |       |       |

|                                    |                                                                                                                                         |       |       |       |       |
|------------------------------------|-----------------------------------------------------------------------------------------------------------------------------------------|-------|-------|-------|-------|
|                                    | P_999284.1  acyl-CoA-binding protein [Sus scrofa] >gi 1                                                                                 |       |       |       |       |
| gi 281427368 ref NP_001163992.1    | steroid hormone receptor ERR1 [Sus scrofa] >gi 229609707 gb ACQ83469.1  ERRa [Sus scrofa]                                               | ---   | ---   | ---   | ---   |
| gi 297632416 ref NP_001172092.1    | enhancer of rudimentary homolog [Sus scrofa]                                                                                            | 0.36  | 0.948 | 1.154 | 0.569 |
| gi 118403852 ref NP_001072139.1    | UBC1 [Sus scrofa] >gi 115371727 gb ABI96188.1  UBC1 [Sus scrofa]                                                                        | 1.67  | 1.155 | 1.259 | 1.448 |
| gi 343887409 ref NP_001230603.1    | deoxynucleotidyltransferase terminal-interacting protein 2 [Sus scrofa]                                                                 | ---   | ---   | ---   | ---   |
| gi 347300356 ref NP_001231473.1    | uncharacterized protein LOC100689297 [Sus scrofa]                                                                                       | 1.224 | 1.686 | 1.919 | 1.106 |
| gi 311247993 ref XP_003122918.1    | PREDICTED: probable methylthioribulose-1-phosphate dehydratase-like [Sus scrofa]                                                        | 1.308 | 1.874 | 2.593 | 1.715 |
| gi 349732262 ref NP_001231870.1    | 3-hydroxyanthranilate 3,4-dioxygenase [Sus scrofa]                                                                                      | 0.477 | 0.418 | 0.343 | 0.525 |
| gi 311252389 ref XP_003125056.1    | PREDICTED: STAM-binding protein [Sus scrofa]                                                                                            | ---   | ---   | ---   | ---   |
| gi 343790890 ref NP_001230503.1    | acyl-CoA dehydrogenase family, member 8 [Sus scrofa]                                                                                    | 1.868 | 1.044 | 1.462 | 1.699 |
| gi 343780946 ref NP_001230486.1    | D-dopachrome decarboxylase [Sus scrofa]                                                                                                 | 1.248 | 1.873 | 1.422 | 1.566 |
| gi 335289112 ref XP_003126904.2    | PREDICTED: lysyl-tRNA synthetase isoform 1 [Sus scrofa]                                                                                 | 1.504 | 0.655 | 0.639 | 1.189 |
| gi 335289114 ref XP_003355791.1    | PREDICTED: lysyl-tRNA synthetase isoform 2 [Sus scrofa]                                                                                 |       |       |       |       |
| gi 350587855 ref XP_003129278.3    | PREDICTED: protein transport protein Sec24D [Sus scrofa]                                                                                | ---   | ---   | ---   | ---   |
| gi 335309819 ref XP_003361783.1    | PREDICTED: charged multivesicular body protein 2a-like, partial [Sus scrofa]                                                            | ---   | ---   | ---   | ---   |
| gi 113205716 ref NP_001038033.1    | 1,5-anhydro-D-fructose reductase [Sus scrofa] >gi 94421324 gb ABF18830.1  putative aldo-keto reductase family 1 member CL2 [Sus scrofa] | 1.44  | 1.224 | 0.906 | 1.522 |
| gi 239938601 sp P82125.2 AKCL2_PIG | RecName: Full=1,5-anhydro-D-fructose                                                                                                    |       |       |       |       |

|                                 |                                                                                                                                                                                                                                 |       |       |       |       |
|---------------------------------|---------------------------------------------------------------------------------------------------------------------------------------------------------------------------------------------------------------------------------|-------|-------|-------|-------|
|                                 | reductase; Short=AF reductase; AltName: Full=Aldo-keto reductase family 1 member C-like protein 2; Short=Aldo-keto reductase family 1 member CL2; AltName: Full=Aldo-keto reductase family 1 member E2                          |       |       |       |       |
| gi 350589668 ref XP_003482894.1 | PREDICTED: 1,5-anhydro-D-fructose reductase-like [Sus scrofa]                                                                                                                                                                   |       |       |       |       |
| gi 311258972 ref XP_003127870.1 | PREDICTED: adenylyl cyclase-associated protein 1-like [Sus scrofa]                                                                                                                                                              | ---   | ---   | ---   | ---   |
| gi 266686 sp P29804.1 ODPA_PIG  | RecName: Full=Pyruvate dehydrogenase E1 component subunit alpha, somatic form, mitochondrial; AltName: Full=PDHE1-A type I; Flags: Precursor >gi 1851 emb CAA37180.1 pyruvate dehydrogenase (lipoamide) [Sus scrofa domesticus] | 1.493 | 0.329 | 0.515 | 0.96  |
| gi 448580 prf 1917268A          | pyruvate dehydrogenase:SUBUNIT=alpha                                                                                                                                                                                            |       |       |       |       |
| gi 350595555 ref XP_003360292.2 | PREDICTED: pyruvate dehydrogenase E1 component subunit alpha, somatic form, mitochondrial isoform 1 [Sus scrofa]                                                                                                                |       |       |       |       |
| gi 350595557 ref XP_003484129.1 | PREDICTED: pyruvate dehydrogenase E1 component subunit alpha, somatic form, mitochondrial isoform 2 [Sus scrofa]                                                                                                                |       |       |       |       |
| gi 350539577 ref NP_001233167.1 | coatomer subunit gamma-2 [Sus scrofa] >gi 301087607 gb ADK56184.1  coatomer protein complex subunit gamma 2 [Sus scrofa]                                                                                                        | 1.059 | 0.472 | 0.381 | 0.867 |
| gi 1262435 emb CAA61864.1       | put. 26S protease subunit [Sus scrofa]                                                                                                                                                                                          | 0.765 | 0.82  | 0.599 | 0.929 |
| gi 47522792 ref NP_999148.1     | 26S protease regulatory subunit 8 [Sus scrofa] >gi 49065781 sp P62197.1 PRS8_PIG RecName: Full=26S protease regulatory subunit 8; AltName: Full=26S proteasome AAA-ATPase                                                       |       |       |       |       |

|                                    |                                                                                                                                                             |       |       |       |       |
|------------------------------------|-------------------------------------------------------------------------------------------------------------------------------------------------------------|-------|-------|-------|-------|
|                                    | subunit RPT6; AltName: Full=Proteasome 26S subunit ATPase 5; AltName: Full=Prot                                                                             |       |       |       |       |
| gi 311252444 ref XP_003125100.1    | PREDICTED: small nuclear ribonucleoprotein G-like [Sus scrofa]                                                                                              | 0.638 | 0.44  | 0.527 | 0.508 |
| gi 194036463 ref XP_001928684.1    | PREDICTED: ras-related protein Rap-1A isoform 1 [Sus scrofa] >gi 335287176 ref XP_003355289.1  PREDICTED: ras-related protein Rap-1A isoform 2 [Sus scrofa] | 0.726 | 0.228 | 0.197 | 0.487 |
| gi 350584241 ref XP_003481702.1    | PREDICTED: ras-related protein Rap-1b [Sus scrofa] >gi 350596871 ref XP_003484329.1  PREDICTED: ras-related protein Rap-1b-like [Sus scrofa]                |       |       |       |       |
| gi 51512143 gb AAU05316.1          | hepatitis B virus x interacting protein [Sus scrofa]                                                                                                        | ---   | ---   | ---   | ---   |
| gi 187471167 sp Q66X52.2 HBXIP_PIG | RecName: Full=Hepatitis B virus X-interacting protein homolog; Short=HBV X-interacting protein homolog; Short=HBX-interacting protein homolog               |       |       |       |       |
| gi 335307770 ref XP_003360968.1    | PREDICTED: hepatitis B virus X-interacting protein homolog, partial [Sus scrofa]                                                                            |       |       |       |       |
| gi 350595155 ref XP_003360146.2    | PREDICTED: maltase-glucoamylase, intestinal-like, partial [Sus scrofa]                                                                                      | 0.458 | 0.608 | 0.571 | 0.338 |
| gi 350597052 ref XP_003361964.2    | PREDICTED: maltase-glucoamylase, intestinal-like, partial [Sus scrofa]                                                                                      |       |       |       |       |
| gi 350580871 ref XP_003123769.3    | PREDICTED: ras GTPase-activating-like protein IQGAP2-like [Sus scrofa]                                                                                      | 0.962 | 0.63  | 0.649 | 1.002 |
| gi 345199274 ref NP_001230825.1    | glutaredoxin 3 [Sus scrofa]                                                                                                                                 | 1.323 | 0.863 | 0.929 | 1.587 |
| gi 335283420 ref XP_003123942.2    | PREDICTED: protein PRRC1-like, partial [Sus scrofa]                                                                                                         | 1.596 | 1.527 | 0.935 | 1.343 |
| gi 335301657 ref XP_001929317.3    | PREDICTED: coiled-coil domain-containing protein 6 [Sus scrofa]                                                                                             | ---   | ---   | ---   | ---   |
| gi 335308509 ref XP_003361258.1    | PREDICTED: microsomal glutathione S-transferase 2-like,                                                                                                     | 0.711 | 0.282 | 0.335 | 0.585 |

|                                   |                                                                                                                                                                                                                                                           |       |       |       |       |
|-----------------------------------|-----------------------------------------------------------------------------------------------------------------------------------------------------------------------------------------------------------------------------------------------------------|-------|-------|-------|-------|
|                                   | partial [Sus scrofa]                                                                                                                                                                                                                                      |       |       |       |       |
| gi 346421419 ref NP_001231084.1   | lysosome membrane protein 2 precursor [Sus scrofa]                                                                                                                                                                                                        | 0.696 | 0.52  | 0.332 | 0.768 |
| gi 163915141 ref NP_001106518.1   | carnitine O-acetyltransferase [Sus scrofa] >gi 162852671 emb CAP49176.1  carnitine acetyl transferase [Sus scrofa]                                                                                                                                        | 1.806 | 1.038 | 1.109 | 1.343 |
| gi 239504558 ref NP_001155112.1   | caspase-10 [Sus scrofa] >gi 229365449 dbj BAH57972.1  caspase 10 [Sus scrofa]                                                                                                                                                                             | 1.116 | 0.668 | 0.738 | 0.988 |
| gi 350590094 ref XP_003357986.2   | PREDICTED: putative sodium-coupled neutral amino acid transporter 10 isoform 1 [Sus scrofa]                                                                                                                                                               | ---   | ---   | ---   | ---   |
| gi 350590096 ref XP_003482987.1   | PREDICTED: putative sodium-coupled neutral amino acid transporter 10 isoform 2 [Sus scrofa]                                                                                                                                                               |       |       |       |       |
| gi 62510530 sp Q8MJ30.1 D HPR_PIG | RecName: Full=Dihydropteridine reductase; AltName: Full=HDHPR; AltName: Full=Quinoid dihydropteridine reductase >gi 47523746 ref NP_99508.1  dihydropteridine reductase [Sus scrofa] >gi 22094813 gb AAM91996.1 AF526879_1 quinoid dihydropteridine redu  | ---   | ---   | ---   | ---   |
| gi 164023822 ref NP_001106688.1   | 60S ribosomal protein L7 [Sus scrofa] >gi 56384247 gb AAV85772.1  ribosomal protein L7 [Sus scrofa]                                                                                                                                                       | 0.808 | 0.736 | 0.535 | 1.166 |
| gi 47522730 ref NP_999115.1       | 60S ribosomal protein L29 [Sus scrofa] >gi 51704218 sp Q95281.4 RL29_PIG RecName: Full=60S ribosomal protein L29 >gi 4586439 dbj BAA76404.1  ribosomal protein L29/heparin/heparan sulfate interacting protein [Sus scrofa] >gi 4586433 dbj BAA76401.1  r | 0.323 | 0.44  | 0.287 | 0.306 |
| gi 350591380 ref XP_003358554.2   | PREDICTED: ADP-ribosylation factor-like protein 8B-like, partial [Sus scrofa]                                                                                                                                                                             | 1.719 | 1.334 | ---   | 1.377 |
| gi 356582297 ref NP_001239143.1   | ADP-ribosylation factor-like 8B [Sus scrofa]                                                                                                                                                                                                              |       |       |       |       |

|                                   |                                                                                                                                                                                                                                                           |       |       |       |       |
|-----------------------------------|-----------------------------------------------------------------------------------------------------------------------------------------------------------------------------------------------------------------------------------------------------------|-------|-------|-------|-------|
| gi 194474046 ref NP_001124006.1   | 1-acyl-sn-glycerol-3-phosphate acyltransferase beta precursor [Sus scrofa] >gi 262036915 dbj BAI47593.1  1-acylglycerol-3-phosphate O-acyltransferase 2 [Sus scrofa] >gi 216408319 gb ACJ72850.1  1-acylglycerol-3-phosphate O-acyltransferase 2 [Sus scr | 0.835 | 0.385 | 0.563 | 0.422 |
| gi 311256096 ref XP_003126504.1   | PREDICTED: epidermal growth factor receptor kinase substrate 8 [Sus scrofa]                                                                                                                                                                               | 1.005 | 1.468 | 1.663 | 1.18  |
| gi 350578257 ref XP_001927626.3   | PREDICTED: heterogeneous nuclear ribonucleoprotein Q isoform 1 [Sus scrofa]                                                                                                                                                                               | ---   | ---   | ---   | ---   |
| gi 319401911 ref NP_001188310.1   | adenosylhomocysteinase-like protein 1 [Sus scrofa] >gi 315321422 gb ADU04838.1  adenosylhomocysteinase-like protein 1 [Sus scrofa]                                                                                                                        | ---   | ---   | ---   | ---   |
| gi 335293809 ref XP_003129222.2   | PREDICTED: SWI/SNF-related matrix-associated actin-dependent regulator of chromatin subfamily A member 5 [Sus scrofa]                                                                                                                                     | ---   | ---   | ---   | ---   |
| gi 21263966 sp O97580.1 SUCB1_PIG | RecName: Full=Succinyl-CoA ligase [ADP-forming] subunit beta, mitochondrial; AltName: Full=ATP-specific succinyl-CoA synthetase subunit beta; AltName: Full=Succinyl-CoA synthetase beta-A chain; Short=SCS-betaA; Flags: Precursor >gi 3808237 gb AAC697 | 1.603 | 0.886 | 0.685 | 1.279 |
| gi 311266259 ref XP_003131022.1   | PREDICTED: succinyl-CoA ligase [ADP-forming] subunit beta, mitochondrial [Sus scrofa]                                                                                                                                                                     |       |       |       |       |
| gi 350584784 ref XP_003481823.1   | PREDICTED: acyl-CoA synthetase family member 3, mitochondrial-like [Sus scrofa]                                                                                                                                                                           | ---   | ---   | ---   | ---   |
| gi 311272155 ref XP_003133324.1   | PREDICTED: activated RNA polymerase II transcriptional coactivator p15-like [Sus scrofa]                                                                                                                                                                  | 1.272 | 0.887 | 1.028 | 0.92  |
| gi 164664444 ref NP_001106907.1   | alpha-2-macroglobulin receptor-associated protein precursor [Sus                                                                                                                                                                                          | 0.444 | 0.486 | 0.435 | 0.456 |

|                                  |                                                                                                                                                                     |       |       |       |       |
|----------------------------------|---------------------------------------------------------------------------------------------------------------------------------------------------------------------|-------|-------|-------|-------|
|                                  | scrofa] >gi 162946612 gb ABY21262.1  alpha-2-macroglobulin receptor-associated protein [Sus scrofa]                                                                 |       |       |       |       |
| gi 1709973 sp P53027.3 RL10A_PIG | RecName: Full=60S ribosomal protein L10a                                                                                                                            | 1.019 | 0.786 | 0.75  | 1.14  |
| gi 350584352 ref XP_001926213.3  | PREDICTED: putative deoxyribose-phosphate aldolase-like [Sus scrofa]                                                                                                | 1.499 | 0.84  | 1.311 | 1.266 |
| gi 345091011 ref NP_001230734.1  | PCTP-like protein [Sus scrofa]                                                                                                                                      | 1.458 | 0.724 | 0.904 | 1.656 |
| gi 335286933 ref XP_003355223.1  | PREDICTED: 39S ribosomal protein L9, mitochondrial-like isoform 1 [Sus scrofa]                                                                                      | ---   | ---   | ---   | ---   |
| gi 335286935 ref XP_003355224.1  | PREDICTED: 39S ribosomal protein L9, mitochondrial-like isoform 2 [Sus scrofa]                                                                                      |       |       |       |       |
| gi 335286937 ref XP_003355225.1  | PREDICTED: 39S ribosomal protein L9, mitochondrial-like isoform 3 [Sus scrofa]                                                                                      |       |       |       |       |
| gi 335285324 ref XP_003354827.1  | PREDICTED: prenylcysteine oxidase-like [Sus scrofa]                                                                                                                 | 1.016 | 0.403 | 0.147 | 0.77  |
| gi 350580104 ref XP_003353925.2  | PREDICTED: mitochondrial carrier homolog 2 [Sus scrofa]                                                                                                             | 0.732 | ---   | 0.78  | 1.032 |
| gi 335297415 ref XP_003358038.1  | PREDICTED: 60S ribosomal protein L38-like isoform 2 [Sus scrofa] >gi 311266862 ref XP_003131289.1  PREDICTED: 60S ribosomal protein L38-like isoform 1 [Sus scrofa] | 0.659 | 0.354 | 0.29  | 0.677 |
| gi 350589263 ref XP_003130553.2  | PREDICTED: isoleucyl-tRNA synthetase, mitochondrial [Sus scrofa]                                                                                                    | ---   | ---   | ---   | ---   |
| gi 350589265 ref XP_003482824.1  | PREDICTED: isoleucyl-tRNA synthetase, mitochondrial-like [Sus scrofa]                                                                                               |       |       |       |       |
| gi 311258593 ref XP_003127690.1  | PREDICTED: adaptin ear-binding coat-associated protein 2-like [Sus scrofa]                                                                                          | ---   | ---   | ---   | ---   |
| gi 350590733 ref XP_003131874.3  | PREDICTED: pre-mRNA-processing-splicing factor 8, partial [Sus scrofa]                                                                                              | 1.245 | 0.745 | 0.327 | 1.182 |

|                                 |                                                                                                                                                                                                                                                    |       |       |       |       |
|---------------------------------|----------------------------------------------------------------------------------------------------------------------------------------------------------------------------------------------------------------------------------------------------|-------|-------|-------|-------|
| gi 171465894 gb ACB46190.1      | solute carrier family 3 member 2 [Sus scrofa]                                                                                                                                                                                                      | 1.19  | 1.317 | 1.335 | 1.619 |
| gi 335281655 ref XP_003353857.1 | PREDICTED: 4F2 cell-surface antigen heavy chain [Sus scrofa]                                                                                                                                                                                       |       |       |       |       |
| gi 335290721 ref XP_003356259.1 | PREDICTED: platelet-activating factor acetylhydrolase 2, cytoplasmic-like [Sus scrofa]                                                                                                                                                             | ---   | ---   | ---   | ---   |
| gi 350589961 ref XP_003482962.1 | PREDICTED: LIM domain only protein 7-like [Sus scrofa]                                                                                                                                                                                             | ---   | ---   | ---   | ---   |
| gi 350594202 ref XP_003133916.3 | PREDICTED: threonyl-tRNA synthetase, cytoplasmic-like [Sus scrofa]                                                                                                                                                                                 | 1.321 | 1.138 | 1.101 | 1.8   |
| gi 121118 sp P20305.1 GELS_PIG  | RecName: Full=Gelsolin; AltName: Full=Actin-depolymerizing factor; Short=ADF; AltName: Full=Brevin; Flags:<br>Precursor >gi 164472 gb AAA31042.1  plasma gelsolin precursor, partial [Sus scrofa] >gi 758306 emb CAA32077.1  gelsolin [Sus scrofa] | 0.313 | 0.654 | 0.571 | 0.497 |
| gi 350587978 ref XP_003129373.3 | PREDICTED: protein FAM13A-like [Sus scrofa]                                                                                                                                                                                                        | 0.659 | 0.866 | 0.618 | 0.781 |
| gi 311260959 ref XP_003128594.1 | PREDICTED: magnesium-dependent phosphatase 1-like [Sus scrofa]                                                                                                                                                                                     | ---   | ---   | ---   | ---   |
| gi 335308200 ref XP_003361139.1 | PREDICTED: ADP-sugar pyrophosphatase-like [Sus scrofa]                                                                                                                                                                                             | 0.954 | 0.904 | 0.3   | 0.59  |
| gi 350589627 ref XP_003482885.1 | PREDICTED: ADP-sugar pyrophosphatase-like isoform 2 [Sus scrofa] >gi 350589625 ref XP_003482884.1  PREDICTED: ADP-sugar pyrophosphatase-like isoform 1 [Sus scrofa]                                                                                |       |       |       |       |
| gi 147832425 emb CAN59677.1     | HLA-B associated transcript 3 [Sus scrofa]                                                                                                                                                                                                         | 0.548 | 0.744 | 0.786 | 0.679 |
| gi 147832426 emb CAN59678.1     | HLA-B associated transcript 3 [Sus scrofa]                                                                                                                                                                                                         |       |       |       |       |
| gi 162138209 gb ABX82810.1      | HLA-B-associated protein 3 [Sus scrofa]                                                                                                                                                                                                            |       |       |       |       |
| gi 223950621 ref NP_001138854.1 | large proline-rich protein BAG6 [Sus scrofa] >gi 317374853 sp A5D9M6.1  BAG6_PIG RecName: Full=Large                                                                                                                                               |       |       |       |       |



|                                 |                                                                                                                                                          |       |       |       |       |
|---------------------------------|----------------------------------------------------------------------------------------------------------------------------------------------------------|-------|-------|-------|-------|
|                                 | proline-rich protein BAG6; AltName: Full=BCL2-associated athanogene 6; AltName: Full=HLA-B-associated transcript<br>3 >gi 147832424 emb CAN59676.1  HLA- |       |       |       |       |
| gi 350580973 ref XP_003123871.3 | PREDICTED: alpha-mannosidase 2 [Sus scrofa]                                                                                                              | 1.133 | 0.658 | 0.917 | 0.809 |
| gi 350583728 ref XP_003126027.3 | PREDICTED: protein kinase C and casein kinase substrate in neurons protein 2-like [Sus scrofa]                                                           | ---   | ---   | ---   | ---   |
| gi 350588987 ref XP_003130351.3 | PREDICTED: protein PRRC2C [Sus scrofa]                                                                                                                   | ---   | ---   | ---   | ---   |
| gi 359465576 ref NP_001240753.1 | A-kinase anchor protein 9 [Sus scrofa]                                                                                                                   | 0.772 | 1.137 | 0.982 | 0.663 |
| gi 311254196 ref XP_003125793.1 | PREDICTED: double-stranded RNA-specific adenosine deaminase, partial [Sus scrofa]                                                                        | 0.75  | 1.18  | 1.736 | 1.162 |
| gi 311270046 ref XP_003132745.1 | PREDICTED: 60S ribosomal protein L24-like isoform 1 [Sus scrofa]                                                                                         | 0.42  | 0.371 | 0.263 | 0.418 |
| gi 57527982 ref NP_001009576.1  | radixin [Sus scrofa] >gi 131821 sp P26044.1 RADI_PIG RecName: Full=Radixin; AltName: Full=Moesin-B >gi 164586 gb AAB02865.1  moesin B [Sus scrofa]       | ---   | ---   | ---   | ---   |
| gi 335292025 ref XP_003128369.2 | PREDICTED: butyrophilin subfamily 1 member A1-like [Sus scrofa]                                                                                          | 0.82  | 0.746 | 0.935 | 0.779 |
| gi 350586526 ref XP_003482206.1 | PREDICTED: butyrophilin-like protein 1-like [Sus scrofa]                                                                                                 |       |       |       |       |
| gi 311248954 ref XP_003123394.1 | PREDICTED: methylthioribose-1-phosphate isomerase [Sus scrofa]                                                                                           | 1.08  | 0.841 | 0.697 | 1.123 |
| gi 335290012 ref XP_003356047.1 | PREDICTED: protein arginine N-methyltransferase 1 isoform 1 [Sus scrofa]                                                                                 | 1.589 | 0.772 | 0.747 | 1.434 |
| gi 335290016 ref XP_003356049.1 | PREDICTED: protein arginine N-methyltransferase 1 isoform 3 [Sus scrofa]                                                                                 |       |       |       |       |
| gi 350581874 ref XP_003124716.3 | PREDICTED: rab11 family-interacting protein 3-like [Sus scrofa]                                                                                          | 0.509 | 0.444 | 0.527 | 0.474 |

|                                 |                                                                                                                                                                                                                                                           |       |       |       |       |
|---------------------------------|-----------------------------------------------------------------------------------------------------------------------------------------------------------------------------------------------------------------------------------------------------------|-------|-------|-------|-------|
| gi 47523066 ref NP_999296.1     | caspase-3 [Sus scrofa] >gi 54035961 sp Q95ND5.1 CASP3_PIG RecName: Full=Caspase-3; Short=CASP-3; Contains: RecName: Full=Caspase-3 subunit p17; Contains: RecName: Full=Caspase-3 subunit p12; Flags: Precursor >gi 14090240 dbj BAB55544.1  caspase-3 [S | 1.672 | 1.439 | 1.284 | 1.702 |
| gi 335290940 ref XP_003356338.1 | PREDICTED: histone-binding protein RBBP4-like [Sus scrofa]                                                                                                                                                                                                | ---   | ---   | ---   | ---   |
| gi 346986460 ref NP_001231381.1 | AP-2 complex subunit sigma isoform 1 [Sus scrofa]                                                                                                                                                                                                         | ---   | ---   | ---   | ---   |
| gi 194038455 ref XP_001928714.1 | PREDICTED: arginase-2, mitochondrial [Sus scrofa]                                                                                                                                                                                                         | 1.045 | 1.8   | 1.849 | 1.528 |
| gi 350579579 ref XP_001925536.4 | PREDICTED: 26S proteasome non-ATPase regulatory subunit 5 [Sus scrofa]                                                                                                                                                                                    | 2.285 | 0.861 | 0.75  | 1.323 |
| gi 346421378 ref NP_001231061.1 | serpin H1 precursor [Sus scrofa]                                                                                                                                                                                                                          | 0.667 | 0.74  | 0.49  | 0.32  |
| gi 347543818 ref NP_001231565.1 | cytochrome P450, family 4, subfamily F, polypeptide 55 precursor [Sus scrofa]                                                                                                                                                                             | 0.959 | 0.472 | 0.472 | 0.986 |
| gi 349585046 ref NP_001231798.1 | uncharacterized protein LOC100513647 [Sus scrofa]                                                                                                                                                                                                         | 1.129 | 1.102 | 1.159 | 1.01  |
| gi 346421403 ref NP_001231076.1 | translocon-associated protein subunit gamma [Sus scrofa]                                                                                                                                                                                                  | ---   | ---   | ---   | ---   |
| gi 350580262 ref XP_003123007.3 | PREDICTED: pleckstrin homology domain-containing family A member 7 [Sus scrofa]                                                                                                                                                                           | 0.79  | 0.737 | 0.979 | 0.755 |
| gi 350596440 ref XP_003484272.1 | PREDICTED: elongation factor Tu GTP-binding domain-containing protein 1 [Sus scrofa]                                                                                                                                                                      | ---   | ---   | ---   | ---   |
| gi 335288532 ref XP_001925819.3 | PREDICTED: ubiquitin carboxyl-terminal hydrolase 5 isoform 1 [Sus scrofa]                                                                                                                                                                                 | 0.985 | 1.005 | 1.02  | 1.252 |
| gi 335288534 ref XP_003355644.1 | PREDICTED: ubiquitin carboxyl-terminal hydrolase 5 isoform 2 [Sus scrofa]                                                                                                                                                                                 |       |       |       |       |
| gi 350593631 ref XP_003359617.2 | PREDICTED: LOW QUALITY PROTEIN: alkylldihydroxyacetonephosphate                                                                                                                                                                                           | 1.415 | 1.103 | 1.169 | 1.625 |

|                                 |                                                                                                                                                                                                                                                           |       |       |       |       |
|---------------------------------|-----------------------------------------------------------------------------------------------------------------------------------------------------------------------------------------------------------------------------------------------------------|-------|-------|-------|-------|
|                                 | synthase, peroxisomal [Sus scrofa]                                                                                                                                                                                                                        |       |       |       |       |
| gi 311274849 ref XP_001925742.2 | PREDICTED: regulation of nuclear pre-mRNA domain-containing protein 1B [Sus scrofa]                                                                                                                                                                       | 0.672 | 1.313 | 0.928 | 0.755 |
| gi 311247401 ref XP_003122628.1 | PREDICTED: peptidyl-prolyl cis-trans isomerase FKBP2-like isoform 1 [Sus scrofa]                                                                                                                                                                          | 0.659 | 0.769 | 0.771 | 0.931 |
| gi 335281587 ref XP_003353839.1 | PREDICTED: peptidyl-prolyl cis-trans isomerase FKBP2-like isoform 4 [Sus scrofa] >gi 335281583 ref XP_003353837.1  PREDICTED: peptidyl-prolyl cis-trans isomerase FKBP2-like isoform 2 [Sus scrofa] >gi 335281585 ref XP_003353838.1  PREDICTED: peptidyl |       |       |       |       |
| gi 335308437 ref XP_003361229.1 | PREDICTED: nodal modulator 1, partial [Sus scrofa]                                                                                                                                                                                                        | ---   | ---   | ---   | ---   |
| gi 171986635 gb ACB59309.1      | intelectin 2 [Sus scrofa]                                                                                                                                                                                                                                 | 1.352 | 0.631 | 0.358 | 0.858 |
| gi 350583241 ref XP_003481467.1 | PREDICTED: intelectin-2-like [Sus scrofa]                                                                                                                                                                                                                 |       |       |       |       |
| gi 194042631 ref XP_001925414.1 | PREDICTED: ATP-binding cassette sub-family B member 10, mitochondrial-like [Sus scrofa]                                                                                                                                                                   | ---   | ---   | ---   | ---   |
| gi 346986378 ref NP_001231341.1 | heme oxygenase 2 [Sus scrofa]                                                                                                                                                                                                                             | 0.834 | 0.975 | 0.848 | 0.916 |
| gi 335305501 ref XP_003134862.2 | PREDICTED: E3 ubiquitin-protein ligase ZNRF2-like [Sus scrofa]                                                                                                                                                                                            | 0.453 | 1.019 | 1.358 | 0.815 |
| gi 164302 gb AAA30983.1         | alpha-1 acid glycoprotein, partial [Sus scrofa]                                                                                                                                                                                                           | 0.263 | 0.696 | 0.494 | 0.699 |
| gi 350579533 ref XP_003480630.1 | PREDICTED: alpha-1-acid glycoprotein-like [Sus scrofa] >gi 194033903 ref XP_001928762.1  PREDICTED: alpha-1-acid glycoprotein [Sus scrofa]                                                                                                                |       |       |       |       |
| gi 297747284 ref NP_001172109.1 | prefoldin subunit 6 [Sus scrofa] >gi 297747282 ref NP_001172108.1  prefoldin subunit 6 [Sus scrofa]                                                                                                                                                       | 1.246 | 1.047 | 1.771 | 1.188 |
| gi 343887362 ref NP_001230582.1 | small nuclear ribonucleoprotein Sm D2 [Sus scrofa]                                                                                                                                                                                                        | 0.577 | 0.588 | 0.599 | 0.648 |

|                                   |                                                                                                                                                                                                                                                           |       |       |       |       |
|-----------------------------------|-----------------------------------------------------------------------------------------------------------------------------------------------------------------------------------------------------------------------------------------------------------|-------|-------|-------|-------|
| gi 335280302 ref XP_003353540.1   | PREDICTED: actin-related protein 10-like [Sus scrofa]                                                                                                                                                                                                     | ---   | ---   | ---   | ---   |
| gi 52001458 sp P22411.3 DP P4_PIG | RecName: Full=Dipeptidyl peptidase 4; AltName: Full=Dipeptidyl peptidase IV; Short=DPP IV; AltName: Full=T-cell activation antigen CD26; AltName: CD_antigen=CD26; Contains: RecName: Full=Dipeptidyl peptidase 4 membrane form; AltName: Full=Dipeptidyl | 0.986 | 1.192 | 1.335 | 1.094 |
| gi 90108717 pdb 2AJC D            | Chain D, Porcine Dipeptidyl Peptidase Iv (Cd26) In Complex With 4-(2- Aminoethyl)-Benzene Sulphonyl Fluoride (Aebsf) >gi 90108715 pdb 2AJC B Chain B, Porcine Dipeptidyl Peptidase Iv (Cd26) In Complex With 4-(2- Aminoethyl)-Benzene Sulphonyl Fluoride |       |       |       |       |
| gi 350588982 ref XP_003130335.2   | PREDICTED: thiamin pyrophosphokinase 1-like [Sus scrofa]                                                                                                                                                                                                  | ---   | ---   | ---   | ---   |
| gi 194035181 ref XP_001925325.1   | PREDICTED: sphingomyelin phosphodiesterase 2 [Sus scrofa]                                                                                                                                                                                                 | ---   | ---   | ---   | ---   |
| gi 350593416 ref XP_003483680.1   | PREDICTED: BAG family molecular chaperone regulator 4-like [Sus scrofa]                                                                                                                                                                                   | 0.782 | 1.77  | 1.183 | 0.995 |
| gi 311274558 ref XP_003134376.1   | PREDICTED: vacuolar protein sorting-associated protein 16 homolog isoform 1 [Sus scrofa]                                                                                                                                                                  |       |       |       |       |
| gi 311274560 ref XP_003134377.1   | PREDICTED: vacuolar protein sorting-associated protein 16 homolog isoform 2 [Sus scrofa]                                                                                                                                                                  |       |       |       |       |
| gi 297632389 ref NP_001172080.1   | mitochondrial ribosomal protein L52 [Sus scrofa]                                                                                                                                                                                                          | 0.14  | 0.446 | 0.448 | 0.294 |
| gi 347658999 ref NP_001231625.1   | uncharacterized protein LOC100512671 [Sus scrofa]                                                                                                                                                                                                         | 0.634 | 1.694 | 2.208 | 1.089 |
| gi 350588410 ref XP_003482644.1   | PREDICTED: ester hydrolase C11orf54 homolog [Sus scrofa]                                                                                                                                                                                                  |       |       |       |       |
| gi 350582160 ref XP_003124976.3   | PREDICTED: threonine synthase-like 2-like [Sus scrofa]                                                                                                                                                                                                    | ---   | ---   | ---   | ---   |
| gi 148234110 ref NP_001087        | selenide, water dikinase 2 [Sus                                                                                                                                                                                                                           | ---   | ---   | ---   | ---   |

|                                      |                                                                                                                                                                                                                                                                           |       |       |       |       |
|--------------------------------------|---------------------------------------------------------------------------------------------------------------------------------------------------------------------------------------------------------------------------------------------------------------------------|-------|-------|-------|-------|
| 204.1                                | scrofa] >gi 171769747 sp A1YIZ1.2 S<br>PS2_PIG RecName: Full=Selenide,<br>water dikinase 2; AltName:<br>Full=Selenium donor protein 2;<br>AltName: Full=Selenophosphate<br>synthase<br>2 >gi 120988510 gb ABM46855.1 <br>selenophosphate synthe                           |       |       |       |       |
| gi 343432623 ref NP_001230<br>325.1  | bolA-like protein 1 [Sus scrofa]                                                                                                                                                                                                                                          | 1.648 | 1.679 | 1.528 | 1.58  |
| gi 335284508 ref XP_003124<br>605.2  | PREDICTED: mu-crystallin homolog<br>[Sus scrofa]                                                                                                                                                                                                                          | ---   | ---   | ---   | ---   |
| gi 178057067 ref NP_001116<br>568.1  | hsp90 co-chaperone Cdc37 [Sus<br>scrofa] >gi 51870491 emb CAG15149<br>.1  CDC37 cell division cycle 37<br>protein [Sus scrofa]                                                                                                                                            | 0.935 | 0.666 | 0.807 | 0.831 |
| gi 297591959 ref NP_001172<br>060.1  | farnesyl pyrophosphate synthase<br>precursor [Sus<br>scrofa] >gi 262072800 dbj BAI47708.<br>1  farnesyl diphosphate synthase [Sus<br>scrofa]                                                                                                                              | ---   | ---   | ---   | ---   |
| gi 2498644 sp Q29075.1 NKL<br>_PIG   | RecName: Full=Antimicrobial<br>peptide NK-lysin; Short=NKL; Flags:<br>Precursor >gi 736317 emb CAA5972<br>0.1  NK-lysin [Sus scrofa]                                                                                                                                      | ---   | ---   | ---   | ---   |
| gi 311252221 ref XP_003124<br>987.1  | PREDICTED: antimicrobial peptide<br>NK-lysin [Sus scrofa]                                                                                                                                                                                                                 |       |       |       |       |
| gi 1352666 sp P11493.2 PP2<br>AB_PIG | RecName:<br>Full=Serine/threonine-protein<br>phosphatase 2A catalytic subunit beta<br>isoform;<br>Short=PP2A-beta >gi 164298 gb AA<br>A30982.1  protein phosphatase 2A<br>beta subunit, partial [Sus scrofa]                                                              | 2.065 | 1.224 | 0.936 | 1.719 |
| gi 47523790 ref NP_999531.1<br>      | serine/threonine-protein phosphatase<br>2A catalytic subunit alpha isoform<br>[Sus<br>scrofa] >gi 54038797 sp P67776.1 PP<br>2AA_PIG RecName:<br>Full=Serine/threonine-protein<br>phosphatase 2A catalytic subunit<br>alpha isoform;<br>Short=PP2A-alpha >gi 164296 gb AA |       |       |       |       |

|                                 |                                                                                                                                                                                                                                                           |       |       |       |       |
|---------------------------------|-----------------------------------------------------------------------------------------------------------------------------------------------------------------------------------------------------------------------------------------------------------|-------|-------|-------|-------|
|                                 | A30981.1                                                                                                                                                                                                                                                  |       |       |       |       |
| gi 311272409 ref XP_003133430.1 | PREDICTED:<br>serine/threonine-protein phosphatase 2A catalytic subunit alpha isoform [Sus scrofa]                                                                                                                                                        |       |       |       |       |
| gi 194034423 ref XP_001926853.1 | PREDICTED: 1-2-hydroxyglutarate dehydrogenase, mitochondrial [Sus scrofa]                                                                                                                                                                                 | 0.722 | 0.257 | 0.397 | 0.518 |
| gi 347658980 ref NP_001231616.1 | ribosomal protein L36 [Sus scrofa] >gi 350580660 ref XP_003480870.1  PREDICTED: 60S ribosomal protein L36 isoform 3 [Sus scrofa] >gi 350580656 ref XP_003480868.1  PREDICTED: 60S ribosomal protein L36 isoform 1 [Sus scrofa] >gi 350580658 ref XP_00348 | 0.476 | 0.379 | 0.238 | 0.385 |
| gi 350581899 ref XP_003124791.3 | PREDICTED: LOW QUALITY PROTEIN: putative N-acetylglucosamine-6-phosphate deacetylase-like [Sus scrofa]                                                                                                                                                    | ---   | ---   | ---   | ---   |
| gi 60097959 ref NP_001012408.1  | dystrophin [Sus scrofa] >gi 75052798 sp Q5GN48.1 DMD_PIG RecName: Full=Dystrophin >gi 58416122 emb CAI26302.1  dystrophin [Sus scrofa]                                                                                                                    | 1.086 | 0.933 | 1.591 | 0.858 |
| gi 325652134 ref NP_001191701.1 | bromodomain-containing protein 4 [Sus scrofa] >gi 321172828 gb ADW77216.1  bromodomain-containing protein 4 [Sus scrofa]                                                                                                                                  | 0.575 | 1.145 | 0.883 | 0.932 |
| gi 347300394 ref NP_001231489.1 | vesicle-fusing ATPase [Sus scrofa]                                                                                                                                                                                                                        | 0.525 | 0.58  | 0.503 | 0.645 |
| gi 350596345 ref XP_003484261.1 | PREDICTED: vesicle-fusing ATPase-like [Sus scrofa]                                                                                                                                                                                                        |       |       |       |       |
| gi 350594565 ref XP_003134235.3 | PREDICTED: acid ceramidase-like [Sus scrofa]                                                                                                                                                                                                              | 0.498 | 1.252 | 1.005 | 0.73  |
| gi 160420271 ref NP_001038047.1 | zinc finger Ran-binding domain-containing protein 2 [Sus scrofa] >gi 118578026 sp Q19QU3.1 ZRAB2_PIG RecName: Full=Zinc finger Ran-binding domain-containing protein 2; AltName: Full=Zinc finger protein                                                 | 0.664 | 1.344 | 0.97  | 0.958 |

|                                    |                                                                                                                                                                       |       |       |       |       |
|------------------------------------|-----------------------------------------------------------------------------------------------------------------------------------------------------------------------|-------|-------|-------|-------|
|                                    | 265 >gi 104295127 gb ABF72033.1  zinc finger pr                                                                                                                       |       |       |       |       |
| gi 335306763 ref XP_003360560.1    | PREDICTED: ubiquitin-like protein 4A-like isoform 1 [Sus scrofa]                                                                                                      | 0.8   | 0.778 | 0.894 | 0.843 |
| gi 335306765 ref XP_003360561.1    | PREDICTED: ubiquitin-like protein 4A-like isoform 2 [Sus scrofa]                                                                                                      |       |       |       |       |
| gi 311255898 ref XP_003126418.1    | PREDICTED: LOW QUALITY PROTEIN: nuclear pore complex protein Nup107-like [Sus scrofa]                                                                                 | ---   | ---   | ---   | ---   |
| gi 335310331 ref XP_003361983.1    | PREDICTED: poly(U)-binding-splicing factor PUF60-like [Sus scrofa]                                                                                                    | 1.293 | 1.065 | 0.792 | 1.76  |
| gi 178056703 ref NP_001116542.1    | angiotensin-converting enzyme 2 precursor [Sus scrofa] >gi 170066580 gb ACB06678.1  angiotensin converting enzyme 2 [Sus scrofa]                                      | 0.613 | 0.88  | 0.945 | 0.81  |
| gi 254546340 gb ACT66265.1         | angiotensin I converting enzyme 2 [Sus scrofa domesticus]                                                                                                             |       |       |       |       |
| gi 335310935 ref XP_003362258.1    | PREDICTED: NADH dehydrogenase [ubiquinone] 1 beta subcomplex subunit 10-like [Sus scrofa]                                                                             | 0.74  | 0.563 | 0.475 | 0.74  |
| gi 346644697 ref NP_001231015.1    | eukaryotic translation initiation factor 3 subunit L [Sus scrofa]                                                                                                     | 2.308 | 1.055 | 1.577 | 1.845 |
| gi 194041975 ref XP_001929465.1    | PREDICTED: STE20-like kinase isoform 2 [Sus scrofa]                                                                                                                   | ---   | ---   | ---   | ---   |
| gi 346227222 ref NP_001230997.1    | ribosomal protein L13a isoform 1 [Sus scrofa]                                                                                                                         | 0.802 | 0.636 | 0.5   | 0.943 |
| gi 346227224 ref NP_001230998.1    | ribosomal protein L13a isoform 2 [Sus scrofa]                                                                                                                         |       |       |       |       |
| gi 58618083 gb AAW80612.1          | P2X7 receptor [Sus scrofa]                                                                                                                                            | 0.605 | 0.439 | 0.663 | 0.308 |
| gi 311270616 ref XP_001926839.2    | PREDICTED: P2X purinoceptor 7 [Sus scrofa]                                                                                                                            |       |       |       |       |
| gi 58826311 gb AAW82880.1          | P2X7 purinergic receptor [Sus scrofa]                                                                                                                                 |       |       |       |       |
| gi 122064241 sp Q06AT0.3 HPCL1_PIG | RecName: Full=Hippocalcin-like protein<br>1 >gi 178056468 ref NP_001116598.1  hippocalcin-like protein 1 [Sus scrofa] >gi 115394792 gb ABI97190.1  HPCL1 [Sus scrofa] | 1.122 | 1.907 | 2.156 | 1.642 |

|                                    |                                                                                                                                                                                                                                                          |       |       |       |       |
|------------------------------------|----------------------------------------------------------------------------------------------------------------------------------------------------------------------------------------------------------------------------------------------------------|-------|-------|-------|-------|
| gi 343478230 ref NP_001230382.1    | enhancer of yellow 2 transcription factor homolog isoform 1 [Sus scrofa] >gi 350582977 ref XP_003481405.1  PREDICTED: enhancer of yellow 2 transcription factor homolog isoform 1 [Sus scrofa]                                                           | ---   | ---   | ---   | ---   |
| gi 343478234 ref NP_001230383.1    | enhancer of yellow 2 transcription factor homolog isoform 2 [Sus scrofa] >gi 350582979 ref XP_003481406.1  PREDICTED: enhancer of yellow 2 transcription factor homolog isoform 2 [Sus scrofa]                                                           |       |       |       |       |
| gi 585657 sp P37109.1 ISK4_PIG     | RecName: Full=Serine protease inhibitor Kazal-type 4; AltName: Full=Peptide PEC-60; Flags: Precursor >gi 47523134 ref NP_999029.1  serine protease inhibitor Kazal-type 4 precursor [Sus scrofa] >gi 5705936 gb AAB23691.2  PEC-60 [Sus scrofa] >gi 2034 | ---   | ---   | ---   | ---   |
| gi 159162822 pdb 1PCE A            | Chain A, Solution Structure And Dynamics Of Pec-60, A Protein Of The Kazal Type Inhibitor Family, Determined By Nuclear Magnetic Resonance Spectroscopy                                                                                                  |       |       |       |       |
| gi 350595064 ref XP_003134565.3    | PREDICTED: dnaJ homolog subfamily B member 6-like [Sus scrofa]                                                                                                                                                                                           | 1.018 | 1.082 | 1.298 | 1.144 |
| gi 54039304 sp P62279.2 RS13_PIG   | RecName: Full=40S ribosomal protein S13                                                                                                                                                                                                                  | 0.681 | 0.401 | 0.457 | 0.918 |
| gi 348605266 ref NP_001231758.1    | ribosomal protein S13 [Sus scrofa]                                                                                                                                                                                                                       |       |       |       |       |
| gi 164525 gb AAA31059.1            | lactoferrin [Sus scrofa]                                                                                                                                                                                                                                 | ---   | 1.107 | ---   | 0.8   |
| gi 17467354 gb AAL40161.1 L77887_1 | lactoferrin, partial [Sus scrofa]                                                                                                                                                                                                                        |       |       |       |       |
| gi 3915882 sp P14632.3 TRFL_PIG    | RecName: Full=Lactotransferrin; Short=Lactoferrin; Flags: Precursor                                                                                                                                                                                      |       |       |       |       |
| gi 47523782 ref NP_999527.1        | lactotransferrin precursor [Sus scrofa] >gi 164614 gb AAA31102.1  lactoferrin [Sus scrofa]                                                                                                                                                               |       |       |       |       |
| gi 116488296 gb ABJ98718.1         | lactoferrin [Sus scrofa]                                                                                                                                                                                                                                 |       |       |       |       |
| gi 41688298 dbj BAD08651.1         | lactotransferrin [Sus scrofa]                                                                                                                                                                                                                            |       |       |       |       |



|                                       |                                                                                                                                                                                                                                                                                   |      |       |       |       |
|---------------------------------------|-----------------------------------------------------------------------------------------------------------------------------------------------------------------------------------------------------------------------------------------------------------------------------------|------|-------|-------|-------|
|                                       |                                                                                                                                                                                                                                                                                   |      |       |       |       |
| gi 32130549 gb AAP70487.1             | lactoferrin [Sus scrofa]                                                                                                                                                                                                                                                          |      |       |       |       |
| gi 194043274 ref XP_001927288.1       | PREDICTED:<br>developmentally-regulated<br>GTP-binding protein 1 isoform 1 [Sus scrofa]                                                                                                                                                                                           | ---  | ---   | ---   | ---   |
| gi 311257796 ref XP_003127291.1       | PREDICTED: SUMO-activating<br>enzyme subunit 1-like isoform 1 [Sus scrofa]                                                                                                                                                                                                        | ---  | ---   | ---   | ---   |
| gi 335289862 ref XP_003356004.1       | PREDICTED: SUMO-activating<br>enzyme subunit 1-like isoform 2 [Sus scrofa]                                                                                                                                                                                                        |      |       |       |       |
| gi 2258465 gb AAB94003.1              | succinyl-CoA synthetase alpha<br>subunit [Sus scrofa]                                                                                                                                                                                                                             | 0.61 | 0.582 | 0.448 | 0.616 |
| gi 12621910 gb AAB94002.2             | succinyl-CoA synthetase [Sus scrofa]                                                                                                                                                                                                                                              |      |       |       |       |
| gi 9955019 pdb 1EUC A                 | Chain A, Crystal Structure Of<br>Dephosphorylated Pig Heart, Gtp-<br>Specific Succinyl-Coa Synthetase                                                                                                                                                                             |      |       |       |       |
| gi 90109582 pdb 2FPP A                | Chain A, Crystal Structure Of Pig<br>Gtp-Specific Succinyl-Coa<br>Synthetase From Polyethylene Glycol<br>With Chloride<br>Ions >gi 90109574 pdb 2FPI A Chain<br>A, Crystal Structure Of Pig<br>Gtp-Specific Succinyl-Coa<br>Synthetase From Polyethylene<br>Glycol >gi 90109554 p |      |       |       |       |
| gi 90109572 pdb 2FPG A                | Chain A, Crystal Structure Of Pig<br>Gtp-Specific Succinyl-Coa<br>Synthetase In Complex With Gdp                                                                                                                                                                                  |      |       |       |       |
| gi 223634702 sp O19069.2 S<br>UCA_PIG | RecName: Full=Succinyl-CoA ligase<br>[ADP/GDP-forming] subunit alpha,<br>mitochondrial; AltName:<br>Full=Succinyl-CoA synthetase<br>subunit alpha; Short=SCS-alpha;<br>Flags: Precursor                                                                                           |      |       |       |       |
| gi 9955021 pdb 1EUD A                 | Chain A, Crystal Structure Of<br>Phosphorylated Pig Heart,<br>Gtp-Specific Succinyl-Coa<br>Synthetase                                                                                                                                                                             |      |       |       |       |
| gi 311263942 ref XP_003129926.1       | PREDICTED: oligoribonuclease,<br>mitochondrial-like [Sus scrofa]                                                                                                                                                                                                                  | ---  | ---   | ---   | ---   |

|                                      |                                                                                                                                                                                                                                                            |       |       |       |       |
|--------------------------------------|------------------------------------------------------------------------------------------------------------------------------------------------------------------------------------------------------------------------------------------------------------|-------|-------|-------|-------|
| gi 194035009 ref XP_001925846.1      | PREDICTED: ras-related protein Rab-27B-like [Sus scrofa]                                                                                                                                                                                                   | 0.921 | 0.767 | 0.639 | 0.911 |
| gi 17933431 gb AAL48289.1 AF452448_1 | beta-2-microglobulin protein [Sus scrofa]                                                                                                                                                                                                                  | 0.551 | 1.527 | 1.177 | 1.363 |
| gi 47522782 ref NP_999143.1          | beta-2-microglobulin precursor [Sus scrofa] >gi 1168611 sp Q07717.1 B2 MG_PIG RecName: Full=Beta-2-microglobulin; AltName: Full=Lactollin; Flags: Precursor >gi 350578710 ref XP_003480435.1  PREDICTED: beta-2-microglobulin-like [Sus scrofa] >gi 350578 |       |       |       |       |
| gi 365813031 pdb 3QQ3 E              | Chain E, Crystal Structure Of Swine Major Histocompatibility Complex Class I Sla-1 0401 And Identification Of 2009 Pandemic Swine-Origin Influenza A H1n1 Virus Cytotoxic T Lymphocyte Epitope Peptides >gi 365813034 pdb 3QQ4 B Chain B, Crystal Structu  |       |       |       |       |
| gi 77176666 gb ABA64451.1            | beta-2-microglobulin protein, partial [Sus scrofa]                                                                                                                                                                                                         |       |       |       |       |
| gi 350578712 ref XP_003480436.1      | PREDICTED: beta-2-microglobulin-like [Sus scrofa]                                                                                                                                                                                                          |       |       |       |       |
| gi 311248023 ref XP_003122934.1      | PREDICTED: eukaryotic translation initiation factor 3 subunit M [Sus scrofa]                                                                                                                                                                               | 1.029 | 0.97  | 1.863 | 1.341 |
| gi 346986292 ref NP_001231303.1      | uncharacterized protein LOC100155717 isoform 1 [Sus scrofa] >gi 346986290 ref NP_001231302.1  uncharacterized protein LOC100155717 isoform 1 [Sus scrofa]                                                                                                  | 1.313 | 0.813 | 0.747 | 0.706 |
| gi 346986294 ref NP_001231304.1      | uncharacterized protein LOC100155717 isoform 2 [Sus scrofa]                                                                                                                                                                                                |       |       |       |       |
| gi 350589017 ref XP_003482769.1      | PREDICTED: 28S ribosomal protein S14, mitochondrial-like [Sus scrofa]                                                                                                                                                                                      | ---   | ---   | ---   | ---   |
| gi 45268975 gb AAS55900.1            | 60S ribosomal protein L11, partial [Sus scrofa]                                                                                                                                                                                                            | 2.079 | 1.202 | 2.07  | 1.478 |
| gi 51704216 sp Q29205.3 RL           | RecName: Full=60S ribosomal                                                                                                                                                                                                                                |       |       |       |       |

|                                 |                                                                                                                                                                                                                                                           |       |       |       |       |
|---------------------------------|-----------------------------------------------------------------------------------------------------------------------------------------------------------------------------------------------------------------------------------------------------------|-------|-------|-------|-------|
| 11_PIG                          | protein<br>L11 >gi 48675939 ref NP_001001638.1  60S ribosomal protein L11 [Sus scrofa] >gi 45239006 gb AAS55632.1  ribosomal protein L11 [Sus scrofa]                                                                                                     |       |       |       |       |
| gi 433126 gb AAA52218.1         | Ig gamma 2b chain constant region, partial [Sus scrofa] >gi 2136514 pir  I47160 Ig gamma 2b chain constant region - pig (fragment)                                                                                                                        | ---   | ---   | ---   | ---   |
| gi 350591483 ref XP_003358588.2 | PREDICTED: acyl-CoA dehydrogenase family member 9, mitochondrial-like [Sus scrofa]                                                                                                                                                                        | ---   | ---   | ---   | ---   |
| gi 311253264 ref XP_001925395.2 | PREDICTED: zinc transporter ZIP4-like [Sus scrofa]                                                                                                                                                                                                        | ---   | ---   | ---   | ---   |
| gi 311260258 ref XP_003128394.1 | PREDICTED: LEM domain-containing protein 2 [Sus scrofa]                                                                                                                                                                                                   | ---   | ---   | ---   | ---   |
| gi 335288032 ref XP_001929448.3 | PREDICTED: prostaglandin E synthase 3 isoform 1 [Sus scrofa]                                                                                                                                                                                              | ---   | ---   | ---   | ---   |
| gi 335288038 ref XP_003355506.1 | PREDICTED: prostaglandin E synthase 3 isoform 4 [Sus scrofa]                                                                                                                                                                                              |       |       |       |       |
| gi 335288034 ref XP_003355504.1 | PREDICTED: prostaglandin E synthase 3 isoform 2 [Sus scrofa]                                                                                                                                                                                              |       |       |       |       |
| gi 47522718 ref NP_999109.1     | dolichyl-diphosphooligosaccharide--protein glycosyltransferase subunit DAD1 [Sus scrofa] >gi 3023621 sp Q29036.3 DAD1_PIG RecName: Full=Dolichyl-diphosphooligosaccharide--protein glycosyltransferase subunit DAD1; Short=Oligosaccharyl transferase sub | 0.875 | 0.615 | 0.56  | 0.973 |
| gi 350585844 ref XP_003356353.2 | PREDICTED: histone deacetylase 1-like, partial [Sus scrofa]                                                                                                                                                                                               | ---   | ---   | ---   | ---   |
| gi 350585862 ref XP_003127820.3 | PREDICTED: histone deacetylase 1-like [Sus scrofa]                                                                                                                                                                                                        |       |       |       |       |
| gi 311247551 ref XP_003122699.1 | PREDICTED: DNA damage-binding protein 1-like isoform 1 [Sus scrofa]                                                                                                                                                                                       | 1.254 | 0.422 | 0.742 | 0.802 |
| gi 335281341 ref XP_003122446.2 | PREDICTED: mitochondrial glutamate carrier 1-like [Sus scrofa]                                                                                                                                                                                            | ---   | ---   | ---   | ---   |
| gi 194042439 ref XP_001928      | PREDICTED: ATPase family AAA                                                                                                                                                                                                                              | 0.481 | 1.189 | 1.064 | 0.8   |

|                                   |                                                                                                                                                                                                                                                          |       |       |       |       |
|-----------------------------------|----------------------------------------------------------------------------------------------------------------------------------------------------------------------------------------------------------------------------------------------------------|-------|-------|-------|-------|
| 012.1                             | domain-containing protein 1 isoform 1 [Sus scrofa]                                                                                                                                                                                                       |       |       |       |       |
| gi 335301975 ref XP_003359338.1   | PREDICTED: ATPase family AAA domain-containing protein 1 isoform 2 [Sus scrofa]                                                                                                                                                                          |       |       |       |       |
| gi 194033654 ref XP_001928369.1   | PREDICTED: ubiquinone biosynthesis protein COQ4 homolog, mitochondrial [Sus scrofa]                                                                                                                                                                      | ---   | ---   | ---   | ---   |
| gi 47117721 sp P83884.2 RL36A_PIG | RecName: Full=60S ribosomal protein L36a; AltName: Full=60S ribosomal protein L44 >gi 47522650 ref NP_999082.1 60S ribosomal protein L36a [Sus scrofa] >gi 335303998 ref XP_003134062.2  PREDICTED: 60S ribosomal protein L36a-like [Sus scrofa] >gi 335 | 1.132 | 0.672 | 0.743 | 1.439 |
| gi 194035409 ref XP_001926511.1   | PREDICTED: syntaxin-7 [Sus scrofa]                                                                                                                                                                                                                       | 0.461 | 0.897 | 0.68  | 0.715 |
| gi 365796119 dbj BAL43002.1       | toll-interacting protein [Sus scrofa]                                                                                                                                                                                                                    | 0.769 | 1.115 | 1.202 | 0.594 |
| gi 194033405 ref XP_001928380.1   | PREDICTED: acetyl-CoA acetyltransferase, cytosolic [Sus scrofa]                                                                                                                                                                                          | 0.884 | 0.927 | 0.657 | 0.802 |
| gi 311248940 ref XP_003123387.1   | PREDICTED: growth arrest and DNA damage-inducible proteins-interacting protein 1-like [Sus scrofa]                                                                                                                                                       | 0.625 | 1.146 | 1.178 | 0.724 |
| gi 335289143 ref XP_003126912.2   | PREDICTED: probable D-lactate dehydrogenase, mitochondrial [Sus scrofa]                                                                                                                                                                                  | 1.998 | 1.083 | 2.112 | 1.394 |
| gi 311246098 ref XP_003122082.1   | PREDICTED: coronin-2A-like [Sus scrofa]                                                                                                                                                                                                                  | 0.864 | 0.93  | 0.766 | 1.106 |
| gi 178056567 ref NP_001116632.1   | prefoldin subunit 4 [Sus scrofa] >gi 147225098 emb CAN13185.1  prefoldin 4 [Sus scrofa]                                                                                                                                                                  | 1.299 | 2.181 | 1.298 | 1.388 |
| gi 148232463 ref NP_001090940.1   | methylmalonyl-CoA epimerase, mitochondrial [Sus scrofa] >gi 117660706 gb ABK55633.1  MCEE [Sus scrofa]                                                                                                                                                   | ---   | ---   | ---   | ---   |
| gi 359807141 ref NP_001240850.1   | mannose-6-phosphate isomerase [Sus scrofa]                                                                                                                                                                                                               | ---   | ---   | ---   | ---   |
| gi 350536495 ref NP_001233        | probable ATP-dependent RNA                                                                                                                                                                                                                               | 1.051 | 1.216 | 1.219 | 1.395 |

|                                 |                                                                                                                                                                                     |       |       |       |       |
|---------------------------------|-------------------------------------------------------------------------------------------------------------------------------------------------------------------------------------|-------|-------|-------|-------|
| 197.1                           | helicase DDX46 [Sus scrofa] >gi 336092215 gb AEI00731.1  DEAD box polypeptide 46 [Sus scrofa]                                                                                       |       |       |       |       |
| gi 298228972 ref NP_001177201.1 | autophagy-related protein 16-1 isoform 1 [Sus scrofa] >gi 296874478 gb ADH81744.1  autophagy related 16-like protein 1 transcript variant 1 [Sus scrofa]                            | ---   | ---   | ---   | ---   |
| gi 298231102 ref NP_001177202.1 | autophagy-related protein 16-1 isoform 2 [Sus scrofa] >gi 296874480 gb ADH81745.1  autophagy related 16-like protein 1 transcript variant 2 [Sus scrofa]                            |       |       |       |       |
| gi 343403779 ref NP_001230274.1 | ribosomal protein L13 [Sus scrofa]                                                                                                                                                  | 1.041 | 0.385 | 0.387 | 1.096 |
| gi 335298292 ref XP_003358241.1 | PREDICTED: phosphatidylinositol transfer protein alpha isoform-like [Sus scrofa]                                                                                                    | ---   | ---   | ---   | ---   |
| gi 350579520 ref XP_003353667.2 | PREDICTED: U4/U6 small nuclear ribonucleoprotein Prp4-like [Sus scrofa]                                                                                                             | 1.08  | 0.968 | 1.519 | 0.658 |
| gi 350582982 ref XP_003481407.1 | PREDICTED: tetratricopeptide repeat protein 35-like [Sus scrofa]                                                                                                                    | ---   | ---   | ---   | ---   |
| gi 311252708 ref XP_003125227.1 | PREDICTED: LOW QUALITY PROTEIN: protein phosphatase 1B-like [Sus scrofa]                                                                                                            | 1.755 | 0.953 | 0.884 | 0.89  |
| gi 343790912 ref NP_001230514.1 | ras-related C3 botulinum toxin substrate 1 (rho family, small GTP binding protein Rac1) [Sus scrofa]                                                                                | ---   | ---   | ---   | ---   |
| gi 213021237 ref NP_001132943.1 | DNA-(apurinic or apyrimidinic site) lyase [Sus scrofa] >gi 210062866 gb ACJ06403.1  APEX nuclease 1 [Sus scrofa]                                                                    | 1.59  | 0.705 | 0.937 | 0.827 |
| gi 47523060 ref NP_999293.1     | serine/threonine-protein phosphatase 2B catalytic subunit alpha isoform [Sus scrofa] >gi 14209665 gb AAK56844.1 AF193515_1 calcineurin catalytic subunit delta isoform [Sus scrofa] | ---   | ---   | ---   | ---   |
| gi 311250082 ref XP_003123949.1 | PREDICTED: isochorismatase domain-containing protein 1-like [Sus scrofa]                                                                                                            | 0.95  | 0.901 | 1.01  | 0.792 |

|                                 |                                                                                                                                                  |       |       |       |       |
|---------------------------------|--------------------------------------------------------------------------------------------------------------------------------------------------|-------|-------|-------|-------|
| gi 350529419 ref NP_001231941.1 | inositol polyphosphate-1-phosphatase [Sus scrofa]                                                                                                | ---   | ---   | ---   | ---   |
| gi 350593719 ref XP_003483752.1 | PREDICTED: inositol polyphosphate 1-phosphatase-like, partial [Sus scrofa]                                                                       |       |       |       |       |
| gi 347543777 ref NP_001231552.1 | protein LYRIC [Sus scrofa]                                                                                                                       | 0.777 | 1.226 | 1.046 | 1.089 |
| gi 350590001 ref XP_003357925.2 | PREDICTED: multidrug resistance-associated protein 4-like, partial [Sus scrofa]                                                                  | 0.814 | 0.461 | 0.545 | 0.631 |
| gi 350580632 ref XP_003123159.3 | PREDICTED: general transcription factor IIF subunit 1-like [Sus scrofa]                                                                          | ---   | ---   | ---   | ---   |
| gi 350585533 ref XP_003356179.2 | PREDICTED: leucine-rich repeat-containing protein 47-like [Sus scrofa]                                                                           | ---   | 0.923 | 1.23  | 0.852 |
| gi 335290197 ref XP_003356098.1 | PREDICTED: LOW QUALITY PROTEIN: 40S ribosomal protein S9-like, partial [Sus scrofa]                                                              | 0.594 | 0.672 | 0.735 | 0.801 |
| gi 311273092 ref XP_001925601.2 | PREDICTED: protein FAM134A [Sus scrofa]                                                                                                          | ---   | ---   | ---   | ---   |
| gi 335293289 ref XP_003356924.1 | PREDICTED: O-phosphoseryl-tRNA(Sec) selenium transferase-like [Sus scrofa]                                                                       | ---   | ---   | ---   | ---   |
| gi 350596387 ref XP_003361109.2 | PREDICTED: O-phosphoseryl-tRNA(Sec) selenium transferase-like [Sus scrofa]                                                                       |       |       |       |       |
| gi 47523704 ref NP_999484.1     | double stranded RNA-dependent protein kinase [Sus scrofa] >gi 29292936 dbj BAC66439.1  double stranded RNA-dependent protein kinase [Sus scrofa] | 0.76  | 1.035 | 1.042 | 1.077 |
| gi 311252821 ref XP_003125284.1 | PREDICTED: interferon-induced, double-stranded RNA-activated protein kinase-like [Sus scrofa]                                                    |       |       |       |       |
| gi 219521982 ref NP_001137178.1 | erlin-2 precursor [Sus scrofa] >gi 217314887 gb ACK36978.1  ER lipid raft-associated 2 isoform 2 [Sus scrofa]                                    | ---   | ---   | ---   | ---   |
| gi 239504580 ref NP_001155120.1 | selenoprotein M precursor [Sus scrofa] >gi 237930353 gb ACR33808.1  selenoprotein M [Sus scrofa]                                                 | ---   | ---   | ---   | ---   |
| gi 311257625 ref XP_003127      | PREDICTED: platelet-activating                                                                                                                   | ---   | ---   | ---   | ---   |

|                                      |                                                                                                                                                                                                                                                              |       |       |       |       |
|--------------------------------------|--------------------------------------------------------------------------------------------------------------------------------------------------------------------------------------------------------------------------------------------------------------|-------|-------|-------|-------|
| 213.1                                | factor acetylhydrolase IB subunit gamma-like [Sus scrofa] >gi 311257641 ref XP_003127220.1  PREDICTED: platelet-activating factor acetylhydrolase IB subunit gamma-like [Sus scrofa]                                                                         |       |       |       |       |
| gi 350592333 ref XP_003359097.2      | PREDICTED: mitochondrial peptide methionine sulfoxide reductase [Sus scrofa]                                                                                                                                                                                 | ---   | ---   | ---   | ---   |
| gi 335295539 ref XP_003130253.2      | PREDICTED: multidrug resistance protein 1 isoform 2 [Sus scrofa]                                                                                                                                                                                             | ---   | ---   | ---   | ---   |
| gi 350588870 ref XP_003130261.3      | PREDICTED: multidrug resistance protein 1-like, partial [Sus scrofa]                                                                                                                                                                                         |       |       |       |       |
| gi 350582950 ref XP_003481396.1      | PREDICTED: double-strand-break repair protein rad21 homolog [Sus scrofa]                                                                                                                                                                                     | 0.699 | 0.672 | 1.136 | 0.806 |
| gi 350597023 ref XP_003361918.2      | PREDICTED: double-strand-break repair protein rad21 homolog [Sus scrofa]                                                                                                                                                                                     |       |       |       |       |
| gi 93359412 gb ABF13285.1            | proliferating cell nuclear antigen [Sus scrofa]                                                                                                                                                                                                              | ---   | ---   | ---   | ---   |
| gi 335304393 ref XP_003359931.1      | PREDICTED: proliferating cell nuclear antigen [Sus scrofa]                                                                                                                                                                                                   |       |       |       |       |
| gi 60389430 sp Q8MIZ3.1 D<br>CPS_PIG | RecName: Full=m7GpppX diphosphatase; AltName: Full=DCS-1; AltName: Full=Hint-related 7meGMP-directed hydrolase; AltName: Full=Histidine triad protein member 5; Short=HINT-5; AltName: Full=Scavenger mRNA-decapping enzyme<br>DcpS >gi 47523260 ref NP_9989 | ---   | ---   | ---   | ---   |
| gi 194042142 ref XP_001929035.1      | PREDICTED: BAG family molecular chaperone regulator 3 [Sus scrofa]                                                                                                                                                                                           | 0.803 | 0.732 | 0.843 | 0.588 |
| gi 326632513 gb ADZ99177.1           | BCL2-associated athanogene 3, partial [Sus scrofa]                                                                                                                                                                                                           |       |       |       |       |
| gi 335282832 ref XP_003354166.1      | PREDICTED: protein Wiz isoform 2 [Sus scrofa]                                                                                                                                                                                                                | ---   | ---   | ---   | ---   |
| gi 335282838 ref XP_003354168.1      | PREDICTED: protein Wiz isoform 4 [Sus scrofa]                                                                                                                                                                                                                |       |       |       |       |

|                                  |                                                                                                                                                                                                       |       |       |       |       |
|----------------------------------|-------------------------------------------------------------------------------------------------------------------------------------------------------------------------------------------------------|-------|-------|-------|-------|
| gi 335282836 ref XP_003123504.2  | PREDICTED: protein Wiz isoform 1 [Sus scrofa]                                                                                                                                                         |       |       |       |       |
| gi 335282840 ref XP_003354169.1  | PREDICTED: protein Wiz isoform 5 [Sus scrofa]                                                                                                                                                         |       |       |       |       |
| gi 350595384 ref XP_003134854.3  | PREDICTED: glycyl-tRNA synthetase-like [Sus scrofa]                                                                                                                                                   | ---   | ---   | ---   | ---   |
| gi 350585317 ref XP_003127269.3  | PREDICTED: poliovirus receptor-like [Sus scrofa]                                                                                                                                                      | ---   | ---   | ---   | ---   |
| gi 349732213 ref NP_001231857.1  | LSM3 homolog, U6 small nuclear RNA associated [Sus scrofa]                                                                                                                                            | 1.066 | 1.554 | 1.348 | 1.109 |
| gi 350582471 ref XP_003125244.3  | PREDICTED: echinoderm microtubule associated protein like 4 [Sus scrofa]                                                                                                                              | 0.952 | 1.303 | 1.407 | 1.152 |
| gi 350593526 ref XP_003359584.2  | PREDICTED: 26S proteasome non-ATPase regulatory subunit 14 [Sus scrofa]                                                                                                                               | ---   | ---   | ---   | ---   |
| gi 51338616 sp P62831.1 RL23_PIG | RecName: Full=60S ribosomal protein L23; AltName: Full=Ribosomal protein L17 >gi 194018720 ref NP_001123427.1  60S ribosomal protein L23 [Sus scrofa] >gi 117661026 gb ABK55650.1  RPL23 [Sus scrofa] | 0.6   | 0.498 | 0.522 | 0.903 |
| gi 350589072 ref XP_003357606.2  | PREDICTED: sulfhydryl oxidase 1-like isoform 1 [Sus scrofa]                                                                                                                                           | ---   | ---   | ---   | ---   |
| gi 350589074 ref XP_003357607.2  | PREDICTED: sulfhydryl oxidase 1-like isoform 2 [Sus scrofa]                                                                                                                                           |       |       |       |       |
| gi 335304552 ref XP_001927148.2  | PREDICTED: acetyl-coenzyme A synthetase 2-like, mitochondrial-like [Sus scrofa]                                                                                                                       | 1.29  | 0.748 | 0.638 | 1.105 |
| gi 285818412 gb ADC38879.1       | periostin, osteoblast specific factor [Sus scrofa]                                                                                                                                                    | 0.836 | 1.196 |       | 1.034 |
| gi 329744611 ref NP_001193280.1  | periostin, osteoblast specific factor isoform 2 precursor [Sus scrofa]                                                                                                                                |       |       |       |       |
| gi 329744601 ref NP_001193276.1  | periostin, osteoblast specific factor isoform 1 precursor [Sus scrofa]                                                                                                                                |       |       |       |       |
| gi 350579947 ref XP_003122565.3  | PREDICTED: U4/U6.U5 tri-snRNP-associated protein 1 [Sus scrofa]                                                                                                                                       | ---   | ---   | ---   | ---   |
| gi 194037097 ref XP_001927840.1  | PREDICTED: carbonic anhydrase 2 [Sus scrofa]                                                                                                                                                          | 0.798 | 1.38  | 1.495 | 0.798 |
| gi 350582678 ref XP_003354       | PREDICTED: HCLS1-binding                                                                                                                                                                              | ---   | ---   | ---   | ---   |



|                                 |                                                                                               |       |       |       |       |
|---------------------------------|-----------------------------------------------------------------------------------------------|-------|-------|-------|-------|
| 961.2                           | protein 3-like [Sus scrofa]                                                                   |       |       |       |       |
| gi 350590394 ref XP_003131590.3 | PREDICTED:<br>pyridoxine-5~-phosphate oxidase-like [Sus scrofa]                               | 1.599 | 2.451 | 2.121 | 1.531 |
| gi 335285134 ref XP_003354782.1 | PREDICTED: charged multivesicular body protein 3-like isoform 2 [Sus scrofa]                  | 0.402 | 0.867 | 0.704 | 0.463 |
| gi 335285138 ref XP_003125011.2 | PREDICTED: charged multivesicular body protein 3-like isoform 1 [Sus scrofa]                  |       |       |       |       |
| gi 335285136 ref XP_003354783.1 | PREDICTED: charged multivesicular body protein 3-like isoform 3 [Sus scrofa]                  |       |       |       |       |
| gi 335290686 ref XP_003356247.1 | PREDICTED: tissue alpha-L-fucosidase-like [Sus scrofa]                                        | 1.253 | 0.498 | 0.564 | 0.97  |
| gi 336455302 gb AEI59128.1      | fucosidase alpha-L-1 [Sus scrofa]                                                             |       |       |       |       |
| gi 347543811 ref NP_001231562.1 | cytochrome P450, family 2, subfamily J, polypeptide 34 [Sus scrofa]                           | 0.682 | 0.669 | 0.73  | 0.888 |
| gi 194041937 ref XP_001928912.1 | PREDICTED: alpha-centractin [Sus scrofa]                                                      | 1.787 | 1.406 | 1.284 | 1.802 |
| gi 335286356 ref XP_001927203.3 | PREDICTED: copine-3 [Sus scrofa]                                                              | 0.525 | 0.444 | 0.348 | 0.456 |
| gi 346716148 ref NP_001231230.1 | importin-5 [Sus scrofa]                                                                       | 1.188 | 1.243 | 1.296 | 1.211 |
| gi 311271339 ref XP_003133112.1 | PREDICTED:<br>sphingosine-1-phosphate lyase 1 isoform 2 [Sus scrofa]                          | 0.583 | 0.569 | 0.74  | 0.661 |
| gi 311271341 ref XP_003133111.1 | PREDICTED:<br>sphingosine-1-phosphate lyase 1 isoform 1 [Sus scrofa]                          |       |       |       |       |
| gi 345091002 ref NP_001230732.1 | nuclear distribution gene C homolog [Sus scrofa]                                              | ---   | ---   | ---   | ---   |
| gi 194042094 ref XP_001925670.1 | PREDICTED: shootin-1-like isoform 1 [Sus scrofa]                                              | 0.813 | 0.553 | 0.594 | 0.553 |
| gi 113205762 ref NP_001038043.1 | granulins precursor [Sus scrofa] >gi 55247591 gb AAV48633.1  granulins precursor [Sus scrofa] | 1.234 | 1.344 | 1.056 | 0.679 |
| gi 350585670 ref XP_003127678.3 | PREDICTED: filamin-binding LIM protein 1-like isoform 1 [Sus scrofa]                          | ---   | ---   | ---   | ---   |
| gi 350585672 ref XP_003482022.1 | PREDICTED: filamin-binding LIM protein 1-like isoform 2 [Sus scrofa]                          |       |       |       |       |

|                                 |                                                                                                                                                                                                                                                          |       |       |       |       |
|---------------------------------|----------------------------------------------------------------------------------------------------------------------------------------------------------------------------------------------------------------------------------------------------------|-------|-------|-------|-------|
| gi 350594224 ref XP_003359804.2 | PREDICTED: LOW QUALITY PROTEIN: nipped-B-like protein [Sus scrofa]                                                                                                                                                                                       | ---   | ---   | ---   | ---   |
| gi 335302969 ref XP_001925494.2 | PREDICTED: Golgi reassembly-stacking protein 2 isoform 1 [Sus scrofa]                                                                                                                                                                                    | 1.023 | 1.281 | 0.907 | 1.224 |
| gi 335302971 ref XP_003359599.1 | PREDICTED: Golgi reassembly-stacking protein 2 isoform 2 [Sus scrofa]                                                                                                                                                                                    |       |       |       |       |
| gi 311258558 ref XP_003127668.1 | PREDICTED: protein DDI1 homolog 2 [Sus scrofa]                                                                                                                                                                                                           | ---   | ---   | ---   | ---   |
| gi 346716195 ref NP_001231246.1 | nucleosome assembly protein 1-like 1 [Sus scrofa] >gi 346716193 ref NP_001231245.1  nucleosome assembly protein 1-like 1 [Sus scrofa]                                                                                                                    | ---   | ---   | ---   | ---   |
| gi 335310655 ref XP_003362133.1 | PREDICTED: hypothetical protein LOC100621842 [Sus scrofa]                                                                                                                                                                                                | ---   | ---   | ---   | ---   |
| gi 335283905 ref XP_003354455.1 | PREDICTED: BET1-like protein-like isoform 2 [Sus scrofa] >gi 311250744 ref XP_003124272.1  PREDICTED: BET1-like protein-like isoform 1 [Sus scrofa]                                                                                                      | ---   | ---   | ---   | ---   |
| gi 178056852 ref NP_001116541.1 | ATP-binding cassette sub-family F member 1 [Sus scrofa] >gi 56404330 sp Q767L0.1 A BCF1_PIG RecName: Full=ATP-binding cassette sub-family F member 1 >gi 41529180 dbj BAD08439.1  ATP-binding cassette, sub-family F (GCN20), member 1 [Sus scrofa]      | ---   | ---   | ---   | ---   |
| gi 350579945 ref XP_003480721.1 | PREDICTED: barrier-to-autointegration factor-like [Sus scrofa] >gi 335281491 ref XP_003353819.1  PREDICTED: barrier-to-autointegration factor-like [Sus scrofa] >gi 335281487 ref XP_003353817.1  PREDICTED: barrier-to-autointegration factor-like [Sus | 0.942 | 1.351 | 1.123 | 0.909 |

|                                  |                                                                                                                                                                                                                                                           |       |       |       |       |
|----------------------------------|-----------------------------------------------------------------------------------------------------------------------------------------------------------------------------------------------------------------------------------------------------------|-------|-------|-------|-------|
| gi 335298830 ref XP_001925616.3  | PREDICTED: golgin subfamily A member 4 [Sus scrofa]                                                                                                                                                                                                       | 0.735 | 1.062 | 1.363 | 0.765 |
| gi 347300222 ref NP_001231422.1  | basic leucine zipper and W2 domain-containing protein 1 [Sus scrofa]                                                                                                                                                                                      | ---   | ---   | ---   | ---   |
| gi 350590801 ref XP_003483139.1  | PREDICTED: phospholipase D2-like [Sus scrofa]                                                                                                                                                                                                             | ---   | ---   | ---   | ---   |
| gi 350595116 ref XP_003360118.2  | PREDICTED: NEDD8 ultimate buster 1 [Sus scrofa]                                                                                                                                                                                                           | ---   | ---   | ---   | ---   |
| gi 116175275 ref NP_001070689.1  | transformer-2 protein homolog beta [Sus scrofa] >gi 115371737 gb ABI96193.1  TRA2B [Sus scrofa]                                                                                                                                                           | 0.879 | 1.049 | 1.069 | 1.067 |
| gi 6094365 sp O02799.1 STAT2_PIG | RecName: Full=Signal transducer and activator of transcription 2 >gi 47522708 ref NP_999054.1  signal transducer and activator of transcription 2 [Sus scrofa] >gi 315273316 gb ADU03225.1  signal transducer and activator of transcription 2 [Sus scrof | ---   | ---   | ---   | ---   |
| gi 346644866 ref NP_001231105.1  | coiled-coil-helix-coiled-coil-helix domain-containing protein 3, mitochondrial [Sus scrofa]                                                                                                                                                               | ---   | ---   | ---   | ---   |
| gi 311273314 ref XP_003133809.1  | PREDICTED: COP9 signalosome complex subunit 8-like isoform 1 [Sus scrofa]                                                                                                                                                                                 | ---   | ---   | ---   | ---   |
| gi 4538854 emb CAB39532.1        | 54 kDa vacuolar H(+)-ATPase subunit [Sus scrofa]                                                                                                                                                                                                          | ---   | ---   | ---   | ---   |
| gi 47523554 ref NP_999405.1      | V-type proton ATPase subunit H [Sus scrofa] >gi 4538856 emb CAB39533.1  54 kDa vacuolar H(+)-ATPase subunit [Sus scrofa]                                                                                                                                  |       |       |       |       |
| gi 18206257 sp Q9TVC1.1 VATH_PIG | RecName: Full=V-type proton ATPase subunit H; Short=V-ATPase subunit H; AltName: Full=V-ATPase 50/57 kDa subunits; AltName: Full=Vacuolar proton pump subunit H; AltName: Full=Vacuolar proton pump subunit SFD >gi 23956412 emb CAB39537.1  54 kDa vacuo |       |       |       |       |
| gi 311263676 ref XP_003129       | PREDICTED: dipeptidyl peptidase                                                                                                                                                                                                                           | ---   | ---   | ---   | ---   |

|                                  |                                                                                                                                                                                         |       |       |       |       |
|----------------------------------|-----------------------------------------------------------------------------------------------------------------------------------------------------------------------------------------|-------|-------|-------|-------|
| 789.1                            | 1-like [Sus scrofa]                                                                                                                                                                     |       |       |       |       |
| gi 350586576 ref XP_001929450.4  | PREDICTED: LOW QUALITY PROTEIN: peptidyl-prolyl cis-trans isomerase FKBP5 [Sus scrofa]                                                                                                  | 0.774 | 0.52  | 0.632 | 0.547 |
| gi 194035744 ref XP_001928514.1  | PREDICTED: protein Dr1-like [Sus scrofa]                                                                                                                                                | ---   | ---   | ---   | ---   |
| gi 346986339 ref NP_001231321.1  | small glutamine-rich tetratricopeptide repeat-containing protein alpha [Sus scrofa]                                                                                                     | 1.912 | 1.27  | 2.541 | 2.032 |
| gi 3023862 sp P81140.1 GCDH_PIG  | RecName: Full=Glutaryl-CoA dehydrogenase, mitochondrial; Short=GCD; Flags: Precursor >gi 260168 gb AAB24225.1  glutaryl-CoA dehydrogenase, GCDH [swine, liver, Peptide Partial, 408 aa] | ---   | ---   | ---   | ---   |
| gi 311248913 ref XP_003123376.1  | PREDICTED: glutaryl-CoA dehydrogenase, mitochondrial-like isoform 1 [Sus scrofa]                                                                                                        |       |       |       |       |
| gi 311248915 ref XP_003123377.1  | PREDICTED: glutaryl-CoA dehydrogenase, mitochondrial-like isoform 2 [Sus scrofa]                                                                                                        |       |       |       |       |
| gi 385648282 ref NP_001245314.1  | glucosidase, beta (bile acid) 2 [Sus scrofa]                                                                                                                                            | 0.636 | 0.76  | 0.737 | 0.977 |
| gi 210062464 gb ABY85807.2       | immunoglobulin gamma chain 6a [Sus scrofa]                                                                                                                                              | ---   | ---   | ---   | ---   |
| gi 311275995 ref XP_003135004.1  | PREDICTED: histone-binding protein RBBP7-like isoform 1 [Sus scrofa]                                                                                                                    | 1.042 | 0.65  | 0.931 | 1.266 |
| gi 350585895 ref XP_003127841.3  | PREDICTED: MAP7 domain-containing protein 1 [Sus scrofa]                                                                                                                                | 0.378 | 0.548 | 0.646 | 0.417 |
| gi 350592486 ref XP_001929589.3  | PREDICTED: acyl-CoA dehydrogenase family member 10 [Sus scrofa]                                                                                                                         | ---   | ---   | ---   | ---   |
| gi 350587337 ref XP_003128893.2  | PREDICTED: peroxisomal acyl-coenzyme A oxidase 3 [Sus scrofa]                                                                                                                           | ---   | ---   | ---   | ---   |
| gi 47116966 sp P61288.1 TCTP_PIG | RecName: Full=Translationally-controlled tumor protein; Short=TCTP >gi 47523802 ref NP_99                                                                                               | 0.76  | 0.917 | 0.893 | 0.853 |

|                                  |                                                                                                                                                                                                                                                          |       |       |       |       |
|----------------------------------|----------------------------------------------------------------------------------------------------------------------------------------------------------------------------------------------------------------------------------------------------------|-------|-------|-------|-------|
|                                  | 9538.1  translationally-controlled tumor protein [Sus scrofa] >gi 18482460 gb AAL68965.1  translationally controlled tumor protein [Sus scrofa]                                                                                                          |       |       |       |       |
| gi 335281686 ref XP_003353872.1  | PREDICTED: UBX domain-containing protein 1-like [Sus scrofa]                                                                                                                                                                                             | 0.843 | 1.119 | 0.973 | 0.796 |
| gi 75053356 sp Q764M6.1 IRF3_PIG | RecName: Full=Interferon regulatory factor 3; Short=IRF-3 >gi 47523300 ref NP_998935.1  interferon regulatory factor 3 [Sus scrofa] >gi 40363627 dbj BAD06317.1  interferon regulatory factor 3 [Sus scrofa]                                             | ---   | ---   | ---   | ---   |
| gi 317016904 gb ADU85980.1       | interferon regulatory factor 3 [Sus scrofa] >gi 163141076 gb ABY26589.1  interferon regulatory factor 3 [Sus scrofa]                                                                                                                                     |       |       |       |       |
| gi 261490800 ref NP_001159781.1  | survival of motor neuron-related-splicing factor 30 [Sus scrofa] >gi 190333253 gb ACE73645.1  survival motor neuron domain-containing protein 1 [Sus scrofa] >gi 190576653 gb ACE73646.1  survival motor neuron domain-containing protein 1 [Sus scrofa] | 0.834 | 1.322 | 1.148 | 1.092 |
| gi 335282050 ref XP_003122930.2  | PREDICTED: caprin-1 isoform 1 [Sus scrofa]                                                                                                                                                                                                               | ---   | ---   | ---   | ---   |
| gi 335282052 ref XP_003353957.1  | PREDICTED: caprin-1 isoform 2 [Sus scrofa]                                                                                                                                                                                                               |       |       |       |       |
| gi 148235477 ref NP_001090932.1  | protein QIL1 precursor [Sus scrofa] >gi 148839601 sp A1XQR7.1  QIL1_PIG RecName: Full=Protein QIL1 >gi 117660492 gb ABK55623.1  QIL1 [Sus scrofa]                                                                                                        | ---   | ---   | ---   | ---   |
| gi 335301140 ref XP_003359135.1  | PREDICTED: transmembrane emp24 domain-containing protein 2-like isoform 1 [Sus scrofa]                                                                                                                                                                   | 1.466 | 1.188 | 1.206 | 1.585 |
| gi 335301142 ref XP_003359136.1  | PREDICTED: transmembrane emp24 domain-containing protein 2-like                                                                                                                                                                                          |       |       |       |       |

|                                 |                                                                                                                                                                                                                                                           |       |       |       |       |
|---------------------------------|-----------------------------------------------------------------------------------------------------------------------------------------------------------------------------------------------------------------------------------------------------------|-------|-------|-------|-------|
|                                 | isoform 2 [Sus scrofa]                                                                                                                                                                                                                                    |       |       |       |       |
| gi 148231223 ref NP_001090898.1 | mitochondrial antiviral-signaling protein [Sus scrofa] >gi 156144883 gb ABU53000.1  virus-induced signaling adapter [Sus scrofa] >gi 119507309 dbj BAF42542.1  mitochondrial antiviral signaling protein [Sus scrofa]                                     | 0.771 | 1.333 | 1.416 | 1.219 |
| gi 238176 gb AAB20199.1         | 3,4-dihydroxyphenylalanine (Dopa) decarboxylase [swine, kidney, Peptide, 485 aa]                                                                                                                                                                          | ---   | ---   | ---   | ---   |
| gi 126513274 gb ABO15741.1      | L-aromatic dopa decarboxylase [Sus scrofa]                                                                                                                                                                                                                |       |       |       |       |
| gi 47523148 ref NP_999019.1     | aromatic-L-amino-acid decarboxylase [Sus scrofa] >gi 2829681 sp P80041.2 DDC_PIG RecName: Full=Aromatic-L-amino-acid decarboxylase; Short=AADC; AltName: Full=DOPA decarboxylase; Short=DDC >gi 1839555 gb AAB47157.1  dopa decarboxylase [Sus scrofa] >g |       |       |       |       |
| gi 126513279 gb ABO15742.1      | L-aromatic dopa decarboxylase splice variant 1 [Sus scrofa]                                                                                                                                                                                               |       |       |       |       |
| gi 350580560 ref XP_003123249.3 | PREDICTED: transcription activator BRG1 [Sus scrofa]                                                                                                                                                                                                      | 1.009 | 0.858 | 1.256 | 0.901 |
| gi 311262372 ref XP_003129135.1 | PREDICTED: N-acylethanolamine-hydrolyzing acid amidase-like [Sus scrofa]                                                                                                                                                                                  | ---   | ---   | ---   | ---   |
| gi 335292565 ref XP_003128593.2 | PREDICTED: charged multivesicular body protein 4a-like [Sus scrofa]                                                                                                                                                                                       | ---   | ---   | ---   | ---   |
| gi 343403828 ref NP_001230291.1 | serine beta-lactamase-like protein LACTB, mitochondrial [Sus scrofa]                                                                                                                                                                                      | 0.703 |       |       | 0.932 |
| gi 194036296 ref XP_001926524.1 | PREDICTED: splicing factor 3B subunit 4 [Sus scrofa]                                                                                                                                                                                                      | 0.863 | 1.231 | 1.161 | 0.76  |
| gi 297632428 ref NP_001172097.1 | 28S ribosomal protein S28, mitochondrial [Sus scrofa]                                                                                                                                                                                                     | 0.837 | 0.477 | 0.428 | 0.701 |
| gi 350582501 ref XP_003481284.1 | PREDICTED: atlastin-2-like isoform 2 [Sus scrofa]                                                                                                                                                                                                         | 1.596 | 1.146 | 0.929 | 1.273 |

|                                 |                                                                                                                                                                                                                           |       |       |       |       |
|---------------------------------|---------------------------------------------------------------------------------------------------------------------------------------------------------------------------------------------------------------------------|-------|-------|-------|-------|
| gi 350582505 ref XP_003125271.2 | PREDICTED: atlastin-2-like isoform 1 [Sus scrofa]                                                                                                                                                                         |       |       |       |       |
| gi 350582503 ref XP_003481285.1 | PREDICTED: atlastin-2-like isoform 3 [Sus scrofa]                                                                                                                                                                         |       |       |       |       |
| gi 298104120 ref NP_001177123.1 | V-type proton ATPase subunit G 1 [Sus scrofa]                                                                                                                                                                             | 0.329 | 0.557 | 0.485 | 0.429 |
| gi 118403868 ref NP_001072136.1 | N-acetylglucosaminyltransferase I [Sus scrofa] >gi 112821182 dbj BAF03221.1  N-acetylglucosaminyltransferase I [Sus scrofa]                                                                                               | ---   | ---   | ---   | ---   |
| gi 194045136 ref XP_001927417.1 | PREDICTED: immunoglobulin-binding protein 1 isoform 2 [Sus scrofa]                                                                                                                                                        | 0.871 | 0.641 | 0.531 | 0.896 |
| gi 194045138 ref XP_001927405.1 | PREDICTED: immunoglobulin-binding protein 1 isoform 1 [Sus scrofa]                                                                                                                                                        |       |       |       |       |
| gi 311264357 ref XP_003130126.1 | PREDICTED: suppressor of tumorigenicity 14 protein homolog [Sus scrofa]                                                                                                                                                   | ---   | ---   | ---   | ---   |
| gi 147899011 ref NP_001090950.1 | 40S ribosomal protein S26 [Sus scrofa] >gi 187606917 sp P49171.4 R S26_PIG RecName: Full=40S ribosomal protein S26 >gi 117661156 gb ABK55657.1  RPS26 [Sus scrofa]                                                        | ---   | ---   | ---   | ---   |
| gi 335307625 ref XP_003360911.1 | PREDICTED: 40S ribosomal protein S26-like [Sus scrofa]                                                                                                                                                                    |       |       |       |       |
| gi 350588024 ref XP_003482537.1 | PREDICTED: heterogeneous nuclear ribonucleoprotein D0-like [Sus scrofa]                                                                                                                                                   | ---   | ---   | ---   | ---   |
| gi 311254587 ref XP_003125898.1 | PREDICTED: CTTNBP2 N-terminal like [Sus scrofa]                                                                                                                                                                           | ---   | ---   | ---   | ---   |
| gi 147899312 ref NP_001090923.1 | F-actin capping protein subunit alpha 1 [Sus scrofa] >gi 148613357 gb ABQ96222.1  F-actin capping protein alpha 1 subunit [Sus scrofa] >gi 118627572 emb CAL69435.1  F-actin capping protein subunit alpha 1 [Sus scrofa] | ---   | ---   | ---   | ---   |
| gi 350583525 ref XP_003481537.1 | PREDICTED: hypothetical protein LOC100737138 [Sus scrofa]                                                                                                                                                                 |       |       |       |       |

|                                 |                                                                                                                                                                                                                                                                |       |       |       |       |
|---------------------------------|----------------------------------------------------------------------------------------------------------------------------------------------------------------------------------------------------------------------------------------------------------------|-------|-------|-------|-------|
| gi 311268984 ref XP_003132296.1 | PREDICTED: glycerate kinase-like [Sus scrofa]                                                                                                                                                                                                                  | 1.015 | 0.491 | 0.604 | 0.683 |
| gi 350592016 ref XP_003358886.2 | PREDICTED: LOW QUALITY PROTEIN: protein TFG [Sus scrofa]                                                                                                                                                                                                       | ---   | ---   | ---   | ---   |
| gi 229626 prf 770504A           | hemoglobin alpha                                                                                                                                                                                                                                               | ---   | ---   | ---   | ---   |
| gi 402550455 pdb 4F4O J         | Chain J, Structure Of The Haptoglobin-Haemoglobin Complex >gi 402550449 pdb 4F4O D<br>Chain D, Structure Of The Haptoglobin-Haemoglobin Complex >gi 402550452 pdb 4F4O G<br>Chain G, Structure Of The Haptoglobin-Haemoglobin Complex >gi 402550446 pdb 4F4O A |       |       |       |       |
| gi 350581852 ref XP_003481137.1 | PREDICTED: hemoglobin subunit alpha-like isoform 6 [Sus scrofa] >gi 350581848 ref XP_003481135.1  PREDICTED: hemoglobin subunit alpha-like isoform 4 [Sus scrofa] >gi 350581844 ref XP_003481133.1  PREDICTED: hemoglobin subunit alpha-like isoform 2 [S      |       |       |       |       |
| gi 178056781 ref NP_001116594.1 | histone H2A.Z [Sus scrofa] >gi 166407422 gb ABY87518.1  H2A histone family member Z [Sus scrofa]                                                                                                                                                               | ---   | ---   | ---   | ---   |
| gi 350595451 ref XP_003134922.3 | PREDICTED: histone H2A.V-like [Sus scrofa]                                                                                                                                                                                                                     |       |       |       |       |
| gi 348605274 ref NP_001231762.1 | alcohol dehydrogenase 5 (class III), chi polypeptide [Sus scrofa]                                                                                                                                                                                              | 1.887 | 0.872 | 0.792 | 1.618 |
| gi 335310819 ref XP_003362206.1 | PREDICTED: ankyrin repeat and LEM domain-containing protein 2, partial [Sus scrofa]                                                                                                                                                                            | ---   | ---   | ---   | ---   |
| gi 335296651 ref XP_003130877.2 | PREDICTED: tubulin alpha chain-like 3-like [Sus scrofa]                                                                                                                                                                                                        | ---   | ---   | ---   | ---   |
| gi 350589654 ref XP_003357831.2 | PREDICTED: tubulin alpha chain-like 3, partial [Sus scrofa]                                                                                                                                                                                                    |       |       |       |       |
| gi 311245655 ref XP_003121912.1 | PREDICTED: nesprin-2-like [Sus scrofa]                                                                                                                                                                                                                         | ---   | ---   | ---   | ---   |
| gi 330340461 ref NP_001193383.1 | 2-hydroxyacyl-CoA lyase 1 [Sus scrofa]                                                                                                                                                                                                                         | ---   | ---   | ---   | ---   |
| gi 335278852 ref XP_003353      | PREDICTED: sorting nexin-9 [Sus                                                                                                                                                                                                                                | 1.186 | 0.908 | 0.906 | 0.666 |



|                                 |                                                                                                                                                                                                                                                            |       |       |       |       |
|---------------------------------|------------------------------------------------------------------------------------------------------------------------------------------------------------------------------------------------------------------------------------------------------------|-------|-------|-------|-------|
| 219.1                           | scrofa]                                                                                                                                                                                                                                                    |       |       |       |       |
| gi 308081427 ref NP_001183950.1 | hydroxysteroid dehydrogenase-like protein 2 [Sus scrofa]                                                                                                                                                                                                   | 0.789 | 0.489 | 0.551 | 0.593 |
| gi 160333766 ref NP_001103898.1 | protein canopy homolog 3 precursor [Sus scrofa] >gi 166216082 sp A5GFQ5.1  CNPY3_PIG RecName: Full=Protein canopy homolog 3; AltName: Full=Trinucleotide repeat-containing gene 5 protein; Flags: Precursor >gi 147223347 emb CAN13167.1  trinucleotide re | 0.942 | 0.367 | 0.762 | 0.836 |
| gi 346986322 ref NP_001231315.1 | peptidyl-prolyl cis-trans isomerase D [Sus scrofa]                                                                                                                                                                                                         | 0.891 | 1.065 | 0.833 | 1.246 |
| gi 350583831 ref XP_003355400.2 | PREDICTED: pyridoxal phosphate phosphatase-like, partial [Sus scrofa]                                                                                                                                                                                      | ---   | ---   | ---   | ---   |
| gi 335284421 ref XP_003354609.1 | PREDICTED: ataxin 2-like [Sus scrofa]                                                                                                                                                                                                                      | ---   | ---   | ---   | ---   |
| gi 335284425 ref XP_003354611.1 | PREDICTED: ataxin 2-like [Sus scrofa]                                                                                                                                                                                                                      |       |       |       |       |
| gi 335284427 ref XP_003354612.1 | PREDICTED: ataxin 2-like [Sus scrofa]                                                                                                                                                                                                                      |       |       |       |       |
| gi 335284423 ref XP_003354610.1 | PREDICTED: ataxin 2-like [Sus scrofa]                                                                                                                                                                                                                      |       |       |       |       |
| gi 335284429 ref XP_003124559.2 | PREDICTED: ataxin 2-like isoform 1 [Sus scrofa]                                                                                                                                                                                                            |       |       |       |       |
| gi 350585179 ref XP_003481897.1 | PREDICTED: seryl-tRNA synthetase, mitochondrial-like [Sus scrofa]                                                                                                                                                                                          | 1.123 | 0.969 | 1.234 | 1.477 |
| gi 311266963 ref XP_003131335.1 | PREDICTED: putative rRNA methyltransferase 3 [Sus scrofa]                                                                                                                                                                                                  | ---   | ---   | ---   | ---   |
| gi 350586678 ref XP_003482243.1 | PREDICTED: DNA-directed RNA polymerases I and III subunit RPAC1 [Sus scrofa]                                                                                                                                                                               | ---   | ---   | ---   | ---   |
| gi 311247599 ref XP_003122720.1 | PREDICTED: vacuolar protein sorting-associated protein 37C-like [Sus scrofa]                                                                                                                                                                               | ---   | ---   | ---   | ---   |
| gi 311262785 ref XP_003129351.1 | PREDICTED: regulator complex protein LAMTOR3-like isoform 3 [Sus scrofa] >gi 311262781 ref XP_003129349.1  PREDICTED: regulator                                                                                                                            | 0.677 | 0.447 | 0.638 | 0.591 |

|                                 |                                                                                                                                                                                                                                                            |       |       |       |       |
|---------------------------------|------------------------------------------------------------------------------------------------------------------------------------------------------------------------------------------------------------------------------------------------------------|-------|-------|-------|-------|
|                                 | complex protein LAMTOR3-like isoform 1 [Sus scrofa] >gi 311262783 ref XP_003129350.1  PREDICTED: ragulator complex protei                                                                                                                                  |       |       |       |       |
| gi 342349340 ref NP_001230146.1 | carnitine O-octanoyltransferase [Sus scrofa]                                                                                                                                                                                                               | ---   | ---   | ---   | ---   |
| gi 311253960 ref XP_001927701.2 | PREDICTED: NADH dehydrogenase [ubiquinone] iron-sulfur protein 2, mitochondrial [Sus scrofa]                                                                                                                                                               | ---   | ---   | ---   | ---   |
| gi 343790970 ref NP_001230536.1 | translin-associated protein X [Sus scrofa]                                                                                                                                                                                                                 | ---   | ---   | 1.122 | ---   |
| gi 335303755 ref XP_003359787.1 | PREDICTED: Golgi phosphoprotein 3-like [Sus scrofa]                                                                                                                                                                                                        | ---   | ---   | ---   | ---   |
| gi 311272290 ref XP_003133380.1 | PREDICTED: CDKN2A-interacting protein isoform 1 [Sus scrofa]                                                                                                                                                                                               | ---   | ---   | ---   | ---   |
| gi 335302635 ref XP_003359511.1 | PREDICTED: CDKN2A-interacting protein isoform 2 [Sus scrofa]                                                                                                                                                                                               |       |       |       |       |
| gi 47522786 ref NP_999145.1     | UTP--glucose-1-phosphate uridylyltransferase [Sus scrofa] >gi 6136110 sp P79303.3 UGPA_PIG RecName: Full=UTP--glucose-1-phosphate uridylyltransferase; AltName: Full=UDP-glucose pyrophosphorylase; Short=UDPGP; Short=UGPase >gi 1752677 emb CAA67690.1   | 1.821 | 1.319 | 1.126 | 2.247 |
| gi 298104080 ref NP_001177107.1 | ribosomal protein L30 [Sus scrofa]                                                                                                                                                                                                                         | ---   | ---   | ---   | ---   |
| gi 47522710 ref NP_999050.1     | mannosyl-oligosaccharide 1,2-alpha-mannosidase IA [Sus scrofa] >gi 41017248 sp O02773.1 M A1A1_PIG RecName: Full=Mannosyl-oligosaccharide 1,2-alpha-mannosidase IA; AltName: Full=Man(9)-alpha-mannosidase; Short=Man9-mannosidase; AltName: Full=Mannosid | ---   | ---   | ---   | ---   |
| gi 156120140 ref NP_001095287.1 | helicase SKI2W [Sus scrofa] >gi 148724903 emb CAN87691.1  superkiller viralicidic activity 2-like (S. cerevisiae) [Sus scrofa]                                                                                                                             | 0.943 | 1.061 | 1.13  | 0.702 |

|                                 |                                                                                                                                                                                                                                                           |       |       |       |       |
|---------------------------------|-----------------------------------------------------------------------------------------------------------------------------------------------------------------------------------------------------------------------------------------------------------|-------|-------|-------|-------|
| gi 162138264 gb ABX82836.1      | putative superkiller viralicidic activity 2 protein [Sus scrofa]                                                                                                                                                                                          |       |       |       |       |
| gi 335284313 ref XP_003124517.2 | PREDICTED: RNA-binding protein FUS-like isoform 1 [Sus scrofa]                                                                                                                                                                                            | 0.713 | 0.899 | 0.633 | 1.032 |
| gi 335284315 ref XP_003354570.1 | PREDICTED: RNA-binding protein FUS-like isoform 2 [Sus scrofa]                                                                                                                                                                                            |       |       |       |       |
| gi 351738724 gb AEQ61462.1      | FUS [Sus scrofa]                                                                                                                                                                                                                                          |       |       |       |       |
| gi 311260957 ref XP_003128592.1 | PREDICTED: NEDD8-like [Sus scrofa]                                                                                                                                                                                                                        | 1.32  | 2.052 | 1.478 | 1.848 |
| gi 335292563 ref XP_003356757.1 | PREDICTED: NEDD8-like [Sus scrofa]                                                                                                                                                                                                                        |       |       |       |       |
| gi 194038855 ref XP_001928049.1 | PREDICTED: hypothetical protein LOC100154068 [Sus scrofa]                                                                                                                                                                                                 | ---   | ---   | ---   | ---   |
| gi 350591669 ref XP_003483310.1 | PREDICTED: GMP synthase [glutamine-hydrolyzing]-like [Sus scrofa]                                                                                                                                                                                         | ---   | ---   | ---   | ---   |
| gi 335299136 ref XP_003358504.1 | PREDICTED: poly [ADP-ribose] polymerase 3 [Sus scrofa]                                                                                                                                                                                                    | 0.853 | 0.943 |       | 0.951 |
| gi 116175255 ref NP_001070683.1 | regulator of differentiation 1 [Sus scrofa] >gi 115371761 gb ABI96205.1  ROD1 [Sus scrofa]                                                                                                                                                                | ---   | ---   | ---   | ---   |
| gi 47523818 ref NP_999546.1     | calcium/calmodulin-dependent protein kinase type II subunit delta [Sus scrofa] >gi 75073672 sp Q95266.1 KCC2D_PIG RecName: Full=Calcium/calmodulin-dependent protein kinase type II subunit delta; Short=CaM kinase II subunit delta; Short=CaMK-II subun | 1.253 | 1.013 | 0.852 | 1.523 |
| gi 307078155 ref NP_001182495.1 | splicing factor, arginine/serine-rich 9 [Sus scrofa]                                                                                                                                                                                                      | ---   | ---   | ---   | ---   |
| gi 349732254 ref NP_001231868.1 | glutathione S-transferase Mu 3-like [Sus scrofa]                                                                                                                                                                                                          | ---   | ---   | ---   | ---   |
| gi 335293678 ref XP_003357027.1 | PREDICTED: ras GTPase-activating protein-binding protein 2 isoform 1 [Sus scrofa]                                                                                                                                                                         | ---   | ---   | ---   | ---   |
| gi 335293682 ref XP_003357029.1 | PREDICTED: ras GTPase-activating protein-binding protein 2 isoform 3 [Sus scrofa] >gi 335293680 ref XP_00335                                                                                                                                              |       |       |       |       |

|                                 |                                                                                                                                                                               |       |       |       |       |
|---------------------------------|-------------------------------------------------------------------------------------------------------------------------------------------------------------------------------|-------|-------|-------|-------|
|                                 | 7028.1  PREDICTED: ras GTPase-activating protein-binding protein 2 isoform 2 [Sus scrofa]                                                                                     |       |       |       |       |
| gi 335293613 ref XP_003357005.1 | PREDICTED: UDP-glucuronosyltransferase 2C1-like [Sus scrofa]                                                                                                                  | ---   | ---   | ---   | ---   |
| gi 335308671 ref XP_003361329.1 | PREDICTED: 60S ribosomal protein L23a-like [Sus scrofa] >gi 311267953 ref XP_003131820.1  PREDICTED: 60S ribosomal protein L23a-like [Sus scrofa]                             | 0.436 | 0.214 | 0.141 | 0.499 |
| gi 350593534 ref XP_003483707.1 | PREDICTED: grancalcin-like [Sus scrofa]                                                                                                                                       | 1.5   | 0.974 | 1.667 | 1.364 |
| gi 350593538 ref XP_003483709.1 | PREDICTED: grancalcin-like [Sus scrofa]                                                                                                                                       |       |       |       |       |
| gi 311271760 ref XP_003133218.1 | PREDICTED: nucleolar and coiled-body phosphoprotein 1 [Sus scrofa]                                                                                                            | ---   | ---   | ---   | ---   |
| gi 350587063 ref XP_001924746.3 | PREDICTED: YLP motif-containing protein 1 [Sus scrofa]                                                                                                                        | 0.939 | 1.091 | 1.197 | 0.542 |
| gi 311258899 ref XP_003127836.1 | PREDICTED: poly(ADP-ribose) glycohydrolase ARH3-like [Sus scrofa]                                                                                                             | ---   | ---   | ---   | ---   |
| gi 350585235 ref XP_003481909.1 | PREDICTED: coiled-coil domain-containing protein 97-like [Sus scrofa] >gi 350585231 ref XP_003127200.3  PREDICTED: coiled-coil domain-containing protein 97-like [Sus scrofa] | 0.869 | 1.668 | 0.938 | 0.981 |
| gi 335286349 ref XP_001927382.3 | PREDICTED: regulator of microtubule dynamics protein 1 [Sus scrofa]                                                                                                           | ---   | ---   | ---   | ---   |
| gi 350590765 ref XP_003358260.2 | PREDICTED: zinc finger ZZ-type and EF-hand domain-containing protein 1-like, partial [Sus scrofa]                                                                             | ---   | ---   | ---   | ---   |
| gi 346227226 ref NP_001230999.1 | 40S ribosomal protein S11 [Sus scrofa]                                                                                                                                        | 0.559 | 0.52  | 0.403 | 1.019 |
| gi 346644805 ref NP_001231160.1 | pinin [Sus scrofa]                                                                                                                                                            | 0.459 | 0.95  | 0.861 | 0.838 |
| gi 350589580 ref XP_003130823.3 | PREDICTED: dnaJ homolog subfamily C member 1 [Sus scrofa]                                                                                                                     | ---   | ---   | ---   | ---   |

|                                   |                                                                                                                                                                                                                                                           |       |       |       |       |
|-----------------------------------|-----------------------------------------------------------------------------------------------------------------------------------------------------------------------------------------------------------------------------------------------------------|-------|-------|-------|-------|
| gi 350580945 ref XP_003480928.1   | PREDICTED: endoplasmic reticulum aminopeptidase 2-like [Sus scrofa]                                                                                                                                                                                       | 0.852 | 0.642 | 0.618 | 0.901 |
| gi 297632397 ref NP_001172084.1   | high mobility group protein HMG-I/HMG-Y isoform 2 [Sus scrofa] >gi 294494645 gb ADE93010.1  high mobility group AT-hook protein 1 [Sus scrofa]                                                                                                            | ---   | ---   | ---   | ---   |
| gi 75050051 sp Q9GLV6.1 DDX58_PIG | RecName: Full=Probable ATP-dependent RNA helicase DDX58; AltName: Full=DEAD box protein 58; AltName: Full=RHIV-1; AltName: Full=RIG-I-like receptor 1; Short=RLR-1; AltName: Full=RNA helicase induced by virus; AltName: Full=Retinoic acid-inducible ge | ---   | ---   | ---   | ---   |
| gi 350596885 ref XP_003484332.1   | PREDICTED: probable ATP-dependent RNA helicase DDX58-like, partial [Sus scrofa]                                                                                                                                                                           |       |       |       |       |
| gi 157272171 gb ABV26717.1        | DEAD/H (Asp-Glu-Ala-Asp/His) box polypeptide [Sus scrofa]                                                                                                                                                                                                 |       |       |       |       |
| gi 356460981 ref NP_998969.2      | probable ATP-dependent RNA helicase DDX58 [Sus scrofa] >gi 224176124 dbj BAH23574.1  DEAD box polypeptide 58 [Sus scrofa]                                                                                                                                 |       |       |       |       |
| gi 349732258 ref NP_001231869.1   | uroporphyrinogen decarboxylase [Sus scrofa]                                                                                                                                                                                                               | ---   | ---   | ---   | ---   |
| gi 350579853 ref XP_003480698.1   | PREDICTED: liprin-alpha-1-like [Sus scrofa]                                                                                                                                                                                                               | 1.347 | 1.462 | 1.395 | 0.919 |
| gi 350596914 ref XP_003361801.2   | PREDICTED: dihydroorotate dehydrogenase (quinone), mitochondrial-like [Sus scrofa]                                                                                                                                                                        | ---   | ---   | ---   | ---   |
| gi 350582270 ref XP_003125088.3   | PREDICTED: zinc finger protein 638-like [Sus scrofa]                                                                                                                                                                                                      | 0.733 | 0.873 | 1.286 | 0.906 |
| gi 346716375 ref NP_001231201.1   | integrin alpha-2 precursor [Sus scrofa]                                                                                                                                                                                                                   | 0.908 | 0.498 | 0.769 | 0.679 |
| gi 335297522 ref XP_003131393.2   | PREDICTED: LOW QUALITY PROTEIN: glycylopeptide N-tetradecanoyltransferase 1 [Sus scrofa]                                                                                                                                                                  | ---   | ---   | ---   | ---   |
| gi 350590362 ref XP_003483042.1   | PREDICTED: protein phosphatase 1 regulatory subunit 1B-like [Sus scrofa]                                                                                                                                                                                  | 0.988 | 0.887 | 0.978 | 1.135 |

|                                  |                                                                                                                                                                                                                                                           |       |       |       |       |
|----------------------------------|-----------------------------------------------------------------------------------------------------------------------------------------------------------------------------------------------------------------------------------------------------------|-------|-------|-------|-------|
| gi 47522648 ref NP_999086.1      | beta-hexosaminidase subunit beta precursor [Sus scrofa] >gi 1041667 emb CAA63123.1  65 kDa epididymal boar protein [Sus scrofa]                                                                                                                           | ---   | ---   | ---   | ---   |
| gi 262072808 dbj BAI47712.1      | hexosaminidase B (beta polypeptide) [Sus scrofa]                                                                                                                                                                                                          |       |       |       |       |
| gi 78100037 sp Q29548.2 HEXB_PIG | RecName: Full=Beta-hexosaminidase subunit beta; AltName: Full=65 kDa epididymal boar protein; AltName: Full=Beta-N-acetylhexosaminidase subunit beta; Short=Hexosaminidase subunit B; AltName: Full=N-acetyl-beta-glucosaminidase subunit beta; Flags: Pr |       |       |       |       |
| gi 311248396 ref XP_003123114.1  | PREDICTED: endophilin-A2-like [Sus scrofa]                                                                                                                                                                                                                | ---   | ---   | ---   | ---   |
| gi 113205798 ref NP_001038052.1  | serine/arginine-rich splicing factor 11 [Sus scrofa] >gi 104295153 gb ABF72046.1  splicing factor, arginine/serine-rich 11 [Sus scrofa]                                                                                                                   | ---   | ---   | ---   | ---   |
| gi 311276941 ref XP_003135418.1  | PREDICTED: apoptosis-inducing factor 1, mitochondrial isoform 1 [Sus scrofa]                                                                                                                                                                              | 0.848 | 0.56  | 0.777 | 0.636 |
| gi 311276943 ref XP_003135419.1  | PREDICTED: apoptosis-inducing factor 1, mitochondrial isoform 2 [Sus scrofa]                                                                                                                                                                              |       |       |       |       |
| gi 335306508 ref XP_003360488.1  | PREDICTED: apoptosis-inducing factor 1, mitochondrial [Sus scrofa]                                                                                                                                                                                        |       |       |       |       |
| gi 335299816 ref XP_003358692.1  | PREDICTED: latexin-like [Sus scrofa]                                                                                                                                                                                                                      | ---   | ---   | ---   | ---   |
| gi 335289036 ref XP_003355772.1  | PREDICTED: adenine phosphoribosyltransferase-like [Sus scrofa] >gi 311256890 ref XP_003126852.1  PREDICTED: adenine phosphoribosyltransferase-like [Sus scrofa]                                                                                           | 1.231 | 1.138 | 1.085 | 0.799 |
| gi 343072 gb AAA32030.1          | ATPase 8, partial (mitochondrion) [Sus scrofa]                                                                                                                                                                                                            | 0.683 | 0.285 | 0.431 | 0.745 |
| gi 223976083 ref YP_002600781.1  | ATP synthase F0 subunit 8 [Sus scrofa domesticus] >gi 5835867 ref NP_008                                                                                                                                                                                  |       |       |       |       |

|                                 |                                                                                                                                                                                                                                                          |       |       |       |       |
|---------------------------------|----------------------------------------------------------------------------------------------------------------------------------------------------------------------------------------------------------------------------------------------------------|-------|-------|-------|-------|
|                                 | 638.1 ATP8_15069 ATP synthase F0 subunit 8 [Sus scrofa] >gi 347448714 gb AEO93028.1  ATP synthase F0 subunit 8 (mitochondrion) [Sus scrofa] >gi 347448658 gb AEO92976.1  ATP synt                                                                        |       |       |       |       |
| gi 209166273 gb ACI41640.1      | ATP synthase F0 subunit 8 [Sus scrofa]                                                                                                                                                                                                                   |       |       |       |       |
| gi 262072813 dbj BAI47714.1     | hydroxysteroid (17-beta) dehydrogenase 12 [Sus scrofa]                                                                                                                                                                                                   | 0.728 | 0.376 | 0.498 | 0.648 |
| gi 335281993 ref XP_003353940.1 | PREDICTED: estradiol 17-beta-dehydrogenase 12 [Sus scrofa]                                                                                                                                                                                               |       |       |       |       |
| gi 8569334 pdb 1EIO A           | Chain A, Ileal Lipid Binding Protein In Complex With Glycocholate                                                                                                                                                                                        | 1.497 | 1.823 | 0.959 | 0.734 |
| gi 356460931 ref NP_999380.2    | gastrotropin [Sus scrofa]                                                                                                                                                                                                                                |       |       |       |       |
| gi 157830915 pdb 1EAL A         | Chain A, Nmr Study Of Ileal Lipid Binding Protein                                                                                                                                                                                                        |       |       |       |       |
| gi 125151 sp P00571.1 KAD1_PIG  | RecName: Full=Adenylate kinase isoenzyme 1; Short=AK 1; AltName: Full=ATP-AMP transphosphorylase 1; AltName: Full=Myokinase >gi 350579686 ref XP_003122225.3  PREDICTED: adenylate kinase isoenzyme 1 isoform 1 [Sus scrofa] >gi 229498 prf 742496A kina | ---   | ---   | ---   | ---   |
| gi 313507265 pdb 3ADK A         | Chain A, Refined Structure Of Porcine Cytosolic Adenylate Kinase At 2.1 Angstroms Resolution                                                                                                                                                             |       |       |       |       |
| gi 350579688 ref XP_003480663.1 | PREDICTED: adenylate kinase isoenzyme 1 [Sus scrofa]                                                                                                                                                                                                     |       |       |       |       |
| gi 194035478 ref XP_001924964.1 | PREDICTED: 60S ribosomal protein L8 [Sus scrofa]                                                                                                                                                                                                         | ---   | ---   | ---   | ---   |
| gi 87133208 gb ABD24291.1       | Tax1 binding protein 3 [Sus scrofa]                                                                                                                                                                                                                      | ---   | ---   | ---   | ---   |
| gi 311268143 ref XP_003131896.1 | PREDICTED: tax1-binding protein 3-like [Sus scrofa]                                                                                                                                                                                                      |       |       |       |       |
| gi 350589935 ref XP_003131063.3 | PREDICTED: tax1-binding protein 3-like, partial [Sus scrofa]                                                                                                                                                                                             |       |       |       |       |
| gi 194036902 ref XP_001927      | PREDICTED: prefoldin subunit                                                                                                                                                                                                                             | ---   | ---   | ---   | ---   |

|                                      |                                                                                                                                                                                                              |       |       |       |       |
|--------------------------------------|--------------------------------------------------------------------------------------------------------------------------------------------------------------------------------------------------------------|-------|-------|-------|-------|
| 358.1                                | 2-like [Sus scrofa]                                                                                                                                                                                          |       |       |       |       |
| gi 350595023 ref XP_003484029.1      | PREDICTED: brefeldin A-inhibited guanine nucleotide-exchange protein 2 [Sus scrofa]                                                                                                                          | ---   | ---   | ---   | ---   |
| gi 194044826 ref XP_001927474.1      | PREDICTED: [Pyruvate dehydrogenase [lipoamide]] kinase isozyme 3, mitochondrial isoform 1 [Sus scrofa]                                                                                                       | ---   | ---   | ---   | ---   |
| gi 335305794 ref XP_003360296.1      | PREDICTED: [Pyruvate dehydrogenase [lipoamide]] kinase isozyme 3, mitochondrial isoform 2 [Sus scrofa]                                                                                                       |       |       |       |       |
| gi 311263751 ref XP_003129801.1      | PREDICTED: protein CWC15 homolog isoform 2 [Sus scrofa]                                                                                                                                                      | ---   | ---   | ---   | ---   |
| gi 335294720 ref XP_003129800.2      | PREDICTED: protein CWC15 homolog isoform 1 [Sus scrofa]                                                                                                                                                      |       |       |       |       |
| gi 90903287 gb ABE02211.1            | MX2 [Sus scrofa]                                                                                                                                                                                             | ---   | ---   | ---   | ---   |
| gi 206557741 sp A7VK00.1 <br>MX2_PIG | RecName: Full=Interferon-induced GTP-binding protein Mx2; AltName: Full=Myxovirus resistance protein 2 >gi 210050415 dbj BAG80705.1  Mx2 protein [Sus scrofa] >gi 156720189 dbj BAF76735.1  Mx2 [Sus scrofa] |       |       |       |       |
| gi 148235632 ref NP_001090885.1      | interferon-induced GTP-binding protein Mx2 [Sus scrofa] >gi 58701898 gb AAW81693.1  MX2 [Sus scrofa]                                                                                                         |       |       |       |       |
| gi 311253020 ref XP_003125380.1      | PREDICTED: putative peptidyl-tRNA hydrolase PTRHD1-like [Sus scrofa]                                                                                                                                         | 0.406 | 0.392 | 0.647 | 0.521 |
| gi 311258562 ref XP_003127670.1      | PREDICTED: agmatinase, mitochondrial-like [Sus scrofa]                                                                                                                                                       | 1.979 | 0.893 | 1.312 | 1.357 |
| gi 1016321 gb AAA79108.1             | cytochrome P450 2C35, partial [Sus scrofa]                                                                                                                                                                   | ---   | ---   | ---   | ---   |
| gi 47523894 ref NP_999585.1          | cytochrome P450 2C49 precursor [Sus scrofa] >gi 19071840 dbj BAB85664.1  cytochrome P450 2C49 [Sus scrofa]                                                                                                   |       |       |       |       |
| gi 311248306 ref XP_003123072.1      | PREDICTED: U6 snRNA-associated Sm-like protein LSm7-like [Sus                                                                                                                                                | 0.751 | 0.974 | 1.158 | 1.071 |



|                                    |                                                                                                                                                                                                                               |       |       |       |       |
|------------------------------------|-------------------------------------------------------------------------------------------------------------------------------------------------------------------------------------------------------------------------------|-------|-------|-------|-------|
|                                    | scrofa]                                                                                                                                                                                                                       |       |       |       |       |
| gi 335288048 ref XP_001927642.3    | PREDICTED: partner of Y14 and mago-like [Sus scrofa]                                                                                                                                                                          | ---   | ---   | ---   | ---   |
| gi 37934198 gb AAP68768.1          | 2,4-dienoyl-CoA reductase [Sus scrofa]                                                                                                                                                                                        | 1.33  | 0.905 | 0.922 | 0.844 |
| gi 346421316 ref NP_001177161.2    | 2,4-dienoyl-CoA reductase, mitochondrial [Sus scrofa]                                                                                                                                                                         |       |       |       |       |
| gi 295442674 gb ADG21261.1         | 2,4-dienoyl-CoA reductase 1 [Sus scrofa]                                                                                                                                                                                      |       |       |       |       |
| gi 350582325 ref XP_003354840.2    | PREDICTED: calcineurin subunit B type 1-like [Sus scrofa] >gi 335306878 ref XP_003125129.2  PREDICTED: calcineurin subunit B type 1-like [Sus scrofa]                                                                         | 0.823 | 0.982 | 0.989 | 1.117 |
| gi 311259157 ref XP_003127967.1    | PREDICTED: interferon-induced protein 44-like [Sus scrofa]                                                                                                                                                                    | 0.829 | 0.924 | 0.904 | 1.383 |
| gi 350586528 ref XP_003482207.1    | PREDICTED: butyrophilin-like protein 2 [Sus scrofa] >gi 350586524 ref XP_003482205.1  PREDICTED: butyrophilin-like protein 2-like [Sus scrofa]                                                                                | ---   | ---   | ---   | ---   |
| gi 1346657 sp P48762.1 SL9A1_PIG   | RecName: Full=Sodium/hydrogen exchanger 1; AltName: Full=Na(+)/H(+) exchanger 1; Short=NHE-1; AltName: Full=Solute carrier family 9 member 1 >gi 164596 gb AAA31092.1  Na <sup>+</sup> -H <sup>+</sup> exchanger [Sus scrofa] | ---   | ---   | ---   | ---   |
| gi 55741758 ref NP_001007104.1     | sodium/hydrogen exchanger 1 [Sus scrofa] >gi 240707 gb AAB20633.1  Na(+)-H <sup>+</sup> exchanger [Sus scrofa]                                                                                                                |       |       |       |       |
| gi 311264699 ref XP_003130289.1    | PREDICTED: mitochondrial-processing peptidase subunit beta [Sus scrofa]                                                                                                                                                       | ---   | ---   | ---   | ---   |
| gi 335308134 ref XP_003361114.1    | PREDICTED: mitochondrial-processing peptidase subunit beta-like [Sus scrofa]                                                                                                                                                  |       |       |       |       |
| gi 350583174 ref XP_001927278.4    | PREDICTED: acyl-protein thioesterase 1 [Sus scrofa]                                                                                                                                                                           | 2.18  | 0.982 | 0.968 | 1.35  |
| gi 110832818 sp Q29221.3 CAZA2_PIG | RecName: Full=F-actin-capping protein subunit alpha-2; AltName:                                                                                                                                                               | ---   | ---   | ---   | ---   |

|                                      |                                                                                                                                                                                                               |       |       |       |       |
|--------------------------------------|---------------------------------------------------------------------------------------------------------------------------------------------------------------------------------------------------------------|-------|-------|-------|-------|
|                                      | Full=CapZ<br>alpha-2 >gi 148613355 gb ABQ96221<br>.1  F-actin capping protein alpha 2<br>subunit [Sus<br>scrofa] >gi 38322751 gb AAR16302.<br>1  capping protein (actin filament)<br>muscle Z-line, alpha 2 [ |       |       |       |       |
| gi 350596747 ref XP_003484<br>313.1  | PREDICTED: F-actin-capping<br>protein subunit alpha-2-like [Sus<br>scrofa]                                                                                                                                    |       |       |       |       |
| gi 147903595 ref NP_001090<br>924.1  | F-actin-capping protein subunit<br>alpha-2 [Sus<br>scrofa] >gi 118627574 emb CAL6943<br>6.1  F-actin capping protein subunit<br>alpha 2 [Sus scrofa]                                                          |       |       |       |       |
| gi 350595294 ref XP_003134<br>809.3  | PREDICTED: F-actin-capping<br>protein subunit alpha-2-like [Sus<br>scrofa]                                                                                                                                    |       |       |       |       |
| gi 350591814 ref XP_003483<br>340.1  | PREDICTED: lipoma-preferred<br>partner-like [Sus scrofa]                                                                                                                                                      | 0.669 | 0.732 | 0.815 | 0.863 |
| gi 335290435 ref XP_003356<br>182.1  | PREDICTED: rho guanine nucleotide<br>exchange factor 16 [Sus scrofa]                                                                                                                                          | 1.187 | 0.883 | 0.642 | 1.232 |
| gi 311250341 ref XP_003124<br>106.1  | PREDICTED: transcription initiation<br>factor TFIID subunit 7 [Sus scrofa]                                                                                                                                    | 1.001 | 1.809 | 1.608 | 1.345 |
| gi 113205780 ref NP_001038<br>049.1  | quinone oxidoreductase [Sus<br>scrofa] >gi 104295137 gb ABF72038.<br>1  zeta-crystallin [Sus scrofa]                                                                                                          | ---   | ---   | ---   | ---   |
| gi 115502567 sp Q0MVN8.1 <br>QOR_PIG | RecName: Full=Quinone<br>oxidoreductase; AltName:<br>Full=NADPH:quinone reductase;<br>AltName:<br>Full=Zeta-crystallin >gi 111434264 g<br>b ABH10011.1  zeta-crystallin [Sus<br>scrofa]                       |       |       |       |       |
| gi 311249297 ref XP_003123<br>564.1  | PREDICTED: peptidyl-prolyl<br>cis-trans isomerase FKBP8 [Sus<br>scrofa]                                                                                                                                       | ---   | ---   | ---   | ---   |
| gi 339895863 ref NP_001229<br>960.1  | coiled-coil and C2 domain-containing<br>1A [Sus scrofa]                                                                                                                                                       | ---   | ---   | ---   | ---   |
| gi 311247589 ref XP_003122<br>716.1  | PREDICTED: coiled-coil<br>domain-containing protein 86-like<br>[Sus scrofa]                                                                                                                                   | ---   | ---   | ---   | ---   |
| gi 350594682 ref XP_003134           | PREDICTED: D-tyrosyl-tRNA(Tyr)                                                                                                                                                                                | ---   | ---   | ---   | ---   |

|                                     |                                                                                                                                                                                                                                                           |       |       |       |       |
|-------------------------------------|-----------------------------------------------------------------------------------------------------------------------------------------------------------------------------------------------------------------------------------------------------------|-------|-------|-------|-------|
| 325.3                               | deacylase 1-like [Sus scrofa]                                                                                                                                                                                                                             |       |       |       |       |
| gi 5739517 gb AAD50507.1 AF176246_1 | macrophage migration inhibitory factor, partial [Sus scrofa]                                                                                                                                                                                              | 0.505 | 0.499 | 0.353 | 0.26  |
| gi 262204902 dbj BAI48031.1         | macrophage migration inhibitory factor [Sus scrofa]                                                                                                                                                                                                       |       |       |       |       |
| gi 116175251 ref NP_001070681.1     | macrophage migration inhibitory factor [Sus scrofa] >gi 124075357 sp P80928.3 MIF_PIG RecName: Full=Macrophage migration inhibitory factor; Short=MIF; AltName: Full=Glycosylation-inhibiting factor; Short=GIF; AltName: Full=L-dopachrome isomerase; Al |       |       |       |       |
| gi 350594292 ref XP_003134012.3     | PREDICTED: superkiller viralicidic activity 2-like 2 isoform 1 [Sus scrofa]                                                                                                                                                                               | ---   | ---   | ---   | ---   |
| gi 350580668 ref XP_003123154.3     | PREDICTED: scaffold attachment factor B2 [Sus scrofa]                                                                                                                                                                                                     | ---   | ---   | ---   | ---   |
| gi 335310888 ref XP_003362240.1     | PREDICTED: importin subunit alpha-4-like, partial [Sus scrofa]                                                                                                                                                                                            | ---   | ---   | ---   | ---   |
| gi 345199331 ref NP_001230852.1     | CWC27 spliceosome-associated protein homolog [Sus scrofa]                                                                                                                                                                                                 | ---   | ---   | ---   | ---   |
| gi 350592457 ref XP_001929016.4     | PREDICTED: CAP-Gly domain-containing linker protein 1 [Sus scrofa]                                                                                                                                                                                        | 1.419 | 1.214 | 1.321 | 1.129 |
| gi 350579992 ref XP_003122608.3     | PREDICTED: EH domain binding protein 1-like 1 [Sus scrofa]                                                                                                                                                                                                | ---   | ---   | ---   | ---   |
| gi 356582360 ref NP_001239162.1     | ADP-ribosylation factor interacting protein 1 [Sus scrofa]                                                                                                                                                                                                | ---   | ---   | ---   | ---   |
| gi 194043071 ref XP_001928539.1     | PREDICTED: gatC-like protein-like [Sus scrofa]                                                                                                                                                                                                            | ---   | ---   | ---   | ---   |
| gi 227121291 gb ACP19336.1          | claudin 3 variant 1 [Sus scrofa]                                                                                                                                                                                                                          | ---   | ---   | ---   | ---   |
| gi 229892832 ref NP_001153547.1     | claudin-3 [Sus scrofa] >gi 227121293 gb ACP19337.1  claudin 3 variant 2 [Sus scrofa]                                                                                                                                                                      |       |       |       |       |
| gi 346986400 ref NP_001231351.1     | kunitz-type protease inhibitor 1 precursor [Sus scrofa]                                                                                                                                                                                                   | 0.573 | 0.736 | 0.762 | 0.681 |
| gi 350581652 ref XP_003354625.2     | PREDICTED: cytochrome b-c1 complex subunit 2, mitochondrial-like [Sus scrofa]                                                                                                                                                                             | ---   | ---   | ---   | ---   |

|                                 |                                                                                                                      |       |       |       |       |
|---------------------------------|----------------------------------------------------------------------------------------------------------------------|-------|-------|-------|-------|
| gi 350593477 ref XP_003483694.1 | PREDICTED: myosin-VIIb [Sus scrofa]                                                                                  | 0.821 | 0.831 | 1.173 | 0.709 |
| gi 335287187 ref XP_003355292.1 | PREDICTED: ATP synthase subunit b, mitochondrial [Sus scrofa]                                                        | ---   | ---   | ---   | ---   |
| gi 311275507 ref XP_003134773.1 | PREDICTED: neural Wiskott-Aldrich syndrome protein-like [Sus scrofa]                                                 | 0.716 | 0.861 | 0.847 | 0.958 |
| gi 350589312 ref XP_003130599.3 | PREDICTED: LOW QUALITY PROTEIN: protein ELYS-like [Sus scrofa]                                                       | ---   | ---   | ---   | ---   |
| gi 344259276 gb AEN03335.1      | proteasome subunit beta type 6 [Sus scrofa] >gi 344259274 gb AEN03334.1  proteasome subunit beta type 6 [Sus scrofa] | 2.594 | 0.743 | 1.107 | 0.517 |
| gi 346716138 ref NP_001138398.2 | proteasome subunit beta type-6 [Sus scrofa]                                                                          |       |       |       |       |
| gi 350592919 ref XP_001924466.4 | PREDICTED: neutral ceramidase [Sus scrofa]                                                                           | 0.821 | 1.269 | 1.808 | 1.064 |
| gi 311246780 ref XP_003122339.1 | PREDICTED: haloacid dehalogenase-like hydrolase domain-containing protein 2-like [Sus scrofa]                        | 0.868 | 1.466 | 1.718 | 1.043 |
| gi 350596685 ref XP_003361498.2 | PREDICTED: haloacid dehalogenase-like hydrolase domain-containing protein 2-like isoform 1 [Sus scrofa]              |       |       |       |       |
| gi 311273575 ref XP_003133933.1 | PREDICTED: NAD kinase domain-containing protein 1 isoform 1 [Sus scrofa]                                             | ---   | ---   | ---   | ---   |
| gi 335303800 ref XP_003359802.1 | PREDICTED: NAD kinase domain-containing protein 1 isoform 2 [Sus scrofa]                                             |       |       |       |       |
| gi 335286747 ref XP_001924678.3 | PREDICTED: hepatoma-derived growth factor-like [Sus scrofa]                                                          | 1.35  | 1.402 | 1.013 | 1.412 |
| gi 350594009 ref XP_003483813.1 | PREDICTED: PERQ amino acid-rich with GYF domain-containing protein 2-like, partial [Sus scrofa]                      | 0.465 | 0.784 | 0.856 | 0.665 |
| gi 311267458 ref XP_003131579.1 | PREDICTED: 39S ribosomal protein L10, mitochondrial-like [Sus scrofa]                                                | ---   | ---   | ---   | ---   |
| gi 335310432 ref XP_003362030.1 | PREDICTED: splicing factor 3B subunit 3-like [Sus scrofa]                                                            | 0.927 | 1.004 | 0.927 | 1.065 |
| gi 311269853 ref XP_003132      | PREDICTED: choline-phosphate                                                                                         | 0.689 | 0.563 | 0.584 | 0.844 |

|                                 |                                                                                                                                                             |       |       |       |       |
|---------------------------------|-------------------------------------------------------------------------------------------------------------------------------------------------------------|-------|-------|-------|-------|
| 661.1                           | cytidyltransferase A [Sus scrofa]                                                                                                                           |       |       |       |       |
| gi 311262619 ref XP_003129271.1 | PREDICTED: mitotic spindle assembly checkpoint protein MAD2A-like [Sus scrofa]                                                                              | ---   | ---   | ---   | ---   |
| gi 335307137 ref XP_003360720.1 | PREDICTED: BRISC and BRCA1-A complex member 1-like [Sus scrofa]                                                                                             | ---   | ---   | ---   | ---   |
| gi 335286799 ref XP_003355186.1 | PREDICTED: FAD synthase [Sus scrofa] >gi 335286797 ref XP_001929410.3  PREDICTED: FAD synthase isoform 1 [Sus scrofa]                                       | ---   | ---   | ---   | ---   |
| gi 264681454 ref NP_001161122.1 | S-adenosylmethionine synthase isoform type-2 [Sus scrofa] >gi 262204900 dbj BAI48030.1  methionine adenosyltransferase II alpha [Sus scrofa]                | ---   | ---   | ---   | ---   |
| gi 335297289 ref XP_003357996.1 | PREDICTED: septin-9-like [Sus scrofa]                                                                                                                       | ---   | ---   | ---   | ---   |
| gi 311276184 ref XP_003135086.1 | PREDICTED: FUN14 domain-containing protein 1-like [Sus scrofa]                                                                                              | 0.718 | 1.337 | 1.354 | 1.308 |
| gi 297307135 ref NP_001171998.1 | protein unc-45 homolog A [Sus scrofa]                                                                                                                       | ---   | ---   | ---   | ---   |
| gi 350582906 ref XP_001925367.4 | PREDICTED: gasdermin-C-like [Sus scrofa]                                                                                                                    | ---   | ---   | ---   | ---   |
| gi 298160958 ref NP_001177156.1 | NHP2 non-histone chromosome protein 2-like 1 [Sus scrofa] >gi 298160960 ref NP_001177155.1  NHP2 non-histone chromosome protein 2-like 1 [Sus scrofa]       | ---   | ---   | ---   | ---   |
| gi 335306662 ref XP_003360532.1 | PREDICTED: NHP2-like protein 1-like [Sus scrofa]                                                                                                            |       |       |       |       |
| gi 349732194 ref NP_001231852.1 | armadillo repeat containing 10 [Sus scrofa] >gi 350588904 ref XP_003482738.1  PREDICTED: armadillo repeat-containing protein 10-like isoform 1 [Sus scrofa] | ---   | ---   | ---   | ---   |
| gi 350588908 ref XP_003482740.1 | PREDICTED: armadillo repeat-containing protein 10-like isoform 3 [Sus scrofa]                                                                               |       |       |       |       |
| gi 350588906 ref XP_003482739.1 | PREDICTED: armadillo repeat-containing protein 10-like                                                                                                      |       |       |       |       |

|                                      |                                                                                                                                 |      |     |       |       |
|--------------------------------------|---------------------------------------------------------------------------------------------------------------------------------|------|-----|-------|-------|
|                                      | isoform 2 [Sus scrofa]                                                                                                          |      |     |       |       |
| gi 350588910 ref XP_003482741.1      | PREDICTED: armadillo repeat-containing protein 10-like isoform 4 [Sus scrofa]                                                   |      |     |       |       |
| gi 347300383 ref NP_001231485.1      | aminoacyl tRNA synthase complex-interacting multifunctional protein 2 isoform 1 [Sus scrofa]                                    | ---  | --- | ---   | ---   |
| gi 347300385 ref NP_001231486.1      | aminoacyl tRNA synthase complex-interacting multifunctional protein 2 isoform 2 [Sus scrofa]                                    |      |     |       |       |
| gi 311272660 ref XP_003133533.1      | PREDICTED: secernin-3-like [Sus scrofa]                                                                                         | ---  | --- | ---   | ---   |
| gi 343478220 ref NP_001230376.1      | eukaryotic translation initiation factor 4H 1 [Sus scrofa]                                                                      | ---  | --- | ---   | ---   |
| gi 343478222 ref NP_001230377.1      | eukaryotic translation initiation factor 4H 2 [Sus scrofa]                                                                      |      |     |       |       |
| gi 350597032 ref XP_001925921.4      | PREDICTED: aldehyde dehydrogenase family 1 member A3, partial [Sus scrofa]                                                      | 2.31 | 4.2 | 3.338 | 3.713 |
| gi 21703165 gb AAM76080.1 AF334742_1 | immunoglobulin kappa light chain VJ region [Sus scrofa]                                                                         | ---  | --- | ---   | ---   |
| gi 41323521 gb AAR99918.1            | immunoglobulin kappa variable region [Sus scrofa]                                                                               |      |     |       |       |
| gi 41323519 gb AAR99917.1            | immunoglobulin kappa variable region [Sus scrofa]                                                                               |      |     |       |       |
| gi 41323567 gb AAR99941.1            | immunoglobulin kappa variable region [Sus scrofa]                                                                               |      |     |       |       |
| gi 41323635 gb AAR99975.1            | immunoglobulin kappa variable region [Sus scrofa]                                                                               |      |     |       |       |
| gi 41323673 gb AAR99994.1            | immunoglobulin kappa variable region [Sus scrofa]                                                                               |      |     |       |       |
| gi 41323593 gb AAR99954.1            | immunoglobulin kappa variable region [Sus scrofa] >gi 41323525 gb AAR99920.1  immunoglobulin kappa variable region [Sus scrofa] |      |     |       |       |
| gi 41323677 gb AAR99996.1            | immunoglobulin kappa variable region [Sus scrofa]                                                                               |      |     |       |       |
| gi 41323583 gb AAR99949.1            | immunoglobulin kappa variable region [Sus scrofa]                                                                               |      |     |       |       |
| gi 41323535 gb AAR99925.1            | immunoglobulin kappa variable region [Sus scrofa]                                                                               |      |     |       |       |

|                           |                                                                                                                                                                                                                                                          |  |  |  |  |
|---------------------------|----------------------------------------------------------------------------------------------------------------------------------------------------------------------------------------------------------------------------------------------------------|--|--|--|--|
| gi 41323653 gb AAR99984.1 | immunoglobulin kappa variable region [Sus scrofa] >gi 41323645 gb AAR99980.1  immunoglobulin kappa variable region [Sus scrofa] >gi 41323561 gb AAR99938.1  immunoglobulin kappa variable region [Sus scrofa] >gi 41323557 gb AAR99936.1  immunoglobulin |  |  |  |  |
| gi 41323671 gb AAR99993.1 | immunoglobulin kappa variable region [Sus scrofa]                                                                                                                                                                                                        |  |  |  |  |
| gi 41323661 gb AAR99988.1 | immunoglobulin kappa variable region [Sus scrofa] >gi 41323597 gb AAR99956.1  immunoglobulin kappa variable region [Sus scrofa] >gi 41323553 gb AAR99934.1  immunoglobulin kappa variable region [Sus scrofa] >gi 41323541 gb AAR99928.1  immunoglobulin |  |  |  |  |
| gi 41323619 gb AAR99967.1 | immunoglobulin kappa variable region [Sus scrofa]                                                                                                                                                                                                        |  |  |  |  |
| gi 41323539 gb AAR99927.1 | immunoglobulin kappa variable region [Sus scrofa]                                                                                                                                                                                                        |  |  |  |  |
| gi 41323643 gb AAR99979.1 | immunoglobulin kappa variable region [Sus scrofa]                                                                                                                                                                                                        |  |  |  |  |
| gi 41323633 gb AAR99974.1 | immunoglobulin kappa variable region [Sus scrofa]                                                                                                                                                                                                        |  |  |  |  |
| gi 41323563 gb AAR99939.1 | immunoglobulin kappa variable region [Sus scrofa]                                                                                                                                                                                                        |  |  |  |  |
| gi 41323627 gb AAR99971.1 | immunoglobulin kappa variable region [Sus scrofa]                                                                                                                                                                                                        |  |  |  |  |
| gi 41323509 gb AAR99912.1 | immunoglobulin kappa variable region [Sus scrofa] >gi 41323551 gb AAR99933.1  immunoglobulin kappa variable region [Sus scrofa]                                                                                                                          |  |  |  |  |
| gi 41323665 gb AAR99990.1 | immunoglobulin kappa variable region [Sus scrofa]                                                                                                                                                                                                        |  |  |  |  |
| gi 41323629 gb AAR99972.1 | immunoglobulin kappa variable region [Sus scrofa]                                                                                                                                                                                                        |  |  |  |  |

|                           |                                                                                                                                                                                                                                                          |  |  |  |  |
|---------------------------|----------------------------------------------------------------------------------------------------------------------------------------------------------------------------------------------------------------------------------------------------------|--|--|--|--|
| gi 41323579 gb AAR99947.1 | immunoglobulin kappa variable region [Sus scrofa]                                                                                                                                                                                                        |  |  |  |  |
| gi 41323569 gb AAR99942.1 | immunoglobulin kappa variable region [Sus scrofa]                                                                                                                                                                                                        |  |  |  |  |
| gi 41323581 gb AAR99948.1 | immunoglobulin kappa variable region [Sus scrofa]                                                                                                                                                                                                        |  |  |  |  |
| gi 41323639 gb AAR99977.1 | immunoglobulin kappa variable region [Sus scrofa]                                                                                                                                                                                                        |  |  |  |  |
| gi 41323681 gb AAR99998.1 | immunoglobulin kappa variable region [Sus scrofa]                                                                                                                                                                                                        |  |  |  |  |
| gi 41323685 gb AAS00001.1 | immunoglobulin kappa variable region [Sus scrofa]                                                                                                                                                                                                        |  |  |  |  |
| gi 41323641 gb AAR99978.1 | immunoglobulin kappa variable region [Sus scrofa]                                                                                                                                                                                                        |  |  |  |  |
| gi 41323683 gb AAR99999.1 | immunoglobulin kappa variable region [Sus scrofa]                                                                                                                                                                                                        |  |  |  |  |
| gi 41323547 gb AAR99931.1 | immunoglobulin kappa variable region [Sus scrofa]                                                                                                                                                                                                        |  |  |  |  |
| gi 41323523 gb AAR99919.1 | immunoglobulin kappa variable region [Sus scrofa]                                                                                                                                                                                                        |  |  |  |  |
| gi 41323623 gb AAR99969.1 | immunoglobulin kappa variable region [Sus scrofa]                                                                                                                                                                                                        |  |  |  |  |
| gi 41323675 gb AAR99995.1 | immunoglobulin kappa variable region [Sus scrofa]                                                                                                                                                                                                        |  |  |  |  |
| gi 41323617 gb AAR99966.1 | immunoglobulin kappa variable region [Sus scrofa] >gi 41323533 gb AAR99924.1  immunoglobulin kappa variable region [Sus scrofa]                                                                                                                          |  |  |  |  |
| gi 41323621 gb AAR99968.1 | immunoglobulin kappa variable region [Sus scrofa] >gi 41323589 gb AAR99952.1  immunoglobulin kappa variable region [Sus scrofa] >gi 41323573 gb AAR99944.1  immunoglobulin kappa variable region [Sus scrofa] >gi 41323611 gb AAR99963.1  immunoglobulin |  |  |  |  |
| gi 41323655 gb AAR99985.1 | immunoglobulin kappa variable region [Sus scrofa] >gi 41323651 gb AAR99983.                                                                                                                                                                              |  |  |  |  |



|                                 |                                                                                                                                                                                                   |       |       |       |       |
|---------------------------------|---------------------------------------------------------------------------------------------------------------------------------------------------------------------------------------------------|-------|-------|-------|-------|
|                                 | 1  immunoglobulin kappa variable region [Sus scrofa]                                                                                                                                              |       |       |       |       |
| gi 41323565 gb AAR99940.1       | immunoglobulin kappa variable region [Sus scrofa]                                                                                                                                                 |       |       |       |       |
| gi 41323667 gb AAR99991.1       | immunoglobulin kappa variable region [Sus scrofa]                                                                                                                                                 |       |       |       |       |
| gi 350580067 ref XP_003122733.3 | PREDICTED: protein PAT1 homolog 1 [Sus scrofa]                                                                                                                                                    | ---   | ---   | ---   | ---   |
| gi 147906270 ref NP_001090905.1 | E3 ubiquitin-protein ligase XIAP [Sus scrofa] >gi 119567669 gb ABL84299.1  X-linked inhibitor of apoptosis [Sus scrofa]                                                                           | ---   | ---   | ---   | ---   |
| gi 311249593 ref XP_003123724.1 | PREDICTED: vesicular integral-membrane protein VIP36 [Sus scrofa]                                                                                                                                 | 0.559 | 0.214 | 0.214 | 0.626 |
| gi 270289750 ref NP_001161887.1 | non-specific lipid-transfer protein [Sus scrofa] >gi 262263195 dbj BAI48100.1  sterol carrier protein 2 [Sus scrofa]                                                                              | ---   | ---   | ---   | ---   |
| gi 335298382 ref XP_003358265.1 | PREDICTED: thioredoxin domain-containing protein 17-like isoform 2 [Sus scrofa] >gi 311268187 ref XP_003131925.1  PREDICTED: thioredoxin domain-containing protein 17-like isoform 1 [Sus scrofa] | ---   | ---   | ---   | ---   |
| gi 350584189 ref XP_003481688.1 | PREDICTED: phosphatidylinositol-5-phosphate 4-kinase type-2 gamma-like [Sus scrofa]                                                                                                               | ---   | ---   | ---   | ---   |
| gi 194042810 ref XP_001928060.1 | PREDICTED: serine/threonine-protein phosphatase 2B catalytic subunit beta isoform isoform 2 [Sus scrofa]                                                                                          | ---   | ---   | ---   | ---   |
| gi 326368169 emb CAZ65757.1     | protein phosphatase 3, catalytic subunit, beta isoform [Phacochoerus africanus]                                                                                                                   |       |       |       |       |
| gi 311271387 ref XP_001928050.2 | PREDICTED: serine/threonine-protein phosphatase 2B catalytic subunit beta isoform isoform 1 [Sus scrofa]                                                                                          |       |       |       |       |
| gi 326368171 emb CAZ6575        | protein phosphatase 3, catalytic                                                                                                                                                                  |       |       |       |       |

|                                     |                                                                                                                                                                                                                                                           |       |       |       |       |
|-------------------------------------|-----------------------------------------------------------------------------------------------------------------------------------------------------------------------------------------------------------------------------------------------------------|-------|-------|-------|-------|
| 8.1                                 | subunit, beta isoform [Babyrousa babyrussa]                                                                                                                                                                                                               |       |       |       |       |
| gi 326368167 emb CAZ6575<br>6.1     | protein phosphatase 3, catalytic subunit, beta isoform [Sus scrofa]                                                                                                                                                                                       |       |       |       |       |
| gi 147225127 emb CAN1325<br>5.1     | novel protein similar to butyrophilin family proteins [Sus scrofa]                                                                                                                                                                                        | 0.673 | 0.418 | 0.595 | 0.502 |
| gi 350586516 ref XP_003128<br>364.3 | PREDICTED: butyrophilin subfamily 1 member A1-like [Sus scrofa]                                                                                                                                                                                           |       |       |       |       |
| gi 147225163 emb CAN1330<br>3.1     | novel protein similar to butyrophilin family proteins [Sus scrofa]                                                                                                                                                                                        |       |       |       |       |
| gi 194035115 ref XP_001925<br>615.1 | PREDICTED: ubiquitin carboxyl-terminal hydrolase 45 [Sus scrofa]                                                                                                                                                                                          | 1.763 | ---   | ---   | 0.168 |
| gi 350591061 ref XP_003132<br>153.3 | PREDICTED: nuclease EXOG, mitochondrial [Sus scrofa]                                                                                                                                                                                                      | ---   | ---   | ---   | ---   |
| gi 194035837 ref XP_001928<br>904.1 | PREDICTED: peroxisomal biogenesis factor 19 isoform 1 [Sus scrofa]                                                                                                                                                                                        | ---   | ---   | ---   | ---   |
| gi 311254007 ref XP_003125<br>714.1 | PREDICTED: peroxisomal biogenesis factor 19 isoform 2 [Sus scrofa]                                                                                                                                                                                        |       |       |       |       |
| gi 148747288 ref NP_001092<br>072.1 | sideroflexin-1 [Sus scrofa] >gi 166977631 sp A5A761.1 SFXN1_PIG RecName: Full=Sideroflexin-1 >gi 146741302 dbj BAF62306.1  sideroflexin 1 [Sus scrofa]                                                                                                    | 0.951 | 0.642 | 0.587 | 0.663 |
| gi 166796069 ref NP_001107<br>760.1 | signal peptidase complex subunit 1 [Sus scrofa] >gi 187611464 sp B0FWK4.1 SPCS1_PIG RecName: Full=Signal peptidase complex subunit 1; AltName: Full=Microsomal signal peptidase 12 kDa subunit; Short=SPase 12 kDa subunit >gi 164598074 gb ABY61324.1  s | ---   | ---   | ---   | ---   |
| gi 311274550 ref XP_001924<br>843.2 | PREDICTED: 28S ribosomal protein S26, mitochondrial [Sus scrofa]                                                                                                                                                                                          | ---   | ---   | ---   | ---   |
| gi 350585199 ref XP_003355<br>972.2 | PREDICTED: rRNA 2~-O-methyltransferase fibrillar-like isoform 1 [Sus scrofa]                                                                                                                                                                              | 0.703 | 0.823 | 0.753 | 1.083 |

|                                  |                                                                                                                                                                                                                                                          |       |       |       |       |
|----------------------------------|----------------------------------------------------------------------------------------------------------------------------------------------------------------------------------------------------------------------------------------------------------|-------|-------|-------|-------|
| gi 350585201 ref XP_003481901.1  | PREDICTED: rRNA 2~-O-methyltransferase fibrillar-like isoform 2 [Sus scrofa]                                                                                                                                                                             |       |       |       |       |
| gi 47522616 ref NP_999102.1      | ubiquitin-like protein FUBI precursor [Sus scrofa] >gi 1628628 gb AAB52915.1  ubiquitin-like/S30 ribosomal fusion protein [Sus scrofa]                                                                                                                   | 0.111 | 0.123 | 0.101 | 0.111 |
| gi 51338624 sp P62863.1 RS30_PIG | RecName: Full=40S ribosomal protein S30                                                                                                                                                                                                                  |       |       |       |       |
| gi 350589515 ref XP_003482862.1  | PREDICTED: hypothetical protein LOC100738725 [Sus scrofa]                                                                                                                                                                                                |       |       |       |       |
| gi 75056777 sp Q8HZV3.1 TFR1_PIG | RecName: Full=Transferrin receptor protein 1; Short=TR; Short=TfR; Short=TfR1; Short=Trfr; AltName: CD_antigen=CD71 >gi 47522828 ref NP_999166.1  transferrin receptor protein 1 [Sus scrofa] >gi 22854661 gb AAN09749.1 AF416763_1 transferrin receptor | 0.648 | 0.447 | 0.379 | 0.547 |
| gi 298162731 gb ADI59732.1       | transferrin receptor protein [Sus scrofa]                                                                                                                                                                                                                |       |       |       |       |
| gi 311259609 ref XP_003128180.1  | PREDICTED: alpha-1B-glycoprotein-like [Sus scrofa]                                                                                                                                                                                                       | ---   | ---   | ---   | ---   |
| gi 350585516 ref XP_003356167.2  | PREDICTED: cyclin-dependent kinase 11 [Sus scrofa]                                                                                                                                                                                                       | ---   | ---   | ---   | ---   |
| gi 194042021 ref XP_001927084.1  | PREDICTED: programmed cell death protein 4 isoform 1 [Sus scrofa]                                                                                                                                                                                        | 2.4   | 0.92  | 0.975 | 1.571 |
| gi 335302236 ref XP_003359415.1  | PREDICTED: programmed cell death protein 4 isoform 2 [Sus scrofa]                                                                                                                                                                                        |       |       |       |       |
| gi 350586098 ref XP_003482113.1  | PREDICTED: PDZ domain-containing protein GIPC2-like isoform 2 [Sus scrofa]                                                                                                                                                                               | ---   | ---   | ---   | ---   |
| gi 350586100 ref XP_003356469.2  | PREDICTED: PDZ domain-containing protein GIPC2-like isoform 1 [Sus scrofa]                                                                                                                                                                               |       |       |       |       |
| gi 335297132 ref XP_003131142.2  | PREDICTED: cysteinyl-tRNA synthetase, mitochondrial-like [Sus scrofa]                                                                                                                                                                                    | ---   | ---   | ---   | ---   |
| gi 148724904 emb CAN87692.1      | RD RNA binding protein [Sus scrofa]                                                                                                                                                                                                                      | ---   | ---   | ---   | ---   |

|                                 |                                                                                                                                                           |       |       |       |       |
|---------------------------------|-----------------------------------------------------------------------------------------------------------------------------------------------------------|-------|-------|-------|-------|
| gi 156120154 ref NP_001095295.1 | negative elongation factor E [Sus scrofa] >gi 148724907 emb CAN87695.1  RD RNA binding protein [Sus scrofa]                                               |       |       |       |       |
| gi 148724908 emb CAN87696.1     | RD RNA binding protein [Sus scrofa]                                                                                                                       |       |       |       |       |
| gi 148724905 emb CAN87693.1     | RD RNA binding protein [Sus scrofa]                                                                                                                       |       |       |       |       |
| gi 148724906 emb CAN87694.1     | RD RNA binding protein [Sus scrofa]                                                                                                                       |       |       |       |       |
| gi 350579603 ref XP_003480647.1 | PREDICTED: ribosome-recycling factor, mitochondrial-like [Sus scrofa]                                                                                     | ---   | ---   | ---   | ---   |
| gi 350579605 ref XP_003122165.3 | PREDICTED: ribosome-recycling factor, mitochondrial-like isoform 2 [Sus scrofa]                                                                           |       |       |       |       |
| gi 345199333 ref NP_001230853.1 | SEC24 family, member A [Sus scrofa]                                                                                                                       | ---   | ---   | ---   | ---   |
| gi 194038534 ref XP_001929109.1 | PREDICTED: prostaglandin reductase 2 isoform 1 [Sus scrofa] >gi 311261328 ref XP_003128705.1  PREDICTED: prostaglandin reductase 2 isoform 2 [Sus scrofa] | ---   | ---   | ---   | ---   |
| gi 335288570 ref XP_003126608.2 | PREDICTED: NADH dehydrogenase [ubiquinone] 1 alpha subcomplex subunit 9, mitochondrial-like [Sus scrofa]                                                  | 1.076 | 0.863 | 0.648 | 0.825 |
| gi 305855162 ref NP_001182263.1 | ELAV-like protein 1 [Sus scrofa] >gi 285818484 gb ADC38915.1  ELAV (embryonic lethal, abnormal vision, Drosophila)-like 1 [Sus scrofa]                    | 0.766 | 0.611 | 0.609 | 0.783 |
| gi 346716187 ref NP_001231241.1 | WAS/WASL-interacting protein family member 2 [Sus scrofa]                                                                                                 | ---   | ---   | ---   | ---   |
| gi 47522624 ref NP_999098.1     | arylsulfatase A precursor [Sus scrofa] >gi 45686371 gb AAL58668.2 AF316108_1 arylsulfatase A [Sus scrofa]                                                 | ---   | ---   | ---   | ---   |
| gi 335281873 ref XP_003353914.1 | PREDICTED: 182 kDa tankyrase-1-binding protein [Sus scrofa]                                                                                               | 0.975 | 0.921 | 1.108 | 0.694 |
| gi 350586715 ref XP_001925      | PREDICTED: CD2-associated                                                                                                                                 | ---   | ---   | ---   | ---   |

|                                 |                                                                                                                                                                                                                           |       |       |       |       |
|---------------------------------|---------------------------------------------------------------------------------------------------------------------------------------------------------------------------------------------------------------------------|-------|-------|-------|-------|
| 766.4                           | protein-like, partial [Sus scrofa]                                                                                                                                                                                        |       |       |       |       |
| gi 343790936 ref NP_001230525.1 | KH domain containing, RNA binding, signal transduction associated 1 [Sus scrofa]                                                                                                                                          | ---   | ---   | ---   | ---   |
| gi 264681474 ref NP_001161108.1 | sterol-4-alpha-carboxylate 3-dehydrogenase, decarboxylating [Sus scrofa] >gi 262204910 dbj BAI48035.1  NAD(P) dependent steroid dehydrogenase-like [Sus scrofa]                                                           | ---   | ---   | ---   | ---   |
| gi 194042179 ref XP_001929427.1 | PREDICTED: 40S ribosomal protein S24 isoform 4 [Sus scrofa]                                                                                                                                                               | ---   | ---   | ---   | ---   |
| gi 335301826 ref XP_003359293.1 | PREDICTED: 40S ribosomal protein S24 [Sus scrofa] >gi 335301828 ref XP_003359294.1  PREDICTED: 40S ribosomal protein S24 [Sus scrofa] >gi 335301824 ref XP_003359292.1  PREDICTED: 40S ribosomal protein S24 [Sus scrofa] |       |       |       |       |
| gi 311271421 ref XP_001929422.2 | PREDICTED: 40S ribosomal protein S24 isoform 3 [Sus scrofa] >gi 194042181 ref XP_001929415.1  PREDICTED: 40S ribosomal protein S24 isoform 1 [Sus scrofa]                                                                 |       |       |       |       |
| gi 335306028 ref XP_003360371.1 | PREDICTED: 40S ribosomal protein S24-like [Sus scrofa]                                                                                                                                                                    |       |       |       |       |
| gi 335301836 ref XP_003359297.1 | PREDICTED: 40S ribosomal protein S24 [Sus scrofa] >gi 311271423 ref XP_001929420.2  PREDICTED: 40S ribosomal protein S24 isoform 2 [Sus scrofa]                                                                           |       |       |       |       |
| gi 335301831 ref XP_003359295.1 | PREDICTED: 40S ribosomal protein S24 [Sus scrofa]                                                                                                                                                                         |       |       |       |       |
| gi 311273577 ref XP_003133934.1 | PREDICTED: 40S ribosomal protein S24-like [Sus scrofa]                                                                                                                                                                    |       |       |       |       |
| gi 227430316 ref NP_001153064.1 | cytochrome b5 type B [Sus scrofa]                                                                                                                                                                                         | ---   | ---   | ---   | ---   |
| gi 311266655 ref XP_003131200.1 | PREDICTED: charged multivesicular body protein 6-like [Sus scrofa]                                                                                                                                                        | ---   | ---   | ---   | ---   |
| gi 335299053 ref XP_003132249.2 | PREDICTED: inosine-5~-monophosphate dehydrogenase 2-like isoform 1 [Sus                                                                                                                                                   | 2.258 | 1.474 | 1.885 | 1.826 |

|                                 |                                                                                                                                                                                                                                                                                              |       |       |       |       |
|---------------------------------|----------------------------------------------------------------------------------------------------------------------------------------------------------------------------------------------------------------------------------------------------------------------------------------------|-------|-------|-------|-------|
|                                 | scrofa]                                                                                                                                                                                                                                                                                      |       |       |       |       |
| gi 335299055 ref XP_003358476.1 | PREDICTED:<br>inosine-5~-monophosphate<br>dehydrogenase 2-like isoform 2 [Sus<br>scrofa]                                                                                                                                                                                                     |       |       |       |       |
| gi 335297344 ref XP_003131243.2 | PREDICTED: integrin beta-4-like<br>[Sus scrofa]                                                                                                                                                                                                                                              | 0.73  | 1.151 | 1.519 | 1.199 |
| gi 335282293 ref XP_003354026.1 | PREDICTED: UPF0449 protein<br>C19orf25 homolog [Sus scrofa]                                                                                                                                                                                                                                  | ---   | ---   | ---   | ---   |
| gi 346421411 ref NP_001231080.1 | proteasome (prosome, macropain)<br>26S subunit, ATPase, 1 [Sus scrofa]                                                                                                                                                                                                                       | ---   | ---   | ---   | ---   |
| gi 335290010 ref XP_003127394.2 | PREDICTED: splicing factor,<br>arginine/serine-rich 19 [Sus scrofa]                                                                                                                                                                                                                          | 0.441 | 0.39  | 0.467 | 0.395 |
| gi 350579829 ref XP_003480693.1 | PREDICTED: LOW QUALITY<br>PROTEIN: cysteinyl-tRNA<br>synthetase, cytoplasmic-like [Sus<br>scrofa]                                                                                                                                                                                            | ---   | ---   | ---   | ---   |
| gi 350592384 ref XP_001927025.4 | PREDICTED: golgin subfamily A<br>member 3 [Sus scrofa]                                                                                                                                                                                                                                       | ---   | ---   | ---   | ---   |
| gi 350597062 ref XP_003362000.2 | PREDICTED: golgin subfamily A<br>member 3-like, partial [Sus scrofa]                                                                                                                                                                                                                         |       |       |       |       |
| gi 335300274 ref XP_003132696.2 | PREDICTED: hematopoietic lineage<br>cell-specific protein [Sus scrofa]                                                                                                                                                                                                                       | ---   | ---   | ---   | ---   |
| gi 311256155 ref XP_003126523.1 | PREDICTED: DNA-binding protein<br>A-like isoform 1 [Sus scrofa]                                                                                                                                                                                                                              | ---   | ---   | ---   | ---   |
| gi 335288453 ref XP_003355623.1 | PREDICTED: DNA-binding protein<br>A-like isoform 2 [Sus scrofa]                                                                                                                                                                                                                              |       |       |       |       |
| gi 350578568 ref XP_003480395.1 | PREDICTED:<br>beta-1,3-galactosyl-O-glycosyl-glyco<br>protein<br>beta-1,6-N-acetylglucosaminyltransfe<br>rase 3-like [Sus<br>scrofa] >gi 350578566 ref XP_00312<br>1521.3  PREDICTED:<br>beta-1,3-galactosyl-O-glycosyl-glyco<br>protein<br>beta-1,6-N-acetylglucosaminyltransfe<br>rase 3-l | ---   | ---   | ---   | ---   |
| gi 343403767 ref NP_001230312.1 | solute carrier family 46, member 1<br>[Sus scrofa]                                                                                                                                                                                                                                           | ---   | ---   | ---   | ---   |
| gi 350590667 ref XP_003483116.1 | PREDICTED: proton-coupled folate<br>transporter-like [Sus scrofa]                                                                                                                                                                                                                            |       |       |       |       |

|                                   |                                                                                                                                                                                                                                                           |       |       |       |       |
|-----------------------------------|-----------------------------------------------------------------------------------------------------------------------------------------------------------------------------------------------------------------------------------------------------------|-------|-------|-------|-------|
| gi 116175263 ref NP_001070687.1   | ubiquitin-conjugating enzyme E2 J1 [Sus scrofa] >gi 115371729 gb ABI96189.1  UB2J1 [Sus scrofa]                                                                                                                                                           | ---   | ---   | ---   | ---   |
| gi 350579496 ref XP_003353657.2   | PREDICTED: proteasome-associated protein ECM29 homolog [Sus scrofa]                                                                                                                                                                                       | 1.214 | 1.076 | 1.216 | 1.332 |
| gi 194474050 ref NP_001124003.1   | disintegrin and metalloproteinase domain-containing protein 10 precursor [Sus scrofa] >gi 190610714 gb ACE80208.1  disintegrin and metalloproteinase domain 10 [Sus scrofa]                                                                               | ---   | ---   | ---   | ---   |
| gi 350581743 ref XP_003481100.1   | PREDICTED: phosphomannomutase 2-like, partial [Sus scrofa]                                                                                                                                                                                                | ---   | ---   | ---   | ---   |
| gi 3023900 sp P79382.3 MGS T1_PIG | RecName: Full=Microsomal glutathione S-transferase 1; Short=Microsomal GST-1; AltName: Full=Microsomal GST-I >gi 47523668 ref NP_999465.1  microsomal glutathione S-transferase 1 [Sus scrofa] >gi 1840393 dbj BAA19201.1  glutathione S-transferase [Sus | ---   | ---   | ---   | ---   |
| gi 350583937 ref XP_003355432.2   | PREDICTED: LIM domain and actin-binding protein 1-like [Sus scrofa]                                                                                                                                                                                       | ---   | ---   | ---   | ---   |
| gi 350584488 ref XP_003126654.3   | PREDICTED: kinesin family member 21A [Sus scrofa]                                                                                                                                                                                                         | ---   | ---   | ---   | ---   |
| gi 350595170 ref XP_003484054.1   | PREDICTED: UPF0562 protein C7orf55 homolog [Sus scrofa]                                                                                                                                                                                                   | ---   | ---   | ---   | ---   |
| gi 350595172 ref XP_003484055.1   | PREDICTED: UPF0562 protein C7orf55 homolog [Sus scrofa]                                                                                                                                                                                                   |       |       |       |       |
| gi 350595174 ref XP_003484056.1   | PREDICTED: UPF0562 protein C7orf55 homolog [Sus scrofa]                                                                                                                                                                                                   |       |       |       |       |
| gi 335310367 ref XP_003361999.1   | PREDICTED: heterogeneous nuclear ribonucleoprotein H2-like [Sus scrofa]                                                                                                                                                                                   | 0.699 | 0.928 | 0.744 | 0.843 |
| gi 194036098 ref XP_001929432.1   | PREDICTED: SHC-transforming protein 1 isoform 1 [Sus scrofa]                                                                                                                                                                                              | ---   | ---   | ---   | ---   |
| gi 335286795 ref XP_003355185.1   | PREDICTED: SHC-transforming protein 1 [Sus scrofa]                                                                                                                                                                                                        |       |       |       |       |
| gi 3913338 sp O46658.3 CP2        | RecName: Full=Vitamin D(3)                                                                                                                                                                                                                                | ---   | ---   | ---   | ---   |

|                                      |                                                                                                                                                                                                                                |       |       |       |       |
|--------------------------------------|--------------------------------------------------------------------------------------------------------------------------------------------------------------------------------------------------------------------------------|-------|-------|-------|-------|
| DP_PIG                               | 25-hydroxylase; AltName: Full=CYP11D25; AltName: Full=Cytochrome P450 2D25 >gi 47523842 ref NP_999559.1  vitamin D(3) 25-hydroxylase [Sus scrofa] >gi 2956688 emb CAA76205.1  vitamin D3 25-Hydroxylase (CYP2D25) [Sus scrofa] |       |       |       |       |
| gi 94490432 gb ABF29435.1            | cytochrome P450 family 2 subfamily D polypeptide 6 [Sus scrofa]                                                                                                                                                                |       |       |       |       |
| gi 10179958 gb AAG13962.1            | vitamin D-25-hydroxylase [Sus scrofa]                                                                                                                                                                                          |       |       |       |       |
| gi 47523696 ref NP_999480.1          | hormone-sensitive lipase [Sus scrofa] >gi 2764520 emb CAA04121.1  Hormone-sensitive lipase [Sus scrofa] >gi 3169109 emb CAA04122.1  hormone-sensitive lipase [Sus scrofa]                                                      | ---   | ---   | ---   | ---   |
| gi 302372518 gb ADL28431.1           | hormone-sensitive lipase [Sus scrofa]                                                                                                                                                                                          |       |       |       |       |
| gi 75071455 sp Q68J42.1 LIPS_PIG     | RecName: Full=Hormone-sensitive lipase; Short=HSL >gi 51101229 gb AAT95417.1  hormone-sensitive lipase [Sus scrofa]                                                                                                            |       |       |       |       |
| gi 51101227 gb AAT95416.1            | hormone-sensitive lipase [Sus scrofa]                                                                                                                                                                                          |       |       |       |       |
| gi 345110630 ref NP_001230796.1      | RuvB-like 2 [Sus scrofa]                                                                                                                                                                                                       | 1.554 | 0.962 | 0.722 | 1.409 |
| gi 335296521 ref XP_003130802.2      | PREDICTED: acyl-CoA-binding domain-containing protein 5 [Sus scrofa]                                                                                                                                                           | ---   | ---   | ---   | ---   |
| gi 350586271 ref XP_003482146.1      | PREDICTED: E3 ubiquitin-protein ligase HECTD3-like, partial [Sus scrofa]                                                                                                                                                       | ---   | ---   | ---   | ---   |
| gi 343478171 ref NP_001230355.1      | small nuclear ribonucleoprotein Sm D3 [Sus scrofa]                                                                                                                                                                             | 0.583 | 0.802 | 0.423 | 0.689 |
| gi 16798651 gb AAL29467.1 AF435591_1 | ribosomal protein L19 [Sus scrofa]                                                                                                                                                                                             | ---   | ---   | ---   | ---   |
| gi 311267438 ref XP_003131557.1      | PREDICTED: 60S ribosomal protein L19 [Sus scrofa]                                                                                                                                                                              |       |       |       |       |
| gi 347300387 ref NP_001231487.1      | 60S ribosomal protein L17 [Sus scrofa]                                                                                                                                                                                         | 0.669 | 0.697 | 0.429 | 0.549 |



|                                  |                                                                                                                                                                                                                                                           |       |       |       |       |
|----------------------------------|-----------------------------------------------------------------------------------------------------------------------------------------------------------------------------------------------------------------------------------------------------------|-------|-------|-------|-------|
| gi 1839536 gb AAB47145.1         | dipeptidyl peptidase II, DPP II, dipeptidyl aminopeptidase II {N-terminal} [swine, seminal plasma, Peptide Partial, 41 aa] >gi 1881845 gb AAB49532.1  dipeptidyl-peptidase II, DPP II {N-terminal} {EC 3.4.14.2} [swine, seminal plasma, Peptide Partial, | ---   | ---   | ---   | ---   |
| gi 157427709 ref NP_001098761.1  | leucyl-cystinyl aminopeptidase [Sus scrofa] >gi 156763828 emb CAC84519.1  insulin-regulated aminopeptidase [Sus scrofa] >gi 156778063 emb CAC88117.1  insulin-regulated aminopeptidase [Sus scrofa]                                                       | ---   | ---   | ---   | ---   |
| gi 195562223 gb ACG50182.1       | actin related protein 2/3 complex subunit 2 [Sus scrofa]                                                                                                                                                                                                  | 1.277 | 0.509 | 0.891 | 1.037 |
| gi 298160991 ref NP_001177168.1  | actin-related protein 2/3 complex subunit 2 [Sus scrofa]                                                                                                                                                                                                  |       |       |       |       |
| gi 350582201 ref XP_003125018.3  | PREDICTED: hypothetical protein LOC100524080 [Sus scrofa]                                                                                                                                                                                                 | ---   | ---   | ---   | ---   |
| gi 350579136 ref XP_003480530.1  | PREDICTED: protein phosphatase 1A-like [Sus scrofa]                                                                                                                                                                                                       | 0.838 | 0.943 | 1.301 | 0.886 |
| gi 335284548 ref XP_003354635.1  | PREDICTED: transmembrane channel-like 5 [Sus scrofa]                                                                                                                                                                                                      | ---   | ---   | ---   | ---   |
| gi 311248055 ref XP_003122952.1  | PREDICTED: protein lin-7 homolog C-like [Sus scrofa]                                                                                                                                                                                                      | 0.802 | 0.753 | 0.669 | 0.898 |
| gi 350584725 ref XP_003126793.3  | PREDICTED: protein lin-7 homolog A-like [Sus scrofa]                                                                                                                                                                                                      |       |       |       |       |
| gi 346644810 ref NP_001231161.1  | protein lin-7 homolog B [Sus scrofa]                                                                                                                                                                                                                      |       |       |       |       |
| gi 350578494 ref XP_003480379.1  | PREDICTED: methyl-CpG-binding domain protein 2-like, partial [Sus scrofa]                                                                                                                                                                                 | ---   | ---   | ---   | ---   |
| gi 343478269 ref NP_001230399.1  | RNA 3'-terminal phosphate cyclase [Sus scrofa]                                                                                                                                                                                                            | ---   | ---   | ---   | ---   |
| gi 223509 prf 0810207A           | glucagon 37                                                                                                                                                                                                                                               | ---   | ---   | ---   | ---   |
| gi 279613 pir GCPG               | glucagon precursor - pig (fragment)                                                                                                                                                                                                                       |       |       |       |       |
| gi 46397418 sp P01274.4 GLUC_PIG | RecName: Full=Glucagon; Contains: RecName: Full=Glicentin; Contains: RecName: Full=Glicentin-related polypeptide; Short=GRPP; Contains:                                                                                                                   |       |       |       |       |

|                                 |                                                                                                                                                                                                                                                            |       |      |       |       |
|---------------------------------|------------------------------------------------------------------------------------------------------------------------------------------------------------------------------------------------------------------------------------------------------------|-------|------|-------|-------|
|                                 | RecName: Full=Oxyntomodulin;<br>Short=OXM; Short=OXY; Contains:<br>RecName: Full=Glucagon; Contains:<br>RecName: Full=Gluc                                                                                                                                 |       |      |       |       |
| gi 509403 emb CAA84355.1        | BAT1 [Sus scrofa]                                                                                                                                                                                                                                          | ---   | ---  | ---   | ---   |
| gi 55742824 ref NP_001005157.1  | spliceosome RNA helicase DDX39B [Sus scrofa] >gi 47117788 sp Q29024.2 DDX39B_PIG RecName: Full=Spliceosome RNA helicase DDX39B; AltName: Full=56 kDa U2AF65-associated protein; AltName: Full=DEAD box protein UAP56 >gi 162138207 gb ABX82809.1  HLA-B-as |       |      |       |       |
| gi 350582986 ref XP_001925424.4 | PREDICTED: eukaryotic translation initiation factor 3 subunit E [Sus scrofa]                                                                                                                                                                               | ---   | ---  | ---   | ---   |
| gi 350529421 ref NP_001231942.1 | mitochondrial ribosomal protein L49 [Sus scrofa]                                                                                                                                                                                                           | ---   | ---  | ---   | ---   |
| gi 311250199 ref XP_003124018.1 | PREDICTED: heterogeneous nuclear ribonucleoprotein A0-like [Sus scrofa]                                                                                                                                                                                    | ---   | ---  | ---   | ---   |
| gi 335298275 ref XP_003131863.2 | PREDICTED: glyoxalase domain-containing protein 4-like [Sus scrofa]                                                                                                                                                                                        | 1.799 | 1.22 | 1.084 | 1.553 |
| gi 335310707 ref XP_003362158.1 | PREDICTED: 39S ribosomal protein L37, mitochondrial-like, partial [Sus scrofa]                                                                                                                                                                             | ---   | ---  | ---   | ---   |
| gi 335286179 ref XP_003125563.2 | PREDICTED: eukaryotic translation initiation factor 3 subunit H-like isoform 1 [Sus scrofa] >gi 335286181 ref XP_003355036.1  PREDICTED: eukaryotic translation initiation factor 3 subunit H-like isoform 2 [Sus scrofa]                                  | ---   | ---  | ---   | ---   |
| gi 311251198 ref XP_003124496.1 | PREDICTED: coiled-coil-helix-coiled-coil-helix domain-containing protein 2, mitochondrial-like [Sus scrofa]                                                                                                                                                | ---   | ---  | ---   | ---   |
| gi 311273437 ref XP_003133863.1 | PREDICTED: coiled-coil-helix-coiled-coil-helix domain-containing protein 2,                                                                                                                                                                                |       |      |       |       |

|                                   |                                                                                                                                                                                                             |       |       |       |      |
|-----------------------------------|-------------------------------------------------------------------------------------------------------------------------------------------------------------------------------------------------------------|-------|-------|-------|------|
|                                   | mitochondrial-like [Sus scrofa]                                                                                                                                                                             |       |       |       |      |
| gi 311262316 ref XP_003129121.1   | PREDICTED: mps one binder kinase activator-like 1A-like [Sus scrofa]                                                                                                                                        | ---   | ---   | ---   | ---  |
| gi 350582248 ref XP_003481231.1   | PREDICTED: mps one binder kinase activator-like 1B-like [Sus scrofa]                                                                                                                                        |       |       |       |      |
| gi 350581864 ref XP_003481142.1   | PREDICTED: protein disulfide-isomerase A2-like [Sus scrofa]                                                                                                                                                 | 0.828 | 0.529 | 0.616 | 0.75 |
| gi 194042794 ref XP_001925861.1   | PREDICTED: calcium uniporter protein, mitochondrial [Sus scrofa]                                                                                                                                            | ---   | ---   | ---   | ---  |
| gi 311245746 ref XP_001925192.2   | PREDICTED: endophilin-A1-like [Sus scrofa]                                                                                                                                                                  | ---   | ---   | ---   | ---  |
| gi 350583507 ref XP_003481532.1   | PREDICTED: cold shock domain-containing protein E1-like [Sus scrofa]                                                                                                                                        | ---   | ---   | ---   | ---  |
| gi 75065380 sp Q8MJ49.1 OSTF1_PIG | RecName: Full=Osteoclast-stimulating factor 1 >gi 47522836 ref NP_999170.1  osteoclast-stimulating factor 1 [Sus scrofa] >gi 21930129 gb AAM82161.1 AF523268_1 osteoclast stimulating factor [Sus scrofa]   | ---   | ---   | ---   | ---  |
| gi 350590012 ref XP_003482975.1   | PREDICTED: FERM, RhoGEF and pleckstrin domain-containing protein 1 [Sus scrofa]                                                                                                                             | ---   | ---   | ---   | ---  |
| gi 350596332 ref XP_003361056.2   | PREDICTED: FERM, RhoGEF and pleckstrin domain-containing protein 1-like, partial [Sus scrofa]                                                                                                               |       |       |       |      |
| gi 350580442 ref XP_003123420.3   | PREDICTED: trans-2,3-enoyl-CoA reductase-like [Sus scrofa]                                                                                                                                                  | ---   | ---   | ---   | ---  |
| gi 349732216 ref NP_001231858.1   | maspardin [Sus scrofa]                                                                                                                                                                                      | ---   | ---   | ---   | ---  |
| gi 350578512 ref XP_003353370.2   | PREDICTED: maspardin-like [Sus scrofa]                                                                                                                                                                      |       |       |       |      |
| gi 350581893 ref XP_003481146.1   | PREDICTED: RNA-binding protein with serine-rich domain 1-like isoform 1 [Sus scrofa] >gi 350581895 ref XP_003481147.1  PREDICTED: RNA-binding protein with serine-rich domain 1-like isoform 2 [Sus scrofa] | ---   | ---   | ---   | ---  |
| gi 220900279 gb ACL82340.         | galectin-related protein [Sus scrofa]                                                                                                                                                                       | ---   | ---   | ---   | ---  |

|                                      |                                                                                                                                                                         |       |       |       |     |
|--------------------------------------|-------------------------------------------------------------------------------------------------------------------------------------------------------------------------|-------|-------|-------|-----|
| 1                                    |                                                                                                                                                                         |       |       |       |     |
| gi 350582342 ref XP_003481250.1      | PREDICTED: galectin-related protein A [Sus scrofa]                                                                                                                      |       |       |       |     |
| gi 350596839 ref XP_003484324.1      | PREDICTED: galectin-related protein A-like [Sus scrofa]                                                                                                                 |       |       |       |     |
| gi 350582694 ref XP_003481333.1      | PREDICTED: ATP-dependent RNA helicase DDX1-like [Sus scrofa]                                                                                                            | ---   | ---   | ---   | --- |
| gi 311248402 ref XP_003123126.1      | PREDICTED: hepatoma-derived growth factor-related protein 2-like [Sus scrofa]                                                                                           | ---   | ---   | ---   | --- |
| gi 54039371 sp P62272.3 RS18_PIG     | RecName: Full=40S ribosomal protein S18 >gi 47522714 ref NP_999105.1  40S ribosomal protein S18 [Sus scrofa] >gi 1841304 dbj BAA19211.1  ribosomal protein [Sus scrofa] | 0.629 | 0.226 | 0.178 | 0.7 |
| gi 194038457 ref XP_001928802.1      | PREDICTED: retinol dehydrogenase 11 [Sus scrofa]                                                                                                                        | ---   | ---   | ---   | --- |
| gi 350581931 ref XP_003354725.2      | PREDICTED: isoleucyl-tRNA synthetase, cytoplasmic-like [Sus scrofa]                                                                                                     | ---   | ---   | ---   | --- |
| gi 350581941 ref XP_003354723.2      | PREDICTED: isoleucyl-tRNA synthetase, cytoplasmic-like [Sus scrofa]                                                                                                     |       |       |       |     |
| gi 147832430 emb CAN59682.1          | HLA-B associated transcript 2 [Sus scrofa]                                                                                                                              | ---   | ---   | ---   | --- |
| gi 167908789 ref NP_001108147.1      | HLA-B associated transcript 2 [Sus scrofa] >gi 158537754 gb ABW73319.1  HLA-B associated transcript 2 [Sus scrofa]                                                      |       |       |       |     |
| gi 311250094 ref XP_003123955.1      | PREDICTED: histidine triad nucleotide-binding protein 1-like [Sus scrofa]                                                                                               | 0.766 | 1.029 | 0.941 | 0.7 |
| gi 119416776 emb CAL92193.1          | elongation initiation factor 4E [Sus scrofa]                                                                                                                            | ---   | ---   | ---   | --- |
| gi 311262801 ref XP_003129362.1      | PREDICTED: eukaryotic translation initiation factor 4E [Sus scrofa]                                                                                                     |       |       |       |     |
| gi 21703161 gb AAM76078.1 AF334740_1 | immunoglobulin kappa light chain VJ region [Sus scrofa]                                                                                                                 | ---   | ---   | ---   | --- |
| gi 41323513 gb AAR99914.1            | immunoglobulin kappa variable region [Sus scrofa]                                                                                                                       |       |       |       |     |
| gi 41323531 gb AAR99923.1            | immunoglobulin kappa variable                                                                                                                                           |       |       |       |     |

|                                   |                                                                                                                                                                                                                                                           |       |        |       |        |
|-----------------------------------|-----------------------------------------------------------------------------------------------------------------------------------------------------------------------------------------------------------------------------------------------------------|-------|--------|-------|--------|
|                                   | region [Sus scrofa]                                                                                                                                                                                                                                       |       |        |       |        |
| gi 345199326 ref NP_001230850.1   | sperm associated antigen 7 [Sus scrofa]                                                                                                                                                                                                                   | ---   | ---    | ---   | ---    |
| gi 343432672 ref NP_001230350.1   | carbohydrate kinase domain-containing protein isoform 1 [Sus scrofa]                                                                                                                                                                                      | 1.276 | 1.35   | 0.875 | 0.768  |
| gi 343432674 ref NP_001230351.1   | carbohydrate kinase domain-containing protein isoform 2 [Sus scrofa]                                                                                                                                                                                      |       |        |       |        |
| gi 350578316 ref XP_003121377.3   | PREDICTED: absent in melanoma 1 protein [Sus scrofa]                                                                                                                                                                                                      | 1.747 | 1.189  | 1.311 | 1.295  |
| gi 223950631 ref NP_001138859.1   | guanine nucleotide-binding protein G(I)/G(S)/G(O) subunit gamma-12 [Sus scrofa] >gi 166915512 gb ABZ03970.1  guanine nucleotide-binding protein gamma 12 subunit [Sus scrofa]                                                                             | 0.982 | 0.646  | 1.014 | 0.841  |
| gi 194039313 ref XP_001929257.1   | PREDICTED: kinesin light chain 4 [Sus scrofa]                                                                                                                                                                                                             | 0.607 | 0.471  | 0.544 | 0.599  |
| gi 311255064 ref XP_003126064.1   | PREDICTED: mitochondrial import receptor subunit TOM22 homolog [Sus scrofa]                                                                                                                                                                               | 0.746 | 0.648  | 0.642 | 0.877  |
| gi 171948776 gb ACB59245.1        | cathepsin B [Sus scrofa]                                                                                                                                                                                                                                  | 6.941 | 11.882 | 9.941 | 13.412 |
| gi 187470655 sp A1E295.1 CATB_PIG | RecName: Full=Cathepsin B; Contains: RecName: Full=Cathepsin B light chain; Contains: RecName: Full=Cathepsin B heavy chain; Flags: Precursor >gi 147906534 ref NP_001090927.1  cathepsin B precursor [Sus scrofa] >gi 118490058 gb ABK96810.1  cathepsin |       |        |       |        |
| gi 350591026 ref XP_003132136.3   | PREDICTED: dolichyl-diphosphooligosaccharide--p protein glycosyltransferase subunit STT3B [Sus scrofa]                                                                                                                                                    | ---   | ---    | ---   | ---    |
| gi 335299677 ref XP_003358644.1   | PREDICTED: U2 snRNP-associated SURP motif-containing protein [Sus scrofa]                                                                                                                                                                                 | ---   | ---    | ---   | ---    |
| gi 194018716 ref NP_001123450.1   | cytochrome b-c1 complex subunit 9 [Sus scrofa] >gi 87047640 gb ABD18453.1  ubiquinol-cytochrome c reductase                                                                                                                                               | ---   | ---    | ---   | ---    |

|                                 |                                                                                                                                                       |       |       |       |       |
|---------------------------------|-------------------------------------------------------------------------------------------------------------------------------------------------------|-------|-------|-------|-------|
|                                 | complex [Sus scrofa]                                                                                                                                  |       |       |       |       |
| gi 47575891 ref NP_001001260.1  | peptidoglycan recognition protein 1 precursor [Sus scrofa] >gi 47028067 gb AAT09052.1  peptidoglycan recognition protein short isoform 1 [Sus scrofa] | ---   | ---   | ---   | ---   |
| gi 350585327 ref XP_003356027.2 | PREDICTED: peptidoglycan recognition protein 1-like [Sus scrofa]                                                                                      |       |       |       |       |
| gi 343432658 ref NP_001230343.1 | protein phosphatase 1, regulatory (inhibitor) subunit 8 [Sus scrofa]                                                                                  | ---   | ---   | ---   | ---   |
| gi 350591508 ref XP_003483287.1 | PREDICTED: DNA replication licensing factor MCM2 [Sus scrofa]                                                                                         | ---   | ---   | ---   | ---   |
| gi 194035343 ref XP_001928597.1 | PREDICTED: heme-binding protein 2 [Sus scrofa]                                                                                                        | ---   | ---   | ---   | ---   |
| gi 350580713 ref XP_003480884.1 | PREDICTED: hypothetical protein LOC100737370 [Sus scrofa]                                                                                             | ---   | ---   | ---   | ---   |
| gi 311275781 ref XP_003134908.1 | PREDICTED: drebrin-like protein-like [Sus scrofa]                                                                                                     | ---   | ---   | ---   | ---   |
| gi 264681458 ref NP_001161123.1 | 2-acylglycerol O-acyltransferase 2 [Sus scrofa] >gi 262204904 dbj BAI48032.1  monoacylglycerol O-acyltransferase 2 [Sus scrofa]                       | 0.608 | 0.314 | 0.222 | 0.311 |
| gi 223950623 ref NP_001138857.1 | dynein light chain Tctex-type 1 [Sus scrofa] >gi 219563062 gb ACL27890.1  Tctex-type 1 dynein light chain [Sus scrofa]                                | ---   | ---   | ---   | ---   |
| gi 350591965 ref XP_003132730.3 | PREDICTED: autophagy-related 3 isoform 2 [Sus scrofa]                                                                                                 | ---   | ---   | ---   | ---   |
| gi 335283921 ref XP_003354461.1 | PREDICTED: single Ig IL-1-related receptor [Sus scrofa]                                                                                               | ---   | ---   | ---   | ---   |
| gi 335307722 ref XP_003360950.1 | PREDICTED: single Ig IL-1-related receptor-like [Sus scrofa]                                                                                          |       |       |       |       |
| gi 365796117 dbj BAL43001.1     | single immunoglobulin IL-1R-related molecule [Sus scrofa]                                                                                             |       |       |       |       |
| gi 350588343 ref XP_003129759.3 | PREDICTED: disks large homolog 2-like [Sus scrofa]                                                                                                    | ---   | ---   | ---   | ---   |
| gi 350591860 ref XP_003358811.2 | PREDICTED: disks large homolog 1, partial [Sus scrofa]                                                                                                |       |       |       |       |
| gi 335289860 ref XP_003127290.2 | PREDICTED: LOW QUALITY PROTEIN: zinc finger CCCH domain-containing protein 4-like [Sus                                                                | ---   | ---   | ---   | ---   |

|                                 |                                                                                                                                                                                                                                                          |       |       |       |       |
|---------------------------------|----------------------------------------------------------------------------------------------------------------------------------------------------------------------------------------------------------------------------------------------------------|-------|-------|-------|-------|
|                                 | scrofa]                                                                                                                                                                                                                                                  |       |       |       |       |
| gi 350579966 ref XP_003122620.3 | PREDICTED: tRNA methyltransferase 112 homolog [Sus scrofa]                                                                                                                                                                                               | ---   | ---   | ---   | ---   |
| gi 335282788 ref XP_003123414.2 | PREDICTED: PDZ domain-containing protein GIPC1-like, partial [Sus scrofa]                                                                                                                                                                                | ---   | ---   | ---   | ---   |
| gi 311271301 ref XP_001926034.2 | PREDICTED: vacuolar protein sorting-associated protein 26A isoform 1 [Sus scrofa]                                                                                                                                                                        | 1.278 | 0.537 | 0.55  | 1.032 |
| gi 350591121 ref XP_003358453.2 | PREDICTED: phosphatidylinositide phosphatase SAC1-like [Sus scrofa]                                                                                                                                                                                      | ---   | ---   | ---   | ---   |
| gi 350591135 ref XP_003483215.1 | PREDICTED: phosphatidylinositide phosphatase SAC1-like [Sus scrofa]                                                                                                                                                                                      |       |       |       |       |
| gi 1399282 gb AAB03248.1        | hypoxanthine phosphoribosyltransferase, partial [Sus scrofa]                                                                                                                                                                                             | 1.786 | 0.932 | 1.113 | 1.596 |
| gi 4809241 gb AAD30159.1        | hypoxanthine phosphoribosyltransferase [Sus scrofa]                                                                                                                                                                                                      |       |       |       |       |
| gi 74024903 ref NP_001027548.1  | hypoxanthine-guanine phosphoribosyltransferase [Sus scrofa] >gi 85542050 sp Q45FY6.3 H PRT_PIG RecName: Full=Hypoxanthine-guanine phosphoribosyltransferase; Short=HGPR; Short=HGPRase >gi 71842219 gb AAZ43258.1  hypoxanthine phosphoribosyltransferas |       |       |       |       |
| gi 1661110 gb AAB18389.1        | hypoxanthine phosphoribosyltransferase [Sus scrofa]                                                                                                                                                                                                      |       |       |       |       |
| gi 264681434 ref NP_001161112.1 | asparagine synthetase [Sus scrofa] >gi 262036930 dbj BAI47600.1  asparagine synthetase [Sus scrofa]                                                                                                                                                      | ---   | ---   | ---   | ---   |
| gi 350579892 ref XP_003122508.3 | PREDICTED: coronin-1B-like [Sus scrofa]                                                                                                                                                                                                                  | 1.087 | 1.264 | 1.046 | 1.222 |
| gi 147225114 emb CAN13231.1     | dolichyl-phosphate mannosyltransferase polypeptide 1, catalytic subunit [Sus scrofa] >gi 147223388 emb CAN13123.1  dolichyl-phosphate                                                                                                                    | ---   | ---   | ---   | ---   |

|                                 |                                                                                                                                                                                                                                                           |       |       |       |       |
|---------------------------------|-----------------------------------------------------------------------------------------------------------------------------------------------------------------------------------------------------------------------------------------------------------|-------|-------|-------|-------|
|                                 | mannosyltransferase polypeptide 1, catalytic subunit [Sus scrofa]                                                                                                                                                                                         |       |       |       |       |
| gi 167001855 ref NP_001095290.1 | dolichol-phosphate mannosyltransferase [Sus scrofa] >gi 158513309 sp A5GFZ5.1 DPM1_PIG RecName: Full=Dolichol-phosphate mannosyltransferase; AltName: Full=Dolichol-phosphate mannose synthase; Short=DPM synthase; AltName: Full=Dolichyl-phosphate beta |       |       |       |       |
| gi 262072949 dbj BAI47782.1     | dolichyl-phosphate mannosyltransferase polypeptide 1, catalytic subunit [Sus scrofa]                                                                                                                                                                      |       |       |       |       |
| gi 350593701 ref XP_003483747.1 | PREDICTED: hypothetical protein LOC100737189 [Sus scrofa]                                                                                                                                                                                                 | ---   | ---   | ---   | ---   |
| gi 350580832 ref XP_003123718.3 | PREDICTED: clathrin light chain B-like isoform 1 [Sus scrofa]                                                                                                                                                                                             | 0.561 | 1.155 | 0.995 | 0.586 |
| gi 311275636 ref XP_003134838.1 | PREDICTED: septin-7-like isoform 1 [Sus scrofa]                                                                                                                                                                                                           | 1.268 | 0.852 | 0.765 | 1.169 |
| gi 350595354 ref XP_003134840.2 | PREDICTED: septin-7-like isoform 3 [Sus scrofa]                                                                                                                                                                                                           |       |       |       |       |
| gi 335305478 ref XP_003360219.1 | PREDICTED: septin-7-like [Sus scrofa]                                                                                                                                                                                                                     |       |       |       |       |
| gi 311251345 ref XP_003124567.1 | PREDICTED: rab GTPase-binding effector protein 2-like [Sus scrofa]                                                                                                                                                                                        | ---   | ---   | ---   | ---   |
| gi 350583690 ref XP_003125999.3 | PREDICTED: tetratricopeptide repeat protein 38-like [Sus scrofa]                                                                                                                                                                                          | 2.899 | 1.326 | 1.043 | 1.622 |
| gi 350593076 ref XP_001925759.4 | PREDICTED: vesicle transport through interaction with t-SNAREs homolog 1A-like, partial [Sus scrofa]                                                                                                                                                      | ---   | ---   | ---   | ---   |
| gi 350593078 ref XP_001926059.4 | PREDICTED: vesicle transport through interaction with t-SNAREs homolog 1A-like, partial [Sus scrofa]                                                                                                                                                      |       |       |       |       |
| gi 311253520 ref XP_003125581.1 | PREDICTED: 60S ribosomal protein L35a-like [Sus scrofa]                                                                                                                                                                                                   | ---   | ---   | ---   | ---   |
| gi 335300197 ref XP_003358821.1 | PREDICTED: 60S ribosomal protein L35a-like isoform 1 [Sus scrofa] >gi 335294628 ref XP_003357274.1  PREDICTED: 60S ribosomal protein L35a-like [Sus                                                                                                       |       |       |       |       |



|                                   |                                                                                                                                                                                                                                                           |       |       |       |       |
|-----------------------------------|-----------------------------------------------------------------------------------------------------------------------------------------------------------------------------------------------------------------------------------------------------------|-------|-------|-------|-------|
|                                   | scrofa] >gi 335300199 ref XP_003358822.1  PREDICTED: 60S ribosomal protein L35a-like isoform 2 [Sus s                                                                                                                                                     |       |       |       |       |
| gi 350580587 ref XP_003123193.3   | PREDICTED: neuropathy target esterase isoform 1 [Sus scrofa]                                                                                                                                                                                              | ---   | ---   | ---   | ---   |
| gi 350580589 ref XP_003480855.1   | PREDICTED: neuropathy target esterase [Sus scrofa]                                                                                                                                                                                                        |       |       |       |       |
| gi 311269349 ref XP_003132451.1   | PREDICTED: histone H1x-like [Sus scrofa]                                                                                                                                                                                                                  | ---   | ---   | ---   | ---   |
| gi 350584300 ref XP_003355577.2   | PREDICTED: FYVE, RhoGEF and PH domain-containing protein 4-like [Sus scrofa]                                                                                                                                                                              | ---   | ---   | ---   | ---   |
| gi 178056175 ref NP_001116558.1   | basigin precursor [Sus scrofa] >gi 166244451 gb ABY86570.1  CD147 [Sus scrofa]                                                                                                                                                                            | 0.412 | 0.438 | 0.408 | 0.371 |
| gi 194033639 ref XP_001927971.1   | PREDICTED: prostaglandin E synthase 2 [Sus scrofa]                                                                                                                                                                                                        | ---   | ---   | ---   | ---   |
| gi 246580 gb AAB21636.1           | zona pellucida-binding protein, AWN-1=C12 fragment [swine, sperm, Peptide Partial, 22 aa]                                                                                                                                                                 | 0.19  |       | 0.186 | 0.22  |
| gi 335309560 ref XP_003361682.1   | PREDICTED: DNA-directed RNA polymerase I subunit RPA34-like [Sus scrofa]                                                                                                                                                                                  | ---   | ---   | ---   | ---   |
| gi 311275477 ref XP_003134759.1   | PREDICTED: staphylococcal nuclease domain-containing protein 1-like [Sus scrofa]                                                                                                                                                                          | ---   | ---   | ---   | ---   |
| gi 61214649 sp Q767K9.1 PP1RA_PIG | RecName: Full=Serine/threonine-protein phosphatase 1 regulatory subunit 10; AltName: Full=MHC class I region proline-rich protein CAT53; AltName: Full=Protein FB19 >gi 178056844 ref NP_001116637.1  serine/threonine-protein phosphatase 1 regulatory s | 0.821 | 0.933 | 1.391 | 0.92  |
| gi 311271051 ref XP_003133041.1   | PREDICTED: synaptosomal-associated protein 29-like [Sus scrofa]                                                                                                                                                                                           | ---   | ---   | ---   | ---   |
| gi 350594395 ref XP_003359859.2   | PREDICTED: transportin-1 [Sus scrofa]                                                                                                                                                                                                                     | 0.539 | 0.288 | 1.011 | 0.628 |
| gi 195539480 ref NP_001124203.1   | bystin [Sus scrofa] >gi 155964243 gb ABU40181                                                                                                                                                                                                             | ---   | ---   | ---   | ---   |

|                                     |                                                                                                                                                                                                                                                            |       |      |       |       |
|-------------------------------------|------------------------------------------------------------------------------------------------------------------------------------------------------------------------------------------------------------------------------------------------------------|-------|------|-------|-------|
|                                     | .1  bystin-like [Sus scrofa]                                                                                                                                                                                                                               |       |      |       |       |
| gi 350595768 ref XP_003135230.3     | PREDICTED: phosphorylase b kinase regulatory subunit alpha, skeletal muscle isoform-like, partial [Sus scrofa]                                                                                                                                             | ---   | ---  | ---   | ---   |
| gi 296531513 ref NP_001171875.1     | lymphocyte antigen 75 precursor [Sus scrofa] >gi 283854885 gb ACV89989.1  CD205 [Sus scrofa]                                                                                                                                                               | ---   | ---  | ---   | ---   |
| gi 50657386 ref NP_001002801.1      | apolipoprotein C-III precursor [Sus scrofa] >gi 416627 sp P27917.2 APO C3_PIG RecName: Full=Apolipoprotein C-III; Short=Apo-CIII; Short=ApoC-III; AltName: Full=Apolipoprotein C3; Flags: Precursor >gi 164361 gb AAA30993.1  apolipoprotein C-III [Sus sc | 0.204 | 0.24 | 0.217 | 0.237 |
| gi 311249451 ref XP_003123641.1     | PREDICTED: uncharacterized protein UNQ511/PRO1026 homolog isoform 1 [Sus scrofa]                                                                                                                                                                           | ---   | ---  | ---   | ---   |
| gi 335282983 ref XP_003354207.1     | PREDICTED: uncharacterized protein UNQ511/PRO1026 homolog isoform 2 [Sus scrofa]                                                                                                                                                                           |       |      |       |       |
| gi 350582720 ref XP_003481337.1     | PREDICTED: isoamyl acetate-hydrolyzing esterase 1 homolog [Sus scrofa]                                                                                                                                                                                     | ---   | ---  | ---   | ---   |
| gi 951375 gb AAA74655.1             | apolipoprotein B [Sus scrofa]                                                                                                                                                                                                                              | ---   | ---  | ---   | ---   |
| gi 350597081 ref XP_003484354.1     | PREDICTED: LOW QUALITY PROTEIN: apolipoprotein B-100 [Sus scrofa]                                                                                                                                                                                          |       |      |       |       |
| gi 6013139 gb AAF01257.1 AF109646_1 | coxsackie-adenovirus-receptor homolog [Sus scrofa]                                                                                                                                                                                                         | ---   | ---  | ---   | ---   |
| gi 350592092 ref XP_001924589.4     | PREDICTED: coxsackievirus and adenovirus receptor homolog isoform 1 [Sus scrofa]                                                                                                                                                                           |       |      |       |       |
| gi 350586377 ref XP_003128223.3     | PREDICTED: thioredoxin domain-containing protein 5-like, partial [Sus scrofa]                                                                                                                                                                              | ---   | ---  | ---   | ---   |
| gi 190360629 ref NP_001121936.1     | stromal membrane-associated protein 2 [Sus scrofa] >gi 183223973 dbj BAG24503.1  stromal membrane-associated protein 1-like [Sus scrofa]                                                                                                                   | ---   | ---  | ---   | ---   |

|                                   |                                                                                                                                                                                                                     |       |       |       |       |
|-----------------------------------|---------------------------------------------------------------------------------------------------------------------------------------------------------------------------------------------------------------------|-------|-------|-------|-------|
| gi 335300981 ref XP_001926354.2   | PREDICTED: 60S acidic ribosomal protein P1-like [Sus scrofa]                                                                                                                                                        | ---   | ---   | ---   | ---   |
| gi 311248936 ref XP_003123385.1   | PREDICTED: phenylalanyl-tRNA synthetase alpha chain-like [Sus scrofa]                                                                                                                                               | ---   | ---   | ---   | ---   |
| gi 335308639 ref XP_003361313.1   | PREDICTED: probable hydrolase PNKD-like, partial [Sus scrofa]                                                                                                                                                       | 0.744 | 0.459 | 0.519 | 0.559 |
| gi 350587090 ref XP_001926625.4   | PREDICTED: serine palmitoyltransferase 2 [Sus scrofa]                                                                                                                                                               | ---   | ---   | ---   | ---   |
| gi 350589269 ref XP_003357681.2   | PREDICTED: LOW QUALITY PROTEIN: MOSC domain-containing protein 1, mitochondrial-like [Sus scrofa]                                                                                                                   | ---   | ---   | ---   | ---   |
| gi 350589272 ref XP_003482825.1   | PREDICTED: MOSC domain-containing protein 1, mitochondrial-like [Sus scrofa]                                                                                                                                        |       |       |       |       |
| gi 335296836 ref XP_003357876.1   | PREDICTED: hypothetical protein LOC100624456 [Sus scrofa]                                                                                                                                                           | ---   | ---   | ---   | ---   |
| gi 335301996 ref XP_001925416.3   | PREDICTED: insulin-degrading enzyme isoform 1 [Sus scrofa]                                                                                                                                                          | ---   | ---   | ---   | ---   |
| gi 335301998 ref XP_003359343.1   | PREDICTED: insulin-degrading enzyme isoform 2 [Sus scrofa]                                                                                                                                                          |       |       |       |       |
| gi 350581169 ref XP_003124100.2   | PREDICTED: UPF0467 protein C5orf32 homolog [Sus scrofa]                                                                                                                                                             | ---   | ---   | ---   | ---   |
| gi 227336237 gb ACP20834.1        | selenocysteine lyase [Sus scrofa]                                                                                                                                                                                   | ---   | ---   | ---   | ---   |
| gi 311273333 ref XP_003133817.1   | PREDICTED: selenocysteine lyase [Sus scrofa]                                                                                                                                                                        |       |       |       |       |
| gi 311267394 ref XP_003131544.1   | PREDICTED: 26S proteasome non-ATPase regulatory subunit 3-like [Sus scrofa]                                                                                                                                         | ---   | ---   | ---   | ---   |
| gi 335307890 ref XP_003131560.2   | PREDICTED: 26S proteasome non-ATPase regulatory subunit 3-like, partial [Sus scrofa]                                                                                                                                |       |       |       |       |
| gi 50401716 sp Q6J118.1 RN114_PIG | RecName: Full=RING finger protein 114; AltName: Full=Zinc finger protein 313 >gi 49274651 ref NP_001001869.1  RING finger protein 114 [Sus scrofa] >gi 47607447 gb AAT36620.1  zinc finger protein 313 [Sus scrofa] | ---   | ---   | ---   | ---   |
| gi 335298143 ref XP_003131        | PREDICTED: zinc finger protein 207                                                                                                                                                                                  | ---   | ---   | ---   | ---   |

|                                     |                                                                                                                                                                                                                                                           |       |       |       |       |
|-------------------------------------|-----------------------------------------------------------------------------------------------------------------------------------------------------------------------------------------------------------------------------------------------------------|-------|-------|-------|-------|
| 778.2                               | isoform 1 [Sus scrofa]                                                                                                                                                                                                                                    |       |       |       |       |
| gi 335298147 ref XP_003131780.2     | PREDICTED: zinc finger protein 207 isoform 3 [Sus scrofa]                                                                                                                                                                                                 |       |       |       |       |
| gi 335298145 ref XP_003131779.2     | PREDICTED: zinc finger protein 207 isoform 2 [Sus scrofa]                                                                                                                                                                                                 |       |       |       |       |
| gi 335307509 ref XP_003360867.1     | PREDICTED: lipoma-preferred partner-like, partial [Sus scrofa]                                                                                                                                                                                            | 0.795 | 1.317 | 1.276 | 1.036 |
| gi 350591812 ref XP_003483339.1     | PREDICTED: lipoma-preferred partner-like [Sus scrofa]                                                                                                                                                                                                     |       |       |       |       |
| gi 335294600 ref XP_003129756.2     | PREDICTED: pre-mRNA cleavage complex 2 protein Pcf11 [Sus scrofa]                                                                                                                                                                                         | 0.728 | 1.004 | 1.125 | 0.759 |
| gi 28373591 pdb 1M3E C              | Chain C, Succinyl-Coa:3-Ketoacid Coa Transferase From Pig Heart (Selenomethionine) >gi 28373589 pdb 1M3E A Chain A, Succinyl-Coa:3-Ketoacid Coa Transferase From Pig Heart (Selenomethionine) >gi 28373592 pdb 1M3E D Chain D, Succinyl-Coa:3-Ketoacid Co | ---   | ---   | ---   | ---   |
| gi 300193176 pdb 3K6M B             | Chain B, Dynamic Domains Of Succinyl-Coa:3-Ketoacid-Coenzyme A Transferase From Pig Heart. >gi 300193174 pdb 3K6M D Chain D, Dynamic Domains Of Succinyl-Coa:3-Ketoacid-Coenzyme A Transferase From Pig Heart. >gi 300193175 pdb 3K6M C Chain C, Dynamic  |       |       |       |       |
| gi 395398464 sp Q29551.2 S COT1_PIG | RecName: Full=Succinyl-CoA:3-ketoacid coenzyme A transferase 1, mitochondrial; AltName: Full=3-oxoacid CoA-transferase 1; AltName: Full=Somatic-type succinyl-CoA:3-oxoacid CoA-transferase; Short=SCOT-s; Flags: Precursor                               |       |       |       |       |
| gi 47522610 ref NP_999103.1         | succinyl-CoA:3-ketoacid coenzyme A transferase 1, mitochondrial precursor [Sus scrofa] >gi 164423 gb AAA31019.1  succinyl-CoA:alpha-ketoacid                                                                                                              |       |       |       |       |

|                                 |                                                                                                                                                                                                                                                                 |       |       |       |       |
|---------------------------------|-----------------------------------------------------------------------------------------------------------------------------------------------------------------------------------------------------------------------------------------------------------------|-------|-------|-------|-------|
|                                 | coenzyme A transferase [Sus scrofa]                                                                                                                                                                                                                             |       |       |       |       |
| gi 158429140 pdb 2NRC D         | Chain D, C28a Mutant Of Succinyl-Coa:3-Ketoacid Coa Transferase From Pig Heart >gi 158429138 pdb 2NRC B<br>Chain B, C28a Mutant Of Succinyl-Coa:3-Ketoacid Coa Transferase From Pig Heart >gi 158429139 pdb 2NRC C<br>Chain C, C28a Mutant Of Succinyl-Coa:3-Ke |       |       |       |       |
| gi 48425138 pdb 1OPE A          | Chain A, Deletion Mutant Of Succinyl-Coa:3-Ketoacid Coa Transferase From Pig Heart >gi 48425136 pdb 1OOZ A<br>Chain A, Deletion Mutant Of Succinyl-Coa:3-Ketoacid Coa Transferase From Pig Heart >gi 48425139 pdb 1OPE B<br>Chain B, Deletion Mutant Of Succiny |       |       |       |       |
| gi 158429135 pdb 2NRB C         | Chain C, C28s Mutant Of Succinyl-Coa:3-Ketoacid Coa Transferase From Pig Heart >gi 158429133 pdb 2NRB A<br>Chain A, C28s Mutant Of Succinyl-Coa:3-Ketoacid Coa Transferase From Pig Heart >gi 158429136 pdb 2NRB D<br>Chain D, C28s Mutant Of Succinyl-Coa:3-Ke |       |       |       |       |
| gi 350591891 ref XP_003132672.3 | PREDICTED: uridine 5~-monophosphate synthase-like [Sus scrofa]                                                                                                                                                                                                  | 1.043 | 0.583 | 0.734 | 0.766 |
| gi 311243865 ref XP_003121220.1 | PREDICTED: costars family protein C6orf115-like isoform 2 [Sus scrofa]                                                                                                                                                                                          | ---   | ---   | ---   | ---   |
| gi 335278956 ref XP_003353243.1 | PREDICTED: costars family protein C6orf115-like [Sus scrofa] >gi 335278958 ref XP_003353244.1  PREDICTED: costars family protein C6orf115-like [Sus scrofa]                                                                                                     |       |       |       |       |
| gi 350596336 ref XP_003361058.2 | PREDICTED: desmocollin-2 [Sus scrofa]                                                                                                                                                                                                                           | 1.338 | 1.363 | 1.878 | 1.045 |
| gi 350579705 ref XP_003122      | PREDICTED: TBC1 domain family                                                                                                                                                                                                                                   | ---   | ---   | ---   | ---   |

|                                    |                                                                                                                                                                                                                                                         |       |       |       |       |
|------------------------------------|---------------------------------------------------------------------------------------------------------------------------------------------------------------------------------------------------------------------------------------------------------|-------|-------|-------|-------|
| 274.3                              | member 13 [Sus scrofa]                                                                                                                                                                                                                                  |       |       |       |       |
| gi 311254945 ref XP_003126007.1    | PREDICTED: nuclear pore complex protein Nup50 [Sus scrofa]                                                                                                                                                                                              | ---   | ---   | ---   | ---   |
| gi 350596555 ref XP_003484289.1    | PREDICTED: nuclear pore complex protein Nup50-like [Sus scrofa]                                                                                                                                                                                         |       |       |       |       |
| gi 350591479 ref XP_003483280.1    | PREDICTED: acyl-CoA dehydrogenase family member 9, mitochondrial-like, partial [Sus scrofa]                                                                                                                                                             | ---   | ---   | ---   | ---   |
| gi 335289868 ref XP_003127303.2    | PREDICTED: coiled-coil domain-containing protein 9 [Sus scrofa]                                                                                                                                                                                         | ---   | ---   | ---   | ---   |
| gi 350593239 ref XP_003483642.1    | PREDICTED: UBX domain-containing protein 4-like [Sus scrofa]                                                                                                                                                                                            | ---   | ---   | ---   | ---   |
| gi 350587143 ref XP_001927117.4    | PREDICTED: legumain [Sus scrofa]                                                                                                                                                                                                                        | ---   | ---   | ---   | ---   |
| gi 350589300 ref XP_003130593.3    | PREDICTED: hypothetical protein LOC100525245 [Sus scrofa]                                                                                                                                                                                               | 0.586 | 0.804 | 0.667 | 0.852 |
| gi 335300577 ref XP_003358945.1    | PREDICTED: ubiquitin carboxyl-terminal hydrolase 16-like isoform 1 [Sus scrofa]                                                                                                                                                                         | ---   | ---   | ---   | ---   |
| gi 311270664 ref XP_001924462.2    | PREDICTED: V-set and immunoglobulin domain-containing protein 10 [Sus scrofa]                                                                                                                                                                           | ---   | ---   | ---   | ---   |
| gi 335307295 ref XP_003360785.1    | PREDICTED: tetraspanin-31-like [Sus scrofa]                                                                                                                                                                                                             | 0.264 | 0.17  |       | 0.255 |
| gi 350588836 ref XP_003357506.2    | PREDICTED: tetraspanin-13-like [Sus scrofa]                                                                                                                                                                                                             |       |       |       |       |
| gi 194044687 ref XP_001928924.1    | PREDICTED: acyl-coenzyme A thioesterase 8 [Sus scrofa]                                                                                                                                                                                                  | ---   | ---   | ---   | ---   |
| gi 335284373 ref XP_003354586.1    | PREDICTED: LOW QUALITY PROTEIN: E3 ubiquitin-protein ligase BRE1B-like [Sus scrofa]                                                                                                                                                                     | ---   | ---   | ---   | ---   |
| gi 126302599 sp P04163.2 S10AA_PIG | RecName: Full=Protein S100-A10; AltName: Full=Calpactin I light chain; AltName: Full=Calpactin-1 light chain; AltName: Full=Cellular ligand of annexin II; AltName: Full=S100 calcium-binding protein A10; AltName: Full=p10 protein; AltName: Full=p11 | 0.619 | 1.123 | 1.869 | 1.304 |

|                                   |                                                                                                                                                                                                                                                           |     |     |     |     |
|-----------------------------------|-----------------------------------------------------------------------------------------------------------------------------------------------------------------------------------------------------------------------------------------------------------|-----|-----|-----|-----|
| gi 335286919 ref XP_003355216.1   | PREDICTED: protein S100-A10-like isoform 4 [Sus scrofa] >gi 335286915 ref XP_003355214.1  PREDICTED: protein S100-A10-like isoform 2 [Sus scrofa] >gi 335286917 ref XP_003355215.1  PREDICTED: protein S100-A10-like isoform 3 [Sus scrofa] >gi 311254303 |     |     |     |     |
| gi 335288415 ref XP_003355612.1   | PREDICTED: serine-threonine kinase receptor-associated protein-like [Sus scrofa]                                                                                                                                                                          | --- | --- | --- | --- |
| gi 350591920 ref XP_003483358.1   | PREDICTED: poly [ADP-ribose] polymerase 14 [Sus scrofa]                                                                                                                                                                                                   | --- | --- | --- | --- |
| gi 158514031 sp A1XQU5.1 RL27_PIG | RecName: Full=60S ribosomal protein L27 >gi 148226949 ref NP_001090948.1  60S ribosomal protein L27 [Sus scrofa] >gi 117661046 gb ABK55651.1  RPL27 [Sus scrofa]                                                                                          | --- | --- | --- | --- |
| gi 47523714 ref NP_999490.1       | mitochondrial Rho GTPase 2 [Sus scrofa] >gi 75072868 sp Q864R5.1 M IRO2_PIG RecName: Full=Mitochondrial Rho GTPase 2; Short=MIRO-2; AltName: Full=Ras homolog gene family member T2 >gi 30025664 gb AAP04408.1  rho GTPase [Sus scrofa]                   | --- | --- | --- | --- |
| gi 342187294 ref NP_001230119.1   | syndecan-1 precursor [Sus scrofa]                                                                                                                                                                                                                         | --- | --- | --- | --- |
| gi 194042152 ref XP_001924391.1   | PREDICTED: WD repeat-containing protein 11 [Sus scrofa]                                                                                                                                                                                                   | --- | --- | --- | --- |
| gi 5915886 sp O46427.1 CAT H_PIG  | RecName: Full=Pro-cathepsin H; Contains: RecName: Full=Cathepsin H mini chain; Contains: RecName: Full=Cathepsin H; Contains: RecName: Full=Cathepsin H heavy chain; Contains: RecName: Full=Cathepsin H light chain; Flags: Precursor >gi 47522632 ref N | --- | --- | --- | --- |
| gi 156046107 gb ABU42573.1        | cathepsin H variant 2 [Sus scrofa]                                                                                                                                                                                                                        |     |     |     |     |
| gi 172050735 gb ACB70169.         | cathepsin H transcript variant 3 [Sus                                                                                                                                                                                                                     |     |     |     |     |

|                                 |                                                                                                                                                                                                                                                           |       |       |       |       |
|---------------------------------|-----------------------------------------------------------------------------------------------------------------------------------------------------------------------------------------------------------------------------------------------------------|-------|-------|-------|-------|
| 1                               | scrofa]                                                                                                                                                                                                                                                   |       |       |       |       |
| gi 28948787 pdb 1NB3 C          | Chain C, Crystal Structure Of Stefin A In Complex With Cathepsin H: N-Terminal Residues Of Inhibitors Can Adapt To The Active Sites Of Endo-And Exopeptidases >gi 28948781 pdb 1NB3 A Chain A, Crystal Structure Of Stefin A In Complex With Cathepsin H: |       |       |       |       |
| gi 171948778 gb ACB59246.1      | cathepsin H [Sus scrofa]                                                                                                                                                                                                                                  |       |       |       |       |
| gi 350588133 ref XP_003482569.1 | PREDICTED: LOW QUALITY PROTEIN: interferon-induced very large GTPase 1, partial [Sus scrofa]                                                                                                                                                              | ---   | ---   | ---   | ---   |
| gi 194041277 ref XP_001924306.1 | PREDICTED: TATA element modulatory factor [Sus scrofa]                                                                                                                                                                                                    | ---   | ---   | ---   | ---   |
| gi 350590398 ref XP_003131591.3 | PREDICTED: CDK5 regulatory subunit-associated protein 3-like [Sus scrofa]                                                                                                                                                                                 | ---   | ---   | ---   | ---   |
| gi 350582111 ref XP_003124939.2 | PREDICTED: LOW QUALITY PROTEIN: eukaryotic translation initiation factor 5B [Sus scrofa]                                                                                                                                                                  | ---   | ---   | ---   | ---   |
| gi 335309033 ref XP_003121764.2 | PREDICTED: organic solute transporter subunit beta-like [Sus scrofa]                                                                                                                                                                                      | ---   | ---   | ---   | ---   |
| gi 335310602 ref XP_003362108.1 | PREDICTED: echinoderm microtubule-associated protein-like 2-like, partial [Sus scrofa]                                                                                                                                                                    | ---   | ---   | ---   | ---   |
| gi 350594364 ref XP_003134050.3 | PREDICTED: protein LAP2 [Sus scrofa]                                                                                                                                                                                                                      | ---   | ---   | ---   | ---   |
| gi 343488514 ref NP_001230416.1 | ubiquitin-related modifier 1 homolog [Sus scrofa]                                                                                                                                                                                                         | ---   | ---   | ---   | ---   |
| gi 350582717 ref XP_003125434.3 | PREDICTED: rho-associated protein kinase 2, partial [Sus scrofa]                                                                                                                                                                                          | ---   | ---   | ---   | ---   |
| gi 350580947 ref XP_003123849.3 | PREDICTED: endoplasmic reticulum aminopeptidase 2-like, partial [Sus scrofa]                                                                                                                                                                              | 0.801 | 0.635 | 0.615 | 0.908 |
| gi 212549621 ref NP_001131100.1 | growth factor receptor-bound protein 2 [Sus scrofa] >gi 208612619 gb ACI29749.1  growth factor receptor bound                                                                                                                                             | ---   | ---   | ---   | ---   |



|                                 |                                                                                                                                                                                                                                    |     |     |     |     |
|---------------------------------|------------------------------------------------------------------------------------------------------------------------------------------------------------------------------------------------------------------------------------|-----|-----|-----|-----|
|                                 | protein 2 [Sus scrofa]                                                                                                                                                                                                             |     |     |     |     |
| gi 311248892 ref XP_003123362.1 | PREDICTED: lysosomal alpha-mannosidase-like isoform 1 [Sus scrofa]                                                                                                                                                                 | --- | --- | --- | --- |
| gi 311275439 ref XP_003134730.1 | PREDICTED: transportin-3 isoform 1 [Sus scrofa]                                                                                                                                                                                    | --- | --- | --- | --- |
| gi 335305352 ref XP_003360189.1 | PREDICTED: transportin-3 isoform 2 [Sus scrofa]                                                                                                                                                                                    |     |     |     |     |
| gi 335305354 ref XP_003360190.1 | PREDICTED: transportin-3 isoform 3 [Sus scrofa]                                                                                                                                                                                    |     |     |     |     |
| gi 116175267 ref NP_001070690.1 | U1 small nuclear ribonucleoprotein A [Sus scrofa] >gi 122131847 sp Q06AA4.1  SNRPA_PIG RecName: Full=U1 small nuclear ribonucleoprotein A; Short=U1 snRNP A; Short=U1-A; Short=U1A >gi 115371743 gb ABI96196.1  SNRPA [Sus scrofa] | --- | --- | --- | --- |
| gi 116175273 ref NP_001070696.1 | uncharacterized protein LOC768116 [Sus scrofa] >gi 115371759 gb ABI96204.1  RU2B [Sus scrofa]                                                                                                                                      |     |     |     |     |
| gi 311248398 ref XP_003123116.1 | PREDICTED: chromatin assembly factor 1 subunit A-like [Sus scrofa]                                                                                                                                                                 | --- | --- | --- | --- |
| gi 350578878 ref XP_003353487.2 | PREDICTED: tight junction protein ZO-1 [Sus scrofa]                                                                                                                                                                                | --- | --- | --- | --- |
| gi 194042423 ref XP_001926989.1 | PREDICTED: cleavage stimulation factor subunit 2 tau variant isoform 1 [Sus scrofa]                                                                                                                                                | --- | --- | --- | --- |
| gi 311276614 ref XP_003135279.1 | PREDICTED: cleavage stimulation factor subunit 2-like isoform 1 [Sus scrofa]                                                                                                                                                       |     |     |     |     |
| gi 335306285 ref XP_003360436.1 | PREDICTED: cleavage stimulation factor subunit 2-like isoform 2 [Sus scrofa]                                                                                                                                                       |     |     |     |     |
| gi 350593080 ref XP_001927062.4 | PREDICTED: LOW QUALITY PROTEIN: uncharacterized protein C10orf118 [Sus scrofa]                                                                                                                                                     | --- | --- | --- | --- |
| gi 311249343 ref XP_003123584.1 | PREDICTED: coatomer subunit epsilon-like isoform 1 [Sus scrofa]                                                                                                                                                                    | --- | --- | --- | --- |
| gi 311249345 ref XP_003123586.1 | PREDICTED: coatomer subunit epsilon-like isoform 3 [Sus scrofa]                                                                                                                                                                    |     |     |     |     |

|                                    |                                                                                                                                                                                              |       |       |       |       |
|------------------------------------|----------------------------------------------------------------------------------------------------------------------------------------------------------------------------------------------|-------|-------|-------|-------|
| gi 350595741 ref XP_003484170.1    | PREDICTED: disks large homolog 3 isoform 2 [Sus scrofa]                                                                                                                                      | ---   | ---   | ---   | ---   |
| gi 350595743 ref XP_003135199.3    | PREDICTED: disks large homolog 3 isoform 1 [Sus scrofa]                                                                                                                                      |       |       |       |       |
| gi 350595745 ref XP_003484171.1    | PREDICTED: disks large homolog 3 isoform 3 [Sus scrofa]                                                                                                                                      |       |       |       |       |
| gi 311276931 ref XP_003135414.1    | PREDICTED: U3 small nucleolar RNA-associated protein 14 homolog A-like isoform 1 [Sus scrofa]                                                                                                | 0.44  | 0.533 | 0.443 | 0.578 |
| gi 311276933 ref XP_003135415.1    | PREDICTED: U3 small nucleolar RNA-associated protein 14 homolog A-like isoform 2 [Sus scrofa]                                                                                                |       |       |       |       |
| gi 350582038 ref XP_003124891.3    | PREDICTED: U5 small nuclear ribonucleoprotein 200 kDa helicase-like [Sus scrofa]                                                                                                             | ---   | ---   | ---   | ---   |
| gi 311257842 ref XP_003127319.1    | PREDICTED: glutamate-rich WD repeat-containing protein 1-like [Sus scrofa]                                                                                                                   | ---   | ---   | ---   | ---   |
| gi 335291465 ref XP_003128033.2    | PREDICTED: UPF0587 protein C1orf123 homolog [Sus scrofa]                                                                                                                                     | ---   | ---   | ---   | ---   |
| gi 1717797 sp P52552.1 PRDX2_PIG   | RecName: Full=Peroxiredoxin-2; AltName: Full=Thiol-specific antioxidant protein; Short=TSA; AltName: Full=Thioredoxin peroxidase 1; AltName: Full=Thioredoxin-dependent peroxide reductase 1 | 2.762 | 1.141 | 0.737 | 1.769 |
| gi 347300176 ref NP_001231403.1    | peroxiredoxin-2 [Sus scrofa]                                                                                                                                                                 |       |       |       |       |
| gi 264681442 ref NP_001161116.1    | dynactin subunit 6 [Sus scrofa] >gi 262072943 dbj BAI47779.1  dynactin 6 [Sus scrofa]                                                                                                        | ---   | ---   | ---   | ---   |
| gi 31074212 gb AAP37947.1          | cell cycle progression 2 protein [Sus scrofa]                                                                                                                                                | ---   | ---   | ---   | ---   |
| gi 178056484 ref NP_001116573.1    | protein TBRG4 [Sus scrofa] >gi 31074402 gb AAP37946.1  cell cycle progression 2 protein [Sus scrofa]                                                                                         |       |       |       |       |
| gi 124053394 sp Q7YS91.2 TBRG4_PIG | RecName: Full=Protein TBRG4; AltName: Full=Cell cycle progression protein 2; AltName: Full=Transforming growth factor beta                                                                   |       |       |       |       |

|                                 |                                                                                                                                                                                                                                                           |       |       |       |       |
|---------------------------------|-----------------------------------------------------------------------------------------------------------------------------------------------------------------------------------------------------------------------------------------------------------|-------|-------|-------|-------|
|                                 | regulator 4                                                                                                                                                                                                                                               |       |       |       |       |
| gi 335310523 ref XP_003362072.1 | PREDICTED: protein TBRG4-like, partial [Sus scrofa]                                                                                                                                                                                                       |       |       |       |       |
| gi 350593043 ref XP_001929355.3 | PREDICTED: alpha-internexin [Sus scrofa]                                                                                                                                                                                                                  | 0.589 | 0.71  | 0.753 | 0.56  |
| gi 350583051 ref XP_003125610.3 | PREDICTED: protein virilizer homolog [Sus scrofa]                                                                                                                                                                                                         | ---   | ---   | ---   | ---   |
| gi 311277128 ref XP_003135516.1 | PREDICTED: high mobility group protein B3-like [Sus scrofa]                                                                                                                                                                                               | ---   | ---   | ---   | ---   |
| gi 350588037 ref XP_003482541.1 | PREDICTED: high mobility group protein B3-like [Sus scrofa] >gi 350588033 ref XP_003482539.1  PREDICTED: high mobility group protein B3-like [Sus scrofa]                                                                                                 |       |       |       |       |
| gi 350594590 ref XP_003483925.1 | PREDICTED: golgin subfamily A member 7-like isoform 1 [Sus scrofa] >gi 350594586 ref XP_003483923.1  PREDICTED: golgin subfamily A member 7 [Sus scrofa] >gi 350594592 ref XP_003483926.1  PREDICTED: golgin subfamily A member 7-like isoform 2 [Sus scr | ---   | ---   | ---   | ---   |
| gi 350583523 ref XP_003481536.1 | PREDICTED: putative helicase MOV-10 [Sus scrofa]                                                                                                                                                                                                          | ---   | ---   | ---   | ---   |
| gi 350580612 ref XP_003123174.3 | PREDICTED: cdc42-interacting protein 4-like isoform 1 [Sus scrofa]                                                                                                                                                                                        | ---   | ---   | ---   | ---   |
| gi 343478257 ref NP_001230394.1 | peptidase M20 domain containing 1 [Sus scrofa]                                                                                                                                                                                                            | ---   | ---   | ---   | ---   |
| gi 335307003 ref XP_001926406.3 | PREDICTED: LanC lantibiotic synthetase component C-like 1 [Sus scrofa]                                                                                                                                                                                    | 2.656 | 0.591 | 0.618 | 1.642 |
| gi 298160936 ref NP_001177146.1 | transmembrane protein C9orf46 [Sus scrofa]                                                                                                                                                                                                                | 0.545 | 0.35  | 0.364 | 0.601 |
| gi 350595661 ref XP_003360337.2 | PREDICTED: RNA-binding protein 10-like, partial [Sus scrofa]                                                                                                                                                                                              | ---   | ---   | ---   | ---   |
| gi 350590442 ref XP_003483060.1 | PREDICTED: epsin-3-like [Sus scrofa] >gi 311267546 ref XP_003131620.1  PREDICTED: epsin-3 [Sus scrofa]                                                                                                                                                    | ---   | ---   | ---   | ---   |
| gi 350578717 ref XP_003121581.3 | PREDICTED: eukaryotic translation initiation factor 3 subunit J-like                                                                                                                                                                                      | ---   | ---   | ---   | ---   |

|                                    |                                                                                                                                                                                                                                                          |     |     |     |     |
|------------------------------------|----------------------------------------------------------------------------------------------------------------------------------------------------------------------------------------------------------------------------------------------------------|-----|-----|-----|-----|
|                                    | isoform 1 [Sus scrofa]                                                                                                                                                                                                                                   |     |     |     |     |
| gi 350592596 ref XP_003133009.3    | PREDICTED: merlin isoform 1 [Sus scrofa]                                                                                                                                                                                                                 | --- | --- | --- | --- |
| gi 350592600 ref XP_003483495.1    | PREDICTED: merlin [Sus scrofa]                                                                                                                                                                                                                           |     |     |     |     |
| gi 350592602 ref XP_003483496.1    | PREDICTED: merlin [Sus scrofa]                                                                                                                                                                                                                           |     |     |     |     |
| gi 350592606 ref XP_003483497.1    | PREDICTED: merlin [Sus scrofa]                                                                                                                                                                                                                           |     |     |     |     |
| gi 350592598 ref XP_003483494.1    | PREDICTED: merlin [Sus scrofa]                                                                                                                                                                                                                           |     |     |     |     |
| gi 350592604 ref XP_003133012.3    | PREDICTED: merlin isoform 4 [Sus scrofa]                                                                                                                                                                                                                 |     |     |     |     |
| gi 311251005 ref XP_003124395.1    | PREDICTED: TSC22 domain family protein 4-like [Sus scrofa] >gi 311251027 ref XP_003124405.1  PREDICTED: TSC22 domain family protein 4-like [Sus scrofa]                                                                                                  | --- | --- | --- | --- |
| gi 350529368 ref NP_001231920.1    | synaptojanin 2 binding protein [Sus scrofa]                                                                                                                                                                                                              | --- | --- | --- | --- |
| gi 350584802 ref XP_003481825.1    | PREDICTED: neighbor of COX4-like [Sus scrofa]                                                                                                                                                                                                            | --- | --- | --- | --- |
| gi 350584804 ref XP_003355777.2    | PREDICTED: neighbor of COX4-like, partial [Sus scrofa]                                                                                                                                                                                                   |     |     |     |     |
| gi 350591308 ref XP_003132335.3    | PREDICTED: bis(5~-adenosyl)-triphosphatase-like [Sus scrofa]                                                                                                                                                                                             | --- | --- | --- | --- |
| gi 34978340 sp P36887.4 KA PCA_PIG | RecName: Full=cAMP-dependent protein kinase catalytic subunit alpha; Short=PKA C-alpha                                                                                                                                                                   | --- | --- | --- | --- |
| gi 190589912 gb ACE79215.1         | cyclic AMP-dependent protein kinase A catalytic subunit [Sus scrofa]                                                                                                                                                                                     |     |     |     |     |
| gi 334878385 pdb 1CDK A            | Chain A, Camp-Dependent Protein Kinase Catalytic Subunit (E.C.2.7.1.37) (Protein Kinase A) Complexed With Protein Kinase Inhibitor Peptide Fragment 5-24 (Pki(5-24) Isoelectric Variant Ca) And Mn2+ Adenylyl Imidodiphosphate (Mnamp-Pnp) At Ph 5.6 And |     |     |     |     |
| gi 305677665 pdb 3AGM A            | Chain A, Complex Of Pka With The                                                                                                                                                                                                                         |     |     |     |     |

|                                 |                                                                                                                                               |     |     |     |     |
|---------------------------------|-----------------------------------------------------------------------------------------------------------------------------------------------|-----|-----|-----|-----|
|                                 | Bisubstrate Protein Kinase Inhibitor Arc-670                                                                                                  |     |     |     |     |
| gi 334878402 pdb 1CTP E         | Chain E, Structure Of The Mammalian Catalytic Subunit Of Camp-Dependent Protein Kinase And An Inhibitor Peptide Displays An Open Conformation |     |     |     |     |
| gi 157838448 pdb 1CMK E         | Chain E, Crystal Structures Of The Myristylated Catalytic Subunit Of Camp- Dependent Protein Kinase Reveal Open And Closed Conformations      |     |     |     |     |
| gi 311248983 ref XP_003123401.1 | PREDICTED: cAMP-dependent protein kinase catalytic subunit alpha isoform 1 [Sus scrofa]                                                       |     |     |     |     |
| gi 335282773 ref XP_003354151.1 | PREDICTED: cAMP-dependent protein kinase catalytic subunit alpha [Sus scrofa]                                                                 |     |     |     |     |
| gi 311250750 ref XP_003124275.1 | PREDICTED: 26S proteasome non-ATPase regulatory subunit 13-like [Sus scrofa]                                                                  | --- | --- | --- | --- |
| gi 194039474 ref XP_001924848.1 | PREDICTED: DNA replication licensing factor MCM3 [Sus scrofa]                                                                                 | --- | --- | --- | --- |
| gi 350534920 ref NP_001233134.1 | interferon-induced protein 44 [Sus scrofa] >gi 332113311 gb AEE02032.1  interferon-inducible microtubular aggregate protein 44 [Sus scrofa]   | --- | --- | --- | --- |
| gi 346716263 ref NP_001231270.1 | protein tyrosine phosphatase type IVA 2 [Sus scrofa]                                                                                          | --- | --- | --- | --- |
| gi 335308977 ref XP_003361445.1 | PREDICTED: cytoplasmic FMR1-interacting protein 1-like, partial [Sus scrofa]                                                                  | --- | --- | --- | --- |
| gi 350594468 ref XP_003134162.3 | PREDICTED: cytoplasmic FMR1-interacting protein 2-like [Sus scrofa]                                                                           |     |     |     |     |
| gi 38569755 gb AAR24396.1       | vimentin [Sus scrofa]                                                                                                                         | --- | --- | --- | --- |
| gi 346716275 ref NP_001231275.1 | dnaJ homolog subfamily B member 11 precursor [Sus scrofa]                                                                                     | --- | --- | --- | --- |
| gi 350594138 ref XP_001927044.4 | PREDICTED: signal transducing adapter molecule 2 [Sus scrofa]                                                                                 | --- | --- | --- | --- |
| gi 231467 sp P29700.1 FETUA_PIG | RecName: Full=Alpha-2-HS-glycoprotein;                                                                                                        | --- | --- | --- | --- |

|                                        |                                                                                                                                                                                                                                                                                    |       |       |       |       |
|----------------------------------------|------------------------------------------------------------------------------------------------------------------------------------------------------------------------------------------------------------------------------------------------------------------------------------|-------|-------|-------|-------|
|                                        | AltName: Full=Fetuin-A; Flags:<br>Precursor >gi 3980229 emb CAA394<br>98.1  fetuin [Sus scrofa]                                                                                                                                                                                    |       |       |       |       |
| gi 311269753 ref XP_003132<br>624.1    | PREDICTED:<br>alpha-2-HS-glycoprotein [Sus scrofa]                                                                                                                                                                                                                                 |       |       |       |       |
| gi 122131855 sp Q06AB3.1 U<br>CHL3_PIG | RecName: Full=Ubiquitin<br>carboxyl-terminal hydrolase isozyme<br>L3; Short=UCH-L3; AltName:<br>Full=Ubiquitin thioesterase<br>L3 >gi 116175277 ref NP_001070695<br>.1  ubiquitin carboxyl-terminal<br>hydrolase isozyme L3 [Sus<br>scrofa] >gi 115371725 gb ABI96187.<br>1  UCHL3 | ---   | ---   | ---   | ---   |
| gi 350583835 ref XP_003355<br>399.2    | PREDICTED: ADP-ribosylation<br>factor-binding protein GGA1 [Sus<br>scrofa]                                                                                                                                                                                                         | ---   | ---   | ---   | ---   |
| gi 350578554 ref XP_003480<br>390.1    | PREDICTED: talin-2 [Sus scrofa]                                                                                                                                                                                                                                                    | ---   | ---   | ---   | ---   |
| gi 343403848 ref NP_001230<br>297.1    | phosphopantothenoylcysteine<br>decarboxylase [Sus scrofa]                                                                                                                                                                                                                          | ---   | ---   | ---   | ---   |
| gi 311265237 ref XP_003130<br>554.1    | PREDICTED: LOW QUALITY<br>PROTEIN: rab3 GTPase-activating<br>protein non-catalytic subunit-like<br>[Sus scrofa]                                                                                                                                                                    | ---   | ---   | ---   | ---   |
| gi 350587371 ref XP_003482<br>396.1    | PREDICTED: cytosol<br>aminopeptidase-like [Sus scrofa]                                                                                                                                                                                                                             | 2.89  | 2.142 | 2.61  | 1.252 |
| gi 350596353 ref XP_003361<br>080.2    | PREDICTED: gamma-soluble NSF<br>attachment protein-like [Sus scrofa]                                                                                                                                                                                                               | 0.767 | 0.636 | 0.846 | 0.758 |
| gi 38569721 gb AAR24381.1              | isopentyl-diphosphate delta isomerase<br>[Sus scrofa]                                                                                                                                                                                                                              | ---   | ---   | ---   | ---   |
| gi 350589674 ref XP_003482<br>895.1    | PREDICTED:<br>isopentenyl-diphosphate<br>Delta-isomerase 1-like [Sus<br>scrofa] >gi 335296666 ref XP_00335<br>7836.1  PREDICTED:<br>isopentenyl-diphosphate<br>Delta-isomerase 1-like [Sus scrofa]                                                                                 |       |       |       |       |
| gi 350587135 ref XP_003482<br>353.1    | PREDICTED: cleavage and<br>polyadenylation specificity factor<br>subunit 2-like [Sus scrofa]                                                                                                                                                                                       | ---   | ---   | ---   | ---   |
| gi 194034586 ref XP_001925<br>948.1    | PREDICTED:<br>3-ketodihydroshingosine                                                                                                                                                                                                                                              | ---   | ---   | ---   | ---   |

|                                     |                                                                                                                                                                                                                                                           |       |       |       |       |
|-------------------------------------|-----------------------------------------------------------------------------------------------------------------------------------------------------------------------------------------------------------------------------------------------------------|-------|-------|-------|-------|
|                                     | reductase-like [Sus scrofa]                                                                                                                                                                                                                               |       |       |       |       |
| gi 297591981 ref NP_001172068.1     | sialic acid synthase [Sus scrofa] >gi 262204906 dbj BAI48033.1  N-acetylneuraminic acid synthase [Sus scrofa]                                                                                                                                             | ---   | ---   | ---   | ---   |
| gi 311276241 ref XP_003135104.1     | PREDICTED: NADH dehydrogenase [ubiquinone] 1 beta subcomplex subunit 11, mitochondrial-like isoform 1 [Sus scrofa]                                                                                                                                        | ---   | ---   | ---   | ---   |
| gi 311276243 ref XP_003135105.1     | PREDICTED: NADH dehydrogenase [ubiquinone] 1 beta subcomplex subunit 11, mitochondrial-like isoform 2 [Sus scrofa]                                                                                                                                        |       |       |       |       |
| gi 335284154 ref XP_003354525.1     | PREDICTED: solute carrier family 12 member 9-like [Sus scrofa]                                                                                                                                                                                            | ---   | ---   | ---   | ---   |
| gi 335298303 ref XP_003131887.2     | PREDICTED: protein KIAA0664-like [Sus scrofa]                                                                                                                                                                                                             | 0.999 | 1.392 | 1.554 | 1.051 |
| gi 311276865 ref XP_003135390.1     | PREDICTED: 60S ribosomal protein L39-like [Sus scrofa] >gi 335306463 ref XP_003360477.1  PREDICTED: 60S ribosomal protein L39-like [Sus scrofa] >gi 335284542 ref XP_003354632.1  PREDICTED: 60S ribosomal protein L39-like [Sus scrofa] >gi 311247842 re | 0.308 | 0.286 | 0.279 | 0.265 |
| gi 335306465 ref XP_003360478.1     | PREDICTED: 60S ribosomal protein L39-like [Sus scrofa]                                                                                                                                                                                                    |       |       |       |       |
| gi 357580498 sp C5HGF3.1 T MCO1_PIG | RecName: Full=Transmembrane and coiled-coil domains protein 1 >gi 262399400 ref NP_001161057.1  transmembrane and coiled-coil domains protein 1 precursor [Sus scrofa] >gi 225200247 gb ACN82430.1  transmembrane and coiled-coil domains 1 [Sus scrofa]  | ---   | ---   | ---   | ---   |
| gi 350585688 ref XP_003482025.1     | PREDICTED: LOW QUALITY PROTEIN: protein RCC2 [Sus scrofa]                                                                                                                                                                                                 | ---   | ---   | ---   | ---   |
| gi 270289756 ref NP_001161893.1     | endophilin-B1 [Sus scrofa] >gi 262263199 dbj BAI48102.1  SH3-domain GRB2-like endophilin B1 [Sus scrofa]                                                                                                                                                  | ---   | ---   | ---   | ---   |

|                                      |                                                                                                                                                                                                                                                           |       |       |       |       |
|--------------------------------------|-----------------------------------------------------------------------------------------------------------------------------------------------------------------------------------------------------------------------------------------------------------|-------|-------|-------|-------|
| gi 346986269 ref NP_001231292.1      | interferon-induced protein with tetratricopeptide repeats 1 [Sus scrofa]                                                                                                                                                                                  | ---   | ---   | ---   | ---   |
| gi 311274743 ref XP_003134451.1      | PREDICTED: RNA-binding protein Raly isoform 2 [Sus scrofa]                                                                                                                                                                                                | 0.735 | 0.569 | 0.566 | 0.682 |
| gi 335304688 ref XP_003359995.1      | PREDICTED: RNA-binding protein Raly [Sus scrofa] >gi 311274741 ref XP_001929139.2  PREDICTED: RNA-binding protein Raly isoform 1 [Sus scrofa]                                                                                                             |       |       |       |       |
| gi 66866411 gb AA57853.1             | DJ-1 protein, partial [Sus scrofa]                                                                                                                                                                                                                        | ---   | ---   | ---   | ---   |
| gi 194043105 ref XP_001929229.1      | PREDICTED: cob(I)yrinic acid a,c-diamide adenosyltransferase, mitochondrial isoform 1 [Sus scrofa]                                                                                                                                                        | ---   | ---   | ---   | ---   |
| gi 311270785 ref XP_003132971.1      | PREDICTED: cob(I)yrinic acid a,c-diamide adenosyltransferase, mitochondrial isoform 2 [Sus scrofa]                                                                                                                                                        |       |       |       |       |
| gi 350596216 ref XP_003360918.2      | PREDICTED: sorting nexin-2, partial [Sus scrofa]                                                                                                                                                                                                          | ---   | ---   | ---   | ---   |
| gi 311272760 ref XP_001926651.2      | PREDICTED: zinc finger CCCH domain-containing protein 15 [Sus scrofa]                                                                                                                                                                                     | ---   | ---   | ---   | ---   |
| gi 11055649 gb AAG28195.1 AF304201_6 | ATPase 6 [Sus scrofa]                                                                                                                                                                                                                                     | ---   | ---   | ---   | ---   |
| gi 45826189 gb AAS77709.1            | ATP synthase F0 subunit 6 [Sus scrofa]                                                                                                                                                                                                                    |       |       |       |       |
| gi 209166162 gb ACI41537.1           | ATP synthase F0 subunit 6 [Sus scrofa]                                                                                                                                                                                                                    |       |       |       |       |
| gi 118135679 gb ABK62690.1           | ATPase subunit 6 [Sus scrofa]                                                                                                                                                                                                                             |       |       |       |       |
| gi 223976084 ref YP_002600782.1      | ATP synthase F0 subunit 6 [Sus scrofa domesticus] >gi 5835868 ref NP_008639.1 ATP6_15069 ATP synthase F0 subunit 6 [Sus scrofa] >gi 347448701 gb AEO93016.1  ATP synthase F0 subunit 6 (mitochondrion) [Sus scrofa] >gi 347448645 gb AEO92964.1  ATP synt |       |       |       |       |
| gi 251829655 gb ACT21208.1           | ATP synthase F0 subunit 6 [Sus scrofa]                                                                                                                                                                                                                    |       |       |       |       |



|                                      |                                                                                                                                                                                                                                                           |  |  |  |  |
|--------------------------------------|-----------------------------------------------------------------------------------------------------------------------------------------------------------------------------------------------------------------------------------------------------------|--|--|--|--|
| gi 33320871 gb AAQ06154.1            | ATPase subunit 6 [Sus scrofa]                                                                                                                                                                                                                             |  |  |  |  |
| gi 33320927 gb AAQ06206.1            | ATPase subunit 6 [Sus scrofa] >gi 33320689 gb AAQ05985.1  ATPase subunit 6 [Sus scrofa]                                                                                                                                                                   |  |  |  |  |
| gi 145315588 gb ABP63137.1           | ATP synthase F0 subunit 6 [Sus scrofa]                                                                                                                                                                                                                    |  |  |  |  |
| gi 145315644 gb ABP63189.1           | ATP synthase F0 subunit 6 [Sus scrofa] >gi 145315630 gb ABP63176.1  ATP synthase F0 subunit 6 [Sus scrofa]                                                                                                                                                |  |  |  |  |
| gi 157056526 gb ABV02158.1           | ATP synthase F0 subunit 6 [Sus scrofa]                                                                                                                                                                                                                    |  |  |  |  |
| gi 11055677 gb AAG28221.1 AF304203_6 | ATPase 6 [Sus scrofa]                                                                                                                                                                                                                                     |  |  |  |  |
| gi 145315686 gb ABP63228.1           | ATP synthase F0 subunit 6 [Sus scrofa]                                                                                                                                                                                                                    |  |  |  |  |
| gi 290750183 gb ADD52030.1           | ATP synthase subunit 6 [Sus scrofa]                                                                                                                                                                                                                       |  |  |  |  |
| gi 145315658 gb ABP63202.1           | ATP synthase F0 subunit 6 [Sus scrofa]                                                                                                                                                                                                                    |  |  |  |  |
| gi 342316094 gb ABF56565.2           | ATPase subunit 6 [Sus scrofa]                                                                                                                                                                                                                             |  |  |  |  |
| gi 312233369 ref YP_004021580.1      | ATP synthase F0 subunit 6 [Sus scrofa taiwanensis] >gi 347448729 gb AEO93042.1  ATP synthase F0 subunit 6 (mitochondrion) [Sus scrofa] >gi 347448673 gb AEO92990.1  ATP synthase F0 subunit 6 (mitochondrion) [Sus scrofa] >gi 347448743 gb AEO93055.1  A |  |  |  |  |
| gi 145315448 gb ABP63007.1           | ATP synthase F0 subunit 6 [Sus scrofa]                                                                                                                                                                                                                    |  |  |  |  |
| gi 37719398 gb AAR01785.1            | ATP synthase F0 subunit 6 [Sus scrofa]                                                                                                                                                                                                                    |  |  |  |  |
| gi 209166176 gb ACI41550.1           | ATP synthase F0 subunit 6 [Sus scrofa]                                                                                                                                                                                                                    |  |  |  |  |
| gi 80972998 gb ABB53229.1            | ATP synthase F0 subunit 6 [Sus scrofa]                                                                                                                                                                                                                    |  |  |  |  |
| gi 209166246 gb ACI41615.1           | ATP synthase F0 subunit 6 [Sus scrofa] >gi 209166218 gb ACI41589.                                                                                                                                                                                         |  |  |  |  |

|                                 |                                                                                                                                                                                          |       |       |       |       |
|---------------------------------|------------------------------------------------------------------------------------------------------------------------------------------------------------------------------------------|-------|-------|-------|-------|
|                                 | 1  ATP synthase F0 subunit 6 [Sus scrofa] >gi 209166134 gb ACI41511.1  ATP synthase F0 subunit 6 [Sus scrofa] >gi 209166106 gb ACI41485.1  ATP synthase F0 subunit 6 [Sus scrofa] >gi 20 |       |       |       |       |
| gi 76262555 gb ABA41441.1       | ATP synthase F0 subunit 6 [Sus scrofa]                                                                                                                                                   |       |       |       |       |
| gi 157056541 gb ABV02172.1      | ATP synthase F0 subunit 6 [Sus scrofa]                                                                                                                                                   |       |       |       |       |
| gi 45826217 gb AAS77735.1       | ATP synthase F0 subunit 6 [Sus scrofa]                                                                                                                                                   |       |       |       |       |
| gi 315057191 gb ADT71729.1      | ATP synthase subunit 6 [Sus scrofa]                                                                                                                                                      |       |       |       |       |
| gi 94981326 gb ABF49554.1       | ATPase subunit 6 [Sus scrofa] >gi 124249813 gb ABM92886.1  ATPase subunit 6 [Sus scrofa]                                                                                                 |       |       |       |       |
| gi 83779137 gb ABC47381.1       | ATP synthase F0 subunit 6 [Sus scrofa]                                                                                                                                                   |       |       |       |       |
| gi 311257281 ref XP_003127042.1 | PREDICTED: dnaJ homolog subfamily A member 2-like [Sus scrofa]                                                                                                                           | ---   | ---   | ---   | ---   |
| gi 350587021 ref XP_003356786.2 | PREDICTED: MAGUK p55 subfamily member 5 [Sus scrofa]                                                                                                                                     | ---   | ---   | ---   | ---   |
| gi 350591244 ref XP_003483235.1 | PREDICTED: RNA-binding protein 6 isoform 2 [Sus scrofa]                                                                                                                                  | ---   | ---   | ---   | ---   |
| gi 350591246 ref XP_003132268.3 | PREDICTED: RNA-binding protein 6 isoform 1 [Sus scrofa]                                                                                                                                  |       |       |       |       |
| gi 350592445 ref XP_003483465.1 | PREDICTED: hypothetical protein LOC100154492 [Sus scrofa]                                                                                                                                | ---   | ---   | ---   | ---   |
| gi 350592447 ref XP_003483466.1 | PREDICTED: hypothetical protein LOC100154492 [Sus scrofa]                                                                                                                                |       |       |       |       |
| gi 335304534 ref XP_003134355.2 | PREDICTED: 5~-3~ exoribonuclease 2 [Sus scrofa]                                                                                                                                          | ---   | ---   | ---   | ---   |
| gi 194034833 ref XP_001928153.1 | PREDICTED: microfibillar-associated protein 1 [Sus scrofa]                                                                                                                               | 0.905 | 1.801 | 1.48  | 1.208 |
| gi 350578774 ref XP_003480447.1 | PREDICTED: EH domain-containing protein 4, partial [Sus scrofa]                                                                                                                          | ---   | ---   | ---   | ---   |
| gi 350585748 ref XP_003127751.3 | PREDICTED: hypothetical protein LOC100521629 isoform 1 [Sus scrofa]                                                                                                                      | 0.638 | 0.605 | 0.671 | 0.624 |

|                                      |                                                                                                                                                                                                                                                    |     |     |     |     |
|--------------------------------------|----------------------------------------------------------------------------------------------------------------------------------------------------------------------------------------------------------------------------------------------------|-----|-----|-----|-----|
| gi 350585750 ref XP_003482044.1      | PREDICTED: hypothetical protein LOC100521629 isoform 2 [Sus scrofa]                                                                                                                                                                                |     |     |     |     |
| gi 350585912 ref XP_003127855.3      | PREDICTED: microtubule-actin cross-linking factor 1 isoform 1, partial [Sus scrofa]                                                                                                                                                                | --- | --- | --- | --- |
| gi 6166237 sp O19175.1 KC1A_PIG      | RecName: Full=Casein kinase I isoform alpha; Short=CKI-alpha; AltName: Full=CK1                                                                                                                                                                    | --- | --- | --- | --- |
| gi 311250475 ref XP_003124136.1      | PREDICTED: casein kinase I isoform alpha isoform 1 [Sus scrofa]                                                                                                                                                                                    |     |     |     |     |
| gi 350582213 ref XP_003481224.1      | PREDICTED: 60S ribosomal protein L7a-like [Sus scrofa] >gi 350582215 ref XP_003481225.1  PREDICTED: 60S ribosomal protein L7a-like [Sus scrofa] >gi 335285208 ref XP_003125024.2  PREDICTED: 60S ribosomal protein L7a-like isoform 1 [Sus scrofa] | --- | --- | --- | --- |
| gi 311266801 ref XP_003131259.1      | PREDICTED: nuclear pore complex protein Nup85-like [Sus scrofa]                                                                                                                                                                                    | --- | --- | --- | --- |
| gi 350592132 ref XP_003358973.2      | PREDICTED: splicing factor, arginine/serine-rich 15 [Sus scrofa]                                                                                                                                                                                   | --- | --- | --- | --- |
| gi 350578880 ref XP_003480471.1      | PREDICTED: tight junction protein ZO-1-like, partial [Sus scrofa]                                                                                                                                                                                  | --- | --- | --- | --- |
| gi 16506695 gb AAL23907.1 AF339885_1 | mannose-6-phosphate/insulin-like growth factor II receptor [Sus scrofa]                                                                                                                                                                            | --- | --- | --- | --- |
| gi 350577990 ref XP_003480266.1      | PREDICTED: cation-independent mannose-6-phosphate receptor-like [Sus scrofa]                                                                                                                                                                       |     |     |     |     |
| gi 347300273 ref NP_001231402.1      | cation-independent mannose-6-phosphate receptor precursor [Sus scrofa] >gi 334853107 gb AEH05671.1  insulin-like growth factor 2 receptor precursor [Sus scrofa]                                                                                   |     |     |     |     |
| gi 374305556 gb AEZ06359.1           | insulin-like growth factor II receptor [Sus scrofa]                                                                                                                                                                                                |     |     |     |     |
| gi 350588656 ref XP_003357409.2      | PREDICTED: amyloid beta (A4) precursor-like protein 2 [Sus scrofa]                                                                                                                                                                                 | --- | --- | --- | --- |
| gi 311259534 ref XP_003128           | PREDICTED:                                                                                                                                                                                                                                         | --- | --- | --- | --- |

|                                 |                                                                                                                                            |       |       |       |       |
|---------------------------------|--------------------------------------------------------------------------------------------------------------------------------------------|-------|-------|-------|-------|
| 149.1                           | phosphopantothenate--cysteine ligase-like [Sus scrofa]                                                                                     |       |       |       |       |
| gi 194038370 ref XP_001929110.1 | PREDICTED: poly(A) polymerase alpha isoform 1 [Sus scrofa]                                                                                 | 0.607 | 1.121 | 0.874 | 0.836 |
| gi 343403833 ref NP_001230293.1 | coiled-coil domain containing 167 [Sus scrofa]                                                                                             | ---   | ---   | ---   | ---   |
| gi 350586346 ref XP_003482166.1 | PREDICTED: transmembrane and coiled-coil domain-containing protein C6orf129-like, partial [Sus scrofa]                                     |       |       |       |       |
| gi 350594977 ref XP_001929182.3 | PREDICTED: nuclear receptor coactivator 5 [Sus scrofa]                                                                                     | ---   | ---   | ---   | ---   |
| gi 350596467 ref XP_003129178.3 | PREDICTED: fibrinogen alpha chain, partial [Sus scrofa]                                                                                    | ---   | ---   | ---   | ---   |
| gi 346716281 ref NP_001231278.1 | eukaryotic translation initiation factor 1A, Y-linked [Sus scrofa]                                                                         | ---   | ---   | ---   | ---   |
| gi 350586900 ref XP_003128597.3 | PREDICTED: transmembrane 9 superfamily member 1 [Sus scrofa]                                                                               | ---   | ---   | ---   | ---   |
| gi 305855210 ref NP_001182286.1 | DNA mismatch repair protein Msh2 [Sus scrofa] >gi 285818416 gb ADC38881.1  MutS-like protein 2 [Sus scrofa]                                | ---   | ---   | ---   | ---   |
| gi 335299797 ref XP_003358684.1 | PREDICTED: 1-phosphatidylinositol-4,5-bisphosphate phosphodiesterase eta-1 [Sus scrofa]                                                    | ---   | ---   | ---   | ---   |
| gi 350587061 ref XP_003482336.1 | PREDICTED: iron-sulfur cluster assembly 2 homolog, mitochondrial-like [Sus scrofa]                                                         | ---   | ---   | ---   | ---   |
| gi 217314881 gb ACK36975.1      | phosphatidic acid phosphatase type 2C isoform 3 [Sus scrofa]                                                                               | ---   | ---   | ---   | ---   |
| gi 219522016 ref NP_001137195.1 | lipid phosphate phosphohydrolase 2 [Sus scrofa] >gi 217314877 gb ACK36973.1  phosphatidic acid phosphatase type 2C isoform 1 [Sus scrofa]  |       |       |       |       |
| gi 346421308 ref NP_001231011.1 | trans-2-enoyl-CoA reductase, mitochondrial [Sus scrofa]                                                                                    | ---   | ---   | ---   | ---   |
| gi 113205616 ref NP_001038008.1 | 60S ribosomal protein L10 [Sus scrofa] >gi 85681889 sp Q29195.3 RL10_PIG RecName: Full=60S ribosomal protein L10; AltName: Full=Protein QM | ---   | ---   | ---   | ---   |

|                                 |                                                                                                                                                                                                                                                           |       |       |       |       |
|---------------------------------|-----------------------------------------------------------------------------------------------------------------------------------------------------------------------------------------------------------------------------------------------------------|-------|-------|-------|-------|
|                                 | homolog >gi 56384249 gb AAV85773.1  ribosomal protein L10 [Sus scrofa]                                                                                                                                                                                    |       |       |       |       |
| gi 311245451 ref XP_003121835.1 | PREDICTED: 60S ribosomal protein L10-like [Sus scrofa]                                                                                                                                                                                                    |       |       |       |       |
| gi 350579589 ref XP_003353682.2 | PREDICTED: erythrocyte band 7 integral membrane protein-like [Sus scrofa]                                                                                                                                                                                 | ---   | ---   | ---   | ---   |
| gi 350578478 ref XP_003121483.3 | PREDICTED: myosin-Vb-like, partial [Sus scrofa]                                                                                                                                                                                                           | ---   | ---   | ---   | ---   |
| gi 335282227 ref XP_003123029.2 | PREDICTED: switch-associated protein 70-like [Sus scrofa]                                                                                                                                                                                                 | ---   | ---   | ---   | ---   |
| gi 147901025 ref NP_001090949.1 | 40S ribosomal protein S21 [Sus scrofa] >gi 52783791 sp P63221.1 RS21_PIG RecName: Full=40S ribosomal protein S21 >gi 311261595 ref XP_003128784.1  PREDICTED: 40S ribosomal protein S21-like isoform 1 [Sus scrofa] >gi 117661139 gb ABK55656.1  RPS21 [S | 1.084 | 1.406 | 0.892 | 1.171 |
| gi 335281869 ref XP_003353912.1 | PREDICTED: FACT complex subunit SSRP1 [Sus scrofa]                                                                                                                                                                                                        | ---   | ---   | ---   | ---   |
| gi 2833354 sp Q29223.2 RL34_PIG | RecName: Full=60S ribosomal protein L34                                                                                                                                                                                                                   | 0.879 | 0.523 | 0.566 | 0.941 |
| gi 311262701 ref XP_003129308.1 | PREDICTED: 60S ribosomal protein L34-like isoform 2 [Sus scrofa] >gi 311262697 ref XP_003129307.1  PREDICTED: 60S ribosomal protein L34-like isoform 1 [Sus scrofa] >gi 311262699 ref XP_003129309.1  PREDICTED: 60S ribosomal protein L34-like isoform 3 |       |       |       |       |
| gi 350592681 ref XP_003483514.1 | PREDICTED: ubiquitin fusion degradation protein 1 homolog, partial [Sus scrofa]                                                                                                                                                                           | ---   | ---   | ---   | ---   |
| gi 297632410 ref NP_001172089.1 | ADP-ribosylation-like factor 6 interacting protein 4 isoform a [Sus scrofa]                                                                                                                                                                               | ---   | ---   | ---   | ---   |
| gi 297632413 ref NP_001172090.1 | ADP-ribosylation-like factor 6 interacting protein 4 isoform b [Sus scrofa]                                                                                                                                                                               |       |       |       |       |
| gi 335298923 ref XP_003132      | PREDICTED: anoctamin-10 [Sus                                                                                                                                                                                                                              | ---   | ---   | ---   | ---   |

|                                 |                                                                                                                                                               |       |       |       |       |
|---------------------------------|---------------------------------------------------------------------------------------------------------------------------------------------------------------|-------|-------|-------|-------|
| 196.2                           | scrofa]                                                                                                                                                       |       |       |       |       |
| gi 350591798 ref XP_003483335.1 | PREDICTED: replication factor C (activator 1) 4, 37kDa [Sus scrofa]                                                                                           | ---   | ---   | ---   | ---   |
| gi 335308196 ref XP_003361137.1 | PREDICTED: cell division cycle protein 123 homolog [Sus scrofa]                                                                                               | ---   | ---   | ---   | ---   |
| gi 345091069 ref NP_001230752.1 | cell division cycle 123 homolog [Sus scrofa]                                                                                                                  |       |       |       |       |
| gi 350592375 ref XP_001927668.3 | PREDICTED: LOW QUALITY PROTEIN: probable ATP-dependent RNA helicase DDX60 [Sus scrofa]                                                                        | ---   | ---   | ---   | ---   |
| gi 335293236 ref XP_003356909.1 | PREDICTED: ADP-ribosyl cyclase 2-like [Sus scrofa]                                                                                                            | ---   | ---   | ---   | ---   |
| gi 311273371 ref XP_003133833.1 | PREDICTED: NADH dehydrogenase [ubiquinone] 1 alpha subcomplex subunit 10, mitochondrial-like [Sus scrofa]                                                     | 0.942 | 0.553 | 0.566 | 0.856 |
| gi 350594832 ref XP_003134443.3 | PREDICTED: uncharacterized protein C20orf112 homolog [Sus scrofa]                                                                                             | 0.779 | 0.697 | 0.945 | 0.869 |
| gi 343780920 ref NP_001230477.1 | polyadenylate-binding protein 2 [Sus scrofa]                                                                                                                  | ---   | ---   | ---   | ---   |
| gi 335293623 ref XP_003357010.1 | PREDICTED: immunoglobulin J chain-like isoform 2 [Sus scrofa] >gi 335293621 ref XP_003357009.1  PREDICTED: immunoglobulin J chain-like isoform 1 [Sus scrofa] | ---   | ---   | ---   | ---   |
| gi 350579839 ref XP_003353781.2 | PREDICTED: 7-dehydrocholesterol reductase-like [Sus scrofa]                                                                                                   | ---   | ---   | ---   | ---   |
| gi 194044529 ref XP_001925282.1 | PREDICTED: RNA-binding protein 39 isoform 2 [Sus scrofa]                                                                                                      | ---   | ---   | ---   | ---   |
| gi 335304749 ref XP_003360015.1 | PREDICTED: RNA-binding protein 39 [Sus scrofa]                                                                                                                |       |       |       |       |
| gi 335304742 ref XP_003360012.1 | PREDICTED: RNA-binding protein 39 [Sus scrofa]                                                                                                                |       |       |       |       |
| gi 335304745 ref XP_003360013.1 | PREDICTED: RNA-binding protein 39 [Sus scrofa]                                                                                                                |       |       |       |       |
| gi 335280058 ref XP_003121747.2 | PREDICTED: vacuolar protein sorting-associated protein 4B-like [Sus scrofa]                                                                                   | ---   | ---   | ---   | ---   |
| gi 335303022 ref XP_003359611.1 | PREDICTED: LOW QUALITY PROTEIN: WAS/WASL-interacting                                                                                                          | ---   | ---   | ---   | ---   |

|                                     |                                                                                                                                                                                                                                                           |       |       |       |       |
|-------------------------------------|-----------------------------------------------------------------------------------------------------------------------------------------------------------------------------------------------------------------------------------------------------------|-------|-------|-------|-------|
|                                     | protein family member 1-like [Sus scrofa]                                                                                                                                                                                                                 |       |       |       |       |
| gi 311262216 ref XP_003129070.1     | PREDICTED: LOW QUALITY PROTEIN: signal recognition particle 72 kDa protein-like [Sus scrofa]                                                                                                                                                              | 1.184 | 1.064 | 1.23  | 1.278 |
| gi 311270305 ref XP_001926790.2     | PREDICTED: exportin-7 [Sus scrofa]                                                                                                                                                                                                                        | ---   | ---   | ---   | ---   |
| gi 335308535 ref XP_003361271.1     | PREDICTED: N(2),N(2)-dimethylguanosine tRNA methyltransferase-like, partial [Sus scrofa]                                                                                                                                                                  | 0.874 | 1.076 | 1.253 | 1.203 |
| gi 415463 gb AAB28132.1             | cytochrome c oxidase subunit VIIc {N-terminal} [swine, intestine, Peptide, 47 aa]                                                                                                                                                                         | ---   | ---   | ---   | ---   |
| gi 91694325 gb ABE41807.1           | cytochrome c oxidase subunit VIIc [Sus scrofa] >gi 90819632 gb ABD98461.1  cytochrome c oxidase subunit VIIc [Sus scrofa]                                                                                                                                 |       |       |       |       |
| gi 110278917 sp Q1W0Y2.1  COX7C_PIG | RecName: Full=Cytochrome c oxidase subunit 7C, mitochondrial; AltName: Full=Cytochrome c oxidase polypeptide VIIc; Flags: Precursor >gi 147900047 ref NP_001090943.1  cytochrome c oxidase subunit 7C, mitochondrial precursor [Sus scrofa] >gi 117660817 |       |       |       |       |
| gi 335309123 ref XP_003361503.1     | PREDICTED: cytochrome c oxidase subunit 7C, mitochondrial-like [Sus scrofa]                                                                                                                                                                               |       |       |       |       |
| gi 350578030 ref XP_003121180.3     | PREDICTED: cytochrome c oxidase subunit 7C, mitochondrial-like [Sus scrofa]                                                                                                                                                                               |       |       |       |       |
| gi 194039547 ref XP_001928898.1     | PREDICTED: LDLR chaperone MESD [Sus scrofa]                                                                                                                                                                                                               | ---   | ---   | ---   | ---   |
| gi 350593111 ref XP_001927517.4     | PREDICTED: SEC23-interacting protein [Sus scrofa]                                                                                                                                                                                                         | ---   | ---   | ---   | ---   |
| gi 350581370 ref XP_003124307.3     | PREDICTED: MICAL-like protein 2 [Sus scrofa]                                                                                                                                                                                                              | 0.502 | 1.128 | 1.227 | 0.912 |
| gi 350592753 ref XP_001929357.4     | PREDICTED: ankyrin-3 isoform 1 [Sus scrofa]                                                                                                                                                                                                               | ---   | ---   | ---   | ---   |
| gi 350592755 ref XP_003483          | PREDICTED: ankyrin-3 isoform 2                                                                                                                                                                                                                            |       |       |       |       |

|                                      |                                                                                                                                                                                                                                                            |       |       |       |       |
|--------------------------------------|------------------------------------------------------------------------------------------------------------------------------------------------------------------------------------------------------------------------------------------------------------|-------|-------|-------|-------|
| 528.1                                | [Sus scrofa]                                                                                                                                                                                                                                               |       |       |       |       |
| gi 198282001 ref NP_001123683.1      | transcription factor A, mitochondrial precursor [Sus scrofa] >gi 75052621 sp Q5D144.1 T FAM_PIG RecName: Full=Transcription factor A, mitochondrial; Short=mtTFA; Flags: Precursor >gi 60326706 gb AAX18878.1  mitochondrial transcription factor A [Sus s | 0.487 | 0.264 | 0.384 | 0.359 |
| gi 194042017 ref XP_001926614.1      | PREDICTED: structural maintenance of chromosomes protein 3 [Sus scrofa]                                                                                                                                                                                    | ---   | ---   | ---   | ---   |
| gi 350584221 ref XP_003126398.3      | PREDICTED: exportin-T [Sus scrofa]                                                                                                                                                                                                                         | ---   | ---   | ---   | ---   |
| gi 5835872 ref NP_008643.1 ND4_15069 | NADH dehydrogenase subunit 4 [Sus scrofa] >gi 20455496 sp O79881.2 N U4M_PIG RecName: Full=NADH-ubiquinone oxidoreductase chain 4; AltName: Full=NADH dehydrogenase subunit 4 >gi 4958961 gb AAD34194.1 AF034253_10 NADH dehydrogenase subunit 4 [Sus scro | ---   | ---   | ---   | ---   |
| gi 76262531 gb ABA41419.1            | NADH dehydrogenase subunit 4 [Sus scrofa]                                                                                                                                                                                                                  |       |       |       |       |
| gi 251829659 gb ACT21212.1           | NADH dehydrogenase subunit 4 [Sus scrofa]                                                                                                                                                                                                                  |       |       |       |       |
| gi 45826193 gb AAS77713.1            | NADH dehydrogenase subunit 4 [Sus scrofa]                                                                                                                                                                                                                  |       |       |       |       |
| gi 145315786 gb ABP63321.1           | NADH dehydrogenase subunit 4 [Sus scrofa]                                                                                                                                                                                                                  |       |       |       |       |
| gi 118135683 gb ABK62694.1           | NADH dehydrogenase subunit 4 [Sus scrofa]                                                                                                                                                                                                                  |       |       |       |       |
| gi 95116714 gb ABF56569.1            | NADH dehydrogenase subunit 4 [Sus scrofa]                                                                                                                                                                                                                  |       |       |       |       |
| gi 312233373 ref YP_004021584.1      | NADH dehydrogenase subunit 4 [Sus scrofa taiwanensis] >gi 347448733 gb AEO93046.1  NADH dehydrogenase subunit 4 (mitochondrion) [Sus scrofa] >gi 347448677 gb AEO92994.1  NADH dehydrogenase subunit 4                                                     |       |       |       |       |



|                                 |                                                                                                                                                                                                                                                           |  |  |  |  |
|---------------------------------|-----------------------------------------------------------------------------------------------------------------------------------------------------------------------------------------------------------------------------------------------------------|--|--|--|--|
|                                 | (mitochondrion) [Sus scrofa] >gi 347448747 gb AEO9                                                                                                                                                                                                        |  |  |  |  |
| gi 223976088 ref YP_002600786.1 | NADH dehydrogenase subunit 4 [Sus scrofa domesticus] >gi 347448705 gb AEO93020.1  NADH dehydrogenase subunit 4 (mitochondrion) [Sus scrofa] >gi 347448649 gb AEO92968.1  NADH dehydrogenase subunit 4 (mitochondrion) [Sus scrofa] >gi 347448621 gb AEO92 |  |  |  |  |
| gi 45826179 gb AAS77700.1       | NADH dehydrogenase subunit 4 [Sus scrofa]                                                                                                                                                                                                                 |  |  |  |  |
| gi 94981330 gb ABF49558.1       | NADH dehydrogenase subunit 4 [Sus scrofa]                                                                                                                                                                                                                 |  |  |  |  |
| gi 76262559 gb ABA41445.1       | NADH dehydrogenase subunit 4 [Sus scrofa]                                                                                                                                                                                                                 |  |  |  |  |
| gi 162279942 ref YP_001023772.2 | NADH dehydrogenase subunit 4 [Phacochoerus africanus]                                                                                                                                                                                                     |  |  |  |  |
| gi 157056530 gb ABV02162.1      | NADH dehydrogenase subunit 4 [Sus scrofa]                                                                                                                                                                                                                 |  |  |  |  |
| gi 145315774 gb ABP63310.1      | NADH dehydrogenase subunit 4 [Sus scrofa]                                                                                                                                                                                                                 |  |  |  |  |
| gi 162423277 gb ABX89418.1      | NADH dehydrogenase subunit 4 [Sus scrofa]                                                                                                                                                                                                                 |  |  |  |  |
| gi 76262545 gb ABA41432.1       | NADH dehydrogenase subunit 4 [Sus scrofa]                                                                                                                                                                                                                 |  |  |  |  |
| gi 37962878 gb AAR05791.1       | NADH dehydrogenase subunit 4 [Sus scrofa]                                                                                                                                                                                                                 |  |  |  |  |
| gi 80973002 gb ABB53233.1       | NADH dehydrogenase subunit 4 [Sus scrofa]                                                                                                                                                                                                                 |  |  |  |  |
| gi 238625892 gb ACR48218.1      | NADH dehydrogenase subunit 4 [Sus scrofa]                                                                                                                                                                                                                 |  |  |  |  |
| gi 159162014 gb ABM92890.2      | NADH dehydrogenase subunit 4 [Sus scrofa]                                                                                                                                                                                                                 |  |  |  |  |
| gi 45826207 gb AAS77726.1       | NADH dehydrogenase subunit 4 [Sus scrofa]                                                                                                                                                                                                                 |  |  |  |  |
| gi 37719402 gb AAR01789.1       | NADH dehydrogenase subunit 4 [Sus scrofa]                                                                                                                                                                                                                 |  |  |  |  |
| gi 83779155 gb ABC47398.1       | NADH dehydrogenase subunit 4 [Sus scrofa]                                                                                                                                                                                                                 |  |  |  |  |
| gi 45826221 gb AAS77739.1       | NADH dehydrogenase subunit 4 [Sus                                                                                                                                                                                                                         |  |  |  |  |

|                                   |                                                                                                                                                                                                                                                              |     |     |     |     |
|-----------------------------------|--------------------------------------------------------------------------------------------------------------------------------------------------------------------------------------------------------------------------------------------------------------|-----|-----|-----|-----|
|                                   | scrofa]                                                                                                                                                                                                                                                      |     |     |     |     |
| gi 161777647 gb ABX79190.1        | N-acetylneuraminic acid hydroxylase variant 3 [Sus scrofa]                                                                                                                                                                                                   | --- | --- | --- | --- |
| gi 73918051 sp O19074.1 CM AH_PIG | RecName: Full=Cytidine monophosphate-N-acetylneuraminic acid hydroxylase;<br>Short=CMP-N-acetylneuraminic acid hydroxylase; AltName: Full=CMP-N-acetylneuraminate monooxygenase; AltName: Full=CMP-Neu5Ac hydroxylase; AltName: Full=CMP-NeuAc hydroxylase > |     |     |     |     |
| gi 163915137 ref NP_001106486.1   | cytidine monophosphate-N-acetylneuraminic acid hydroxylase [Sus scrofa] >gi 158726707 gb ABW80749.1  CMP-N-acetylneuraminic acid hydroxylase [Sus scrofa]                                                                                                    |     |     |     |     |
| gi 350585957 ref XP_003482084.1   | PREDICTED: LOW QUALITY PROTEIN: AFG3-like protein 2, partial [Sus scrofa]                                                                                                                                                                                    | --- | --- | --- | --- |
| gi 47522752 ref NP_999126.1       | optineurin [Sus scrofa] >gi 62286962 sp Q7YS99.1 O PTN_PIG RecName: Full=Optineurin >gi 31324103 gb AAP47176.1 AF513722_1 optineurin [Sus scrofa]                                                                                                            | --- | --- | --- | --- |
| gi 350584686 ref XP_003481803.1   | PREDICTED: polypeptide N-acetylgalactosaminyltransferase 4 isoform 2 [Sus scrofa]                                                                                                                                                                            | --- | --- | --- | --- |
| gi 350596113 ref XP_003360781.2   | PREDICTED: polypeptide N-acetylgalactosaminyltransferase 4-like [Sus scrofa] >gi 350584684 ref XP_003481802.1  PREDICTED: polypeptide N-acetylgalactosaminyltransferase 4 isoform 1 [Sus scrofa]                                                             |     |     |     |     |
| gi 346421398 ref NP_001231071.1   | sorcini isoform 1 [Sus scrofa]                                                                                                                                                                                                                               | --- | --- | --- | --- |
| gi 346644814 ref NP_001231072.1   | sorcini isoform 2 [Sus scrofa]                                                                                                                                                                                                                               |     |     |     |     |
| gi 68534998 ref NP_0010203        | nuclear receptor coactivator 1 [Sus                                                                                                                                                                                                                          | --- | --- | --- | --- |

|                                     |                                                                                                                                                                                                                                            |       |       |       |       |
|-------------------------------------|--------------------------------------------------------------------------------------------------------------------------------------------------------------------------------------------------------------------------------------------|-------|-------|-------|-------|
| 99.1                                | scrofa] >gi 75075065 sp Q4P JW2.1 N<br>COA1_PIG RecName: Full=Nuclear<br>receptor coactivator 1;<br>Short=NCoA-1; AltName:<br>Full=Steroid receptor coactivator 1;<br>Short=SRC-1 >gi 67866953 gb AAY8<br>2453.1  nuclear receptor coactiv |       |       |       |       |
| gi 164523392 gb ABY60786.<br>1      | steroid receptor coactivator 1 isoform<br>2 [Sus scrofa]                                                                                                                                                                                   |       |       |       |       |
| gi 164523390 gb ABY60785.<br>1      | steroid receptor coactivator 1 isoform<br>1 [Sus scrofa]                                                                                                                                                                                   |       |       |       |       |
| gi 350578786 ref XP_003121<br>657.3 | PREDICTED: RNA<br>polymerase-associated protein RTF1<br>homolog [Sus scrofa]                                                                                                                                                               | ---   | ---   | ---   | ---   |
| gi 350581632 ref XP_003124<br>588.3 | PREDICTED: hypothetical protein<br>LOC100521783 isoform 1 [Sus<br>scrofa]                                                                                                                                                                  | ---   | ---   | ---   | ---   |
| gi 311276906 ref XP_001924<br>366.2 | PREDICTED: THO complex subunit<br>2 [Sus scrofa]                                                                                                                                                                                           | ---   | ---   | ---   | ---   |
| gi 350587373 ref XP_003128<br>918.3 | PREDICTED: condensin complex<br>subunit 3 [Sus scrofa]                                                                                                                                                                                     | ---   | ---   | ---   | ---   |
| gi 194041854 ref XP_001929<br>564.1 | PREDICTED: biogenesis of<br>lysosome-related organelles<br>complex-1 subunit 2 [Sus scrofa]                                                                                                                                                | ---   | ---   | ---   | ---   |
| gi 350595685 ref XP_003135<br>150.3 | PREDICTED: E3 ubiquitin-protein<br>ligase HUWE1-like [Sus scrofa]                                                                                                                                                                          | ---   | ---   | ---   | ---   |
| gi 311269675 ref XP_003132<br>593.1 | PREDICTED: actin-like 6A isoform<br>1 [Sus scrofa]                                                                                                                                                                                         | ---   | ---   | ---   | ---   |
| gi 343962595 ref NP_001230<br>634.1 | thioredoxin, mitochondrial [Sus<br>scrofa]                                                                                                                                                                                                 | 1.024 | 1.646 | 1.288 | 1.379 |
| gi 350591320 ref XP_003132<br>344.3 | PREDICTED: 26S proteasome<br>non-ATPase regulatory subunit 6<br>[Sus scrofa]                                                                                                                                                               | 1.844 | 1.187 | 0.979 | 1.468 |
| gi 298160941 ref NP_001177<br>148.1 | pterin-4 alpha-carbinolamine<br>dehydratase/dimerization cofactor of<br>hepatocyte nuclear factor 1 alpha [Sus<br>scrofa]                                                                                                                  | 1.246 | 1.287 | 1.274 | 1.312 |
| gi 350585782 ref XP_003127<br>781.3 | PREDICTED: AT-rich interactive<br>domain-containing protein 1A, partial<br>[Sus scrofa]                                                                                                                                                    | ---   | ---   | ---   | ---   |
| gi 38488989 tpg DAA01973.<br>1      | TPA_inf: RTN4-Aw [Sus scrofa]                                                                                                                                                                                                              | ---   | ---   | ---   | ---   |

|                                 |                                                                                                                                                                                       |     |     |     |     |
|---------------------------------|---------------------------------------------------------------------------------------------------------------------------------------------------------------------------------------|-----|-----|-----|-----|
| gi 194018686 ref NP_001123435.1 | reticulon-4 [Sus scrofa] >gi 38327590 tpg DAA01967.1  TPA_inf: RTN4-C [Sus scrofa]                                                                                                    |     |     |     |     |
| gi 219521986 ref NP_001137180.1 | glycerol kinase [Sus scrofa] >gi 217314913 gb ACK36991.1  glycerol kinase [Sus scrofa]                                                                                                | --- | --- | --- | --- |
| gi 311273120 ref XP_003133723.1 | PREDICTED: glycerol kinase-like [Sus scrofa]                                                                                                                                          |     |     |     |     |
| gi 311264064 ref XP_003129981.1 | PREDICTED: Na(+)/H(+) exchange regulatory cofactor NHE-RF4 isoform 1 [Sus scrofa]                                                                                                     | --- | --- | --- | --- |
| gi 311264066 ref XP_003129982.1 | PREDICTED: Na(+)/H(+) exchange regulatory cofactor NHE-RF4 isoform 2 [Sus scrofa]                                                                                                     |     |     |     |     |
| gi 3288634 emb CAA04598.1       | Bak protein [Sus scrofa]                                                                                                                                                              | --- | --- | --- | --- |
| gi 194040311 ref XP_001928182.1 | PREDICTED: putative Bcl-2 homologous antagonist/killer 2 [Sus scrofa]                                                                                                                 |     |     |     |     |
| gi 335294984 ref XP_003357369.1 | PREDICTED: trehalase [Sus scrofa]                                                                                                                                                     | --- | --- | --- | --- |
| gi 221325626 ref NP_001138314.1 | NADH dehydrogenase [ubiquinone] 1 beta subcomplex subunit 8, mitochondrial [Sus scrofa] >gi 219563064 gb ACL27891.1  NADH dehydrogenase (ubiquinone) 1 beta subcomplex 8 [Sus scrofa] | --- | --- | --- | --- |
| gi 335283923 ref XP_003354462.1 | PREDICTED: plakophilin-3-like [Sus scrofa]                                                                                                                                            | --- | --- | --- | --- |
| gi 311268067 ref XP_003131870.1 | PREDICTED: replication protein A 70 kDa DNA-binding subunit [Sus scrofa]                                                                                                              | --- | --- | --- | --- |
| gi 335293447 ref XP_003129021.2 | PREDICTED: ubiquitin carboxyl-terminal hydrolase 46 [Sus scrofa]                                                                                                                      | --- | --- | --- | --- |
| gi 335296741 ref XP_003130951.2 | PREDICTED: ubiquitin carboxyl-terminal hydrolase 12 [Sus scrofa]                                                                                                                      |     |     |     |     |
| gi 335295199 ref XP_003357427.1 | PREDICTED: zinc finger CCCH domain-containing protein 11A isoform 2 [Sus                                                                                                              | --- | --- | --- | --- |

|                                 |                                                                                                                                                                                     |     |     |     |     |
|---------------------------------|-------------------------------------------------------------------------------------------------------------------------------------------------------------------------------------|-----|-----|-----|-----|
|                                 | scrofa] >gi 335295197 ref XP_003357426.1  PREDICTED: zinc finger CCCH domain-containing protein 11A isoform 1 [Sus scrofa]                                                          |     |     |     |     |
| gi 222136636 ref NP_001138402.1 | nuclear transcription factor Y subunit beta [Sus scrofa]                                                                                                                            | --- | --- | --- | --- |
| gi 335310220 ref XP_003361935.1 | PREDICTED: elongation factor Ts, mitochondrial-like, partial [Sus scrofa]                                                                                                           | --- | --- | --- | --- |
| gi 311258370 ref XP_003127581.1 | PREDICTED: pleckstrin homology domain-containing family G member 5 [Sus scrofa]                                                                                                     | --- | --- | --- | --- |
| gi 343790928 ref NP_001230520.1 | mini-chromosome maintenance complex-binding protein [Sus scrofa]                                                                                                                    | --- | --- | --- | --- |
| gi 311266774 ref XP_003131239.1 | PREDICTED: WW domain-binding protein 2-like [Sus scrofa]                                                                                                                            | --- | --- | --- | --- |
| gi 345091084 ref NP_001230758.1 | RNA binding motif protein 25 [Sus scrofa]                                                                                                                                           | --- | --- | --- | --- |
| gi 350596600 ref XP_003128714.3 | PREDICTED: RNA-binding protein 25, partial [Sus scrofa]                                                                                                                             |     |     |     |     |
| gi 229892828 ref NP_001153565.1 | protein arginine N-methyltransferase 5 [Sus scrofa] >gi 197692948 gb ACH71262.1  protein arginine methyltransferase 5 [Sus scrofa]                                                  | --- | --- | --- | --- |
| gi 194036657 ref XP_001928045.1 | PREDICTED: brefeldin A-inhibited guanine nucleotide-exchange protein 1 [Sus scrofa]                                                                                                 | --- | --- | --- | --- |
| gi 55741851 ref NP_001001264.1  | Wilms tumor protein homolog [Sus scrofa] >gi 3915298 sp O62651.1 WT1_PIG RecName: Full=Wilms tumor protein homolog >gi 3132272 dbj BAA28147.1  unnamed protein product [Sus scrofa] | --- | --- | --- | --- |
| gi 98283612 gb ABF58000.1       | mitochondrial NAD+isocitrate dehydrogenase 3 beta variant 1 [Sus scrofa]                                                                                                            | --- | --- | --- | --- |
| gi 98283616 gb ABF58003.1       | mitochondrial NAD+isocitrate dehydrogenase 3 beta variant 1 [Sus scrofa]                                                                                                            |     |     |     |     |
| gi 98283613 gb ABF58001.1       | mitochondrial NAD+isocitrate                                                                                                                                                        |     |     |     |     |

|                                 |                                                                                                                                                                                                                                                             |     |     |     |     |
|---------------------------------|-------------------------------------------------------------------------------------------------------------------------------------------------------------------------------------------------------------------------------------------------------------|-----|-----|-----|-----|
|                                 | dehydrogenase 3 beta variant 2 [Sus scrofa] >gi 98283614 gb ABF58002.1   mitochondrial NAD+isocitrate dehydrogenase 3 beta variant 3 [Sus scrofa]                                                                                                           |     |     |     |     |
| gi 113205754 ref NP_001038040.1 | isocitrate dehydrogenase [NAD] subunit beta, mitochondrial [Sus scrofa] >gi 98283620 gb ABF58005.1   mitochondrial NAD+isocitrate dehydrogenase 3 beta variant 3 [Sus scrofa] >gi 98283618 gb ABF58004.1   mitochondrial NAD+isocitrate dehydrogenase 3 bet |     |     |     |     |
| gi 335309458 ref XP_003361645.1 | PREDICTED: isocitrate dehydrogenase [NAD] subunit beta, mitochondrial-like [Sus scrofa]                                                                                                                                                                     |     |     |     |     |
| gi 350583819 ref XP_003126103.3 | PREDICTED: brain-specific angiogenesis inhibitor 1-associated protein 2-like protein 2-like, partial [Sus scrofa]                                                                                                                                           | --- | --- | --- | --- |
| gi 350584473 ref XP_003126641.3 | PREDICTED: V-type proton ATPase subunit E 1 isoform 2 [Sus scrofa]                                                                                                                                                                                          | --- | --- | --- | --- |
| gi 350584475 ref XP_003481754.1 | PREDICTED: V-type proton ATPase subunit E 1 [Sus scrofa]                                                                                                                                                                                                    |     |     |     |     |
| gi 39646090 emb CAE83881.1      | unnamed protein product [Sus scrofa]                                                                                                                                                                                                                        | --- | --- | --- | --- |
| gi 47523636 ref NP_999446.1     | complement factor H precursor [Sus scrofa] >gi 21464594 emb CAC81999.1  complement regulator factor H [Sus scrofa]                                                                                                                                          |     |     |     |     |
| gi 346644842 ref NP_001231175.1 | NOP2 nucleolar protein homolog [Sus scrofa]                                                                                                                                                                                                                 | --- | --- | --- | --- |
| gi 347922122 ref NP_001231672.1 | NADH dehydrogenase (ubiquinone) 1, subcomplex unknown, 2, 14.5kDa [Sus scrofa] >gi 350588320 ref XP_003482623.1  PREDICTED: NADH dehydrogenase [ubiquinone] 1 subunit C2-like isoform 1 [Sus scrofa]                                                        | --- | --- | --- | --- |
| gi 350588322 ref XP_003482624.1 | PREDICTED: NADH dehydrogenase [ubiquinone] 1 subunit C2-like isoform 2 [Sus scrofa]                                                                                                                                                                         |     |     |     |     |

|                                       |                                                                                                                                                                                                                                                                                   |       |       |       |       |
|---------------------------------------|-----------------------------------------------------------------------------------------------------------------------------------------------------------------------------------------------------------------------------------------------------------------------------------|-------|-------|-------|-------|
| gi 187470928 sp A5A779.1 P<br>GTA_PIG | RecName: Full=Geranylgeranyl<br>transferase type-2 subunit alpha;<br>AltName: Full=Geranylgeranyl<br>transferase type II subunit alpha;<br>AltName: Full=Rab<br>geranyl-geranyltransferase subunit<br>alpha; Short=Rab GG transferase<br>alpha; Short=Rab GGTase alpha;<br>AltNam | ---   | ---   | ---   | ---   |
| gi 297747277 ref NP_001172<br>107.1   | NADH dehydrogenase (ubiquinone) 1<br>alpha subcomplex, 6, 14kDa [Sus<br>scrofa] >gi 350583744 ref XP_00348<br>1577.1  PREDICTED: NADH<br>dehydrogenase [ubiquinone] 1 alpha<br>subcomplex subunit 6-like [Sus<br>scrofa]                                                          | ---   | ---   | ---   | ---   |
| gi 335310969 ref XP_001928<br>237.3   | PREDICTED: NADH dehydrogenase<br>[ubiquinone] 1 alpha subcomplex<br>subunit 6-like, partial [Sus scrofa]                                                                                                                                                                          |       |       |       |       |
| gi 346986447 ref NP_001231<br>373.1   | ribonuclease H2 subunit A [Sus<br>scrofa]                                                                                                                                                                                                                                         | 0.934 | 1.495 | 0.612 | 0.901 |
| gi 335282567 ref XP_003123<br>239.2   | PREDICTED: evolutionarily<br>conserved signaling intermediate in<br>Toll pathway, mitochondrial-like [Sus<br>scrofa]                                                                                                                                                              | ---   | ---   | ---   | ---   |
| gi 311267157 ref XP_003131<br>429.1   | PREDICTED: coiled-coil<br>domain-containing protein 56-like<br>[Sus scrofa]                                                                                                                                                                                                       | ---   | ---   | ---   | ---   |
| gi 350583671 ref XP_003125<br>970.3   | PREDICTED: interferon-induced<br>guanylate-binding protein 2-like<br>isoform 2, partial [Sus scrofa]                                                                                                                                                                              | ---   | ---   | ---   | ---   |
| gi 311264070 ref XP_003129<br>980.1   | PREDICTED: E3 ubiquitin-protein<br>ligase CBL [Sus scrofa]                                                                                                                                                                                                                        | ---   | ---   | ---   | ---   |
| gi 335296877 ref XP_003357<br>884.1   | PREDICTED: cytidine and dCMP<br>deaminase domain-containing protein<br>1-like [Sus scrofa]                                                                                                                                                                                        | ---   | ---   | ---   | ---   |
| gi 335292471 ref XP_001927<br>834.3   | PREDICTED: signal recognition<br>particle 54 kDa protein isoform 1<br>[Sus scrofa]                                                                                                                                                                                                | ---   | ---   | ---   | ---   |
| gi 335292473 ref XP_003356<br>739.1   | PREDICTED: signal recognition<br>particle 54 kDa protein [Sus scrofa]                                                                                                                                                                                                             |       |       |       |       |
| gi 350589889 ref XP_003482<br>942.1   | PREDICTED: TSC22 domain family<br>protein 1-like [Sus scrofa]                                                                                                                                                                                                                     | ---   | ---   | ---   | ---   |

|                                 |                                                                                                                                                                                                                                                            |       |       |       |       |
|---------------------------------|------------------------------------------------------------------------------------------------------------------------------------------------------------------------------------------------------------------------------------------------------------|-------|-------|-------|-------|
| gi 311260236 ref XP_001925503.2 | PREDICTED: tapasin-like [Sus scrofa]                                                                                                                                                                                                                       | ---   | ---   | ---   | ---   |
| gi 350589164 ref XP_003357646.2 | PREDICTED: acyl-CoA:lysophosphatidylglycerol acyltransferase 1-like [Sus scrofa]                                                                                                                                                                           | ---   | ---   | ---   | ---   |
| gi 311246039 ref XP_003122046.1 | PREDICTED: golgi-associated plant pathogenesis-related protein 1-like [Sus scrofa]                                                                                                                                                                         | ---   | ---   | ---   | ---   |
| gi 350579373 ref XP_003480598.1 | PREDICTED: golgi-associated plant pathogenesis-related protein 1-like, partial [Sus scrofa]                                                                                                                                                                |       |       |       |       |
| gi 148222591 ref NP_001090955.1 | ATPase inhibitor, mitochondrial precursor [Sus scrofa] >gi 148887342 sp Q29307.2 A TIF1_PIG RecName: Full=ATPase inhibitor, mitochondrial; AltName: Full=Inhibitor of F(1)F(o)-ATPase; Short=IF(1); Short=IF1; Flags: Precursor >gi 117661240 gb ABK55664. | ---   | ---   | ---   | ---   |
| gi 350590642 ref XP_003131789.3 | PREDICTED: 26S proteasome non-ATPase regulatory subunit 11-like [Sus scrofa]                                                                                                                                                                               | ---   | ---   | ---   | ---   |
| gi 335310105 ref XP_003361889.1 | PREDICTED: acyl-CoA dehydrogenase family member 10-like, partial [Sus scrofa]                                                                                                                                                                              | ---   | ---   | ---   | ---   |
| gi 148233298 ref NP_001090954.1 | heat shock factor-binding protein 1 [Sus scrofa] >gi 117661226 gb ABK55663.1  HSBP1 [Sus scrofa]                                                                                                                                                           | ---   | ---   | ---   | ---   |
| gi 311247522 ref XP_003122684.1 | PREDICTED: succinate dehydrogenase assembly factor 2, mitochondrial-like [Sus scrofa]                                                                                                                                                                      | ---   | ---   | ---   | ---   |
| gi 335289736 ref XP_003127196.2 | PREDICTED: inositol-trisphosphate 3-kinase C [Sus scrofa]                                                                                                                                                                                                  | ---   | ---   | ---   | ---   |
| gi 335280193 ref XP_003121819.2 | PREDICTED: cutaneous T-cell lymphoma-associated antigen 5-like isoform 1 [Sus scrofa] >gi 335280187 ref XP_003353518.1  PREDICTED: cutaneous T-cell lymphoma-associated antigen 5 isoform 2 [Sus scrofa]                                                   | 0.991 | 0.752 | 0.959 | 0.889 |
| gi 335280195 ref XP_003353      | PREDICTED: cutaneous T-cell                                                                                                                                                                                                                                |       |       |       |       |



|                                 |                                                                                                                                                                                                                                                           |       |       |       |       |
|---------------------------------|-----------------------------------------------------------------------------------------------------------------------------------------------------------------------------------------------------------------------------------------------------------|-------|-------|-------|-------|
| 520.1                           | lymphoma-associated antigen 5-like isoform 2 [Sus scrofa] >gi 335280191 ref XP_003353519.1  PREDICTED: cutaneous T-cell lymphoma-associated antigen 5 isoform 3 [Sus scrofa]                                                                              |       |       |       |       |
| gi 211578376 ref NP_001129984.1 | beta,beta-carotene 15,15~-monooxygenase [Sus scrofa] >gi 209571749 gb ACI62530.1  beta-carotene 15,15~-monooxygenase 1 [Sus scrofa]                                                                                                                       | 1.281 | 1.155 | 1.164 | 1.667 |
| gi 311247444 ref XP_003122650.1 | PREDICTED: reticulon-3 isoform 1 [Sus scrofa]                                                                                                                                                                                                             | ---   | ---   | ---   | ---   |
| gi 47523756 ref NP_999514.1     | pyruvate carboxylase, mitochondrial [Sus scrofa] >gi 300632138 emb CBU89073.1  unnamed protein product [Sus scrofa] >gi 300628626 emb CBU85988.1  unnamed protein product [Sus scrofa] >gi 300641281 emb CBU93285.1  unnamed protein product [Sus scrofa] | ---   | ---   | ---   | ---   |
| gi 335292522 ref XP_001924480.2 | PREDICTED: proteasome subunit beta type-5 [Sus scrofa]                                                                                                                                                                                                    | ---   | ---   | ---   | ---   |
| gi 335310829 ref XP_003362211.1 | PREDICTED: ubiquitin carboxyl-terminal hydrolase 14-like [Sus scrofa]                                                                                                                                                                                     | 1.053 | 0.697 | 1.262 | 0.778 |
| gi 311244988 ref XP_003121641.1 | PREDICTED: regulator of microtubule dynamics protein 3-like [Sus scrofa]                                                                                                                                                                                  | ---   | ---   | ---   | ---   |
| gi 311260254 ref XP_003128393.1 | PREDICTED: inositol 1,4,5-trisphosphate receptor type 3 [Sus scrofa]                                                                                                                                                                                      | ---   | ---   | ---   | ---   |
| gi 163915153 ref NP_001106524.1 | NF-kappa-B essential modulator [Sus scrofa] >gi 161137769 gb ABX57883.1  inhibitor of kappa light polypeptide gene enhancer in B-cells kinase gamma [Sus scrofa]                                                                                          | ---   | ---   | ---   | ---   |
| gi 166079195 gb ABY81299.1      | inhibitor of kappa light polypeptide gene enhancer in B-cells kinase gamma transcript variant 1 [Sus scrofa]                                                                                                                                              |       |       |       |       |

|                                 |                                                                                                                                                                                                                                                            |       |      |      |       |
|---------------------------------|------------------------------------------------------------------------------------------------------------------------------------------------------------------------------------------------------------------------------------------------------------|-------|------|------|-------|
| gi 34810486 pdb 1NX2 A          | Chain A, Calpain Domain Vi >gi 34810482 pdb 1NX1 A Chain A, Calpain Domain Vi Complexed With Calpastatin Inhibitory Domain C (Dic) >gi 34810478 pdb 1NX0 B Chain B, Structure Of Calpain Domain 6 In Complex With Calpastatin Dic >gi 3319069 pdb 1ALV B   | 0.843 | 0.93 | 1.21 | 1.038 |
| gi 47523694 ref NP_999483.1     | calpain small subunit 1 [Sus scrofa] >gi 115613 sp P04574.1 CPN S1_PIG RecName: Full=Calpain small subunit 1; Short=CSS1; AltName: Full=Calcium-activated neutral proteinase small subunit; Short=CANP small subunit; AltName: Full=Calcium-dependent prot |       |      |      |       |
| gi 219521950 ref NP_001137167.1 | acetyl-coenzyme A synthetase, cytoplasmic [Sus scrofa] >gi 217039101 gb ACJ76839.1  acyl-CoA synthetase short-chain family member 2 [Sus scrofa]                                                                                                           | ---   | ---  | ---  | ---   |
| gi 350583332 ref XP_001927031.4 | PREDICTED: pre-B-cell leukemia transcription factor-interacting protein 1-like [Sus scrofa]                                                                                                                                                                | ---   | ---  | ---  | ---   |
| gi 6174950 sp P79324.1 RL15_PIG | RecName: Full=60S ribosomal protein L15                                                                                                                                                                                                                    | ---   | ---  | ---  | ---   |
| gi 346227216 ref NP_001230994.1 | ribosomal protein L15 [Sus scrofa] >gi 335298742 ref XP_003358383.1  PREDICTED: 60S ribosomal protein L15-like isoform 1 [Sus scrofa] >gi 335298744 ref XP_003358384.1  PREDICTED: 60S ribosomal protein L15-like isoform 2 [Sus scrofa]                   |       |      |      |       |
| gi 311252561 ref XP_003125153.1 | PREDICTED: prefoldin subunit 1-like [Sus scrofa]                                                                                                                                                                                                           | ---   | ---  | ---  | ---   |
| gi 350581165 ref XP_003480975.1 | PREDICTED: prefoldin subunit 1-like [Sus scrofa]                                                                                                                                                                                                           |       |      |      |       |
| gi 350584178 ref XP_003481687.1 | PREDICTED: prolown-density lipoprotein receptor-related protein 1-like [Sus scrofa]                                                                                                                                                                        | ---   | ---  | ---  | ---   |

|                                     |                                                                                                                                                                                                                                                           |       |       |       |       |
|-------------------------------------|-----------------------------------------------------------------------------------------------------------------------------------------------------------------------------------------------------------------------------------------------------------|-------|-------|-------|-------|
| gi 7716549 gb AAF68430.1 AF239165_1 | serine hydroxymethyltransferase, partial [Sus scrofa]                                                                                                                                                                                                     | ---   | ---   | ---   | ---   |
| gi 47523070 ref NP_999298.1         | pantetheinase precursor [Sus scrofa] >gi 46577140 sp Q9BDJ5.1 VNN1_PIG RecName: Full=Pantetheinase; AltName: Full=Pantetheine hydrolase; AltName: Full=Vascular non-inflammatory molecule 1; Short=Vanin-1; Flags: Precursor >gi 13655618 gb AAK29437.2 A | ---   | ---   | ---   | ---   |
| gi 194035771 ref XP_001927964.1     | PREDICTED: guanylate-binding protein 4 [Sus scrofa]                                                                                                                                                                                                       | 1.152 | 1.559 | 1.072 | 0.948 |
| gi 311256822 ref XP_003126824.1     | PREDICTED: histone deacetylase 10-like [Sus scrofa]                                                                                                                                                                                                       | ---   | ---   | ---   | ---   |
| gi 335310624 ref XP_003362118.1     | PREDICTED: histone deacetylase 10-like [Sus scrofa]                                                                                                                                                                                                       |       |       |       |       |
| gi 164414802 pdb 2RME A             | Chain A, Stressin                                                                                                                                                                                                                                         | ---   | ---   | ---   | ---   |
| gi 311248590 ref XP_003123248.1     | PREDICTED: mitochondrial import inner membrane translocase subunit TIM44 [Sus scrofa]                                                                                                                                                                     | ---   | ---   | ---   | ---   |
| gi 335298785 ref XP_003132130.2     | PREDICTED: COX assembly mitochondrial protein homolog [Sus scrofa]                                                                                                                                                                                        | ---   | ---   | ---   | ---   |
| gi 335308716 ref XP_003361344.1     | PREDICTED: selenide, water dikinase 1, partial [Sus scrofa]                                                                                                                                                                                               | ---   | ---   | ---   | ---   |
| gi 335281875 ref XP_003353915.1     | PREDICTED: proteoglycan 3-like [Sus scrofa]                                                                                                                                                                                                               | ---   | ---   | ---   | ---   |
| gi 311272131 ref XP_003133314.1     | PREDICTED: aspartyl-tRNA synthetase, cytoplasmic-like isoform 1 [Sus scrofa]                                                                                                                                                                              | 0.967 | 0.599 | 0.349 | 0.865 |
| gi 335302484 ref XP_003359474.1     | PREDICTED: aspartyl-tRNA synthetase, cytoplasmic-like isoform 2 [Sus scrofa]                                                                                                                                                                              |       |       |       |       |
| gi 350587769 ref XP_003129218.3     | PREDICTED: ATP-binding cassette sub-family E member 1 [Sus scrofa]                                                                                                                                                                                        | ---   | ---   | ---   | ---   |
| gi 311275848 ref XP_003134937.1     | PREDICTED: biliverdin reductase A-like [Sus scrofa]                                                                                                                                                                                                       | ---   | ---   | ---   | ---   |
| gi 311271149 ref XP_003133065.1     | PREDICTED: uncharacterized protein C1orf31 homolog [Sus scrofa]                                                                                                                                                                                           | ---   | ---   | ---   | ---   |
| gi 335301594 ref XP_003359          | PREDICTED: uncharacterized                                                                                                                                                                                                                                |       |       |       |       |

|                                 |                                                                                                                                                                                                                                                           |     |     |     |     |
|---------------------------------|-----------------------------------------------------------------------------------------------------------------------------------------------------------------------------------------------------------------------------------------------------------|-----|-----|-----|-----|
| 243.1                           | protein C1orf31 homolog [Sus scrofa] >gi 335301592 ref XP_003359242.1  PREDICTED: uncharacterized protein C1orf31 homolog [Sus scrofa]                                                                                                                    |     |     |     |     |
| gi 346716287 ref NP_001231279.1 | carboxymethylenebutenolidase homolog [Sus scrofa]                                                                                                                                                                                                         | --- | --- | --- | --- |
| gi 47522956 ref NP_999236.1     | N-acetylneuraminate lyase [Sus scrofa] >gi 75049298 sp Q9BEC7.1 NPL_PIG RecName: Full=N-acetylneuraminate lyase; Short=NALase; AltName: Full=N-acetylneuraminate pyruvate-lyase; AltName: Full=N-acetylneuraminic acid aldolase; AltName: Full=Sialate ly | --- | --- | --- | --- |
| gi 335292737 ref XP_001927469.2 | PREDICTED: serine/arginine-rich splicing factor 5 isoform 2 [Sus scrofa] >gi 335292735 ref XP_001927454.2  PREDICTED: serine/arginine-rich splicing factor 5 isoform 1 [Sus scrofa]                                                                       | --- | --- | --- | --- |
| gi 335307313 ref XP_003360793.1 | PREDICTED: serine/arginine-rich splicing factor 5-like [Sus scrofa]                                                                                                                                                                                       |     |     |     |     |
| gi 346421328 ref NP_001231038.1 | synapse-associated protein 1 isoform 2 [Sus scrofa]                                                                                                                                                                                                       | --- | --- | --- | --- |
| gi 346421345 ref NP_001231036.1 | synapse-associated protein 1 isoform 1 [Sus scrofa]                                                                                                                                                                                                       |     |     |     |     |
| gi 350580558 ref XP_003354114.2 | PREDICTED: dynamin-2-like [Sus scrofa]                                                                                                                                                                                                                    | --- | --- | --- | --- |
| gi 178057329 ref NP_001116638.1 | protein phosphatase 1 regulatory subunit 11 [Sus scrofa] >gi 194039988 ref XP_001929404.1  PREDICTED: protein phosphatase 1 regulatory subunit 11-like [Sus scrofa] >gi 211926939 dbj BAG82680.1  protein phosphatase 1, regulatory subunit 11 [Sus scrof | --- | --- | --- | --- |
| gi 350584858 ref XP_003126900.3 | PREDICTED: craniofacial development protein 1, partial [Sus scrofa]                                                                                                                                                                                       | --- | --- | --- | --- |
| gi 347800629 ref NP_001231      | synaptosomal-associated protein,                                                                                                                                                                                                                          | --- | --- | --- | --- |

|                                 |                                                                                                                                                                                                                                                           |       |       |       |       |
|---------------------------------|-----------------------------------------------------------------------------------------------------------------------------------------------------------------------------------------------------------------------------------------------------------|-------|-------|-------|-------|
| 648.1                           | 23kDa [Sus scrofa]                                                                                                                                                                                                                                        |       |       |       |       |
| gi 298104112 ref NP_001177119.1 | charged multivesicular body protein 4c [Sus scrofa]                                                                                                                                                                                                       | ---   | ---   | ---   | ---   |
| gi 311264732 ref XP_003130306.1 | PREDICTED: synaptophysin-like protein 1-like [Sus scrofa]                                                                                                                                                                                                 | ---   | ---   | ---   | ---   |
| gi 148230691 ref NP_001090958.1 | Krueppel-like factor 5 [Sus scrofa] >gi 110007347 gb ABG49105.1  kruppel-like factor 5 [Sus scrofa]                                                                                                                                                       | ---   | ---   | ---   | ---   |
| gi 335282891 ref XP_003123558.2 | PREDICTED: myosin-IXb-like [Sus scrofa]                                                                                                                                                                                                                   | ---   | ---   | ---   | ---   |
| gi 194044882 ref XP_001926942.1 | PREDICTED: 26S proteasome non-ATPase regulatory subunit 10 isoform 1 [Sus scrofa] >gi 335309762 ref XP_003361757.1  PREDICTED: 26S proteasome non-ATPase regulatory subunit 10-like isoform 1 [Sus scrofa]                                                | ---   | ---   | ---   | ---   |
| gi 343887438 ref NP_001230620.1 | plasma glutamate carboxypeptidase precursor [Sus scrofa]                                                                                                                                                                                                  | 0.432 | 0.694 | 0.732 | 0.475 |
| gi 350579791 ref XP_003480684.1 | PREDICTED: endothelial differentiation-related factor 1-like isoform 2 [Sus scrofa] >gi 350579789 ref XP_003480683.1  PREDICTED: endothelial differentiation-related factor 1-like isoform 1 [Sus scrofa] >gi 149132072 gb ABR20898.1  multiprotein bridg | ---   | ---   | ---   | ---   |
| gi 350586171 ref XP_003356500.2 | PREDICTED: ubiquitin carboxyl-terminal hydrolase 24 [Sus scrofa]                                                                                                                                                                                          | ---   | ---   | ---   | ---   |
| gi 232142 sp P29797.1 GNAS_PIG  | RecName: Full=Guanine nucleotide-binding protein G(s) subunit alpha; AltName: Full=Adenylate cyclase-stimulating G alpha protein >gi 1958 emb CAA45355.1  alpha-stimulatory subunit of GTP-binding protein [Sus scrofa]                                   | ---   | ---   | ---   | ---   |
| gi 147223308 emb CAN13201.1     | GNAS complex locus [Sus scrofa] >gi 147223420 emb CAN13152.1  GNAS complex locus [Sus scrofa]                                                                                                                                                             |       |       |       |       |

|                                 |                                                                                                                                                                                                          |     |     |     |     |
|---------------------------------|----------------------------------------------------------------------------------------------------------------------------------------------------------------------------------------------------------|-----|-----|-----|-----|
| gi 147223417 emb CAN13149.1     | GNAS complex locus [Sus scrofa] >gi 147223306 emb CAN13199.1  GNAS complex locus [Sus scrofa]                                                                                                            |     |     |     |     |
| gi 285002235 ref NP_999477.2    | guanine nucleotide-binding protein G(s) subunit alpha GNASL [Sus scrofa] >gi 147223423 emb CAN13155.1  GNAS complex locus [Sus scrofa] >gi 147223313 emb CAN13206.1  GNAS complex locus [Sus scrofa]     |     |     |     |     |
| gi 285002237 ref NP_001165454.1 | guanine nucleotide-binding protein G(s) subunit alpha GNASS [Sus scrofa]                                                                                                                                 |     |     |     |     |
| gi 285002241 ref NP_001165456.1 | guanine nucleotide-binding protein G(s) subunit alpha isoform g [Sus scrofa] >gi 147223316 emb CAN13209.1  GNAS complex locus [Sus scrofa] >gi 147223424 emb CAN13156.1  GNAS complex locus [Sus scrofa] |     |     |     |     |
| gi 138752630 emb CAM32247.1     | guanine nucleotide-binding protein, alpha-stimulating activity polypeptide 1 [Sus scrofa]                                                                                                                |     |     |     |     |
| gi 147223418 emb CAN13150.1     | GNAS complex locus [Sus scrofa] >gi 147223307 emb CAN13200.1  GNAS complex locus [Sus scrofa]                                                                                                            |     |     |     |     |
| gi 285002239 ref NP_001165455.1 | guanine nucleotide-binding protein G(s) subunit alpha isoform f [Sus scrofa] >gi 147223425 emb CAN13157.1  GNAS complex locus [Sus scrofa] >gi 147223315 emb CAN13208.1  GNAS complex locus [Sus scrofa] |     |     |     |     |
| gi 350585712 ref XP_003482033.1 | PREDICTED: eukaryotic translation initiation factor 4 gamma 3-like [Sus scrofa]                                                                                                                          | --- | --- | --- | --- |
| gi 350579849 ref XP_003480696.1 | PREDICTED: src substrate cortactin-like [Sus scrofa]                                                                                                                                                     | --- | --- | --- | --- |
| gi 343790902 ref NP_001230508.1 | thymidylate synthetase [Sus scrofa]                                                                                                                                                                      | --- | --- | --- | --- |
| gi 350596976 ref XP_003361      | PREDICTED: methionyl-tRNA                                                                                                                                                                                | --- | --- | --- | --- |

|                                 |                                                                                                                                                                                                                                               |     |     |     |     |
|---------------------------------|-----------------------------------------------------------------------------------------------------------------------------------------------------------------------------------------------------------------------------------------------|-----|-----|-----|-----|
| 857.2]                          | synthetase, cytoplasmic-like [Sus scrofa]                                                                                                                                                                                                     |     |     |     |     |
| gi 343488509 ref NP_001230414.1 | valacyclovir hydrolase precursor [Sus scrofa]                                                                                                                                                                                                 | --- | --- | --- | --- |
| gi 227430403 ref NP_001153085.1 | NAD(P)H dehydrogenase [quinone] 1 [Sus scrofa]                                                                                                                                                                                                | --- | --- | --- | --- |
| gi 350586151 ref XP_003128006.3 | PREDICTED: LOW QUALITY PROTEIN: inaD-like protein [Sus scrofa]                                                                                                                                                                                | --- | --- | --- | --- |
| gi 335284763 ref XP_003124756.2 | PREDICTED: E3 ubiquitin-protein ligase CHIP-like [Sus scrofa]                                                                                                                                                                                 | --- | --- | --- | --- |
| gi 335297742 ref XP_003131565.2 | PREDICTED: protein C17orf37 homolog [Sus scrofa]                                                                                                                                                                                              | --- | --- | --- | --- |
| gi 335300657 ref XP_003358980.1 | PREDICTED: protein SON isoform 1 [Sus scrofa]                                                                                                                                                                                                 | --- | --- | --- | --- |
| gi 335300659 ref XP_003358981.1 | PREDICTED: protein SON isoform 2 [Sus scrofa]                                                                                                                                                                                                 |     |     |     |     |
| gi 311264544 ref XP_003130216.1 | PREDICTED: replication protein A 14 kDa subunit-like [Sus scrofa]                                                                                                                                                                             | --- | --- | --- | --- |
| gi 335307995 ref XP_003361061.1 | PREDICTED: replication protein A 14 kDa subunit-like [Sus scrofa]                                                                                                                                                                             |     |     |     |     |
| gi 55926205 ref NP_001007520.1  | interferon-related developmental regulator 1 [Sus scrofa] >gi 68565361 sp Q5S1U6.1 IFRD1_PIG RecName: Full=Interferon-related developmental regulator 1 >gi 55709896 gb AAV58829.1  interferon-related developmental regulator 1 [Sus scrofa] | --- | --- | --- | --- |
| gi 350590514 ref XP_003131675.3 | PREDICTED: retinoid-inducible serine carboxypeptidase [Sus scrofa]                                                                                                                                                                            | --- | --- | --- | --- |
| gi 335290950 ref XP_003356343.1 | PREDICTED: tyrosyl-tRNA synthetase, cytoplasmic [Sus scrofa]                                                                                                                                                                                  | --- | --- | --- | --- |
| gi 350592546 ref XP_001925361.4 | PREDICTED: TP53-regulated inhibitor of apoptosis 1-like, partial [Sus scrofa]                                                                                                                                                                 | --- | --- | --- | --- |
| gi 350584124 ref XP_003481674.1 | PREDICTED: melanocyte protein PMEL, partial [Sus scrofa]                                                                                                                                                                                      | --- | --- | --- | --- |
| gi 350584130 ref XP_003126312.3 | PREDICTED: proliferation-associated protein 2G4 [Sus scrofa]                                                                                                                                                                                  |     |     |     |     |

|                                      |                                                                               |     |     |     |     |
|--------------------------------------|-------------------------------------------------------------------------------|-----|-----|-----|-----|
| gi 311276400 ref XP_003135190.1      | PREDICTED: LOW QUALITY PROTEIN: hephaestin-like [Sus scrofa]                  | --- | --- | --- | --- |
| gi 350588022 ref XP_003482536.1      | PREDICTED: protein transport protein Sec31A-like [Sus scrofa]                 | --- | --- | --- | --- |
| gi 347300255 ref NP_001231435.1      | DAZ-associated protein 1 [Sus scrofa]                                         | --- | --- | --- | --- |
| gi 311270533 ref XP_003132904.1      | PREDICTED: splicing factor, suppressor of white-apricot homolog [Sus scrofa]  | --- | --- | --- | --- |
| gi 335297337 ref XP_003131233.2      | PREDICTED: signal recognition particle 68 kDa protein-like [Sus scrofa]       | --- | --- | --- | --- |
| gi 350584672 ref XP_003126766.2      | PREDICTED: transmembrane and coiled-coil domains protein 3 [Sus scrofa]       | --- | --- | --- | --- |
| gi 350585412 ref XP_003356115.2      | PREDICTED: receptor-type tyrosine-protein phosphatase H, partial [Sus scrofa] | --- | --- | --- | --- |
| gi 311248328 ref XP_003123084.1      | PREDICTED: nicalin [Sus scrofa]                                               | --- | --- | --- | --- |
| gi 194038528 ref XP_001929053.1      | PREDICTED: acyl-coenzyme A thioesterase 6-like [Sus scrofa]                   | --- | --- | --- | --- |
| gi 194042067 ref XP_001929334.1      | PREDICTED: actin-binding LIM protein 1 isoform 1 [Sus scrofa]                 | --- | --- | --- | --- |
| gi 311271869 ref XP_003133239.1      | PREDICTED: actin-binding LIM protein 1 isoform 3 [Sus scrofa]                 |     |     |     |     |
| gi 311271871 ref XP_003133238.1      | PREDICTED: actin-binding LIM protein 1 isoform 2 [Sus scrofa]                 |     |     |     |     |
| gi 311249377 ref XP_003123620.1      | PREDICTED: transcriptional repressor p66-alpha [Sus scrofa]                   | --- | --- | --- | --- |
| gi 194043684 ref XP_001926541.1      | PREDICTED: inward rectifier potassium channel 13 isoform 1 [Sus scrofa]       | --- | --- | --- | --- |
| gi 16033755 gb AAL13316.1 AF424780_1 | cytochrome P450 3A [Sus scrofa]                                               | --- | --- | --- | --- |
| gi 19071856 dbj BAB85672.1           | cytochrome P450 3A46v1 [Sus scrofa]                                           |     |     |     |     |
| gi 19071846 dbj BAB85667.1           | cytochrome P450 3A29v3 [Sus scrofa]                                           |     |     |     |     |
| gi 196475656 gb ACG76385.1           | cytochrome P450 CYP3A [Sus scrofa]                                            |     |     |     |     |



|                                 |                                                                                                                                                                                          |       |       |       |       |
|---------------------------------|------------------------------------------------------------------------------------------------------------------------------------------------------------------------------------------|-------|-------|-------|-------|
| gi 47523900 ref NP_999588.1     | cytochrome P450 3A29 [Sus scrofa] >gi 5921921 sp P79401.1 CP3 AT_PIG RecName: Full=Cytochrome P450 3A29; AltName: Full=CYP11A29 >gi 1903317 emb CAB07513.1  cytochrome P450 [Sus scrofa] |       |       |       |       |
| gi 19071852 dbj BAB85670.1      | cytochrome P450 3A39v3 [Sus scrofa]                                                                                                                                                      |       |       |       |       |
| gi 19071844 dbj BAB85666.1      | cytochrome P450 3A29v2 [Sus scrofa]                                                                                                                                                      |       |       |       |       |
| gi 19071854 dbj BAB85671.1      | cytochrome P450 3A39v4 [Sus scrofa]                                                                                                                                                      |       |       |       |       |
| gi 198282077 ref NP_001128296.1 | cytochrome P450 3A46 [Sus scrofa] >gi 197791176 gb ABS58488.2  cytochrome P450 [Sus scrofa]                                                                                              |       |       |       |       |
| gi 47523898 ref NP_999587.1     | cytochrome P450 3A39 [Sus scrofa] >gi 4151927 gb AAD04628.1  cytochrome P450 [Sus scrofa]                                                                                                |       |       |       |       |
| gi 19071848 dbj BAB85668.1      | cytochrome P450 3A29v4 [Sus scrofa]                                                                                                                                                      |       |       |       |       |
| gi 154101336 gb ABS58494.1      | cytochrome P450 [Sus scrofa]                                                                                                                                                             |       |       |       |       |
| gi 19071858 dbj BAB85673.1      | cytochrome P450 3A46v2 [Sus scrofa]                                                                                                                                                      |       |       |       |       |
| gi 343488540 ref NP_001230425.1 | GSK3-beta interaction protein [Sus scrofa]                                                                                                                                               | 1.315 | 1.569 | 1.714 | 0.976 |
| gi 335308872 ref XP_003361404.1 | PREDICTED: serine hydroxymethyltransferase, cytosolic [Sus scrofa]                                                                                                                       | ---   | ---   | ---   | ---   |
| gi 335309568 ref XP_003130716.2 | PREDICTED: ubiquitin-associated protein 2-like, partial [Sus scrofa]                                                                                                                     | ---   | ---   | ---   | ---   |
| gi 350589476 ref XP_003482855.1 | PREDICTED: ubiquitin-associated protein 2-like [Sus scrofa]                                                                                                                              |       |       |       |       |
| gi 346986410 ref NP_001231355.1 | glycine cleavage system T-protein [Sus scrofa]                                                                                                                                           | ---   | ---   | ---   | ---   |
| gi 350587512 ref XP_003129026.3 | PREDICTED: pre-mRNA 3'-end-processing factor FIP1-like [Sus scrofa]                                                                                                                      | ---   | ---   | ---   | ---   |
| gi 313570009 ref NP_001186292.1 | calcium-binding mitochondrial carrier protein SCaMC-1-like [Sus scrofa] >gi 186886352 gb ACC93575.                                                                                       | ---   | ---   | ---   | ---   |

|                                 |                                                                                                                                              |       |       |      |       |
|---------------------------------|----------------------------------------------------------------------------------------------------------------------------------------------|-------|-------|------|-------|
|                                 | 1  small calcium-binding mitochondrial carrier 1 [Sus scrofa]                                                                                |       |       |      |       |
| gi 350591284 ref XP_003132316.2 | PREDICTED: sarcolemmal membrane-associated protein [Sus scrofa]                                                                              | ---   | ---   | ---  | ---   |
| gi 350580065 ref XP_003122766.3 | PREDICTED: syntaxin-3-like, partial [Sus scrofa]                                                                                             | 0.474 | 0.757 | 0.71 | 0.552 |
| gi 335296874 ref XP_003131019.2 | PREDICTED: calcium-binding protein 39-like [Sus scrofa]                                                                                      | ---   | ---   | ---  | ---   |
| gi 335310350 ref XP_003361992.1 | PREDICTED: carbonyl reductase [NADPH] 1-like, partial [Sus scrofa]                                                                           | ---   | ---   | ---  | ---   |
| gi 350580387 ref XP_003480810.1 | PREDICTED: calcium homeostasis endoplasmic reticulum protein-like [Sus scrofa]                                                               | ---   | ---   | ---  | ---   |
| gi 335296376 ref XP_003357763.1 | PREDICTED: probable gluconokinase-like [Sus scrofa]                                                                                          | ---   | ---   | ---  | ---   |
| gi 335297595 ref XP_003358072.1 | PREDICTED: interferon-induced 35 kDa protein-like [Sus scrofa]                                                                               | ---   | ---   | ---  | ---   |
| gi 350595403 ref XP_003134876.3 | PREDICTED: hypothetical protein LOC100516841 [Sus scrofa]                                                                                    | ---   | ---   | ---  | ---   |
| gi 350594194 ref XP_003359791.2 | PREDICTED: hypothetical protein LOC100620294 [Sus scrofa]                                                                                    | ---   | ---   | ---  | ---   |
| gi 350582696 ref XP_003354965.2 | PREDICTED: ATP-dependent RNA helicase DDX1 [Sus scrofa]                                                                                      | ---   | ---   | ---  | ---   |
| gi 297747306 ref NP_001177083.1 | zinc finger, CCHC domain containing 8 [Sus scrofa]                                                                                           | ---   | ---   | ---  | ---   |
| gi 350596491 ref XP_003484281.1 | PREDICTED: zinc finger CCHC domain-containing protein 8-like, partial [Sus scrofa]                                                           |       |       |      |       |
| gi 298104144 ref NP_001177137.1 | S100 calcium binding protein A16 [Sus scrofa] >gi 298104142 ref NP_001177136.1  S100 calcium binding protein A16 [Sus scrofa]                | ---   | ---   | ---  | ---   |
| gi 350583616 ref XP_003481553.1 | PREDICTED: lipoamide acyltransferase component of branched-chain alpha-keto acid dehydrogenase complex, mitochondrial isoform 2 [Sus scrofa] | ---   | ---   | ---  | ---   |
| gi 350583618 ref XP_001924875.4 | PREDICTED: lipoamide acyltransferase component of branched-chain alpha-keto acid                                                             |       |       |      |       |

|                                 |                                                                                                                                                                                                                               |     |     |     |     |
|---------------------------------|-------------------------------------------------------------------------------------------------------------------------------------------------------------------------------------------------------------------------------|-----|-----|-----|-----|
|                                 | dehydrogenase complex, mitochondrial isoform 1 [Sus scrofa]                                                                                                                                                                   |     |     |     |     |
| gi 343488551 ref NP_001230428.1 | mitochondrial intermembrane space import and assembly protein 40 [Sus scrofa]                                                                                                                                                 | --- | --- | --- | --- |
| gi 311272864 ref XP_003133619.1 | PREDICTED: uncharacterized protein C2orf47 homolog, mitochondrial-like [Sus scrofa]                                                                                                                                           | --- | --- | --- | --- |
| gi 350596869 ref XP_003361751.2 | PREDICTED: uncharacterized protein C2orf47 homolog, mitochondrial-like [Sus scrofa]                                                                                                                                           |     |     |     |     |
| gi 194043356 ref XP_001929473.1 | PREDICTED: SWI/SNF-related matrix-associated actin-dependent regulator of chromatin subfamily B member 1 isoform 2 [Sus scrofa]                                                                                               | --- | --- | --- | --- |
| gi 194043360 ref XP_001929472.1 | PREDICTED: SWI/SNF-related matrix-associated actin-dependent regulator of chromatin subfamily B member 1 isoform 1 [Sus scrofa]                                                                                               |     |     |     |     |
| gi 350583576 ref XP_003125920.3 | PREDICTED: sortilin [Sus scrofa]                                                                                                                                                                                              | --- | --- | --- | --- |
| gi 373248672 emb CCF70742.1     | sortilin 1, partial [Sus scrofa] >gi 373248668 emb CCF70740.1  sortilin 1, partial [Sus scrofa] >gi 373248674 emb CCF70743.1  sortilin 1, partial [Sus scrofa] >gi 373248670 emb CCF70741.1  sortilin 1, partial [Sus scrofa] |     |     |     |     |
| gi 350588230 ref XP_003129648.3 | PREDICTED: nuclear pore complex protein Nup98-Nup96-like [Sus scrofa]                                                                                                                                                         | --- | --- | --- | --- |
| gi 121195 sp P01281.1 GIP_PIG   | RecName: Full=Gastric inhibitory polypeptide; Short=GIP; AltName: Full=Glucose-dependent insulinotropic polypeptide                                                                                                           | --- | --- | --- | --- |
| gi 388255283 gb AFK25156.1      | gastric inhibitory polypeptide precursor [Sus scrofa]                                                                                                                                                                         |     |     |     |     |
| gi 415514 gb AAB28179.1         | diazepam-binding inhibitor (32-86), DBI(32-86)=antibacterial peptide [swine, small intestine, Peptide Partial, 36 aa]                                                                                                         |     |     |     |     |
| gi 335297830 ref XP_003358130.1 | PREDICTED: gastric inhibitory polypeptide-like [Sus scrofa]                                                                                                                                                                   |     |     |     |     |

|                                 |                                                                                                                                                                                                                                                          |     |     |     |     |
|---------------------------------|----------------------------------------------------------------------------------------------------------------------------------------------------------------------------------------------------------------------------------------------------------|-----|-----|-----|-----|
| gi 350592229 ref XP_003359063.2 | PREDICTED: lanosterol synthase-like [Sus scrofa]                                                                                                                                                                                                         | --- | --- | --- | --- |
| gi 311246600 ref XP_001926112.2 | PREDICTED: serine/threonine-protein phosphatase 2A activator-like isoform 1 [Sus scrofa]                                                                                                                                                                 | --- | --- | --- | --- |
| gi 335281070 ref XP_003353729.1 | PREDICTED: serine/threonine-protein phosphatase 2A activator-like isoform 2 [Sus scrofa]                                                                                                                                                                 |     |     |     |     |
| gi 147900197 ref NP_001090953.1 | cytochrome c oxidase subunit 7A2, mitochondrial [Sus scrofa] >gi 117661207 gb ABK55662.1  COX7A2 [Sus scrofa]                                                                                                                                            | --- | --- | --- | --- |
| gi 311270525 ref XP_003132902.1 | PREDICTED: tRNA pseudouridine synthase A, mitochondrial [Sus scrofa] >gi 194043580 ref XP_001928625.1  PREDICTED: tRNA pseudouridine synthase A, mitochondrial isoform 2 [Sus scrofa]                                                                    | --- | --- | --- | --- |
| gi 311245687 ref XP_003121922.1 | PREDICTED: uncharacterized protein C9orf82 homolog [Sus scrofa]                                                                                                                                                                                          | --- | --- | --- | --- |
| gi 350587407 ref XP_003482407.1 | PREDICTED: hypothetical protein LOC100737378 [Sus scrofa]                                                                                                                                                                                                | --- | --- | --- | --- |
| gi 335307979 ref XP_003361054.1 | PREDICTED: abhydrolase domain-containing protein 10, mitochondrial-like [Sus scrofa]                                                                                                                                                                     | --- | --- | --- | --- |
| gi 189232885 emb CAQ34905.1     | signal recognition particle receptor B subunit [Sus scrofa]                                                                                                                                                                                              | --- | --- | --- | --- |
| gi 311269414 ref XP_003132477.1 | PREDICTED: signal recognition particle receptor subunit beta-like [Sus scrofa]                                                                                                                                                                           |     |     |     |     |
| gi 350594246 ref XP_003133954.3 | PREDICTED: disabled homolog 2 [Sus scrofa]                                                                                                                                                                                                               | --- | --- | --- | --- |
| gi 147903209 ref NP_001090934.1 | small nuclear ribonucleoprotein E [Sus scrofa] >gi 166233313 sp A1XQR9.1 RUXE_PIG RecName: Full=Small nuclear ribonucleoprotein E; Short=snRNP-E; AltName: Full=Sm protein E; Short=Sm-E; Short=SmE >gi 117660560 gb ABK55626.1  NDUFB2 [Sus scrofa] >gi | --- | --- | --- | --- |

|                                 |                                                                                                                                                                                                 |     |     |     |     |
|---------------------------------|-------------------------------------------------------------------------------------------------------------------------------------------------------------------------------------------------|-----|-----|-----|-----|
| gi 350594505 ref XP_003359894.2 | PREDICTED: annexin A6-like [Sus scrofa]                                                                                                                                                         | --- | --- | --- | --- |
| gi 348041218 ref NP_001231706.1 | Ena-vasodilator stimulated phosphoprotein [Sus scrofa]                                                                                                                                          | --- | --- | --- | --- |
| gi 350587198 ref XP_003482364.1 | PREDICTED: ena/VASP-like protein-like [Sus scrofa]                                                                                                                                              |     |     |     |     |
| gi 156779005 gb ABU95648.1      | sirtuin 2 [Sus scrofa]                                                                                                                                                                          | --- | --- | --- | --- |
| gi 166796035 ref NP_001107743.1 | NAD-dependent deacetylase sirtuin-2 [Sus scrofa] >gi 164653929 gb ABY65333.1  sirtuin 2 [Sus scrofa]                                                                                            |     |     |     |     |
| gi 227057425 gb ACP18879.1      | truncated sirtuin 2 [Sus scrofa]                                                                                                                                                                |     |     |     |     |
| gi 227057441 gb ACP18880.1      | sirtuin 2 [Sus scrofa]                                                                                                                                                                          |     |     |     |     |
| gi 311258366 ref XP_003127578.1 | PREDICTED: espin [Sus scrofa]                                                                                                                                                                   | --- | --- | --- | --- |
| gi 350585555 ref XP_003481987.1 | PREDICTED: espin-like [Sus scrofa]                                                                                                                                                              |     |     |     |     |
| gi 350578468 ref XP_003121482.3 | PREDICTED: myosin-Vb [Sus scrofa]                                                                                                                                                               | --- | --- | --- | --- |
| gi 350581059 ref XP_003123938.3 | PREDICTED: phosphorylated adapter RNA export protein-like [Sus scrofa]                                                                                                                          | --- | --- | --- | --- |
| gi 350584132 ref XP_003481675.1 | PREDICTED: proliferation-associated protein 2G4-like [Sus scrofa]                                                                                                                               | --- | --- | --- | --- |
| gi 347800675 ref NP_001231654.1 | molybdenum cofactor synthesis 2 [Sus scrofa]                                                                                                                                                    | --- | --- | --- | --- |
| gi 63139103 gb AAV33861.1       | centrin 2 [Sus scrofa]                                                                                                                                                                          | --- | --- | --- | --- |
| gi 194044860 ref XP_001927244.1 | PREDICTED: centrin-2 [Sus scrofa]                                                                                                                                                               |     |     |     |     |
| gi 33320702 gb AAQ05997.1       | ATPase subunit 8 [Sus scrofa]                                                                                                                                                                   | --- | --- | --- | --- |
| gi 90969048 gb ABE02601.1       | ATP synthase F0 subunit 8 [Sus scrofa]                                                                                                                                                          |     |     |     |     |
| gi 94981325 gb ABF49553.1       | ATPase subunit 8 [Sus scrofa] >gi 145315685 gb ABP63227.1  ATP synthase F0 subunit 8 [Sus scrofa] >gi 145315447 gb ABP63006.1  ATP synthase F0 subunit 8 [Sus scrofa] >gi 124249812 gb ABM92885 |     |     |     |     |

|                                     |                                                                                                                                                                                                                                                           |       |      |       |       |
|-------------------------------------|-----------------------------------------------------------------------------------------------------------------------------------------------------------------------------------------------------------------------------------------------------------|-------|------|-------|-------|
|                                     | .1  ATPase subunit 8 [Sus scrofa]                                                                                                                                                                                                                         |       |      |       |       |
| gi 124358981 ref YP_001023767.1     | ATP synthase F0 subunit 8 [Phacochoerus africanus] >gi 88766365 gb ABD49697.1  ATP synthase F0 subunit 8 [Phacochoerus africanus]                                                                                                                         |       |      |       |       |
| gi 33320870 gb AAQ06153.1           | ATPase subunit 8 [Sus scrofa]                                                                                                                                                                                                                             |       |      |       |       |
| gi 312233368 ref YP_004021579.1     | ATP synthase F0 subunit 8 [Sus scrofa taiwanensis] >gi 347448742 gb AEO93054.1  ATP synthase F0 subunit 8 (mitochondrion) [Sus scrofa] >gi 347448686 gb AEO93002.1  ATP synthase F0 subunit 8 (mitochondrion) [Sus scrofa] >gi 347448728 gb AEO93041.1  A |       |      |       |       |
| gi 347802434 gb AEP22018.1          | ATP synthase F0 subunit 8 (mitochondrion) [Potamochoerus porcus]                                                                                                                                                                                          |       |      |       |       |
| gi 45826174 gb AAS77695.1           | ATP synthase F0 subunit 8 [Sus scrofa]                                                                                                                                                                                                                    |       |      |       |       |
| gi 335282277 ref XP_003354019.1     | PREDICTED: NADH dehydrogenase [ubiquinone] iron-sulfur protein 7, mitochondrial-like isoform 1 [Sus scrofa]                                                                                                                                               | ---   | ---  | ---   | ---   |
| gi 335282279 ref XP_003354020.1     | PREDICTED: NADH dehydrogenase [ubiquinone] iron-sulfur protein 7, mitochondrial-like isoform 2 [Sus scrofa]                                                                                                                                               |       |      |       |       |
| gi 157427724 ref NP_001098770.1     | COP9 signalosome complex subunit 5 [Sus scrofa] >gi 148800597 gb ABR13016.1  COP9 constitutive photomorphogenic-like subunit 5 [Sus scrofa]                                                                                                               | ---   | ---  | ---   | ---   |
| gi 226709210 sp A1XQT2.1  COX6C_PIG | RecName: Full=Cytochrome c oxidase subunit 6C; AltName: Full=Cytochrome c oxidase polypeptide VIc >gi 148225574 ref NP_001090942.1  cytochrome c oxidase subunit 6C [Sus                                                                                  | 0.532 | 0.35 | 0.448 | 0.376 |

|                                      |                                                                                                                                                                                                                                                          |     |     |     |     |
|--------------------------------------|----------------------------------------------------------------------------------------------------------------------------------------------------------------------------------------------------------------------------------------------------------|-----|-----|-----|-----|
|                                      | scrofa] >gi 117660798 gb ABK55638.1  COX6C [Sus scrofa]                                                                                                                                                                                                  |     |     |     |     |
| gi 335297915 ref XP_003358154.1      | PREDICTED: ankyrin repeat domain-containing protein 40-like [Sus scrofa]                                                                                                                                                                                 | --- | --- | --- | --- |
| gi 194043190 ref XP_001928943.1      | PREDICTED: protein NipSnap homolog 1 isoform 1 [Sus scrofa]                                                                                                                                                                                              | --- | --- | --- | --- |
| gi 335301406 ref XP_003359199.1      | PREDICTED: protein NipSnap homolog 1 isoform 2 [Sus scrofa]                                                                                                                                                                                              |     |     |     |     |
| gi 56404321 sp Q71LE2.3 H33_PIG      | RecName: Full=Histone H3.3 >gi 47522626 ref NP_999095.1  histone H3.3 [Sus scrofa] >gi 311266778 ref XP_003131242.1  PREDICTED: histone H3.3-like [Sus scrofa] >gi 18643343 gb AAL76273.1 AF469469_1 histone H3.3A [Sus scrofa]                          | --- | --- | --- | --- |
| gi 335291702 ref XP_003356567.1      | PREDICTED: hypothetical protein LOC100627410 [Sus scrofa]                                                                                                                                                                                                |     |     |     |     |
| gi 311259879 ref XP_003128260.1      | PREDICTED: histone H3.1-like [Sus scrofa] >gi 194039818 ref XP_001927801.1  PREDICTED: histone H3.1-like [Sus scrofa] >gi 336092201 gb AEI00724.1  histone cluster 1 [Sus scrofa]                                                                        |     |     |     |     |
| gi 194039886 ref XP_001928622.1      | PREDICTED: histone H3.1-like [Sus scrofa]                                                                                                                                                                                                                |     |     |     |     |
| gi 350583434 ref XP_003481517.1      | PREDICTED: histone H3.2 [Sus scrofa] >gi 350583419 ref XP_003481513.1  PREDICTED: histone H3.2-like [Sus scrofa] >gi 335287027 ref XP_003355255.1  PREDICTED: histone H3.2-like [Sus scrofa] >gi 347582608 ref NP_001231571.1  histone H3.2 [Sus scrofa] |     |     |     |     |
| gi 19919838 gb AAM08402.1 AF490841_1 | glutaminase [Sus scrofa]                                                                                                                                                                                                                                 | --- | --- | --- | --- |
| gi 350593725 ref XP_003133597.3      | PREDICTED: glutaminase kidney isoform, mitochondrial [Sus scrofa]                                                                                                                                                                                        |     |     |     |     |
| gi 335289253 ref XP_003126970.2      | PREDICTED: nuclear transport factor 2-like [Sus scrofa]                                                                                                                                                                                                  | --- | --- | --- | --- |

|                                 |                                                                                                                                                                                                        |     |     |     |     |
|---------------------------------|--------------------------------------------------------------------------------------------------------------------------------------------------------------------------------------------------------|-----|-----|-----|-----|
| gi 335310392 ref XP_003362011.1 | PREDICTED: nuclear transport factor 2-like [Sus scrofa]                                                                                                                                                |     |     |     |     |
| gi 311276597 ref XP_003135272.1 | PREDICTED: hypothetical protein LOC100511612 [Sus scrofa]                                                                                                                                              | --- | --- | --- | --- |
| gi 335301488 ref XP_003359221.1 | PREDICTED: phosphatidylinositol 4-kinase alpha-like [Sus scrofa]                                                                                                                                       | --- | --- | --- | --- |
| gi 335292819 ref XP_003356805.1 | PREDICTED: activator of 90 kDa heat shock protein ATPase homolog 1-like [Sus scrofa] >gi 194038625 ref XP_001928925.1  PREDICTED: activator of 90 kDa heat shock protein ATPase homolog 1 [Sus scrofa] | --- | --- | --- | --- |
| gi 298104110 ref NP_001177118.1 | tricarboxylate transport protein, mitochondrial [Sus scrofa]                                                                                                                                           | --- | --- | --- | --- |
| gi 343790961 ref NP_001230534.1 | calcium uptake protein 1, mitochondrial [Sus scrofa]                                                                                                                                                   | --- | --- | --- | --- |
| gi 350593895 ref XP_003483787.1 | PREDICTED: E3 ubiquitin-protein ligase RNF25 [Sus scrofa]                                                                                                                                              | --- | --- | --- | --- |
| gi 350596061 ref XP_003484224.1 | PREDICTED: E3 ubiquitin-protein ligase RNF25-like [Sus scrofa]                                                                                                                                         |     |     |     |     |
| gi 106073338 gb ABF81978.1      | muscle glycogen phosphorylase [Sus scrofa]                                                                                                                                                             | --- | --- | --- | --- |
| gi 335281566 ref XP_003122636.2 | PREDICTED: glycogen phosphorylase, muscle form isoform 1 [Sus scrofa]                                                                                                                                  |     |     |     |     |
| gi 335281570 ref XP_003353833.1 | PREDICTED: glycogen phosphorylase, muscle form isoform 3 [Sus scrofa]                                                                                                                                  |     |     |     |     |
| gi 335281568 ref XP_003353832.1 | PREDICTED: glycogen phosphorylase, muscle form isoform 2 [Sus scrofa]                                                                                                                                  |     |     |     |     |
| gi 300119711 gb ABF81977.2      | muscle glycogen phosphorylase [Sus scrofa]                                                                                                                                                             |     |     |     |     |
| gi 311254844 ref XP_001929459.2 | PREDICTED: serine/threonine-protein kinase N2 isoform 1 [Sus scrofa]                                                                                                                                   | --- | --- | --- | --- |
| gi 335305150 ref XP_003134640.2 | PREDICTED: zyxin [Sus scrofa]                                                                                                                                                                          | --- | --- | --- | --- |
| gi 350591506 ref XP_003132459.3 | PREDICTED: ruvB-like 1-like, partial [Sus scrofa]                                                                                                                                                      | --- | --- | --- | --- |
| gi 311274870 ref XP_003134      | PREDICTED:                                                                                                                                                                                             | --- | --- | --- | --- |



|                                  |                                                                                                                                                                                                                                                                                                     |     |     |     |     |
|----------------------------------|-----------------------------------------------------------------------------------------------------------------------------------------------------------------------------------------------------------------------------------------------------------------------------------------------------|-----|-----|-----|-----|
| 490.1                            | 1-phosphatidylinositol-4,5-bisphosphate phosphodiesterase gamma-1-like [Sus scrofa]                                                                                                                                                                                                                 |     |     |     |     |
| gi 311243834 ref XP_003121200.1  | PREDICTED: splicing factor 3B subunit 5-like [Sus scrofa]                                                                                                                                                                                                                                           | --- | --- | --- | --- |
| gi 350578376 ref XP_001924454.2  | PREDICTED: phosphoacetylglucosamine mutase [Sus scrofa]                                                                                                                                                                                                                                             | --- | --- | --- | --- |
| gi 298104097 ref NP_001177113.1  | dnaJ homolog subfamily C member 3 precursor [Sus scrofa]                                                                                                                                                                                                                                            | --- | --- | --- | --- |
| gi 308208140 gb ADO20319.1       | P58IPK [Sus scrofa]                                                                                                                                                                                                                                                                                 |     |     |     |     |
| gi 67468552 gb AA67906.1         | centrin 3 [Sus scrofa]                                                                                                                                                                                                                                                                              | --- | --- | --- | --- |
| gi 311249828 ref XP_003123825.1  | PREDICTED: centrin-3 [Sus scrofa]                                                                                                                                                                                                                                                                   |     |     |     |     |
| gi 349732208 ref NP_001231856.1  | mitochondrial ribosomal protein S35 [Sus scrofa]                                                                                                                                                                                                                                                    | --- | --- | --- | --- |
| gi 350583519 ref XP_003125889.2  | PREDICTED: round spermatid basic protein 1-like [Sus scrofa]                                                                                                                                                                                                                                        | --- | --- | --- | --- |
| gi 12229602 sp Q9XS72.1 CD1A_PIG | RecName: Full=T-cell surface glycoprotein CD1a; AltName: CD_antigen=CD1a; Flags: Precursor >gi 47523190 ref NP_998996.1  T-cell surface glycoprotein CD1a precursor [Sus scrofa] >gi 6822270 gb AAF28737.1  CD1 antigen [Sus scrofa] >gi 4678984 gb AAD26983.1  AF059492_1 CD1 antigen [Sus scrofa] | --- | --- | --- | --- |
| gi 118764570 dbj BAF38758.1      | CD1A antigen [Sus scrofa]                                                                                                                                                                                                                                                                           |     |     |     |     |
| gi 118764597 dbj BAF38778.1      | CD1A1 antigen [Sus scrofa]                                                                                                                                                                                                                                                                          |     |     |     |     |
| gi 47523884 ref NP_999578.1      | cytochrome P450 2B22 precursor [Sus scrofa] >gi 19071836 dbj BAB85662.1  cytochrome P450 2B22 [Sus scrofa]                                                                                                                                                                                          | --- | --- | --- | --- |
| gi 335290417 ref XP_003356174.1  | PREDICTED: protein RER1-like [Sus scrofa]                                                                                                                                                                                                                                                           | --- | --- | --- | --- |
| gi 350585528 ref XP_003481       | PREDICTED: protein RER1-like                                                                                                                                                                                                                                                                        |     |     |     |     |

|                                  |                                                                                                                                                                                                      |     |     |     |     |
|----------------------------------|------------------------------------------------------------------------------------------------------------------------------------------------------------------------------------------------------|-----|-----|-----|-----|
| 980.1                            | [Sus scrofa]                                                                                                                                                                                         |     |     |     |     |
| gi 311260790 ref XP_003128538.1  | PREDICTED: serine/threonine-protein kinase ULK3 [Sus scrofa]                                                                                                                                         | --- | --- | --- | --- |
| gi 68565351 sp Q767L8.1 MDC1_PIG | RecName: Full=Mediator of DNA damage checkpoint protein 1 >gi 178056868 ref NP_001116610.1  mediator of DNA damage checkpoint protein 1 [Sus scrofa] >gi 41529174 dbj BAD08434.1  NFBD1 [Sus scrofa] | --- | --- | --- | --- |
| gi 311246626 ref XP_003122268.1  | PREDICTED: uncharacterized protein C9orf78-like [Sus scrofa]                                                                                                                                         | --- | --- | --- | --- |
| gi 350589666 ref XP_003482893.1  | PREDICTED: malignant T cell-amplified sequence 1-like [Sus scrofa] >gi 350589658 ref XP_003482889.1  PREDICTED: malignant T cell-amplified sequence 1-like [Sus scrofa]                              | --- | --- | --- | --- |
| gi 148747342 ref NP_001092055.1  | AP-3 complex subunit beta-1 [Sus scrofa] >gi 146741314 dbj BAF62312.1  adaptor-related protein complex 3, beta-1 subunit [Sus scrofa]                                                                | --- | --- | --- | --- |
| gi 335287423 ref XP_001929441.3  | PREDICTED: transcription initiation factor IIB [Sus scrofa]                                                                                                                                          | --- | --- | --- | --- |
| gi 346716308 ref NP_001231150.1  | RNA-binding protein 14 [Sus scrofa]                                                                                                                                                                  | --- | --- | --- | --- |
| gi 335308902 ref XP_003361415.1  | PREDICTED: heterogeneous nuclear ribonucleoprotein L-like [Sus scrofa]                                                                                                                               | --- | --- | --- | --- |
| gi 350579679 ref XP_003480661.1  | PREDICTED: niban-like protein 1-like [Sus scrofa]                                                                                                                                                    | --- | --- | --- | --- |
| gi 194034889 ref XP_001929437.1  | PREDICTED: zinc finger FYVE domain-containing protein 19 [Sus scrofa]                                                                                                                                | --- | --- | --- | --- |
| gi 350589849 ref XP_003357888.2  | PREDICTED: fibronectin type-III domain-containing protein 3A-like [Sus scrofa]                                                                                                                       | --- | --- | --- | --- |
| gi 350585300 ref XP_003127257.3  | PREDICTED: protein ETHE1, mitochondrial-like isoform 1 [Sus scrofa]                                                                                                                                  | --- | --- | --- | --- |
| gi 47522794 ref NP_999149.1      | small ubiquitin-related modifier 2 precursor [Sus                                                                                                                                                    | --- | --- | --- | --- |

|                                 |                                                                                                                                                                                                                                                           |     |     |     |     |
|---------------------------------|-----------------------------------------------------------------------------------------------------------------------------------------------------------------------------------------------------------------------------------------------------------|-----|-----|-----|-----|
|                                 | scrofa] >gi 48429127 sp P61958.1 SUMO2_PIG RecName: Full=Small ubiquitin-related modifier 2; Short=SUMO-2; AltName: Full=MIF2 suppressor; AltName: Full=SMT3 homolog 2; AltName: Full=Sentrin-2; AltNam                                                   |     |     |     |     |
| gi 335300844 ref XP_003359058.1 | PREDICTED: small ubiquitin-related modifier 3-like [Sus scrofa]                                                                                                                                                                                           |     |     |     |     |
| gi 194039401 ref XP_001929628.1 | PREDICTED: alanyl-tRNA synthetase, mitochondrial [Sus scrofa]                                                                                                                                                                                             | --- | --- | --- | --- |
| gi 109675377 gb ABG37112.1      | ataxia-telangiectasia mutated protein splice variant 7 [Sus scrofa]                                                                                                                                                                                       | --- | --- | --- | --- |
| gi 178056824 ref NP_001116552.1 | serine-protein kinase ATM [Sus scrofa] >gi 152031564 sp Q6PQD5.2 ATM_PIG RecName: Full=Serine-protein kinase ATM; AltName: Full=Ataxia telangiectasia mutated homolog; Short=A-T mutated homolog >gi 115433705 gb AAT01608.2  ataxia-telangiectasia mutat |     |     |     |     |
| gi 335302143 ref XP_003359391.1 | PREDICTED: nucleoplasmin-3-like [Sus scrofa]                                                                                                                                                                                                              | --- | --- | --- | --- |
| gi 118403762 ref NP_001072156.1 | extracellular superoxide dismutase precursor [Sus scrofa] >gi 115522015 gb ABJ09397.1  extracellular superoxide dismutase [Sus scrofa]                                                                                                                    | --- | --- | --- | --- |
| gi 58332866 ref NP_001011509.1  | heme-binding protein 1 [Sus scrofa] >gi 75040507 sp Q5ISC6.1 HEBP1_PIG RecName: Full=Heme-binding protein 1 >gi 51847749 gb AAU10512.1  heme-binding protein [Sus scrofa]                                                                                 | --- | --- | --- | --- |
| gi 350594366 ref XP_003134051.3 | PREDICTED: splicing regulatory glutamine/lysine-rich protein 1, partial [Sus scrofa]                                                                                                                                                                      | --- | --- | --- | --- |
| gi 311247104 ref XP_003122481.1 | PREDICTED: V-type proton ATPase 116 kDa subunit a isoform 3 [Sus scrofa]                                                                                                                                                                                  | --- | --- | --- | --- |
| gi 346986279 ref NP_001231      | serine/arginine-rich splicing factor 10                                                                                                                                                                                                                   | --- | --- | --- | --- |

|                                     |                                                                                                                                                            |     |     |     |     |
|-------------------------------------|------------------------------------------------------------------------------------------------------------------------------------------------------------|-----|-----|-----|-----|
| 297.1                               | isoform 2 [Sus scrofa]                                                                                                                                     |     |     |     |     |
| gi 346986281 ref NP_001231<br>298.1 | serine/arginine-rich splicing factor 10 isoform 1 [Sus scrofa] >gi 338784425 gb AEI98875.1  serine/arginine-rich splicing factor 10 isoform 2 [Sus scrofa] |     |     |     |     |
| gi 343183422 ref NP_001230<br>269.1 | proteasome inhibitor PI31 subunit [Sus scrofa]                                                                                                             | --- | --- | --- | --- |
| gi 350594770 ref XP_003483<br>974.1 | PREDICTED: proteasome inhibitor PI31 subunit-like [Sus scrofa]                                                                                             |     |     |     |     |
| gi 335300014 ref XP_003358<br>759.1 | PREDICTED: von Willebrand factor A domain-containing protein 5B2 [Sus scrofa]                                                                              | --- | --- | --- | --- |
| gi 335304240 ref XP_003359<br>898.1 | PREDICTED: tRNA (cytosine(34)-C(5))-methyltransferase isoform 2 [Sus scrofa]                                                                               | --- | --- | --- | --- |
| gi 335304242 ref XP_003134<br>206.2 | PREDICTED: tRNA (cytosine(34)-C(5))-methyltransferase isoform 1 [Sus scrofa]                                                                               |     |     |     |     |
| gi 350596463 ref XP_003484<br>278.1 | PREDICTED: high mobility group protein 20A-like [Sus scrofa] >gi 350586820 ref XP_003482285.1  PREDICTED: high mobility group protein 20A [Sus scrofa]     | --- | --- | --- | --- |
| gi 194038051 ref XP_001926<br>686.1 | PREDICTED: nuclear pore complex protein Nup153 [Sus scrofa]                                                                                                | --- | --- | --- | --- |
| gi 347300376 ref NP_001231<br>482.1 | 28S ribosomal protein S9, mitochondrial [Sus scrofa]                                                                                                       | --- | --- | --- | --- |
| gi 350583688 ref XP_003355<br>353.2 | PREDICTED: TBC1 domain family member 22A-like [Sus scrofa]                                                                                                 | --- | --- | --- | --- |
| gi 335290628 ref XP_003356<br>226.1 | PREDICTED: LOW QUALITY PROTEIN: heterochromatin protein 1-binding protein 3 [Sus scrofa]                                                                   | --- | --- | --- | --- |
| gi 350582787 ref XP_003481<br>357.1 | PREDICTED: low molecular weight phosphotyrosine protein phosphatase-like [Sus scrofa]                                                                      | --- | --- | --- | --- |
| gi 350596121 ref XP_003125<br>455.3 | PREDICTED: hypothetical protein LOC100516434 [Sus scrofa]                                                                                                  |     |     |     |     |
| gi 297747311 ref NP_001177<br>084.1 | coiled-coil-helix-coiled-coil-helix domain containing 1 [Sus scrofa]                                                                                       | --- | --- | --- | --- |
| gi 311247991 ref XP_003122<br>917.1 | PREDICTED: pyruvate dehydrogenase protein X                                                                                                                | --- | --- | --- | --- |

|                                   |                                                                                                                                                                                                                                                   |       |       |      |       |
|-----------------------------------|---------------------------------------------------------------------------------------------------------------------------------------------------------------------------------------------------------------------------------------------------|-------|-------|------|-------|
|                                   | component-like isoform 1 [Sus scrofa]                                                                                                                                                                                                             |       |       |      |       |
| gi 335282040 ref XP_003353955.1   | PREDICTED: pyruvate dehydrogenase protein X component-like isoform 2 [Sus scrofa]                                                                                                                                                                 |       |       |      |       |
| gi 350595129 ref XP_003360127.2   | PREDICTED: ATP-binding cassette sub-family B member 8, mitochondrial-like [Sus scrofa]                                                                                                                                                            | ---   | ---   | ---  | ---   |
| gi 1827456 dbj BAA19177.1         | metallothionein isoform [Sus scrofa]                                                                                                                                                                                                              | ---   | ---   | ---  | ---   |
| gi 350596343 ref XP_003361065.2   | PREDICTED: myomegalin-like, partial [Sus scrofa]                                                                                                                                                                                                  | ---   | ---   | ---  | ---   |
| gi 55776192 gb AAV65283.1         | cytochrome P450 2C34 [Sus scrofa]                                                                                                                                                                                                                 | ---   | ---   | ---  | ---   |
| gi 335291123 ref XP_003356402.1   | PREDICTED: receptor-type tyrosine-protein phosphatase mu-like [Sus scrofa]                                                                                                                                                                        | ---   | ---   | ---  | ---   |
| gi 350580860 ref XP_003123760.3   | PREDICTED: IQ motif containing GTPase activating protein 2 [Sus scrofa]                                                                                                                                                                           | ---   | ---   | ---  | ---   |
| gi 311246904 ref XP_003122389.1   | PREDICTED: torsin family protein C9orf167-like [Sus scrofa]                                                                                                                                                                                       | ---   | ---   | ---  | ---   |
| gi 14269035 gb AAK57999.1         | immunoglobulin lambda chain [Sus scrofa]                                                                                                                                                                                                          | 0.318 | 0.138 | 0.11 | 0.073 |
| gi 335310412 ref XP_003362020.1   | PREDICTED: centrin-2-like [Sus scrofa]                                                                                                                                                                                                            | ---   | ---   | ---  | ---   |
| gi 194035504 ref XP_001927493.1   | PREDICTED: vacuolar protein sorting-associated protein 28 homolog [Sus scrofa]                                                                                                                                                                    | ---   | ---   | ---  | ---   |
| gi 39931643 sp P83686.1 NB5R3_PIG | RecName: Full=NADH-cytochrome b5 reductase 3; Short=B5R; Short=Cytochrome b5 reductase; AltName: Full=Diaphorase-1 >gi 157832094 pdb 1NDH A Chain A, Crystal Structure Of Nadh-Cytochrome B5 Reductase From Pig Liver At 2.4 Angstroms Resolution | ---   | ---   | ---  | ---   |
| gi 311254975 ref XP_003126030.1   | PREDICTED: NADH-cytochrome b5 reductase 3-like [Sus scrofa]                                                                                                                                                                                       |       |       |      |       |
| gi 1827460 dbj BAA19179.1         | metallothionein isoform [Sus scrofa]                                                                                                                                                                                                              | ---   | ---   | ---  | ---   |
| gi 18202364 sp P79377.2 MT1D_PIG  | RecName: Full=Metallothionein-1D; Short=MT-1D; AltName:                                                                                                                                                                                           |       |       |      |       |

|                                      |                                                                                                                                                                               |  |  |  |  |
|--------------------------------------|-------------------------------------------------------------------------------------------------------------------------------------------------------------------------------|--|--|--|--|
|                                      | Full=Metallothionein-ID;<br>Short=MT-ID                                                                                                                                       |  |  |  |  |
| gi 18202365 sp P79378.1 MT<br>1F_PIG | RecName: Full=Metallothionein-1F;<br>Short=MT-1F; AltName:<br>Full=Metallothionein-IF;<br>Short=MT-IF >gi 1827466 dbj BAA1<br>9182.1  metallothionein isoform [Sus<br>scrofa] |  |  |  |  |

## Data file 2. Differentially expressed proteins

| Gene                                                                                                                                                                                                                                                                                      | W0d       | W1d       | W3d       | W5d       | W7d       |
|-------------------------------------------------------------------------------------------------------------------------------------------------------------------------------------------------------------------------------------------------------------------------------------------|-----------|-----------|-----------|-----------|-----------|
|                                                                                                                                                                                                                                                                                           | vs<br>W0d | vs<br>W0d | vs<br>W0d | vs<br>W0d | vs<br>W0d |
| gi 14269035 gb AAK57999.1  immunoglobulin lambda chain [Sus scrofa]                                                                                                                                                                                                                       | 1.000     | 0.318     | 0.138     | 0.110     | 0.073     |
| gi 47522616 ref NP_999102.1  ubiquitin-like protein FUBI precursor [Sus scrofa] >gi 1628628 gb AAB52915.1  ubiquitin-like/S30 ribosomal fusion protein [Sus scrofa]                                                                                                                       | 1.000     | 0.111     | 0.123     | 0.101     | 0.111     |
| gi 164505 gb AAA51294.1  immunoglobulin gamma-chain, partial [Sus scrofa]                                                                                                                                                                                                                 | 1.000     | 0.237     | 0.099     | 0.217     | 0.183     |
| gi 311252239 ref XP_003124992.1  PREDICTED: all-trans-retinol 13,14-reductase [Sus scrofa]                                                                                                                                                                                                | 1.000     | 0.520     | 0.200     | 0.307     | 0.231     |
| gi 50657386 ref NP_001002801.1  apolipoprotein C-III precursor [Sus scrofa] >gi 416627 sp P27917.2 APOC3_PIG RecName: Full=Apolipoprotein C-III; Short=Apo-CIII; Short=ApoC-III; AltName: Full=Apolipoprotein C3; Flags: Precursor >gi 164361 gb AAA30993.1  apolipoprotein C-III [Sus sc | 1.000     | 0.204     | 0.240     | 0.217     | 0.237     |
| gi 47522712 ref NP_999108.1  pyridoxal kinase [Sus scrofa] >gi 67470293 sp O46560.1 PDXK_PIG RecName: Full=Pyridoxal kinase; AltName: Full=Pyridoxine kinase >gi 2773404 gb AAB96794.1  pyridoxal kinase [Sus scrofa]                                                                     | 1.000     | 0.708     | 0.261     | 0.275     | 0.245     |
| gi 194039884 ref XP_001928592.1  PREDICTED: histone H2A type 1-like [Sus scrofa]                                                                                                                                                                                                          | 1.000     | 0.354     | 0.344     | 0.267     | 0.246     |
| gi 350529356 ref NP_001231917.1  NADH dehydrogenase (ubiquinone) Fe-S protein 5, 15kDa (NADH-coenzyme Q reductase) [Sus scrofa]                                                                                                                                                           | 1.000     | 0.217     | 0.436     | 0.519     | 0.262     |
| gi 311248247 ref XP_003123039.1  PREDICTED: ATP synthase subunit delta, mitochondrial-like isoform 1 [Sus scrofa]                                                                                                                                                                         | 1.000     | 0.280     | 0.385     | 0.346     | 0.274     |

|                                                                                                                                                                                                                                                                                                              |       |       |       |       |       |
|--------------------------------------------------------------------------------------------------------------------------------------------------------------------------------------------------------------------------------------------------------------------------------------------------------------|-------|-------|-------|-------|-------|
| gi 311259100 ref XP_003127931.1 <br>PREDICTED: meprin A subunit beta [Sus<br>scrofa]                                                                                                                                                                                                                         | 1.000 | 0.371 | 0.316 | 0.293 | 0.284 |
| gi 311254039 ref XP_003125724.1 <br>PREDICTED: mucosal pentraxin-like [Sus<br>scrofa]                                                                                                                                                                                                                        | 1.000 | 0.420 | 0.286 | 0.227 | 0.291 |
| gi 264681458 ref NP_001161123.1 <br>2-acylglycerol O-acyltransferase 2 [Sus<br>scrofa] >gi 262204904 dbj BAI48032.1 <br>monoacylglycerol O-acyltransferase 2 [Sus<br>scrofa]                                                                                                                                 | 1.000 | 0.608 | 0.314 | 0.222 | 0.311 |
| gi 298160993 ref NP_001177169.1 <br>glycerol-3-phosphate dehydrogenase [NAD+],<br>cytoplasmic [Sus scrofa]                                                                                                                                                                                                   | 1.000 | 0.658 | 0.354 | 0.279 | 0.313 |
| gi 346421378 ref NP_001231061.1  serpin H1<br>precursor [Sus scrofa]                                                                                                                                                                                                                                         | 1.000 | 0.667 | 0.740 | 0.490 | 0.320 |
| gi 347300323 ref NP_001231460.1 <br>thioredoxin-dependent peroxide reductase,<br>mitochondrial [Sus scrofa]                                                                                                                                                                                                  | 1.000 | 0.606 | 0.676 | 0.513 | 0.331 |
| gi 198282001 ref NP_001123683.1  transcription<br>factor A, mitochondrial precursor [Sus<br>scrofa] >gi 75052621 sp Q5D144.1 TFAM_PIG<br>RecName: Full=Transcription factor A,<br>mitochondrial; Short=mtTFA; Flags:<br>Precursor >gi 60326706 gb AAX18878.1 <br>mitochondrial transcription factor A [Sus s | 1.000 | 0.487 | 0.264 | 0.384 | 0.359 |
| gi 350586831 ref XP_003482287.1 <br>PREDICTED: cytochrome c oxidase subunit 5A,<br>mitochondrial-like isoform 1 [Sus<br>scrofa] >gi 350586833 ref XP_003482288.1 <br>PREDICTED: cytochrome c oxidase subunit 5A,<br>mitochondrial-like isoform 2 [Sus scrofa]                                                | 1.000 | 0.260 | 0.519 | 0.473 | 0.375 |
| gi 226709210 sp A1XQT2.1 COX6C_PIG<br>RecName: Full=Cytochrome c oxidase subunit<br>6C; AltName: Full=Cytochrome c oxidase<br>polypeptide<br>VIc >gi 148225574 ref NP_001090942.1 <br>cytochrome c oxidase subunit 6C [Sus<br>scrofa] >gi 117660798 gb ABK55638.1  COX6C<br>[Sus scrofa]                     | 1.000 | 0.532 | 0.350 | 0.448 | 0.376 |
| gi 350594035 ref XP_003483822.1 <br>PREDICTED: UDP-glucuronosyltransferase<br>1-10 isoform 3 [Sus scrofa]                                                                                                                                                                                                    | 1.000 | 0.561 | 0.348 | 0.404 | 0.378 |



|                                                                                                                                                                                                                                                                                           |       |       |       |       |       |
|-------------------------------------------------------------------------------------------------------------------------------------------------------------------------------------------------------------------------------------------------------------------------------------------|-------|-------|-------|-------|-------|
| gi 55926217 ref NP_001007518.1  cytochrome c oxidase subunit 5B, mitochondrial precursor [Sus scrofa] >gi 75042739 sp Q5S3G4.1 COX5B_PIG RecName: Full=Cytochrome c oxidase subunit 5B, mitochondrial; AltName: Full=Cytochrome c oxidase polypeptide Vb; Flags: Precursor >gi 55583747 g | 1.000 | 0.467 | 0.331 | 0.397 | 0.379 |
| gi 350538593 ref NP_001233247.1  phosphoglucomutase-1 [Sus scrofa] >gi 321574209 gb ADW94631.1  phosphoglucomutase 1 [Sus scrofa]                                                                                                                                                         | 1.000 | 1.170 | 0.359 | 0.319 | 0.381 |
| gi 350582932 ref XP_003125549.2  PREDICTED: annexin A13 isoform 2 [Sus scrofa]                                                                                                                                                                                                            | 1.000 | 0.380 | 0.322 | 0.384 | 0.386 |
| gi 335290692 ref XP_003356250.1  PREDICTED: UDP-glucose 4-epimerase [Sus scrofa]                                                                                                                                                                                                          | 1.000 | 0.766 | 0.240 | 0.268 | 0.393 |
| gi 350580438 ref XP_003480823.1  PREDICTED: NADH dehydrogenase [ubiquinone] 1 beta subcomplex subunit 7-like [Sus scrofa]                                                                                                                                                                 | 1.000 | 0.407 | 0.396 | 0.258 | 0.394 |
| gi 350584800 ref XP_003355778.2  PREDICTED: cytochrome c oxidase subunit 4 isoform 1, mitochondrial-like [Sus scrofa]                                                                                                                                                                     | 1.000 | 0.500 | 0.278 | 0.305 | 0.408 |
| gi 51317314 sp P62802.2 H4_PIG RecName: Full=Histone H4 >gi 350583428 ref XP_003481515.1  PREDICTED: histone H4-like [Sus scrofa] >gi 335291880 ref XP_003356614.1  PREDICTED: histone H4-like [Sus scrofa] >gi 335287016 ref XP_003355252.1  PREDICTED: histone H4-like [Sus scrofa] >g  | 1.000 | 0.435 | 0.532 | 0.445 | 0.417 |
| gi 311259388 ref XP_003128071.1  PREDICTED: cytochrome b-c1 complex subunit 6, mitochondrial-like [Sus scrofa]                                                                                                                                                                            | 1.000 | 0.606 | 0.434 | 0.581 | 0.418 |
| gi 335281280 ref XP_003122383.2  PREDICTED: apical endosomal glycoprotein [Sus scrofa]                                                                                                                                                                                                    | 1.000 | 0.502 | 0.431 | 0.468 | 0.419 |
| gi 311246132 ref XP_003122091.1  PREDICTED: 39S ribosomal protein L50, mitochondrial-like [Sus scrofa]                                                                                                                                                                                    | 1.000 | 0.428 | 0.347 | 0.475 | 0.429 |
| gi 335281047 ref XP_003353724.1  PREDICTED: LOW QUALITY PROTEIN:                                                                                                                                                                                                                          | 1.000 | 0.817 | 0.381 | 0.401 | 0.431 |

|                                                                                                                                                                                                                                                                                                 |       |       |       |       |       |
|-------------------------------------------------------------------------------------------------------------------------------------------------------------------------------------------------------------------------------------------------------------------------------------------------|-------|-------|-------|-------|-------|
| long-chain fatty acid transport protein 4 [Sus scrofa]                                                                                                                                                                                                                                          |       |       |       |       |       |
| gi 219521964 ref NP_001137170.1 <br>long-chain-fatty-acid--CoA ligase 3 [Sus scrofa] >gi 217314893 gb ACK36981.1 <br>acyl-CoA synthetase long-chain family member 3 [Sus scrofa]                                                                                                                | 1.000 | 0.559 | 0.389 | 0.335 | 0.432 |
| gi 345090979 ref NP_001230725.1  NADH dehydrogenase (ubiquinone) Fe-S protein 3, 30kDa (NADH-coenzyme Q reductase) [Sus scrofa]                                                                                                                                                                 | 1.000 | 0.510 | 0.285 | 0.248 | 0.434 |
| gi 335299760 ref XP_003358667.1 <br>PREDICTED: neprilysin isoform 2 [Sus scrofa] >gi 311269573 ref XP_003132549.1 <br>PREDICTED: neprilysin isoform 1 [Sus scrofa]                                                                                                                              | 1.000 | 0.571 | 0.385 | 0.373 | 0.435 |
| gi 311264036 ref XP_003129968.1 <br>PREDICTED: 40S ribosomal protein S25-like isoform 2 [Sus scrofa] >gi 311264034 ref XP_003129967.1 <br>PREDICTED: 40S ribosomal protein S25-like isoform 1 [Sus scrofa]                                                                                      | 1.000 | 0.408 | 0.174 | 0.194 | 0.439 |
| gi 164507 gb AAA51295.1  immunoglobulin gamma-chain [Sus scrofa]                                                                                                                                                                                                                                | 1.000 | 0.635 | 0.488 | 0.566 | 0.442 |
| gi 335284501 ref XP_003124603.2 <br>PREDICTED: cytochrome b-c1 complex subunit 2, mitochondrial-like [Sus scrofa]                                                                                                                                                                               | 1.000 | 0.886 | 0.408 | 0.423 | 0.451 |
| gi 3913046 sp O46409.1 APOA4_PIG RecName: Full=Apolipoprotein A-IV; Short=Apo-AIV; Short=ApoA-IV; AltName: Full=Apolipoprotein A4; Flags: Precursor >gi 47523830 ref NP_999553.1 <br>apolipoprotein A-IV precursor [Sus scrofa] >gi 2695742 emb CAA11020.1 <br>apolipoprotein A-IV [Sus scrofa] | 1.000 | 0.558 | 0.390 | 0.478 | 0.451 |
| gi 3746946 gb AAC64131.1 <br>phosphoglucomutase 1 [Sus scrofa] >gi 3746944 gb AAC64130.1 <br>phosphoglucomutase 1 [Sus scrofa]                                                                                                                                                                  | 1.000 | 0.855 | 0.665 | 0.452 | 0.453 |
| gi 335297609 ref XP_003358079.1 <br>PREDICTED: synaptic vesicle membrane protein VAT-1 homolog [Sus scrofa]                                                                                                                                                                                     | 1.000 | 0.788 | 0.386 | 0.515 | 0.459 |
| gi 85687558 sp Q4A3R3.1 DMBT1_PIG RecName: Full=Deleted in malignant brain                                                                                                                                                                                                                      | 1.000 | 0.397 | 0.523 | 0.555 | 0.462 |

|                                                                                                                                                                                                                                                                                                            |       |       |       |       |       |
|------------------------------------------------------------------------------------------------------------------------------------------------------------------------------------------------------------------------------------------------------------------------------------------------------------|-------|-------|-------|-------|-------|
| tumors 1 protein; AltName: Full=Hensin; Flags:<br>Precursor >gi 73531021 emb CAJ27171.1 <br>DMBT1 protein [Sus scrofa]                                                                                                                                                                                     |       |       |       |       |       |
| gi 335279750 ref XP_003353424.1 <br>PREDICTED: normal mucosa of<br>esophagus-specific gene 1 protein-like isoform 2<br>[Sus scrofa] >gi 194034801 ref XP_001925712.1 <br>PREDICTED: normal mucosa of<br>esophagus-specific gene 1 protein-like isoform 1<br>[Sus scrofa]                                   | 1.000 | 0.512 | 0.430 | 0.425 | 0.466 |
| gi 346986456 ref NP_001231378.1  nucleoside<br>diphosphate kinase 3 isoform 1 precursor [Sus<br>scrofa]                                                                                                                                                                                                    | 1.000 | 0.489 | 0.953 | 0.592 | 0.467 |
| gi 51701269 sp Q95334.1 AMPE_PIG RecName:<br>Full=Glutamyl aminopeptidase; Short=EAP;<br>AltName: Full=Aminopeptidase A; Short=AP-A;<br>AltName:<br>CD_antigen=CD249 >gi 47522856 ref NP_99918<br>2.1  glutamyl aminopeptidase [Sus<br>scrofa] >gi 1518865 gb AAB07141.1 <br>aminopeptidase A [Sus scrofa] | 1.000 | 0.519 | 0.634 | 0.513 | 0.467 |
| gi 264681460 ref NP_001161124.1  acyl carrier<br>protein, mitochondrial [Sus<br>scrofa] >gi 262204908 dbj BAI48034.1  NADH<br>dehydrogenase (ubiquinone) 1, alpha/beta<br>subcomplex, 1, 8kDa [Sus scrofa]                                                                                                 | 1.000 | 0.350 | 0.688 | 0.513 | 0.468 |
| gi 347658971 ref NP_001231613.1  ATP<br>synthase, H <sup>+</sup> transporting, mitochondrial Fo<br>complex, subunit d [Sus scrofa]                                                                                                                                                                         | 1.000 | 0.489 | 0.543 | 0.446 | 0.473 |
| gi 350581874 ref XP_003124716.3 <br>PREDICTED: rab11 family-interacting protein<br>3-like [Sus scrofa]                                                                                                                                                                                                     | 1.000 | 0.509 | 0.444 | 0.527 | 0.474 |
| gi 136192 sp P09571.2 TRFE_PIG RecName:<br>Full=Serotransferrin; Short=Transferrin;<br>AltName: Full=Beta-1 metal-binding globulin;<br>AltName:<br>Full=Siderophilin >gi 18655907 pdb 1H76 A<br>Chain A, The Crystal Structure Of Diferric<br>Porcine Serum Transferrin                                    | 1.000 | 0.803 | 0.460 | 0.442 | 0.476 |
| gi 347300360 ref NP_001231474.1 <br>serine/arginine repetitive matrix protein 2 [Sus<br>scrofa]                                                                                                                                                                                                            | 1.000 | 0.351 | 0.966 | 0.517 | 0.477 |
| gi 311247022 ref XP_003122449.1                                                                                                                                                                                                                                                                            | 1.000 | 0.425 | 0.525 | 0.890 | 0.481 |

|                                                                                                                                                                                                                                                                                              |       |       |       |       |       |
|----------------------------------------------------------------------------------------------------------------------------------------------------------------------------------------------------------------------------------------------------------------------------------------------|-------|-------|-------|-------|-------|
| PREDICTED: cadherin-related family member 5 [Sus scrofa]                                                                                                                                                                                                                                     |       |       |       |       |       |
| gi 311248380 ref XP_003123108.1 <br>PREDICTED: cyclic AMP-responsive element-binding protein 3-like protein 3-like isoform 1 [Sus scrofa]                                                                                                                                                    | 1.000 | 1.073 | 0.511 | 0.489 | 0.485 |
| gi 194036463 ref XP_001928684.1 <br>PREDICTED: ras-related protein Rap-1A isoform 1 [Sus scrofa] >gi 335287176 ref XP_003355289.1 <br>PREDICTED: ras-related protein Rap-1A isoform 2 [Sus scrofa]                                                                                           | 1.000 | 0.726 | 0.228 | 0.197 | 0.487 |
| gi 47523730 ref NP_999500.1  tropomyosin alpha-4 chain [Sus scrofa] >gi 54039746 sp P67937.3 TPM4_PIG<br>RecName: Full=Tropomyosin alpha-4 chain; AltName: Full=Tropomyosin-4 >gi 3661527 gb AAC61744.1  tropomyosin 4 [Sus scrofa] >gi 262263207 dbj BAI48106.1  tropomyosin 4 [Sus scrofa] | 1.000 | 0.496 | 0.857 | 0.634 | 0.489 |
| gi 222090420 gb ACM42418.1  carnitine palmitoyltransferase II [Sus scrofa]                                                                                                                                                                                                                   | 1.000 | 1.253 | 0.307 | 0.223 | 0.492 |
| gi 311257850 ref XP_003127328.1 <br>PREDICTED: 17-beta-hydroxysteroid dehydrogenase 14-like [Sus scrofa]                                                                                                                                                                                     | 1.000 | 1.285 | 0.541 | 0.462 | 0.492 |
| gi 114689 sp P13618.1 ATP5J_PIG RecName: Full=ATP synthase-coupling factor 6, mitochondrial; Short=ATPase subunit F6                                                                                                                                                                         | 1.000 | 0.351 | 0.632 | 0.768 | 0.496 |
| gi 121118 sp P20305.1 GELS_PIG RecName: Full=Gelsolin; AltName: Full=Actin-depolymerizing factor; Short=ADF; AltName: Full=Brevin; Flags: Precursor >gi 164472 gb AAA31042.1  plasma gelsolin precursor, partial [Sus scrofa] >gi 758306 emb CAA32077.1  gelsolin [Sus scrofa]               | 1.000 | 0.313 | 0.654 | 0.571 | 0.497 |
| gi 335310428 ref XP_003362028.1 <br>PREDICTED: surfeit locus protein 4-like, partial [Sus scrofa]                                                                                                                                                                                            | 1.000 | 0.968 | 0.242 | 0.240 | 0.501 |
| gi 147225127 emb CAN13255.1  novel protein similar to butyrophilin family proteins [Sus scrofa]                                                                                                                                                                                              | 1.000 | 0.673 | 0.418 | 0.595 | 0.502 |

|                                                                                                                                                                                                                                                                                                               |       |       |       |       |       |
|---------------------------------------------------------------------------------------------------------------------------------------------------------------------------------------------------------------------------------------------------------------------------------------------------------------|-------|-------|-------|-------|-------|
| gi 350592201 ref XP_003359029.2 <br>PREDICTED: hypothetical protein<br>LOC100620809 isoform 1, partial [Sus scrofa]                                                                                                                                                                                           | 1.000 | 0.604 | 0.664 | 0.798 | 0.503 |
| gi 311252952 ref XP_003125350.1 <br>PREDICTED: ketohexokinase-like isoform 3<br>[Sus scrofa]                                                                                                                                                                                                                  | 1.000 | 0.538 | 0.556 | 0.633 | 0.506 |
| gi 297747368 ref NP_001172101.1 <br>ubiquinol-cytochrome c reductase binding<br>protein [Sus scrofa]                                                                                                                                                                                                          | 1.000 | 0.352 | 0.887 | 1.053 | 0.506 |
| gi 311275469 ref XP_003134753.1 <br>PREDICTED: calumenin isoform 2 [Sus scrofa]                                                                                                                                                                                                                               | 1.000 | 0.129 | 1.092 | 0.556 | 0.512 |
| gi 356614808 gb AET25525.1  mitochondrial<br>NADH dehydrogenase Fe-S protein 4 [Sus<br>scrofa]                                                                                                                                                                                                                | 1.000 | 0.432 | 0.564 | 0.552 | 0.513 |
| gi 344259276 gb AEN03335.1  proteasome<br>subunit beta type 6 [Sus<br>scrofa] >gi 344259274 gb AEN03334.1 <br>proteasome subunit beta type 6 [Sus scrofa]                                                                                                                                                     | 1.000 | 2.594 | 0.743 | 1.107 | 0.517 |
| gi 350593495 ref XP_003483700.1 <br>PREDICTED: LOW QUALITY PROTEIN:<br>glycerol-3-phosphate dehydrogenase,<br>mitochondrial [Sus scrofa]                                                                                                                                                                      | 1.000 | 0.709 | 0.479 | 0.534 | 0.518 |
| gi 311253020 ref XP_003125380.1 <br>PREDICTED: putative peptidyl-tRNA hydrolase<br>PTRHD1-like [Sus scrofa]                                                                                                                                                                                                   | 1.000 | 0.406 | 0.392 | 0.647 | 0.521 |
| gi 335290029 ref XP_003356052.1 <br>PREDICTED: nuclear pore glycoprotein p62<br>[Sus scrofa]                                                                                                                                                                                                                  | 1.000 | 0.611 | 0.516 | 0.685 | 0.524 |
| gi 47523548 ref NP_999398.1  glutaredoxin-1<br>[Sus<br>scrofa] >gi 121442 sp P12309.2 GLRX1_PIG<br>RecName: Full=Glutaredoxin-1; AltName:<br>Full=Thioltransferase-1;<br>Short=TTase-1 >gi 332368592 gb AEE61370.1 <br>glutaredoxin [Sus<br>scrofa] >gi 326632057 gb ADZ99031.1 <br>glutaredoxin [Sus scrofa] | 1.000 | 0.250 | 0.475 | 0.406 | 0.527 |
| gi 350591601 ref XP_003132498.3 <br>PREDICTED: sodium/potassium-transporting<br>ATPase subunit beta-3-like [Sus scrofa]                                                                                                                                                                                       | 1.000 | 0.747 | 0.364 | 0.396 | 0.531 |
| gi 350585425 ref XP_003127517.3 <br>PREDICTED: isochorismatase<br>domain-containing protein 2, mitochondrial-like                                                                                                                                                                                             | 1.000 | 0.409 | 1.462 | 1.207 | 0.534 |

|                                                                                                                                                                                                                                                                                                                  |       |       |       |       |       |
|------------------------------------------------------------------------------------------------------------------------------------------------------------------------------------------------------------------------------------------------------------------------------------------------------------------|-------|-------|-------|-------|-------|
| isoform 1, partial [Sus scrofa]                                                                                                                                                                                                                                                                                  |       |       |       |       |       |
| gi 311255413 ref XP_001927240.2 <br>PREDICTED: keratin, type II cytoskeletal 79<br>[Sus scrofa]                                                                                                                                                                                                                  | 1.000 | 0.422 | 0.675 | 0.754 | 0.534 |
| gi 148887343 sp Q9MYT8.4 ATP5I_PIG<br>RecName: Full=ATP synthase subunit e,<br>mitochondrial; Short=ATPase subunit e                                                                                                                                                                                             | 1.000 | 0.728 | 0.624 | 0.575 | 0.535 |
| gi 350596379 ref XP_003484266.1 <br>PREDICTED: vesicle-trafficking protein<br>SEC22b-like [Sus<br>scrofa] >gi 350583458 ref XP_003481524.1 <br>PREDICTED: vesicle-trafficking protein<br>SEC22b [Sus scrofa]                                                                                                     | 1.000 | 0.749 | 0.447 | 0.474 | 0.538 |
| gi 4033507 sp P08132.2 ANXA4_PIG RecName:<br>Full=Annexin A4; AltName: Full=35-beta<br>calcimedlin; AltName: Full=Annexin IV;<br>AltName: Full=Annexin-4; AltName:<br>Full=Chromobindin-4; AltName:<br>Full=Endonexin I; AltName: Full=Lipocortin IV;<br>AltName: Full=P32.5; AltName: Full=PP4-X;<br>AltName: F | 1.000 | 0.597 | 0.527 | 0.325 | 0.539 |
| gi 89216 pir  PT0220 Ig lambda chain V-C region<br>PLC3 - pig (fragment)                                                                                                                                                                                                                                         | 1.000 | 0.534 | 0.840 | 0.664 | 0.541 |
| gi 47522760 ref NP_999131.1  long-chain<br>3-ketoacyl-CoA thiolase [Sus<br>scrofa] >gi 6165556 gb AAF04612.1 AF028007_<br>1 long-chain 3-ketoacyl-CoA thiolase [Sus<br>scrofa]                                                                                                                                   | 1.000 | 0.787 | 0.430 | 0.440 | 0.542 |
| gi 194038067 ref XP_001927944.1 <br>PREDICTED: protein DEK isoform 1 [Sus<br>scrofa]                                                                                                                                                                                                                             | 1.000 | 0.564 | 0.737 | 1.077 | 0.544 |
| gi 350583970 ref XP_003126216.3 <br>PREDICTED: keratin, type II cytoskeletal<br>75-like [Sus scrofa]                                                                                                                                                                                                             | 1.000 | 0.448 | 0.680 | 0.760 | 0.546 |
| gi 350583385 ref XP_001927905.3 <br>PREDICTED: tuftelin, partial [Sus scrofa]                                                                                                                                                                                                                                    | 1.000 | 0.927 | 0.974 | 1.298 | 0.546 |
| gi 350586576 ref XP_001929450.4 <br>PREDICTED: LOW QUALITY PROTEIN:<br>peptidyl-prolyl cis-trans isomerase FKBP5 [Sus<br>scrofa]                                                                                                                                                                                 | 1.000 | 0.774 | 0.520 | 0.632 | 0.547 |
| gi 347922148 ref NP_001231673.1  charged<br>multivesicular body protein 5 [Sus scrofa]                                                                                                                                                                                                                           | 1.000 | 0.442 | 0.792 | 1.053 | 0.549 |
| gi 347446687 ref NP_001231527.1  glucosidase 2                                                                                                                                                                                                                                                                   | 1.000 | 0.456 | 0.593 | 0.593 | 0.549 |

|                                                                                                                                                                                                                                                                                               |       |       |       |       |       |
|-----------------------------------------------------------------------------------------------------------------------------------------------------------------------------------------------------------------------------------------------------------------------------------------------|-------|-------|-------|-------|-------|
| subunit beta precursor [Sus scrofa]                                                                                                                                                                                                                                                           |       |       |       |       |       |
| gi 350276134 ref NP_001231877.1  LETM1 and EF-hand domain-containing protein 1, mitochondrial [Sus scrofa]                                                                                                                                                                                    | 1.000 | 0.568 | 0.701 | 0.726 | 0.558 |
| gi 350586356 ref XP_003482168.1  PREDICTED: ribosylidihydronicotinamide dehydrogenase [quinone]-like [Sus scrofa]                                                                                                                                                                             | 1.000 | 1.234 | 0.977 | 1.294 | 0.558 |
| gi 311245734 ref XP_003121939.1  PREDICTED: hypothetical protein LOC100038023 [Sus scrofa] >gi 311245732 ref XP_003121938.1  PREDICTED: hypothetical protein LOC100038023 [Sus scrofa]                                                                                                        | 1.000 | 0.464 | 0.315 | 0.345 | 0.559 |
| gi 335291231 ref XP_003356440.1  PREDICTED: desmoglein-2 [Sus scrofa]                                                                                                                                                                                                                         | 1.000 | 0.805 | 0.477 | 0.561 | 0.564 |
| gi 385862179 ref NP_001245364.1  protein diaphanous homolog 1 [Sus scrofa]                                                                                                                                                                                                                    | 1.000 | 0.625 | 0.552 | 0.764 | 0.564 |
| gi 311276931 ref XP_003135414.1  PREDICTED: U3 small nucleolar RNA-associated protein 14 homolog A-like isoform 1 [Sus scrofa]                                                                                                                                                                | 1.000 | 0.440 | 0.533 | 0.443 | 0.578 |
| gi 113205854 ref NP_001038066.1  40S ribosomal protein S3 [Sus scrofa] >gi 115502828 sp Q0Z8U2.1 RS3_PIG RecName: Full=40S ribosomal protein S3 >gi 110006645 gb ABG48767.1  ribosomal protein S3 [Sus scrofa]                                                                                | 1.000 | 0.590 | 0.430 | 0.367 | 0.585 |
| gi 335308509 ref XP_003361258.1  PREDICTED: microsomal glutathione S-transferase 2-like, partial [Sus scrofa]                                                                                                                                                                                 | 1.000 | 0.711 | 0.282 | 0.335 | 0.585 |
| gi 122142619 sp Q19S50.1 STAT3_PIG RecName: Full=Signal transducer and activator of transcription 3 >gi 113205774 ref NP_001038045.1  signal transducer and activator of transcription 3 [Sus scrofa] >gi 315273320 gb ADU03227.1  signal transducer and activator of transcription 3 isoform | 1.000 | 0.697 | 0.816 | 0.729 | 0.586 |
| gi 54873401 gb AAV40980.1  heat shock 60 kDa protein 1 [Sus scrofa]                                                                                                                                                                                                                           | 1.000 | 1.229 | 0.463 | 0.450 | 0.587 |
| gi 335310769 ref XP_003362184.1  PREDICTED: THO complex subunit 4-like, partial [Sus scrofa]                                                                                                                                                                                                  | 1.000 | 0.639 | 0.688 | 0.742 | 0.587 |
| gi 335309593 ref XP_003361696.1                                                                                                                                                                                                                                                               | 1.000 | 0.419 | 0.930 | 0.562 | 0.587 |

|                                                                                                                                                                                                                                                                                           |       |       |       |       |       |
|-------------------------------------------------------------------------------------------------------------------------------------------------------------------------------------------------------------------------------------------------------------------------------------------|-------|-------|-------|-------|-------|
| PREDICTED: 39S ribosomal protein L12, mitochondrial-like, partial [Sus scrofa]                                                                                                                                                                                                            |       |       |       |       |       |
| gi 118675 sp P09623.1 DLDH_PIG RecName: Full=Dihydrolipoyl dehydrogenase, mitochondrial; AltName: Full=Dihydrolipoamide dehydrogenase; Flags: Precursor >gi 47522940 ref NP_999227.1  dihydrolipoyl dehydrogenase, mitochondrial precursor [Sus scrofa] >gi 164539 gb AAA31069.1  lipoam  | 1.000 | 0.665 | 0.684 | 0.543 | 0.589 |
| gi 311274155 ref XP_003134215.1  PREDICTED: NADH dehydrogenase [ubiquinone] iron-sulfur protein 6, mitochondrial-like [Sus scrofa]                                                                                                                                                        | 1.000 | 0.891 | 0.494 | 1.079 | 0.589 |
| gi 148235351 ref NP_001090944.1  NADH dehydrogenase ubiquinone flavoprotein 2 [Sus scrofa] >gi 117660947 gb ABK55646.1  NDUFV2 [Sus scrofa]                                                                                                                                               | 1.000 | 0.501 | 0.531 | 0.567 | 0.591 |
| gi 308081427 ref NP_001183950.1  hydroxysteroid dehydrogenase-like protein 2 [Sus scrofa]                                                                                                                                                                                                 | 1.000 | 0.789 | 0.489 | 0.551 | 0.593 |
| gi 350590640 ref XP_003131788.3  PREDICTED: myosin-Id [Sus scrofa]                                                                                                                                                                                                                        | 1.000 | 0.750 | 0.444 | 0.530 | 0.597 |
| gi 116551 sp P04404.2 CMGA_PIG RecName: Full=Chromogranin-A; Short=CgA; Contains: RecName: Full=Pancreastatin; Contains: RecName: Full=Parastatin; Contains: RecName: Full=WE-14; Flags: Precursor >gi 164417 gb AAA31016.1  chromogranin A precursor, partial [Sus scrofa]               | 1.000 | 0.486 | 0.982 | 0.552 | 0.599 |
| gi 46396062 sp Q865F1.1 MTP_PIG RecName: Full=Microsomal triglyceride transfer protein large subunit; Flags: Precursor >gi 47523450 ref NP_999350.1  microsomal triglyceride transfer protein large subunit precursor [Sus scrofa] >gi 28974486 gb AAO61497.1  microsomal triglyceride tr | 1.000 | 0.965 | 0.461 | 0.435 | 0.601 |
| gi 298160936 ref NP_001177146.1  transmembrane protein C9orf46 [Sus scrofa]                                                                                                                                                                                                               | 1.000 | 0.545 | 0.350 | 0.364 | 0.601 |
| gi 47522662 ref NP_999076.1  membrane-associated progesterone receptor component 1 [Sus                                                                                                                                                                                                   | 1.000 | 0.562 | 0.373 | 0.608 | 0.603 |



|                                                                                                                                                                                                                                                                                                          |       |       |       |       |       |
|----------------------------------------------------------------------------------------------------------------------------------------------------------------------------------------------------------------------------------------------------------------------------------------------------------|-------|-------|-------|-------|-------|
| scrofa] >gi 6647580 sp Q95250.3 PGRC1_PIG<br>RecName: Full=Membrane-associated<br>progesterone receptor component<br>1 >gi 1657409 emb CAA68050.1  steroid<br>membrane binding protein [Sus scrofa]                                                                                                      |       |       |       |       |       |
| gi 350585373 ref XP_003127406.3 <br>PREDICTED: myosin-14-like [Sus scrofa]                                                                                                                                                                                                                               | 1.000 | 0.667 | 0.776 | 0.842 | 0.605 |
| gi 194037554 ref XP_001929445.1 <br>PREDICTED: ATP synthase subunit beta,<br>mitochondrial [Sus scrofa]                                                                                                                                                                                                  | 1.000 | 0.748 | 0.423 | 0.355 | 0.607 |
| gi 299611 gb AAB26236.1  cerebroside sulfate<br>activator, CS-Act [swine, kidneys, Peptide, 79<br>aa]                                                                                                                                                                                                    | 1.000 | 0.957 | 0.947 | 1.163 | 0.607 |
| gi 47523768 ref NP_999520.1  epoxide hydrolase<br>1 precursor [Sus<br>scrofa] >gi 75069447 sp P79381.1 HYEP_PIG<br>RecName: Full=Epoxide hydrolase 1; AltName:<br>Full=Epoxide hydratase; AltName:<br>Full=Microsomal epoxide<br>hydrolase >gi 1840391 dbj BAA19200.1  epoxide<br>hydrolase [Sus scrofa] | 1.000 | 0.733 | 0.492 | 0.311 | 0.608 |
| gi 350582175 ref XP_003481218.1 <br>PREDICTED: mitochondrial inner membrane<br>protein, partial [Sus scrofa]                                                                                                                                                                                             | 1.000 | 0.546 | 0.513 | 0.778 | 0.610 |
| gi 350584002 ref XP_003126228.3 <br>PREDICTED: keratin, type I cytoskeletal 18 [Sus<br>scrofa]                                                                                                                                                                                                           | 1.000 | 0.903 | 0.753 | 0.534 | 0.611 |
| gi 311258550 ref XP_003127676.1 <br>PREDICTED: EF-hand domain-containing<br>protein D2-like [Sus scrofa]                                                                                                                                                                                                 | 1.000 | 0.429 | 0.804 | 0.768 | 0.614 |
| gi 2258465 gb AAB94003.1  succinyl-CoA<br>synthetase alpha subunit [Sus scrofa]                                                                                                                                                                                                                          | 1.000 | 0.610 | 0.582 | 0.448 | 0.616 |
| gi 311253799 ref XP_001926739.2 <br>PREDICTED: ras-related protein Rab-2A [Sus<br>scrofa]                                                                                                                                                                                                                | 1.000 | 1.027 | 0.390 | 0.427 | 0.617 |
| gi 349732227 ref NP_001231859.1 <br>heterogeneous nuclear ribonucleoprotein M [Sus<br>scrofa]                                                                                                                                                                                                            | 1.000 | 0.574 | 0.507 | 0.477 | 0.618 |
| gi 5542425 pdb 1QPW D Chain D, Crystal<br>Structure Determination Of Porcine Hemoglobin<br>At 1.8a Resolution >gi 5542423 pdb 1QPW B<br>Chain B, Crystal Structure Determination Of<br>Porcine Hemoglobin At 1.8a                                                                                        | 1.000 | 0.842 | 0.728 | 0.606 | 0.619 |

|                                                                                                                                                                                                                                                                                            |       |       |       |       |       |
|--------------------------------------------------------------------------------------------------------------------------------------------------------------------------------------------------------------------------------------------------------------------------------------------|-------|-------|-------|-------|-------|
| Resolution >gi 809285 pdb 2PGH D Chain D, Structure Determination Of Aquo                                                                                                                                                                                                                  |       |       |       |       |       |
| gi 297632426 ref NP_001172096.1  signal sequence receptor, alpha [Sus scrofa]                                                                                                                                                                                                              | 1.000 | 0.756 | 0.387 | 0.391 | 0.624 |
| gi 47523792 ref NP_999532.1  catenin beta-1 [Sus scrofa] >gi 167834655 gb ACA03158.1  beta-catenin [Sus scrofa] >gi 18146999 dbj BAB82984.1  beta-catenin [Sus scrofa]                                                                                                                     | 1.000 | 0.615 | 0.612 | 0.533 | 0.625 |
| gi 311254317 ref XP_001927973.2  PREDICTED: cingulin-like [Sus scrofa]                                                                                                                                                                                                                     | 1.000 | 0.549 | 0.991 | 0.920 | 0.625 |
| gi 194038586 ref XP_001926746.1  PREDICTED: transmembrane emp24 domain-containing protein 10 [Sus scrofa]                                                                                                                                                                                  | 1.000 | 0.582 | 0.399 | 0.461 | 0.628 |
| gi 47522864 ref NP_999186.1  unconventional myosin-VI [Sus scrofa] >gi 75039721 sp Q29122.1 MYO6_PIG RecName: Full=Unconventional myosin-VI; AltName: Full=Unconventional myosin-6 >gi 516155 emb CAA84559.1  unconventional myosin [Sus scrofa]                                           | 1.000 | 0.847 | 0.744 | 0.911 | 0.630 |
| gi 343780950 ref NP_001230488.1  39S ribosomal protein L40, mitochondrial isoform 1 [Sus scrofa]                                                                                                                                                                                           | 1.000 | 0.573 | 0.577 | 0.466 | 0.630 |
| gi 297747302 ref NP_001172115.1  aspartyl aminopeptidase [Sus scrofa]                                                                                                                                                                                                                      | 1.000 | 0.913 | 2.217 | 1.765 | 0.631 |
| gi 311257294 ref XP_003127050.1  PREDICTED: cytochrome b-c1 complex subunit Rieske, mitochondrial-like [Sus scrofa]                                                                                                                                                                        | 1.000 | 0.723 | 0.545 | 0.722 | 0.632 |
| gi 347582660 ref NP_001231584.1  mesencephalic astrocyte-derived neurotrophic factor precursor [Sus scrofa] >gi 350591263 ref XP_003483237.1  PREDICTED: mesencephalic astrocyte-derived neurotrophic factor [Sus scrofa] >gi 306563669 gb ADN03186.1  mesencephalic astrocyte-derived neu | 1.000 | 0.557 | 0.812 | 0.705 | 0.639 |
| gi 350579385 ref XP_001925894.4  PREDICTED: glyoxylate reductase/hydroxypyruvate reductase [Sus scrofa]                                                                                                                                                                                    | 1.000 | 0.895 | 0.493 | 0.623 | 0.640 |
| gi 47523892 ref NP_999584.1  epithelial cell adhesion molecule precursor [Sus                                                                                                                                                                                                              | 1.000 | 0.935 | 0.504 | 0.553 | 0.642 |

|                                                                                                                                                                                                                      |       |       |       |       |       |
|----------------------------------------------------------------------------------------------------------------------------------------------------------------------------------------------------------------------|-------|-------|-------|-------|-------|
| scrofa] >gi 75045149 sp Q75QW1.1 EPCAM_PI<br>G RecName: Full=Epithelial cell adhesion<br>molecule; Short=Ep-CAM; AltName:<br>Full=Tumor-associated calcium signal transducer<br>1; AltName: CD_antigen=CD326; Flags: |       |       |       |       |       |
| gi 350591864 ref XP_001926353.4 <br>PREDICTED: LOW QUALITY PROTEIN:<br>melanotransferrin [Sus scrofa]                                                                                                                | 1.000 | 0.828 | 0.796 | 1.070 | 0.643 |
| gi 335285948 ref XP_003131991.2 <br>PREDICTED: very long-chain specific acyl-CoA<br>dehydrogenase, mitochondrial-like isoform 1<br>[Sus scrofa]                                                                      | 1.000 | 1.314 | 0.725 | 0.661 | 0.646 |
| gi 262072813 dbj BAI47714.1  hydroxysteroid<br>(17-beta) dehydrogenase 12 [Sus scrofa]                                                                                                                               | 1.000 | 0.728 | 0.376 | 0.498 | 0.648 |
| gi 335292368 ref XP_001926489.3 <br>PREDICTED: calcium and integrin-binding<br>protein 1 [Sus scrofa]                                                                                                                | 1.000 | 0.454 | 0.700 | 0.817 | 0.648 |
| gi 350587465 ref XP_003128987.3 <br>PREDICTED: RNA-binding protein 47-like<br>isoform 1 [Sus scrofa]                                                                                                                 | 1.000 | 0.543 | 0.435 | 0.259 | 0.650 |
| gi 311273235 ref XP_003133777.1 <br>PREDICTED: intestinal-type alkaline<br>phosphatase-like isoform 2 [Sus scrofa]                                                                                                   | 1.000 | 0.879 | 1.307 | 2.392 | 0.652 |
| gi 256838109 ref NP_001157984.1  phosphate<br>carrier protein, mitochondrial [Sus<br>scrofa] >gi 255964672 gb ACU44653.1  solute<br>carrier family 25 member 3 [Sus scrofa]                                          | 1.000 | 0.704 | 0.387 | 0.381 | 0.659 |
| gi 350596559 ref XP_003361362.2 <br>PREDICTED: ectonucleotide<br>pyrophosphatase/phosphodiesterase family<br>member 3-like, partial [Sus scrofa]                                                                     | 1.000 | 0.727 | 0.735 | 0.828 | 0.662 |
| gi 350582036 ref XP_003481179.1 <br>PREDICTED: U5 small nuclear<br>ribonucleoprotein 200 kDa helicase [Sus scrofa]                                                                                                   | 1.000 | 0.686 | 0.793 | 0.968 | 0.662 |
| gi 359465576 ref NP_001240753.1  A-kinase<br>anchor protein 9 [Sus scrofa]                                                                                                                                           | 1.000 | 0.772 | 1.137 | 0.982 | 0.663 |
| gi 350276172 ref NP_001231880.1  leucine-rich<br>repeat-containing protein 59 [Sus scrofa]                                                                                                                           | 1.000 | 0.495 | 0.761 | 0.604 | 0.665 |
| gi 335302040 ref XP_001927564.2 <br>PREDICTED: delta-1-pyrroline-5-carboxylate<br>synthase isoform 1 [Sus scrofa]                                                                                                    | 1.000 | 0.834 | 0.466 | 0.373 | 0.665 |
| gi 350589440 ref XP_003130687.3                                                                                                                                                                                      | 1.000 | 0.268 | 0.679 | 0.831 | 0.666 |

|                                                                                                                                                                                                                                                                                            |       |       |       |       |       |
|--------------------------------------------------------------------------------------------------------------------------------------------------------------------------------------------------------------------------------------------------------------------------------------------|-------|-------|-------|-------|-------|
| PREDICTED: Golgi membrane protein 1-like [Sus scrofa]                                                                                                                                                                                                                                      |       |       |       |       |       |
| gi 164359 gb AAA30992.1  apolipoprotein A-I [Sus scrofa]                                                                                                                                                                                                                                   | 1.000 | 1.067 | 0.411 | 0.499 | 0.666 |
| gi 54020966 ref NP_001005726.1  annexin A2 [Sus scrofa] >gi 148876771 sp P19620.4 ANXA2_PIG RecName: Full=Annexin A2; AltName: Full=Annexin II; AltName: Full=Annexin-2; AltName: Full=Calpactin I heavy chain; AltName: Full=Calpactin-1 heavy chain; AltName: Full=Chromobindin-8; AltN  | 1.000 | 0.905 | 0.473 | 0.453 | 0.667 |
| gi 311273928 ref XP_003134106.1  PREDICTED: nucleophosmin-like isoform 2 [Sus scrofa]                                                                                                                                                                                                      | 1.000 | 0.919 | 1.022 | 1.439 | 0.668 |
| gi 305855176 ref NP_001182260.1  cleavage and polyadenylation specificity factor subunit 6 [Sus scrofa] >gi 285818464 gb ADC38905.1  cleavage and polyadenylation specific factor 6 [Sus scrofa]                                                                                           | 1.000 | 0.757 | 1.403 | 1.440 | 0.672 |
| gi 194038359 ref XP_001929028.1  PREDICTED: glutaredoxin-related protein 5, mitochondrial-like [Sus scrofa]                                                                                                                                                                                | 1.000 | 1.169 | 0.703 | 0.919 | 0.677 |
| gi 335297415 ref XP_003358038.1  PREDICTED: 60S ribosomal protein L38-like isoform 2 [Sus scrofa] >gi 311266862 ref XP_003131289.1  PREDICTED: 60S ribosomal protein L38-like isoform 1 [Sus scrofa]                                                                                       | 1.000 | 0.659 | 0.354 | 0.290 | 0.677 |
| gi 350594715 ref XP_001927122.3  PREDICTED: adipocyte plasma membrane-associated protein-like [Sus scrofa]                                                                                                                                                                                 | 1.000 | 0.721 | 0.215 | 0.200 | 0.678 |
| gi 147899784 ref NP_001090887.1  elongation factor 1-alpha 1 [Sus scrofa] >gi 223019599 emb CAX36487.1  eukaryotic translation elongation factor 1 alpha 1 [Sus scrofa] >gi 223019597 emb CAX36486.1  eukaryotic translation elongation factor 1 alpha 1 [Sus scrofa] >gi 110287842 gb ABG | 1.000 | 0.764 | 0.570 | 0.438 | 0.680 |
| gi 346986400 ref NP_001231351.1  kunitz-type protease inhibitor 1 precursor [Sus scrofa]                                                                                                                                                                                                   | 1.000 | 0.573 | 0.736 | 0.762 | 0.681 |
| gi 311259030 ref XP_003127902.1  PREDICTED: small nuclear ribonucleoprotein Sm D1-like [Sus scrofa]                                                                                                                                                                                        | 1.000 | 1.410 | 1.528 | 1.301 | 0.682 |

|                                                                                                                                                                                                                                                                                        |       |       |       |       |       |
|----------------------------------------------------------------------------------------------------------------------------------------------------------------------------------------------------------------------------------------------------------------------------------------|-------|-------|-------|-------|-------|
| gi 37962872 gb AAR05785.1  cytochrome c oxidase subunit 2 [Sus scrofa] >gi 162423271 gb ABX89412.1  cytochrome c oxidase subunit 2 [Sus scrofa]                                                                                                                                        | 1.000 | 0.868 | 0.423 | 0.338 | 0.684 |
| gi 335310669 ref XP_003362140.1  PREDICTED: hypothetical protein LOC100622909 [Sus scrofa]                                                                                                                                                                                             | 1.000 | 0.605 | 0.902 | 0.685 | 0.684 |
| gi 349501107 ref NP_001231795.1  ribosomal protein, large, P2 [Sus scrofa]                                                                                                                                                                                                             | 1.000 | 0.630 | 1.484 | 1.372 | 0.685 |
| gi 47523888 ref NP_999583.1  ADP/ATP translocase 3 [Sus scrofa] >gi 52000613 sp Q6QRN9.3 ADT3_PIG RecName: Full=ADP/ATP translocase 3; AltName: Full=ADP,ATP carrier protein 3; AltName: Full=Adenine nucleotide translocator 3; Short=ANT 3; AltName: Full=Solute carrier family 25 m | 1.000 | 0.649 | 0.471 | 0.325 | 0.687 |
| gi 350594057 ref XP_003359743.2  PREDICTED: leucine-rich repeat flightless-interacting protein 2-like [Sus scrofa]                                                                                                                                                                     | 1.000 | 0.725 | 0.781 | 1.048 | 0.688 |
| gi 148222268 ref NP_001090952.1  tropomyosin alpha-1 chain [Sus scrofa] >gi 158931149 sp P42639.2 TPM1_PIG RecName: Full=Tropomyosin alpha-1 chain; AltName: Full=Alpha-tropomyosin; AltName: Full=Tropomyosin-1 >gi 117661180 gb ABK55659.1  TPM1 [Sus scrofa]                        | 1.000 | 0.641 | 1.115 | 1.002 | 0.688 |
| gi 290463427 sp Q0QF01.2 DHSA_PIG RecName: Full=Succinate dehydrogenase [ubiquinone] flavoprotein subunit, mitochondrial; AltName: Full=Flavoprotein subunit of complex II; Short=Fp; Flags: Precursor                                                                                 | 1.000 | 0.678 | 0.605 | 0.674 | 0.695 |
| gi 311268489 ref XP_003132080.1  PREDICTED: fatty aldehyde dehydrogenase-like [Sus scrofa]                                                                                                                                                                                             | 1.000 | 0.804 | 0.424 | 0.401 | 0.695 |
| gi 311251336 ref XP_003124563.1  PREDICTED: elongation factor Tu, mitochondrial-like [Sus scrofa]                                                                                                                                                                                      | 1.000 | 0.973 | 0.501 | 0.508 | 0.696 |
| gi 164302 gb AAA30983.1  alpha-1 acid glycoprotein, partial [Sus scrofa]                                                                                                                                                                                                               | 1.000 | 0.263 | 0.696 | 0.494 | 0.699 |
| gi 54039371 sp P62272.3 RS18_PIG RecName: Full=40S ribosomal protein S18 >gi 47522714 ref NP_999105.1  40S                                                                                                                                                                             | 1.000 | 0.629 | 0.226 | 0.178 | 0.700 |

|                                                                                                                                                                                                                                                                                        |       |       |       |       |       |
|----------------------------------------------------------------------------------------------------------------------------------------------------------------------------------------------------------------------------------------------------------------------------------------|-------|-------|-------|-------|-------|
| ribosomal protein S18 [Sus scrofa] >gi 1841304 dbj BAA19211.1  ribosomal protein [Sus scrofa]                                                                                                                                                                                          |       |       |       |       |       |
| gi 350593231 ref XP_003359478.2  PREDICTED: lactase-phlorizin hydrolase-like [Sus scrofa]                                                                                                                                                                                              | 1.000 | 0.691 | 0.999 | 0.733 | 0.700 |
| gi 345100481 pdb 1C9P A Chain A, Complex Of Bdellastasin With Porcine Trypsin >gi 3318722 pdb 1AN1 E Chain E, Leech-Derived Tryptase InhibitorTRYPSIN COMPLEX                                                                                                                          | 1.000 | 0.612 | 0.894 | 0.765 | 0.701 |
| gi 156120140 ref NP_001095287.1  helicase SKI2W [Sus scrofa] >gi 148724903 emb CAN87691.1  superkiller viralicidic activity 2-like (S. cerevisiae) [Sus scrofa]                                                                                                                        | 1.000 | 0.943 | 1.061 | 1.130 | 0.702 |
| gi 335304027 ref XP_003134070.2  PREDICTED: 28S ribosomal protein S36, mitochondrial-like [Sus scrofa]                                                                                                                                                                                 | 1.000 | 0.469 | 0.658 | 0.771 | 0.704 |
| gi 335288150 ref XP_003126347.2  PREDICTED: prolow-density lipoprotein receptor-related protein 1-like [Sus scrofa]                                                                                                                                                                    | 1.000 | 0.776 | 0.558 | 0.530 | 0.707 |
| gi 47523726 ref NP_999498.1  dolichyl-diphosphooligosaccharide--protein glycosyltransferase subunit 1 precursor [Sus scrofa] >gi 75056164 sp Q9GMB0.1 RPN1_PIG RecName: Full=Dolichyl-diphosphooligosaccharide--protein glycosyltransferase subunit 1; AltName: Full=Dolichyl-diphosph | 1.000 | 0.625 | 0.627 | 0.547 | 0.709 |
| gi 78172717 gb ABB29449.1  transporter associated with antigen processing 1 [Sus scrofa]                                                                                                                                                                                               | 1.000 | 0.541 | 0.382 | 0.447 | 0.711 |
| gi 164318 gb AAA30988.1  albumin, partial [Sus scrofa]                                                                                                                                                                                                                                 | 1.000 | 1.129 | 0.611 | 0.569 | 0.712 |
| gi 346644799 ref NP_001231157.1  thymopoietin [Sus scrofa]                                                                                                                                                                                                                             | 1.000 | 0.723 | 0.984 | 0.854 | 0.716 |
| gi 335299041 ref XP_001926664.3  PREDICTED: cytochrome b-c1 complex subunit 1, mitochondrial [Sus scrofa]                                                                                                                                                                              | 1.000 | 0.764 | 0.572 | 0.812 | 0.720 |
| gi 350589278 ref XP_003130571.3  PREDICTED: melanoma inhibitory activity protein 3-like, partial [Sus scrofa]                                                                                                                                                                          | 1.000 | 0.752 | 1.073 | 0.757 | 0.720 |
| gi 164382 gb AAA31002.1  Na+, K+-ATPase                                                                                                                                                                                                                                                | 1.000 | 0.797 | 0.422 | 0.473 | 0.725 |

|                                                                                                                                                                                                                                                                                       |       |       |       |       |       |
|---------------------------------------------------------------------------------------------------------------------------------------------------------------------------------------------------------------------------------------------------------------------------------------|-------|-------|-------|-------|-------|
| alpha-subunit precursor [Sus scrofa]                                                                                                                                                                                                                                                  |       |       |       |       |       |
| gi 347300243 ref NP_001231430.1  glutamate dehydrogenase 1, mitochondrial [Sus scrofa]                                                                                                                                                                                                | 1.000 | 0.826 | 0.563 | 0.527 | 0.727 |
| gi 47522750 ref NP_999125.1  voltage-dependent anion-selective channel protein 1 [Sus scrofa] >gi 75050406 sp Q9MZ16.3 VDAC1_PIG RecName: Full=Voltage-dependent anion-selective channel protein 1; Short=VDAC-1 >gi 8745552 gb AAF78963.1 AF268461_1 voltage-dependent anion channel | 1.000 | 0.661 | 0.450 | 0.434 | 0.729 |
| gi 8569334 pdb 1EIO A Chain A, Ileal Lipid Binding Protein In Complex With Glycocholate                                                                                                                                                                                               | 1.000 | 1.497 | 1.823 | 0.959 | 0.734 |
| gi 448581 prf 1917268B pyruvate dehydrogenase:SUBUNIT=beta                                                                                                                                                                                                                            | 1.000 | 1.030 | 0.518 | 0.699 | 0.734 |
| gi 350584479 ref XP_003126643.3  PREDICTED: bcl-2-like protein 13 [Sus scrofa]                                                                                                                                                                                                        | 1.000 | 0.678 | 1.003 | 0.721 | 0.739 |
| gi 347300207 ref NP_001231417.1  nucleobindin-1 precursor [Sus scrofa]                                                                                                                                                                                                                | 1.000 | 0.672 | 1.095 | 1.007 | 0.739 |
| gi 343072 gb AAA32030.1  ATPase 8, partial (mitochondrion) [Sus scrofa]                                                                                                                                                                                                               | 1.000 | 0.683 | 0.285 | 0.431 | 0.745 |
| gi 1346670 sp P04175.2 NCPR_PIG RecName: Full=NADPH--cytochrome P450 reductase; Short=CPR; Short=P450R                                                                                                                                                                                | 1.000 | 0.722 | 0.432 | 0.709 | 0.752 |
| gi 311270597 ref XP_003132922.1  PREDICTED: 26S proteasome non-ATPase regulatory subunit 9-like [Sus scrofa]                                                                                                                                                                          | 1.000 | 0.599 | 1.217 | 1.425 | 0.755 |
| gi 178056556 ref NP_001116620.1  probable aminopeptidase NPEPL1 [Sus scrofa] >gi 147223400 emb CAN13197.1  aminopeptidase-like 1 [Sus scrofa]                                                                                                                                         | 1.000 | 1.378 | 2.150 | 2.596 | 0.755 |
| gi 12231040 sp Q29048.2 VATA_PIG RecName: Full=V-type proton ATPase catalytic subunit A; Short=V-ATPase subunit A; AltName: Full=V-ATPase 69 kDa subunit; AltName: Full=Vacuolar proton pump subunit alpha                                                                            | 1.000 | 0.868 | 0.558 | 0.642 | 0.755 |
| gi 311274849 ref XP_001925742.2  PREDICTED: regulation of nuclear pre-mRNA domain-containing protein 1B [Sus scrofa]                                                                                                                                                                  | 1.000 | 0.672 | 1.313 | 0.928 | 0.755 |
| gi 113205886 ref NP_001038075.1  nucleoside diphosphate kinase B [Sus scrofa] >gi 115311824 sp Q2EN76.1 NDKB_PIG RecName: Full=Nucleoside diphosphate kinase                                                                                                                          | 1.000 | 0.829 | 1.823 | 1.107 | 0.757 |

|                                                                                                                                                                                                                                                                                                          |       |       |       |       |       |
|----------------------------------------------------------------------------------------------------------------------------------------------------------------------------------------------------------------------------------------------------------------------------------------------------------|-------|-------|-------|-------|-------|
| B; Short=NDK B; Short=NDP kinase B;<br>AltName: Full=Histidine protein kinase<br>NDKB >gi 87047646 gb ABD18456.1  nm23-H2<br>[Sus scro                                                                                                                                                                   |       |       |       |       |       |
| gi 350580184 ref XP_003353965.2 <br>PREDICTED: reticulocalbin-1-like isoform 2<br>[Sus scrofa]                                                                                                                                                                                                           | 1.000 | 0.631 | 0.986 | 1.263 | 0.758 |
| gi 350596353 ref XP_003361080.2 <br>PREDICTED: gamma-soluble NSF attachment<br>protein-like [Sus scrofa]                                                                                                                                                                                                 | 1.000 | 0.767 | 0.636 | 0.846 | 0.758 |
| gi 342349319 ref NP_001230139.1  calnexin<br>precursor [Sus scrofa]                                                                                                                                                                                                                                      | 1.000 | 0.685 | 0.549 | 0.700 | 0.759 |
| gi 194036296 ref XP_001926524.1 <br>PREDICTED: splicing factor 3B subunit 4 [Sus<br>scrofa]                                                                                                                                                                                                              | 1.000 | 0.862 | 1.231 | 1.161 | 0.760 |
| gi 350580651 ref XP_003480867.1 <br>PREDICTED: scaffold attachment factor B1-like<br>isoform 2 [Sus scrofa]                                                                                                                                                                                              | 1.000 | 0.687 | 1.076 | 0.762 | 0.763 |
| gi 335278800 ref XP_003121142.2 <br>PREDICTED: afadin [Sus scrofa]                                                                                                                                                                                                                                       | 1.000 | 0.568 | 1.225 | 1.062 | 0.765 |
| gi 350582773 ref XP_003481353.1 <br>PREDICTED: 40S ribosomal protein S7-like<br>isoform 2 [Sus<br>scrofa] >gi 350582771 ref XP_003481352.1 <br>PREDICTED: 40S ribosomal protein S7-like<br>isoform 1 [Sus scrofa]                                                                                        | 1.000 | 0.624 | 0.404 | 0.255 | 0.765 |
| gi 346421419 ref NP_001231084.1  lysosome<br>membrane protein 2 precursor [Sus scrofa]                                                                                                                                                                                                                   | 1.000 | 0.696 | 0.520 | 0.332 | 0.768 |
| gi 335285324 ref XP_003354827.1 <br>PREDICTED: prenylcysteine oxidase-like [Sus<br>scrofa]                                                                                                                                                                                                               | 1.000 | 1.016 | 0.403 | 0.147 | 0.770 |
| gi 47522680 ref NP_999069.1  neutral<br>alpha-glucosidase AB precursor [Sus<br>scrofa] >gi 54037147 sp P79403.1 GANAB_PIG<br>RecName: Full=Neutral alpha-glucosidase AB;<br>AltName: Full=Alpha-glucosidase 2; AltName:<br>Full=Glucosidase II subunit alpha; Flags:<br>Precursor >gi 1890664 gb AAB4975 | 1.000 | 0.917 | 0.548 | 0.547 | 0.771 |
| gi 304365428 ref NP_001182041.1  protein<br>disulfide-isomerase A3 precursor [Sus<br>scrofa] >gi 301016769 dbj BAJ11757.1  glucose<br>regulated protein 58 [Sus scrofa]                                                                                                                                  | 1.000 | 0.492 | 1.192 | 1.152 | 0.772 |
| gi 1710093 sp P50121.2 RET2_PIG RecName:                                                                                                                                                                                                                                                                 | 1.000 | 1.386 | 0.766 | 0.800 | 0.777 |



|                                                                                                                                                                                                                                                                                                                 |       |       |       |       |       |
|-----------------------------------------------------------------------------------------------------------------------------------------------------------------------------------------------------------------------------------------------------------------------------------------------------------------|-------|-------|-------|-------|-------|
| Full=Retinol-binding protein 2; AltName:<br>Full=Cellular retinol-binding protein II;<br>Short=CRBP-II >gi 55741711 ref NP_999616.1 <br>retinol-binding protein 2 [Sus<br>scrofa] >gi 455523 emb CAA54729.1  cellular<br>retinol binding protein II [Sus scrofa                                                 |       |       |       |       |       |
| gi 305855170 ref NP_001182250.1 <br>long-chain-fatty-acid--CoA ligase 5 [Sus<br>scrofa] >gi 285818418 gb ADC38882.1 <br>acyl-CoA synthetase long-chain family member<br>5 [Sus scrofa]                                                                                                                          | 1.000 | 0.820 | 0.530 | 0.574 | 0.782 |
| gi 178056623 ref NP_001116685.1 <br>vesicle-associated membrane protein-associated<br>protein B [Sus<br>scrofa] >gi 160210890 sp A5GFS8.1 VAPB_PIG<br>RecName: Full=Vesicle-associated membrane<br>protein-associated protein B; Short=VAMP-B;<br>Short=VAMP-associated protein B;<br>Short=VAP-B >gi 147223393 | 1.000 | 0.473 | 0.849 | 0.623 | 0.782 |
| gi 47522846 ref NP_999175.1  ATP-binding<br>cassette sub-family G member 2 [Sus<br>scrofa] >gi 68051987 sp Q8MIB3.1 ABCG2_PIG<br>RecName: Full=ATP-binding cassette sub-family<br>G member 2; AltName: Full=Brain multidrug<br>resistance protein; AltName:<br>CD_antigen=CD338 >gi 21530795 emb CAD127<br>8    | 1.000 | 1.247 | 0.674 | 0.582 | 0.785 |
| gi 1921 emb CAA33169.1  unnamed protein<br>product [Sus scrofa]                                                                                                                                                                                                                                                 | 1.000 | 0.735 | 0.558 | 0.573 | 0.786 |
| gi 47522608 ref NP_999106.1 <br>dolichyl-diphosphooligosaccharide--protein<br>glycosyltransferase subunit 2 precursor [Sus<br>scrofa] >gi 75056105 sp Q9GL01.1 RPN2_PIG<br>RecName:<br>Full=Dolichyl-diphosphooligosaccharide--protein<br>glycosyltransferase subunit 2; AltName:<br>Full=Dolichyl-diphosph     | 1.000 | 0.966 | 0.550 | 0.412 | 0.788 |
| gi 335293186 ref XP_003356895.1 <br>PREDICTED: grpE protein homolog 1,<br>mitochondrial-like isoform 1 [Sus scrofa]                                                                                                                                                                                             | 1.000 | 0.674 | 0.743 | 0.608 | 0.791 |
| gi 311267276 ref XP_003131485.1 <br>PREDICTED: keratin, type I cytoskeletal 19-like<br>[Sus scrofa]                                                                                                                                                                                                             | 1.000 | 0.627 | 0.634 | 0.765 | 0.792 |

|                                                                                                                                                                                                                                                                                             |       |       |       |       |       |
|---------------------------------------------------------------------------------------------------------------------------------------------------------------------------------------------------------------------------------------------------------------------------------------------|-------|-------|-------|-------|-------|
| gi 230506 pdb 2FBP A Chain A, Structure Refinement Of Fructose-1,6-Bisphosphatase And Its Fructose 2,6-Bisphosphate Complex At 2.8 Angstroms Resolution >gi 230507 pdb 2FBP B Chain B, Structure Refinement Of Fructose-1,6-Bisphosphatase And Its Fructose 2,6-Bisphosphate C              | 1.000 | 1.622 | 1.109 | 0.814 | 0.793 |
| gi 335281686 ref XP_003353872.1  PREDICTED: UBX domain-containing protein 1-like [Sus scrofa]                                                                                                                                                                                               | 1.000 | 0.843 | 1.119 | 0.973 | 0.796 |
| gi 340007402 ref NP_001229989.1  RAB10, member RAS oncogene family [Sus scrofa]                                                                                                                                                                                                             | 1.000 | 0.916 | 0.388 | 0.456 | 0.797 |
| gi 343790888 ref NP_001230502.1  uncharacterized protein LOC100627352 [Sus scrofa]                                                                                                                                                                                                          | 1.000 | 0.852 | 0.333 | 0.465 | 0.797 |
| gi 194037097 ref XP_001927840.1  PREDICTED: carbonic anhydrase 2 [Sus scrofa]                                                                                                                                                                                                               | 1.000 | 0.798 | 1.380 | 1.495 | 0.798 |
| gi 297591975 ref NP_001172071.1  ATP synthase subunit alpha, mitochondrial [Sus scrofa] >gi 187370717 gb ACD02421.1  cardiac muscle ATP synthase H+ transporting mitochondrial F1 complex alpha subunit 1 [Sus scrofa]                                                                      | 1.000 | 0.768 | 0.706 | 0.723 | 0.799 |
| gi 350594669 ref XP_001926037.4  PREDICTED: ribosome-binding protein 1 [Sus scrofa]                                                                                                                                                                                                         | 1.000 | 0.571 | 1.008 | 0.992 | 0.800 |
| gi 194042439 ref XP_001928012.1  PREDICTED: ATPase family AAA domain-containing protein 1 isoform 1 [Sus scrofa]                                                                                                                                                                            | 1.000 | 0.481 | 1.189 | 1.064 | 0.800 |
| gi 346644830 ref NP_001231167.1  sulfide:quinone oxidoreductase, mitochondrial [Sus scrofa]                                                                                                                                                                                                 | 1.000 | 0.889 | 0.519 | 0.467 | 0.803 |
| gi 335309807 ref XP_003361778.1  PREDICTED: delta-aminolevulinic acid dehydratase-like, partial [Sus scrofa]                                                                                                                                                                                | 1.000 | 0.853 | 1.284 | 1.316 | 0.803 |
| gi 148747594 ref NP_001092068.1  60S acidic ribosomal protein P0 [Sus scrofa] >gi 182705234 sp Q29214.2 RLA0_PIG RecName: Full=60S acidic ribosomal protein P0; AltName: Full=60S ribosomal protein L10E >gi 83854099 gb ABC47963.1  ribosomal phosphoprotein large PO subunit [Sus scrofa] | 1.000 | 0.785 | 0.612 | 0.651 | 0.807 |

|                                                                                                                                                                                                                                                                                        |       |       |       |       |       |
|----------------------------------------------------------------------------------------------------------------------------------------------------------------------------------------------------------------------------------------------------------------------------------------|-------|-------|-------|-------|-------|
| gi 1236646 gb AAC48775.1  ch4 and secrete domains of swine IgM [Sus scrofa]                                                                                                                                                                                                            | 1.000 | 0.779 | 0.684 | 0.478 | 0.807 |
| gi 311277261 ref XP_003135572.1  PREDICTED: 55 kDa erythrocyte membrane protein-like isoform 1 [Sus scrofa]                                                                                                                                                                            | 1.000 | 0.801 | 0.558 | 0.535 | 0.811 |
| gi 47522948 ref NP_999231.1  D-amino-acid oxidase [Sus scrofa] >gi 129305 sp P00371.2 OXDA_PIG RecName: Full=D-amino-acid oxidase; Short=DAAO; Short=DAMOX; Short=DAO >gi 164306 gb AAA30985.1  D-amino acid oxidase [Sus scrofa] >gi 48425898 pdb 1VE9 A Chain A, Porcine Kidney D-Am | 1.000 | 1.109 | 0.677 | 0.555 | 0.816 |
| gi 335299628 ref XP_001926139.3  PREDICTED: coatomer subunit beta~ [Sus scrofa]                                                                                                                                                                                                        | 1.000 | 0.808 | 0.654 | 0.856 | 0.817 |
| gi 311247240 ref XP_003122553.1  PREDICTED: splicing factor 3B subunit 2 [Sus scrofa]                                                                                                                                                                                                  | 1.000 | 0.716 | 1.012 | 0.897 | 0.818 |
| gi 194037681 ref XP_001926390.1  PREDICTED: early endosome antigen 1 [Sus scrofa]                                                                                                                                                                                                      | 1.000 | 0.749 | 1.226 | 1.334 | 0.818 |
| gi 335310208 ref XP_003361930.1  PREDICTED: NADH dehydrogenase [ubiquinone] 1 beta subcomplex subunit 4-like [Sus scrofa]                                                                                                                                                              | 1.000 | 1.201 | 0.436 | 0.449 | 0.822 |
| gi 311254645 ref XP_003125912.1  PREDICTED: EPS8-like 3 [Sus scrofa]                                                                                                                                                                                                                   | 1.000 | 0.870 | 0.538 | 0.696 | 0.824 |
| gi 194042318 ref XP_001928917.1  PREDICTED: putative hexokinase HKDC1 [Sus scrofa]                                                                                                                                                                                                     | 1.000 | 0.716 | 0.557 | 0.679 | 0.825 |
| gi 335283403 ref XP_003123930.2  PREDICTED: lamin-B1 [Sus scrofa]                                                                                                                                                                                                                      | 1.000 | 0.698 | 0.956 | 0.966 | 0.827 |
| gi 343887442 ref NP_001230623.1  heterogeneous nuclear ribonucleoprotein C (C1/C2) 2 [Sus scrofa]                                                                                                                                                                                      | 1.000 | 0.738 | 0.645 | 0.614 | 0.827 |
| gi 47523672 ref NP_999468.1  2~-5~-oligoadenylate synthase 1 [Sus scrofa] >gi 6226834 sp Q29599.3 OAS1_PIG RecName: Full=2~-5~-oligoadenylate synthase 1; Short=(2-5~)oligo(A) synthase 1; Short=2-5A synthase 1; AltName: Full=p42                                                    | 1.000 | 0.885 | 0.462 | 0.342 | 0.831 |

|                                                                                                                                                                                                                                                                                                                  |       |       |       |       |       |
|------------------------------------------------------------------------------------------------------------------------------------------------------------------------------------------------------------------------------------------------------------------------------------------------------------------|-------|-------|-------|-------|-------|
| OAS >gi 3451331 emb CAA12397.1  2~-5~<br>oligoadenyla                                                                                                                                                                                                                                                            |       |       |       |       |       |
| gi 353819 prf 1106188C cytochrome b5                                                                                                                                                                                                                                                                             | 1.000 | 0.588 | 0.840 | 0.666 | 0.833 |
| gi 350587379 ref XP_003482398.1 <br>PREDICTED: putative aminopeptidase<br>C13A11.05-like [Sus scrofa]                                                                                                                                                                                                            | 1.000 | 2.105 | 2.722 | 3.623 | 0.835 |
| gi 194042189 ref XP_001924213.1 <br>PREDICTED: annexin A11 [Sus scrofa]                                                                                                                                                                                                                                          | 1.000 | 1.218 | 0.642 | 0.780 | 0.835 |
| gi 311247118 ref XP_003122486.1 <br>PREDICTED: NADH dehydrogenase<br>[ubiquinone] flavoprotein 1, mitochondrial-like<br>isoform 1 [Sus scrofa]                                                                                                                                                                   | 1.000 | 1.053 | 0.587 | 0.656 | 0.836 |
| gi 387912908 sp P28491.3 CALR_PIG<br>RecName: Full=Calreticulin; AltName:<br>Full=CRP55; AltName: Full=Calregulin;<br>AltName: Full=Endoplasmic reticulum resident<br>protein 60; Short=ERp60; AltName:<br>Full=HACBP; Flags:<br>Precursor >gi 291622246 ref NP_001167604.1 <br>calreticulin precursor [Sus scro | 1.000 | 0.910 | 0.589 | 0.581 | 0.836 |
| gi 183228163 gb ACC59785.1  PRP19/PSO4<br>pre-mRNA processing factor 19-like protien [Sus<br>scrofa]                                                                                                                                                                                                             | 1.000 | 1.040 | 1.003 | 0.467 | 0.837 |
| gi 350588303 ref XP_003129732.3 <br>PREDICTED: serine/threonine-protein kinase<br>PAK 1-like [Sus scrofa]                                                                                                                                                                                                        | 1.000 | 1.086 | 0.799 | 0.761 | 0.840 |
| gi 335306763 ref XP_003360560.1 <br>PREDICTED: ubiquitin-like protein 4A-like<br>isoform 1 [Sus scrofa]                                                                                                                                                                                                          | 1.000 | 0.800 | 0.778 | 0.894 | 0.843 |
| gi 311269853 ref XP_003132661.1 <br>PREDICTED: choline-phosphate<br>cytidyltransferase A [Sus scrofa]                                                                                                                                                                                                            | 1.000 | 0.689 | 0.563 | 0.584 | 0.844 |
| gi 37934198 gb AAP68768.1  2,4-dienoyl-CoA<br>reductase [Sus scrofa]                                                                                                                                                                                                                                             | 1.000 | 1.330 | 0.905 | 0.922 | 0.844 |
| gi 311259162 ref XP_003127965.1 <br>PREDICTED: far upstream element-binding<br>protein 1 [Sus scrofa]                                                                                                                                                                                                            | 1.000 | 0.590 | 0.988 | 0.965 | 0.846 |
| gi 194039403 ref XP_001929632.1 <br>PREDICTED: CDC5 cell division cycle 5-like<br>[Sus scrofa]                                                                                                                                                                                                                   | 1.000 | 0.541 | 0.668 | 0.720 | 0.847 |
| gi 1165145 emb CAA64477.1  annexin I [Sus<br>scrofa]                                                                                                                                                                                                                                                             | 1.000 | 0.423 | 0.578 | 0.912 | 0.848 |

|                                                                                                                                                                                                    |       |       |       |       |       |
|----------------------------------------------------------------------------------------------------------------------------------------------------------------------------------------------------|-------|-------|-------|-------|-------|
| gi 349585085 ref NP_001231804.1  RAB11B, member RAS oncogene family [Sus scrofa]                                                                                                                   | 1.000 | 1.031 | 0.664 | 0.520 | 0.848 |
| gi 311260817 ref XP_001925607.2  PREDICTED: protein PML isoform 1 [Sus scrofa]                                                                                                                     | 1.000 | 0.605 | 0.668 | 0.609 | 0.849 |
| gi 350586335 ref XP_003356548.2  PREDICTED: nuclease-sensitive element-binding protein 1-like [Sus scrofa]                                                                                         | 1.000 | 0.357 | 1.959 | 0.998 | 0.852 |
| gi 158514030 sp A1XQU3.1 RL14_PIG RecName: Full=60S ribosomal protein L14 >gi 148237282 ref NP_001090947.1  60S ribosomal protein L14 [Sus scrofa] >gi 117661006 gb ABK55649.1  RPL14 [Sus scrofa] | 1.000 | 1.034 | 0.626 | 0.479 | 0.855 |
| gi 311273371 ref XP_003133833.1  PREDICTED: NADH dehydrogenase [ubiquinone] 1 alpha subcomplex subunit 10, mitochondrial-like [Sus scrofa]                                                         | 1.000 | 0.942 | 0.553 | 0.566 | 0.856 |
| gi 146741296 dbj BAF62303.1  keratin 1 [Sus scrofa]                                                                                                                                                | 1.000 | 0.933 | 1.375 | 0.846 | 0.856 |
| gi 345090993 ref NP_001230731.1  RAB8A, member RAS oncogene family [Sus scrofa]                                                                                                                    | 1.000 | 0.701 | 0.514 | 0.564 | 0.856 |
| gi 343887420 ref NP_001230609.1  transcription elongation factor A protein 1 [Sus scrofa]                                                                                                          | 1.000 | 0.935 | 1.433 | 1.330 | 0.857 |
| gi 311275164 ref XP_003134601.1  PREDICTED: amiloride-sensitive amine oxidase [copper-containing] [Sus scrofa]                                                                                     | 1.000 | 0.807 | 0.699 | 0.984 | 0.858 |
| gi 171986635 gb ACB59309.1  intelectin 2 [Sus scrofa]                                                                                                                                              | 1.000 | 1.352 | 0.631 | 0.358 | 0.858 |
| gi 311276040 ref XP_003135024.1  PREDICTED: LOW QUALITY PROTEIN: acyl-coenzyme A thioesterase 9, mitochondrial-like [Sus scrofa]                                                                   | 1.000 | 1.339 | 0.598 | 0.958 | 0.858 |
| gi 350584106 ref XP_003481667.1  PREDICTED: SWI/SNF complex subunit SMARCC2 [Sus scrofa]                                                                                                           | 1.000 | 0.755 | 0.898 | 0.717 | 0.863 |
| gi 132566481 gb ABO34136.1  bactericidal permeability increasing protein [Sus scrofa]                                                                                                              | 1.000 | 1.007 | 0.321 | 0.341 | 0.863 |
| gi 311267326 ref XP_003131510.1  PREDICTED: keratin, type I cytoskeletal 20-like [Sus scrofa]                                                                                                      | 1.000 | 0.640 | 0.647 | 0.745 | 0.864 |
| gi 350581449 ref XP_003481037.1                                                                                                                                                                    | 1.000 | 1.102 | 0.709 | 0.749 | 0.867 |

|                                                                                                                                      |       |       |       |       |       |
|--------------------------------------------------------------------------------------------------------------------------------------|-------|-------|-------|-------|-------|
| PREDICTED: guanine nucleotide-binding protein G(I)/G(S)/G(T) subunit beta-2-like [Sus scrofa] >gi 311251041 ref XP_003124417.1       |       |       |       |       |       |
| PREDICTED: guanine nucleotide-binding protein G(I)/G(S)/G(T) subunit beta-2-like isoform 2 [Sus scrofa]                              |       |       |       |       |       |
| gi 350539577 ref NP_001233167.1  coatomer subunit gamma-2 [Sus scrofa] >gi 301087607 gb ADK56184.1                                   | 1.000 | 1.059 | 0.472 | 0.381 | 0.867 |
| coatomer protein complex subunit gamma 2 [Sus scrofa]                                                                                |       |       |       |       |       |
| gi 238018148 ref NP_001153899.1                                                                                                      |       |       |       |       |       |
| ADP-ribosylation factor 1 [Sus scrofa] >gi 212725657 gb ACJ38117.1                                                                   | 1.000 | 0.779 | 0.435 | 0.407 | 0.868 |
| ADP-ribosylation factor 1 [Sus scrofa] >gi 237638742 gb ACR07973.1                                                                   |       |       |       |       |       |
| ADP-ribosylation factor 1 [Sus scrofa]                                                                                               |       |       |       |       |       |
| gi 345441771 ref NP_001230857.1  aldolase C, fructose-bisphosphate [Sus scrofa]                                                      | 1.000 | 1.123 | 0.698 | 1.148 | 0.868 |
| gi 350595677 ref XP_003360362.2                                                                                                      |       |       |       |       |       |
| PREDICTED: GRIP1-associated protein 1 [Sus scrofa]                                                                                   | 1.000 | 0.784 | 1.938 | 1.963 | 0.870 |
| gi 335296241 ref XP_003357722.1                                                                                                      |       |       |       |       |       |
| PREDICTED: ladinin-1-like [Sus scrofa]                                                                                               | 1.000 | 0.587 | 0.680 | 0.710 | 0.870 |
| gi 350591788 ref XP_003358782.2                                                                                                      |       |       |       |       |       |
| PREDICTED: hypothetical protein LOC448846 [Sus scrofa]                                                                               | 1.000 | 1.439 | 0.714 | 0.869 | 0.874 |
| gi 335310107 ref XP_003361890.1                                                                                                      |       |       |       |       |       |
| PREDICTED: non-POU domain-containing octamer-binding protein [Sus scrofa]                                                            | 1.000 | 1.266 | 0.594 | 0.636 | 0.877 |
| gi 194043083 ref XP_001928729.1                                                                                                      |       |       |       |       |       |
| PREDICTED: malectin-like [Sus scrofa]                                                                                                | 1.000 | 0.792 | 0.388 | 0.530 | 0.878 |
| gi 194043861 ref XP_001928233.1                                                                                                      |       |       |       |       |       |
| PREDICTED: tubulin alpha-1D chain [Sus scrofa]                                                                                       | 1.000 | 0.839 | 0.202 | 0.171 | 0.878 |
| gi 70986480 gb AAZ16514.1  hepatic nuclear factor 1 [Sus scrofa]                                                                     | 1.000 | 0.768 | 1.128 | 1.780 | 0.882 |
| gi 640352 pdb 3MDE A Chain A, Crystal Structures Of Medium Chain Acyl-Coa Dehydrogenase From Pig Liver Mitochondria With And Without |       |       |       |       |       |
| Substrate >gi 640350 pdb 3MDD A Chain A, Crystal Structures Of Medium Chain Acyl-Coa                                                 | 1.000 | 1.391 | 0.684 | 0.685 | 0.883 |

|                                                                                                                                                                                                                                                                                                                 |       |       |       |       |       |
|-----------------------------------------------------------------------------------------------------------------------------------------------------------------------------------------------------------------------------------------------------------------------------------------------------------------|-------|-------|-------|-------|-------|
| Dehydrogenase From Pig Liver Mitochondria With And W                                                                                                                                                                                                                                                            |       |       |       |       |       |
| gi 311265664 ref XP_003130763.1 <br>PREDICTED: LOW QUALITY PROTEIN:<br>kinesin-1 heavy chain [Sus scrofa]                                                                                                                                                                                                       | 1.000 | 0.823 | 0.710 | 1.111 | 0.887 |
| gi 85542092 sp Q2YGT9.3 RL6_PIG RecName:<br>Full=60S ribosomal protein<br>L6 >gi 113205608 ref NP_001038007.1  60S<br>ribosomal protein L6 [Sus<br>scrofa] >gi 56384243 gb AAV85770.1  ribosomal<br>protein L6 [Sus scrofa]                                                                                     | 1.000 | 0.806 | 0.295 | 0.432 | 0.890 |
| gi 350595461 ref XP_003134939.3 <br>PREDICTED: LOW QUALITY PROTEIN:<br>2-oxoglutarate dehydrogenase,<br>mitochondrial-like [Sus scrofa]                                                                                                                                                                         | 1.000 | 0.912 | 0.602 | 0.409 | 0.891 |
| gi 298104076 ref NP_001177104.1  enoyl-CoA<br>hydratase, mitochondrial [Sus scrofa]                                                                                                                                                                                                                             | 1.000 | 1.176 | 0.473 | 0.430 | 0.891 |
| gi 335289671 ref XP_003355951.1 <br>PREDICTED: transcription elongation factor<br>SPT5 isoform 3 [Sus<br>scrofa] >gi 335289667 ref XP_003355949.1 <br>PREDICTED: transcription elongation factor<br>SPT5 isoform 1 [Sus<br>scrofa] >gi 335289669 ref XP_003355950.1 <br>PREDICTED: transcription elongation fac | 1.000 | 0.921 | 1.108 | 1.490 | 0.892 |
| gi 194036302 ref XP_001926704.1 <br>PREDICTED: histone H2A type 2-B-like [Sus<br>scrofa]                                                                                                                                                                                                                        | 1.000 | 0.779 | 1.057 | 1.179 | 0.893 |
| gi 335309199 ref XP_003361534.1 <br>PREDICTED: AP-1 complex subunit<br>sigma-1A-like [Sus scrofa]                                                                                                                                                                                                               | 1.000 | 0.824 | 0.539 | 0.476 | 0.893 |
| gi 47523628 ref NP_999442.1  aminopeptidase N<br>[Sus<br>scrofa] >gi 1703286 sp P15145.3 AMPN_PIG<br>RecName: Full=Aminopeptidase N;<br>Short=AP-N; Short=pAPN; AltName:<br>Full=Alanyl aminopeptidase; AltName:<br>Full=Aminopeptidase M; Short=AP-M;<br>AltName: Full=Microsomal aminopeptidase;<br>AltName:  | 1.000 | 0.377 | 0.514 | 0.611 | 0.898 |
| gi 350593858 ref XP_003133682.3 <br>PREDICTED: carbamoyl-phosphate synthase<br>[ammonia], mitochondrial isoform 1 [Sus scrofa]                                                                                                                                                                                  | 1.000 | 1.256 | 0.640 | 0.507 | 0.899 |

|                                                                                                                                                                                                                                                                                             |       |       |       |       |       |
|---------------------------------------------------------------------------------------------------------------------------------------------------------------------------------------------------------------------------------------------------------------------------------------------|-------|-------|-------|-------|-------|
| gi 346986447 ref NP_001231373.1  ribonuclease H2 subunit A [Sus scrofa]                                                                                                                                                                                                                     | 1.000 | 0.934 | 1.495 | 0.612 | 0.901 |
| gi 311244862 ref XP_001925828.2 <br>PREDICTED: huntingtin-interacting protein K-like [Sus scrofa]                                                                                                                                                                                           | 1.000 | 0.776 | 1.342 | 1.280 | 0.902 |
| gi 335293615 ref XP_003357006.1 <br>PREDICTED: UDP-glucuronosyltransferase 2A1 [Sus scrofa]                                                                                                                                                                                                 | 1.000 | 0.731 | 0.513 | 0.642 | 0.911 |
| gi 350581370 ref XP_003124307.3 <br>PREDICTED: MICAL-like protein 2 [Sus scrofa]                                                                                                                                                                                                            | 1.000 | 0.502 | 1.128 | 1.227 | 0.912 |
| gi 350591926 ref XP_003358845.2 <br>PREDICTED: golgin subfamily B member 1 [Sus scrofa]                                                                                                                                                                                                     | 1.000 | 0.766 | 0.971 | 0.959 | 0.915 |
| gi 334305778 sp D2SW95.1 COPB_PIG<br>RecName: Full=Coatomer subunit beta;<br>AltName: Full=Beta-coat protein;<br>Short=Beta-COP >gi 288860138 ref NP_001165837.1  coatomer subunit beta [Sus scrofa] >gi 268633765 gb ACZ15983.1  coatomer protein subunit beta 1 [Sus scrofa]              | 1.000 | 1.192 | 0.661 | 0.623 | 0.916 |
| gi 169139278 gb ACA48587.1  liver fatty acid binding protein [Sus scrofa]                                                                                                                                                                                                                   | 1.000 | 0.903 | 1.628 | 1.294 | 0.917 |
| gi 343790893 ref NP_001230504.1  creatine kinase, brain [Sus scrofa]                                                                                                                                                                                                                        | 1.000 | 1.616 | 0.641 | 0.774 | 0.917 |
| gi 311258794 ref XP_003127785.1 <br>PREDICTED: sphingomyelin phosphodiesterase, acid-like 3B [Sus scrofa]                                                                                                                                                                                   | 1.000 | 0.849 | 1.649 | 1.632 | 0.918 |
| gi 350579853 ref XP_003480698.1 <br>PREDICTED: liprin-alpha-1-like [Sus scrofa]                                                                                                                                                                                                             | 1.000 | 1.347 | 1.462 | 1.395 | 0.919 |
| gi 350580953 ref XP_003354274.2 <br>PREDICTED: 60S acidic ribosomal protein P1-like [Sus scrofa]                                                                                                                                                                                            | 1.000 | 0.421 | 1.608 | 1.595 | 0.920 |
| gi 47523794 ref NP_999534.1  voltage-dependent anion-selective channel protein 2 [Sus scrofa] >gi 75050405 sp Q9MZ15.1 VDAC2_PIG<br>RecName: Full=Voltage-dependent anion-selective channel protein 2;<br>Short=VDAC-2 >gi 8745554 gb AAF78964.1 AF268462_1 voltage-dependent anion channel | 1.000 | 0.872 | 0.478 | 0.433 | 0.922 |
| gi 350582129 ref XP_003354780.2 <br>PREDICTED: ig kappa chain V-II region RPMI 6410-like [Sus scrofa]                                                                                                                                                                                       | 1.000 | 0.919 | 1.388 | 1.364 | 0.923 |



|                                                                                                                                                                                            |       |       |       |       |       |
|--------------------------------------------------------------------------------------------------------------------------------------------------------------------------------------------|-------|-------|-------|-------|-------|
| gi 343791015 ref NP_001230554.1 <br>carboxylesterase 3 precursor [Sus scrofa]                                                                                                              | 1.000 | 0.942 | 0.662 | 0.829 | 0.924 |
| gi 297747346 ref NP_001177097.1  S100 calcium<br>binding protein A14 [Sus scrofa]                                                                                                          | 1.000 | 0.868 | 1.211 | 1.289 | 0.925 |
| gi 190360663 ref NP_001121949.1  FYVE and<br>coiled-coil domain-containing protein 1 [Sus<br>scrofa] >gi 41688293 dbj BAD08647.1  FYVE<br>and coiled-coil domain containing 1 [Sus scrofa] | 1.000 | 0.991 | 0.625 | 1.214 | 0.925 |
| gi 1262435 emb CAA61864.1  put. 26S protease<br>subunit [Sus scrofa]                                                                                                                       | 1.000 | 0.765 | 0.820 | 0.599 | 0.929 |
| gi 1332717 gb AAB36056.1  acylamino<br>acid-releasing enzyme, AARE {EC 3.4.19.1}<br>[swine, liver, Peptide, 732<br>aa] >gi 1583737 prf 2121361A acyl-AA<br>releasing enzyme                | 1.000 | 1.103 | 0.791 | 0.977 | 0.930 |
| gi 335286637 ref XP_001927783.3 <br>PREDICTED: nitrilase homolog 1 isoform 2 [Sus<br>scrofa]                                                                                               | 1.000 | 1.142 | 1.595 | 1.118 | 0.932 |
| gi 325652134 ref NP_001191701.1 <br>bromodomain-containing protein 4 [Sus<br>scrofa] >gi 321172828 gb ADW77216.1 <br>bromodomain-containing protein 4 [Sus scrofa]                         | 1.000 | 0.575 | 1.145 | 0.883 | 0.932 |
| gi 218664491 ref NP_001136314.1  galectin-3<br>[Sus scrofa] >gi 215254098 gb ACJ64061.1 <br>lectin galactoside-binding soluble 2 protein [Sus<br>scrofa]                                   | 1.000 | 1.047 | 1.249 | 0.849 | 0.939 |
| gi 2833354 sp Q29223.2 RL34_PIG RecName:<br>Full=60S ribosomal protein L34                                                                                                                 | 1.000 | 0.879 | 0.523 | 0.566 | 0.941 |
| gi 350591034 ref XP_003483187.1 <br>PREDICTED: glycerol-3-phosphate<br>dehydrogenase 1-like protein-like [Sus scrofa]                                                                      | 1.000 | 1.304 | 0.697 | 0.704 | 0.941 |
| gi 350587641 ref XP_003129114.3 <br>PREDICTED: UDP-glucuronosyltransferase<br>2C1-like [Sus scrofa]                                                                                        | 1.000 | 0.934 | 0.430 | 0.670 | 0.942 |
| gi 335287882 ref XP_003126232.2 <br>PREDICTED: LOW QUALITY PROTEIN:<br>sterol O-acyltransferase 2-like [Sus scrofa]                                                                        | 1.000 | 1.336 | 0.918 | 1.402 | 0.942 |
| gi 346227222 ref NP_001230997.1  ribosomal<br>protein L13a isoform 1 [Sus scrofa]                                                                                                          | 1.000 | 0.802 | 0.636 | 0.500 | 0.943 |
| gi 346421386 ref NP_001231066.1  ATP<br>synthase subunit g, mitochondrial [Sus scrofa]                                                                                                     | 1.000 | 0.905 | 0.362 | 0.382 | 0.946 |
| gi 113205668 ref NP_001038021.1  microsomal                                                                                                                                                | 1.000 | 1.689 | 0.870 | 0.986 | 0.950 |

|                                                                                                                                                                                                           |       |       |       |       |       |
|-----------------------------------------------------------------------------------------------------------------------------------------------------------------------------------------------------------|-------|-------|-------|-------|-------|
| glutathione S-transferase 3 [Sus scrofa] >gi 120564453 gb ABM30152.1  microsomal glutathione S-transferase 3 [Sus scrofa] >gi 87047644 gb ABD18455.1  microsomal glutathione S-transferase 3 [Sus scrofa] |       |       |       |       |       |
| gi 311260243 ref XP_001927987.2  PREDICTED: protein CutA isoform 1 [Sus scrofa]                                                                                                                           | 1.000 | 0.621 | 2.449 | 1.975 | 0.951 |
| gi 350597193 ref XP_003484383.1  PREDICTED: LOW QUALITY PROTEIN: peptidyl-prolyl cis-trans isomerase B [Sus scrofa]                                                                                       | 1.000 | 0.394 | 1.723 | 0.922 | 0.958 |
| gi 311255888 ref XP_003126410.1  PREDICTED: cullin-associated NEDD8-dissociated protein 1-like [Sus scrofa]                                                                                               | 1.000 | 1.430 | 0.839 | 0.627 | 0.959 |
| gi 311250237 ref XP_003124024.1  PREDICTED: stress-70 protein, mitochondrial [Sus scrofa]                                                                                                                 | 1.000 | 0.877 | 0.886 | 0.721 | 0.961 |
| gi 45269029 gb AAS55927.1  cytoskeletal beta actin, partial [Sus scrofa]                                                                                                                                  | 1.000 | 1.089 | 0.585 | 0.609 | 0.964 |
| gi 350587231 ref XP_003482373.1  PREDICTED: LOW QUALITY PROTEIN: cytoplasmic dynein 1 heavy chain 1 [Sus scrofa]                                                                                          | 1.000 | 1.192 | 0.769 | 0.690 | 0.967 |
| gi 335281560 ref XP_003353830.1  PREDICTED: splicing factor 1 isoform 2 [Sus scrofa]                                                                                                                      | 1.000 | 1.140 | 1.611 | 1.992 | 0.968 |
| gi 343098455 ref NP_001230202.1  ras-related protein Rab-6A [Sus scrofa]                                                                                                                                  | 1.000 | 1.156 | 0.719 | 0.616 | 0.970 |
| gi 350582040 ref XP_003481180.1  PREDICTED: U5 small nuclear ribonucleoprotein 200 kDa helicase-like [Sus scrofa]                                                                                         | 1.000 | 1.299 | 0.968 | 0.982 | 0.974 |
| gi 312283580 ref NP_999292.2  superoxide dismutase [Mn], mitochondrial [Sus scrofa]                                                                                                                       | 1.000 | 0.970 | 1.800 | 0.677 | 0.974 |
| gi 335293826 ref XP_003357065.1  PREDICTED: LOW QUALITY PROTEIN: short coiled-coil protein-like [Sus scrofa]                                                                                              | 1.000 | 0.372 | 3.119 | 1.888 | 0.975 |
| gi 385648282 ref NP_001245314.1  glucosidase, beta (bile acid) 2 [Sus scrofa]                                                                                                                             | 1.000 | 0.636 | 0.760 | 0.737 | 0.977 |
| gi 124857 sp P00998.1 ISK1_PIG RecName: Full=Pancreatic secretory trypsin inhibitor; AltName: Full=Serine protease inhibitor                                                                              | 1.000 | 0.546 | 1.059 | 0.297 | 0.980 |

|                                                                                                                                                                                                                                                                                          |       |       |       |       |       |
|------------------------------------------------------------------------------------------------------------------------------------------------------------------------------------------------------------------------------------------------------------------------------------------|-------|-------|-------|-------|-------|
| Kazal-type 1 >gi 230351 pdb 1TGS I Chain I, Three-Dimensional Structure Of The Complex Between Pancreatic Secretory Inhibitor (Kazal Type) And Trypsinogen                                                                                                                               |       |       |       |       |       |
| gi 350592528 ref XP_003483480.1  PREDICTED: endoplasmic reticulum resident protein 29 [Sus scrofa]                                                                                                                                                                                       | 1.000 | 0.787 | 1.304 | 1.172 | 0.982 |
| gi 350579445 ref XP_003480606.1  PREDICTED: protein NipSnap homolog 3A-like [Sus scrofa]                                                                                                                                                                                                 | 1.000 | 0.842 | 1.427 | 1.801 | 0.984 |
| gi 347543818 ref NP_001231565.1  cytochrome P450, family 4, subfamily F, polypeptide 55 precursor [Sus scrofa]                                                                                                                                                                           | 1.000 | 0.959 | 0.472 | 0.472 | 0.986 |
| gi 113205892 ref NP_001038077.1  tubulin beta chain [Sus scrofa] >gi 75045190 sp Q767L7.1 TBB5_PIG RecName: Full=Tubulin beta chain; AltName: Full=Tubulin beta-5 chain >gi 81174748 gb ABB58916.1  beta 5-tubulin [Sus scrofa] >gi 41529175 dbj BAD08435.1  beta 5-tubulin [Sus scrofa] | 1.000 | 0.788 | 0.442 | 0.456 | 0.987 |
| gi 45268981 gb AAS55903.1  60S ribosomal protein L12, partial [Sus scrofa]                                                                                                                                                                                                               | 1.000 | 0.878 | 0.609 | 0.594 | 0.987 |
| gi 164543 gb AAA31072.1  malate dehydrogenase (EC 1.1.1.37), partial [Sus scrofa]                                                                                                                                                                                                        | 1.000 | 0.973 | 0.715 | 0.601 | 0.988 |
| gi 239504558 ref NP_001155112.1  caspase-10 [Sus scrofa] >gi 229365449 dbj BAH57972.1  caspase 10 [Sus scrofa]                                                                                                                                                                           | 1.000 | 1.116 | 0.668 | 0.738 | 0.988 |
| gi 462384 sp P33198.1 IDHP_PIG RecName: Full=Isocitrate dehydrogenase [NADP], mitochondrial; Short=IDH; AltName: Full=ICD-M; AltName: Full=IDP; AltName: Full=NADP(+)-specific ICDH; AltName: Full=Oxalosuccinate decarboxylase; Flags: Precursor >gi 294223 gb AAA31089.1  NADPH-specif | 1.000 | 1.284 | 0.588 | 0.640 | 0.990 |
| gi 157427728 ref NP_001098772.1  ATP-citrate synthase isoform 2 [Sus scrofa] >gi 380509279 gb AFD64642.1  ATP citrate lyase short isoform [Sus scrofa] >gi 156140098 gb ABU51323.1  ATP citrate lyase [Sus scrofa]                                                                       | 1.000 | 0.960 | 0.574 | 0.853 | 0.991 |

|                                                                                                                                                                                                                                                            |       |       |       |       |       |
|------------------------------------------------------------------------------------------------------------------------------------------------------------------------------------------------------------------------------------------------------------|-------|-------|-------|-------|-------|
| gi 346716326 ref NP_001231181.1  SWI/SNF-related matrix-associated actin-dependent regulator of chromatin subfamily D member 2 [Sus scrofa]                                                                                                                | 1.000 | 0.627 | 0.547 | 0.905 | 0.991 |
| gi 47522800 ref NP_999152.1  60S ribosomal protein L22 [Sus scrofa] >gi 54039123 sp P67985.2 RL22_PIG RecName: Full=60S ribosomal protein L22; AltName: Full=Heparin-binding protein HBp15 >gi 409074 dbj BAA04547.1  heparin binding protein [Sus scrofa] | 1.000 | 0.815 | 0.549 | 0.479 | 0.997 |
| gi 343478210 ref NP_001230371.1  syntaxin 12 [Sus scrofa]                                                                                                                                                                                                  | 1.000 | 0.949 | 1.837 | 2.884 | 1.001 |
| gi 311249251 ref XP_003123542.1  PREDICTED: 6-phosphogluconolactonase-like [Sus scrofa]                                                                                                                                                                    | 1.000 | 1.405 | 0.796 | 0.756 | 1.009 |
| gi 350587377 ref XP_003356918.2  PREDICTED: cytosol aminopeptidase-like [Sus scrofa]                                                                                                                                                                       | 1.000 | 1.687 | 2.747 | 3.579 | 1.011 |
| gi 350586674 ref XP_001929500.4  PREDICTED: exportin-5 [Sus scrofa]                                                                                                                                                                                        | 1.000 | 0.936 | 0.699 | 0.653 | 1.018 |
| gi 351738777 gb AEQ61487.1  ribokinase [Sus scrofa]                                                                                                                                                                                                        | 1.000 | 1.083 | 1.493 | 1.603 | 1.019 |
| gi 350580256 ref XP_003480773.1  PREDICTED: nucleobindin-2 [Sus scrofa]                                                                                                                                                                                    | 1.000 | 0.608 | 1.207 | 1.564 | 1.020 |
| gi 350593062 ref XP_003133228.3  PREDICTED: xaa-Pro aminopeptidase 1 isoform 2 [Sus scrofa]                                                                                                                                                                | 1.000 | 1.117 | 0.832 | 0.607 | 1.023 |
| gi 335298834 ref XP_003358406.1  PREDICTED: leucine-rich repeat flightless-interacting protein 2 [Sus scrofa]                                                                                                                                              | 1.000 | 0.894 | 1.546 | 1.044 | 1.027 |
| gi 47522844 ref NP_999174.1  complement C3 precursor [Sus scrofa] >gi 11869931 gb AAG40565.1 AF154933_1 complement component C3 [Sus scrofa] >gi 27801787 emb CAD38823.2  complement C3 precursor [Sus scrofa]                                             | 1.000 | 0.640 | 0.917 | 0.806 | 1.028 |
| gi 342672022 ref NP_001230144.1  exportin-2 [Sus scrofa]                                                                                                                                                                                                   | 1.000 | 1.359 | 0.529 | 0.497 | 1.030 |
| gi 335284313 ref XP_003124517.2  PREDICTED: RNA-binding protein FUS-like isoform 1 [Sus scrofa]                                                                                                                                                            | 1.000 | 0.713 | 0.899 | 0.633 | 1.032 |

|                                                                                                                                                                             |       |       |       |       |       |
|-----------------------------------------------------------------------------------------------------------------------------------------------------------------------------|-------|-------|-------|-------|-------|
| gi 350583346 ref XP_003125776.3 <br>PREDICTED: ubiquitin associated protein 2-like isoform 3 [Sus scrofa]                                                                   | 1.000 | 0.946 | 1.471 | 1.696 | 1.033 |
| gi 335307509 ref XP_003360867.1 <br>PREDICTED: lipoma-preferred partner-like, partial [Sus scrofa]                                                                          | 1.000 | 0.795 | 1.317 | 1.276 | 1.036 |
| gi 335297068 ref XP_001927259.3 <br>PREDICTED: CLYBL protein [Sus scrofa]                                                                                                   | 1.000 | 0.888 | 1.271 | 1.636 | 1.036 |
| gi 311276332 ref XP_003135175.1 <br>PREDICTED: 3-hydroxyacyl-CoA dehydrogenase type-2-like isoform 2 [Sus scrofa]                                                           | 1.000 | 1.185 | 0.750 | 0.745 | 1.037 |
| gi 311246780 ref XP_003122339.1 <br>PREDICTED: haloacid dehalogenase-like hydrolase domain-containing protein 2-like [Sus scrofa]                                           | 1.000 | 0.868 | 1.466 | 1.718 | 1.043 |
| gi 350591495 ref XP_003132454.3 <br>PREDICTED: coatomer subunit gamma [Sus scrofa]                                                                                          | 1.000 | 1.377 | 0.929 | 0.721 | 1.045 |
| gi 311258000 ref XP_003127386.1 <br>PREDICTED: AP-2 complex subunit alpha-1 isoform 1 [Sus scrofa]                                                                          | 1.000 | 1.207 | 0.648 | 0.815 | 1.052 |
| gi 311259466 ref XP_003128111.1 <br>PREDICTED: putative hydroxypyruvate isomerase-like isoform 1 [Sus scrofa]                                                               | 1.000 | 1.019 | 2.107 | 1.793 | 1.053 |
| gi 350582315 ref XP_003481243.1 <br>PREDICTED: NFU1 iron-sulfur cluster scaffold homolog, mitochondrial-like [Sus scrofa]                                                   | 1.000 | 0.809 | 1.818 | 1.689 | 1.055 |
| gi 212549623 ref NP_001131101.1  endoplasmic reticulum resident protein 44 precursor [Sus scrofa] >gi 187480160 gb ACD13000.1  thioredoxin domain-containing 4 [Sus scrofa] | 1.000 | 1.194 | 0.716 | 0.968 | 1.059 |
| gi 350586216 ref XP_003128039.3 <br>PREDICTED: thioredoxin domain-containing protein 12-like [Sus scrofa]                                                                   | 1.000 | 0.456 | 1.098 | 1.272 | 1.059 |
| gi 350584903 ref XP_003126945.3 <br>PREDICTED: AP-1 complex subunit gamma-1 isoform 1 [Sus scrofa]                                                                          | 1.000 | 1.115 | 0.685 | 0.787 | 1.059 |
| gi 346421347 ref NP_001231022.1 <br>glucosamine-6-phosphate isomerase 1 [Sus scrofa]                                                                                        | 1.000 | 0.958 | 1.649 | 1.438 | 1.064 |
| gi 113205878 ref NP_001038072.1 <br>delta(3,5)-Delta(2,4)-dienoyl-CoA isomerase,                                                                                            | 1.000 | 1.299 | 1.408 | 0.971 | 1.065 |

|                                                                                                                                                                      |       |       |       |       |       |
|----------------------------------------------------------------------------------------------------------------------------------------------------------------------|-------|-------|-------|-------|-------|
| mitochondrial [Sus scrofa] >gi 90024980 gb AAZ82038.2  peroxisomal enoyl coenzyme A hydratase 1 [Sus scrofa]                                                         |       |       |       |       |       |
| gi 311275226 ref XP_003134622.1  PREDICTED: glutathione S-transferase kappa 1-like isoform 2 [Sus scrofa]                                                            | 1.000 | 0.864 | 0.619 | 0.577 | 1.072 |
| gi 57528035 ref NP_001009582.1  stathmin [Sus scrofa] >gi 75043336 sp Q6DUB7.3 STMN1_PI G RecName: Full=Stathmin >gi 49615355 gb AAT66936.1  stathmin-1 [Sus scrofa] | 1.000 | 0.699 | 1.231 | 1.255 | 1.081 |
| gi 343488538 ref NP_001230424.1  cytoplasmic dynein 1 intermediate chain 2 [Sus scrofa]                                                                              | 1.000 | 0.686 | 1.581 | 1.663 | 1.087 |
| gi 346716298 ref NP_001231025.1  heterogeneous nuclear ribonucleoprotein G [Sus scrofa]                                                                              | 1.000 | 0.958 | 1.657 | 1.159 | 1.090 |
| gi 298104082 ref NP_001177109.1  dynein light chain roadblock-type 1 [Sus scrofa]                                                                                    | 1.000 | 0.847 | 2.213 | 3.050 | 1.090 |
| gi 335310032 ref XP_003126353.2  PREDICTED: dynactin subunit 2-like isoform 3 [Sus scrofa]                                                                           | 1.000 | 1.748 | 1.035 | 0.915 | 1.093 |
| gi 311246990 ref XP_003122442.1  PREDICTED: mucin-2, partial [Sus scrofa]                                                                                            | 1.000 | 1.835 | 0.865 | 0.677 | 1.098 |
| gi 335280113 ref XP_003121789.2  PREDICTED: LOW QUALITY PROTEIN: 60S ribosomal protein L4 [Sus scrofa]                                                               | 1.000 | 0.772 | 0.477 | 0.419 | 1.100 |
| gi 350595475 ref XP_003360255.2  PREDICTED: proteasome subunit alpha type-2-like [Sus scrofa]                                                                        | 1.000 | 0.713 | 2.004 | 2.133 | 1.102 |
| gi 350586921 ref XP_003482304.1  PREDICTED: LOW QUALITY PROTEIN: apoptotic chromatin condensation inducer in the nucleus-like [Sus scrofa]                           | 1.000 | 0.842 | 1.424 | 0.894 | 1.102 |
| gi 311261483 ref XP_003128742.1  PREDICTED: LOW QUALITY PROTEIN: golgin subfamily A member 5-like [Sus scrofa]                                                       | 1.000 | 1.092 | 1.630 | 1.604 | 1.104 |
| gi 350594033 ref XP_003483821.1  PREDICTED: UDP-glucuronosyltransferase 1-10 isoform 2 [Sus scrofa]                                                                  | 1.000 | 0.806 | 0.583 | 0.609 | 1.105 |
| gi 347300356 ref NP_001231473.1  uncharacterized protein LOC100689297 [Sus                                                                                           | 1.000 | 1.224 | 1.686 | 1.919 | 1.106 |

|                                                                                                                                                                                                                                                                                                                  |       |       |       |       |       |
|------------------------------------------------------------------------------------------------------------------------------------------------------------------------------------------------------------------------------------------------------------------------------------------------------------------|-------|-------|-------|-------|-------|
| scrofa]                                                                                                                                                                                                                                                                                                          |       |       |       |       |       |
| gi 350581286 ref XP_003124146.3 <br>PREDICTED: hypothetical protein<br>LOC100516425 [Sus scrofa]                                                                                                                                                                                                                 | 1.000 | 1.102 | 1.883 | 1.285 | 1.111 |
| gi 297591969 ref NP_001172062.1 <br>ubiquitin-conjugating enzyme E2 L3 [Sus<br>scrofa] >gi 219563058 gb ACL27888.1 <br>ubiquitin-conjugating enzyme E2L 3 [Sus scrofa]                                                                                                                                           | 1.000 | 0.729 | 1.377 | 1.106 | 1.111 |
| gi 75051712 sp Q9TUB5.1 CLCA1_PIG<br>RecName: Full=Calcium-activated chloride<br>channel regulator 1; AltName:<br>Full=Calcium-activated chloride channel family<br>member 1; AltName: Full=pCLCA1; Flags:<br>Precursor >gi 47523388 ref NP_999313.1 <br>calcium-activated chloride channel regulator 1<br>precu | 1.000 | 1.042 | 1.503 | 1.076 | 1.117 |
| gi 194038540 ref XP_001929175.1 <br>PREDICTED: ectonucleoside triphosphate<br>diphosphohydrolase 5 [Sus scrofa]                                                                                                                                                                                                  | 1.000 | 0.769 | 0.948 | 0.509 | 1.118 |
| gi 346986324 ref NP_001231316.1  tumor protein<br>D52 [Sus scrofa]                                                                                                                                                                                                                                               | 1.000 | 0.720 | 0.882 | 1.075 | 1.124 |
| gi 329663924 ref NP_001192332.1 <br>tubulin-folding cofactor B-like [Sus<br>scrofa] >gi 24528346 emb CAD56044.1 <br>cytoskeleton-associated protein 1 [Sus scrofa]                                                                                                                                               | 1.000 | 1.001 | 1.310 | 1.194 | 1.124 |
| gi 335310868 ref XP_003362230.1 <br>PREDICTED: T-complex protein 1 subunit<br>epsilon, partial [Sus scrofa]                                                                                                                                                                                                      | 1.000 | 1.491 | 0.598 | 0.472 | 1.125 |
| gi 122064583 sp P04178.2 SODC_PIG<br>RecName: Full=Superoxide dismutase<br>[Cu-Zn] >gi 298677090 ref NP_001177351.1 <br>superoxide dismutase [Cu-Zn] [Sus<br>scrofa] >gi 297593564 gb ADI47520.1 <br>superoxide dismutase 1 [Sus scrofa]                                                                         | 1.000 | 0.935 | 1.540 | 1.450 | 1.125 |
| gi 325652138 ref NP_001191702.1  A-kinase<br>anchor protein 1, mitochondrial [Sus<br>scrofa] >gi 321267428 dbj BAJ72691.1  A kinase<br>anchor protein 1 [Sus scrofa]                                                                                                                                             | 1.000 | 0.686 | 1.180 | 1.032 | 1.126 |
| gi 350585075 ref XP_003481870.1 <br>PREDICTED: xaa-Pro dipeptidase-like [Sus<br>scrofa]                                                                                                                                                                                                                          | 1.000 | 1.176 | 1.013 | 1.704 | 1.131 |
| gi 335300836 ref XP_003359054.1 <br>PREDICTED: ES1 protein homolog,                                                                                                                                                                                                                                              | 1.000 | 0.485 | 1.208 | 0.769 | 1.133 |

|                                                                                                                                                                                                                                                                                                                    |       |       |       |       |       |
|--------------------------------------------------------------------------------------------------------------------------------------------------------------------------------------------------------------------------------------------------------------------------------------------------------------------|-------|-------|-------|-------|-------|
| mitochondrial-like [Sus scrofa]                                                                                                                                                                                                                                                                                    |       |       |       |       |       |
| gi 350592730 ref XP_003483523.1 <br>PREDICTED: heterogeneous nuclear<br>ribonucleoprotein F [Sus<br>scrofa] >gi 335301642 ref XP_003359253.1 <br>PREDICTED: heterogeneous nuclear<br>ribonucleoprotein F [Sus<br>scrofa] >gi 194042674 ref XP_001929089.1 <br>PREDICTED: heterogeneous nuclear<br>ribonucleoprotei | 1.000 | 1.215 | 1.290 | 1.078 | 1.133 |
| gi 350587966 ref XP_003482525.1 <br>PREDICTED: PDZ and LIM domain protein 5<br>isoform 3 [Sus scrofa]                                                                                                                                                                                                              | 1.000 | 0.779 | 1.597 | 1.479 | 1.140 |
| gi 194037005 ref XP_001928988.1 <br>PREDICTED: ribonuclease UK114-like isoform<br>1 [Sus scrofa]                                                                                                                                                                                                                   | 1.000 | 1.117 | 2.581 | 2.299 | 1.141 |
| gi 350581741 ref XP_003124660.3 <br>PREDICTED: phosphomannomutase 2-like,<br>partial [Sus scrofa]                                                                                                                                                                                                                  | 1.000 | 1.863 | 1.052 | 1.590 | 1.141 |
| gi 350586779 ref XP_003482273.1 <br>PREDICTED: LOW QUALITY PROTEIN: IQ<br>motif containing GTPase activating protein 1<br>[Sus scrofa]                                                                                                                                                                             | 1.000 | 1.126 | 0.971 | 0.793 | 1.146 |
| gi 1900 emb CAA27575.1  unnamed protein<br>product [Sus scrofa]                                                                                                                                                                                                                                                    | 1.000 | 1.005 | 0.503 | 0.769 | 1.152 |
| gi 350582471 ref XP_003125244.3 <br>PREDICTED: echinoderm microtubule<br>associated protein like 4 [Sus scrofa]                                                                                                                                                                                                    | 1.000 | 0.952 | 1.303 | 1.407 | 1.152 |
| gi 83921635 ref NP_001033089.1  FKBP1A-like<br>[Sus scrofa] >gi 61098747 gb AAX37547.1 <br>FKBP1A-like [Sus scrofa]                                                                                                                                                                                                | 1.000 | 1.011 | 1.849 | 1.720 | 1.154 |
| gi 350584176 ref XP_003481686.1 <br>PREDICTED: myosin-Ia-like [Sus scrofa]                                                                                                                                                                                                                                         | 1.000 | 0.968 | 0.862 | 0.644 | 1.164 |
| gi 311259195 ref XP_003127983.1 <br>PREDICTED: plasminogen activator inhibitor 1<br>RNA-binding protein-like isoform 2 [Sus scrofa]                                                                                                                                                                                | 1.000 | 1.114 | 1.411 | 1.334 | 1.164 |
| gi 350583407 ref XP_003481511.1 <br>PREDICTED: cathepsin S [Sus scrofa]                                                                                                                                                                                                                                            | 1.000 | 0.807 | 3.109 | 2.841 | 1.171 |
| gi 322510017 sp Q007T2.2 CDC42_PIG<br>RecName: Full=Cell division control protein 42<br>homolog; Flags:<br>Precursor >gi 269994011 dbj BAI50642.1  Cell<br>division control protein 42 homolog [Sus scrofa]                                                                                                        | 1.000 | 1.125 | 0.764 | 0.921 | 1.172 |



|                                                                                                                                                                                                                                                                                                                  |       |       |       |       |       |
|------------------------------------------------------------------------------------------------------------------------------------------------------------------------------------------------------------------------------------------------------------------------------------------------------------------|-------|-------|-------|-------|-------|
| gi 335291962 ref XP_001928015.3 <br>PREDICTED: E3 ubiquitin-protein ligase<br>TRIM31 [Sus<br>scrofa] >gi 211926941 dbj BAG82682.1 <br>tripartite motif-containing protein 31 [Sus scrofa]                                                                                                                        | 1.000 | 0.990 | 0.644 | 1.319 | 1.179 |
| gi 350590070 ref XP_003131163.3 <br>PREDICTED: paraspeckle component 1 [Sus<br>scrofa]                                                                                                                                                                                                                           | 1.000 | 1.256 | 0.892 | 0.844 | 1.179 |
| gi 225450 prf 1303334A valosin precursor                                                                                                                                                                                                                                                                         | 1.000 | 1.408 | 0.778 | 0.889 | 1.181 |
| gi 350590733 ref XP_003131874.3 <br>PREDICTED: pre-mRNA-processing-splicing<br>factor 8, partial [Sus scrofa]                                                                                                                                                                                                    | 1.000 | 1.245 | 0.745 | 0.327 | 1.182 |
| gi 343790906 ref NP_001230510.1 <br>calcineurin-like phosphoesterase domain<br>containing 1 [Sus scrofa]                                                                                                                                                                                                         | 1.000 | 0.755 | 2.436 | 1.559 | 1.194 |
| gi 178056532 ref NP_001116688.1 <br>Z-DNA-binding protein 1 [Sus<br>scrofa] >gi 147223427 emb CAN13344.1 <br>Z-DNA binding protein 1 [Sus scrofa]                                                                                                                                                                | 1.000 | 0.703 | 0.731 | 1.318 | 1.195 |
| gi 350587405 ref XP_003482406.1 <br>PREDICTED: cytosolic beta-glucosidase-like,<br>partial [Sus scrofa]                                                                                                                                                                                                          | 1.000 | 1.402 | 0.973 | 0.831 | 1.198 |
| gi 335297344 ref XP_003131243.2 <br>PREDICTED: integrin beta-4-like [Sus scrofa]                                                                                                                                                                                                                                 | 1.000 | 0.730 | 1.151 | 1.519 | 1.199 |
| gi 194038734 ref XP_001929226.1 <br>PREDICTED: protein transport protein Sec23A<br>isoform 2 [Sus scrofa]                                                                                                                                                                                                        | 1.000 | 1.655 | 0.875 | 0.634 | 1.202 |
| gi 311272700 ref XP_003133549.1 <br>PREDICTED: heterogeneous nuclear<br>ribonucleoprotein A3-like isoform 1 [Sus scrofa]                                                                                                                                                                                         | 1.000 | 1.347 | 0.704 | 0.642 | 1.203 |
| gi 75053043 sp Q6UAQ8.3 ETFB_PIG<br>RecName: Full=Electron transfer flavoprotein<br>subunit beta;<br>Short=Beta-ETF >gi 328550534 ref NP_0011922<br>08.1  electron transfer flavoprotein subunit beta<br>[Sus scrofa] >gi 35384838 gb AAQ84565.1 <br>electron transfer flavoprotein beta subunit<br>precursor [S | 1.000 | 1.237 | 0.867 | 1.028 | 1.205 |
| gi 350582454 ref XP_003125231.3 <br>PREDICTED: LOW QUALITY PROTEIN:<br>leucine-rich PPR motif-containing protein,<br>mitochondrial [Sus scrofa]                                                                                                                                                                  | 1.000 | 1.183 | 0.968 | 0.808 | 1.206 |
| gi 356582293 ref NP_001239141.1  DEAH                                                                                                                                                                                                                                                                            | 1.000 | 0.875 | 0.801 | 0.869 | 1.207 |

|                                                                                                                                                                                                                                                                                       |       |       |       |       |       |
|---------------------------------------------------------------------------------------------------------------------------------------------------------------------------------------------------------------------------------------------------------------------------------------|-------|-------|-------|-------|-------|
| (Asp-Glu-Ala-His) box polypeptide 15 [Sus scrofa]                                                                                                                                                                                                                                     |       |       |       |       |       |
| gi 47523822 ref NP_999549.1  glutamate carboxypeptidase 2 [Sus scrofa] >gi 20138100 sp O77564.1 FOLH1_PIG RecName: Full=Glutamate carboxypeptidase 2; AltName: Full=Folate hydrolase 1; AltName: Full=Folylpoly-gamma-glutamate carboxypeptidase; Short=FGCP; AltName: Full=Glutamate | 1.000 | 1.112 | 2.071 | 2.577 | 1.210 |
| gi 194044822 ref XP_001927404.1  PREDICTED: peroxiredoxin-4 [Sus scrofa]                                                                                                                                                                                                              | 1.000 | 0.450 | 1.472 | 1.707 | 1.213 |
| gi 311250752 ref XP_003124284.1  PREDICTED: NACHT, LRR and PYD domains-containing protein 6 [Sus scrofa]                                                                                                                                                                              | 1.000 | 1.000 | 2.178 | 1.782 | 1.213 |
| gi 148231223 ref NP_001090898.1  mitochondrial antiviral-signaling protein [Sus scrofa] >gi 156144883 gb ABU53000.1  virus-induced signaling adapter [Sus scrofa] >gi 119507309 dbj BAF42542.1  mitochondrial antiviral signaling protein [Sus scrofa]                                | 1.000 | 0.771 | 1.333 | 1.416 | 1.219 |
| gi 311247536 ref XP_003122689.1  PREDICTED: bifunctional ATP-dependent dihydroxyacetone kinase/FAD-AMP lyase (cyclizing)-like [Sus scrofa]                                                                                                                                            | 1.000 | 1.863 | 0.874 | 0.935 | 1.222 |
| gi 194036835 ref XP_001924895.1  PREDICTED: 4-trimethylaminobutyraldehyde dehydrogenase [Sus scrofa]                                                                                                                                                                                  | 1.000 | 1.684 | 0.809 | 0.783 | 1.223 |
| gi 311250151 ref XP_003123979.1  PREDICTED: heat shock 70 kDa protein 4 [Sus scrofa]                                                                                                                                                                                                  | 1.000 | 1.453 | 2.216 | 1.688 | 1.224 |
| gi 148234672 ref NP_001090881.1  porphobilinogen deaminase [Sus scrofa] >gi 112980813 gb ABI29188.1  hydroxymethylbilane synthase [Sus scrofa]                                                                                                                                        | 1.000 | 0.860 | 2.163 | 1.615 | 1.225 |
| gi 213021241 ref NP_001132944.1  proteasome subunit alpha type-6 [Sus scrofa] >gi 210062872 gb ACJ06406.1  proteasome subunit alpha type 6 [Sus scrofa]                                                                                                                               | 1.000 | 1.055 | 1.229 | 1.076 | 1.231 |
| gi 335303414 ref XP_001928370.3  PREDICTED: tubulin alpha-4A chain [Sus scrofa]                                                                                                                                                                                                       | 1.000 | 1.239 | 0.760 | 0.683 | 1.233 |

|                                                                                                                                                                                                                                                                                                        |       |       |       |       |       |
|--------------------------------------------------------------------------------------------------------------------------------------------------------------------------------------------------------------------------------------------------------------------------------------------------------|-------|-------|-------|-------|-------|
| gi 335296459 ref XP_003130769.2 <br>PREDICTED: vimentin-like [Sus scrofa]                                                                                                                                                                                                                              | 1.000 | 0.816 | 1.537 | 1.283 | 1.234 |
| gi 194033860 ref XP_001927901.1 <br>PREDICTED: UV excision repair protein<br>RAD23 homolog B [Sus scrofa]                                                                                                                                                                                              | 1.000 | 1.642 | 2.407 | 2.937 | 1.236 |
| gi 164669 gb AAA31120.1  succinyl-CoA<br>synthetase beta-subunit, partial [Sus scrofa]                                                                                                                                                                                                                 | 1.000 | 1.758 | 0.974 | 0.824 | 1.244 |
| gi 148232214 ref NP_001090964.1 <br>ribose-5-phosphate isomerase [Sus<br>scrofa] >gi 158512830 sp A2TLM1.1 RPIA_PIG<br>RecName: Full=Ribose-5-phosphate isomerase;<br>AltName:<br>Full=Phosphoriboisomerase >gi 124265188 gb A<br>BM98101.1  ribose 5-phosphate isomerase-like<br>protein [Sus scrofa] | 1.000 | 0.938 | 3.291 | 3.682 | 1.253 |
| gi 194036975 ref XP_001927782.1 <br>PREDICTED: polyadenylate-binding protein 1<br>[Sus scrofa]                                                                                                                                                                                                         | 1.000 | 0.878 | 1.445 | 1.228 | 1.255 |
| gi 190360593 ref NP_001121945.1 <br>interferon-induced guanylate-binding protein 1<br>[Sus scrofa] >gi 166202346 gb ABY84597.1 <br>guanylate binding protein 1 [Sus scrofa]                                                                                                                            | 1.000 | 0.933 | 0.844 | 0.731 | 1.258 |
| gi 47523692 ref NP_999478.1  thioredoxin [Sus<br>scrofa] >gi 20141821 sp P82460.3 THIO_PIG<br>RecName: Full=Thioredoxin;<br>Short=Trx >gi 332368598 gb AEE61373.1 <br>thioredoxin [Sus<br>scrofa] >gi 14326453 gb AAK60272.1 AF382821<br>_1 thioredoxin [Sus scrofa]                                   | 1.000 | 1.007 | 2.615 | 2.229 | 1.258 |
| gi 343488474 ref NP_001230453.1  elongation<br>factor 1-beta [Sus scrofa]                                                                                                                                                                                                                              | 1.000 | 0.927 | 1.277 | 2.426 | 1.258 |
| gi 225735709 ref NP_001139599.1  clathrin<br>heavy chain 1 [Sus<br>scrofa] >gi 224492556 emb CAR65329.1 <br>clathrin heavy chain [Sus scrofa]                                                                                                                                                          | 1.000 | 1.218 | 0.807 | 0.717 | 1.260 |
| gi 350582501 ref XP_003481284.1 <br>PREDICTED: atlastin-2-like isoform 2 [Sus<br>scrofa]                                                                                                                                                                                                               | 1.000 | 1.596 | 1.146 | 0.929 | 1.273 |
| gi 350584145 ref XP_001929467.3 <br>PREDICTED: nascent polypeptide-associated<br>complex subunit alpha isoform 1 [Sus scrofa]                                                                                                                                                                          | 1.000 | 0.879 | 1.852 | 1.608 | 1.283 |
| gi 335305558 ref XP_003134901.2 <br>PREDICTED: heterogeneous nuclear                                                                                                                                                                                                                                   | 1.000 | 1.127 | 0.765 | 0.745 | 1.284 |

|                                                                                                                                                                                                                                                                                              |       |       |       |       |       |
|----------------------------------------------------------------------------------------------------------------------------------------------------------------------------------------------------------------------------------------------------------------------------------------------|-------|-------|-------|-------|-------|
| ribonucleoproteins A2/B1 isoform 1 [Sus scrofa]                                                                                                                                                                                                                                              |       |       |       |       |       |
| gi 48675927 ref NP_001001632.1  tropomyosin alpha-3 chain [Sus scrofa] >gi 45272586 gb AAS57724.1  tropomyosin 3 [Sus scrofa]                                                                                                                                                                | 1.000 | 0.426 | 1.649 | 1.820 | 1.290 |
| gi 148225750 ref NP_001090973.1  heat shock protein 105 kDa [Sus scrofa] >gi 141521428 gb ABO88027.1  heat shock 105kDa/110kDa protein 1 [Sus scrofa]                                                                                                                                        | 1.000 | 0.908 | 1.023 | 0.959 | 1.296 |
| gi 343790920 ref NP_001230517.1  fumarate hydratase [Sus scrofa]                                                                                                                                                                                                                             | 1.000 | 1.509 | 0.966 | 0.890 | 1.303 |
| gi 60394813 sp Q29201.4 RS16_PIG RecName: Full=40S ribosomal protein S16 >gi 212549659 ref NP_001131092.1  40S ribosomal protein S16 [Sus scrofa] >gi 335289675 ref XP_003355953.1  PREDICTED: 40S ribosomal protein S16-like isoform 2 [Sus scrofa] >gi 335289677 ref XP_003355954.1  PRE   | 1.000 | 1.010 | 0.711 | 0.563 | 1.304 |
| gi 68532157 gb AAAY98813.1  proteasome subunit 10 [Sus scrofa] >gi 68532159 gb AAAY98814.1  proteasome subunit 10 [Sus scrofa]                                                                                                                                                               | 1.000 | 1.961 | 1.767 | 3.009 | 1.305 |
| gi 311244872 ref XP_003121596.1  PREDICTED: creatine kinase U-type, mitochondrial-like isoform 2 [Sus scrofa] >gi 311244870 ref XP_003121595.1  PREDICTED: creatine kinase U-type, mitochondrial-like isoform 1 [Sus scrofa]                                                                 | 1.000 | 1.676 | 1.552 | 1.153 | 1.306 |
| gi 311276184 ref XP_003135086.1  PREDICTED: FUN14 domain-containing protein 1-like [Sus scrofa]                                                                                                                                                                                              | 1.000 | 0.718 | 1.337 | 1.354 | 1.308 |
| gi 346421435 ref NP_001231091.1  sorbitol dehydrogenase [Sus scrofa]                                                                                                                                                                                                                         | 1.000 | 1.724 | 1.163 | 0.884 | 1.309 |
| gi 122131841 sp Q06A98.1 SRSF2_PIG RecName: Full=Serine/arginine-rich splicing factor 2; AltName: Full=Splicing component, 35 kDa; AltName: Full=Splicing factor SC35; Short=SC-35; AltName: Full=Splicing factor, arginine/serine-rich 2 >gi 116175283 ref NP_001070697.1  serine/arginine- | 1.000 | 1.196 | 1.380 | 1.786 | 1.313 |
| gi 389618965 gb AFK92990.1  U2 small nuclear                                                                                                                                                                                                                                                 | 1.000 | 1.303 | 1.058 | 1.085 | 1.315 |

|                                                                                                                                                                                                                                                                                                            |       |       |       |       |       |
|------------------------------------------------------------------------------------------------------------------------------------------------------------------------------------------------------------------------------------------------------------------------------------------------------------|-------|-------|-------|-------|-------|
| RNA auxiliary factor 2 [Sus scrofa]                                                                                                                                                                                                                                                                        |       |       |       |       |       |
| gi 335282599 ref XP_003123290.2 <br>PREDICTED: interleukin enhancer-binding<br>factor 3 [Sus scrofa]                                                                                                                                                                                                       | 1.000 | 1.011 | 1.226 | 1.104 | 1.319 |
| gi 335281715 ref XP_003122673.2 <br>PREDICTED: L-asparaginase-like [Sus scrofa]                                                                                                                                                                                                                            | 1.000 | 1.844 | 2.260 | 2.082 | 1.320 |
| gi 312062797 ref NP_001185848.1  proactivator<br>polypeptide precursor [Sus<br>scrofa] >gi 310789269 gb ADP24688.1 <br>prosaposin variant 2 [Sus scrofa]                                                                                                                                                   | 1.000 | 0.731 | 2.233 | 2.259 | 1.324 |
| gi 335302965 ref XP_001925033.2 <br>PREDICTED: lupus La protein homolog [Sus<br>scrofa]                                                                                                                                                                                                                    | 1.000 | 1.032 | 0.677 | 0.571 | 1.326 |
| gi 346644874 ref NP_001231109.1  T-complex<br>protein 1 subunit gamma [Sus scrofa]                                                                                                                                                                                                                         | 1.000 | 1.406 | 0.959 | 0.898 | 1.328 |
| gi 343790856 ref NP_001230567.1  glutathione<br>transferase zeta 1 [Sus scrofa]                                                                                                                                                                                                                            | 1.000 | 1.644 | 0.741 | 0.595 | 1.333 |
| gi 268607671 ref NP_001161267.1  actin, alpha<br>skeletal muscle [Sus<br>scrofa] >gi 62287931 sp P68137.1 ACTS_PIG<br>RecName: Full=Actin, alpha skeletal muscle;<br>AltName: Full=Alpha-actin-1; Flags:<br>Precursor >gi 790202 gb AAC48692.1  skeletal<br>alpha actin [Sus scrofa]                       | 1.000 | 1.216 | 0.517 | 0.418 | 1.334 |
| gi 350585579 ref XP_003481996.1 <br>PREDICTED: alpha-enolase-like, partial [Sus<br>scrofa]                                                                                                                                                                                                                 | 1.000 | 1.597 | 1.466 | 1.565 | 1.341 |
| gi 350577999 ref XP_001928755.4 <br>PREDICTED: ezrin-like [Sus scrofa]                                                                                                                                                                                                                                     | 1.000 | 1.848 | 0.828 | 1.314 | 1.341 |
| gi 47523870 ref NP_999573.1  peroxiredoxin-6<br>[Sus<br>scrofa] >gi 75074817 sp Q9TSX9.3 PRDX6_PIG<br>RecName: Full=Peroxiredoxin-6; AltName:<br>Full=Non-selenium glutathione peroxidase;<br>Short=NSGPx >gi 6689393 emb CAB65456.1 <br>non-selenium glutathione phospholipid<br>hydroperoxide peroxidase | 1.000 | 1.132 | 2.008 | 1.577 | 1.343 |
| gi 350593430 ref XP_003483683.1 <br>PREDICTED: glutathione reductase,<br>mitochondrial isoform 1 [Sus scrofa]                                                                                                                                                                                              | 1.000 | 0.713 | 1.184 | 1.473 | 1.349 |
| gi 335280672 ref XP_003353634.1 <br>PREDICTED: aldehyde dehydrogenase X,<br>mitochondrial [Sus scrofa]                                                                                                                                                                                                     | 1.000 | 1.944 | 0.802 | 0.591 | 1.353 |

|                                                                                                                                                                                                                                                                                                |       |       |       |       |       |
|------------------------------------------------------------------------------------------------------------------------------------------------------------------------------------------------------------------------------------------------------------------------------------------------|-------|-------|-------|-------|-------|
| gi 55583761 sp Q64L94.1 PSME1_PIG<br>RecName: Full=Proteasome activator complex subunit 1; AltName: Full=Proteasome activator 28 subunit alpha; Short=PA28a; Short=PA28alpha >gi 34978646 gb AAQ83574.1  proteasome activator 28 alpha subunit [Sus scrofa]                                    | 1.000 | 1.531 | 1.257 | 1.253 | 1.363 |
| gi 335281676 ref XP_003353867.1 <br>PREDICTED: heterogeneous nuclear ribonucleoprotein U-like 2 [Sus scrofa]                                                                                                                                                                                   | 1.000 | 1.432 | 0.889 | 1.030 | 1.367 |
| gi 335299026 ref XP_003132223.2 <br>PREDICTED: microtubule-associated protein 4-like [Sus scrofa]                                                                                                                                                                                              | 1.000 | 0.901 | 1.857 | 1.532 | 1.377 |
| gi 555827 gb AAA65943.1  immunoglobulin alpha heavy chain constant region, partial [Sus scrofa] >gi 2136551 pir  I47175 Ig alpha chain C region - pig (fragment)                                                                                                                               | 1.000 | 0.720 | 0.817 | 1.044 | 1.378 |
| gi 350587586 ref XP_003129077.3 <br>PREDICTED: hypothetical protein LOC100522154 [Sus scrofa]                                                                                                                                                                                                  | 1.000 | 1.027 | 1.932 | 2.369 | 1.379 |
| gi 120968 sp P80147.2 GABT_PIG RecName: Full=4-aminobutyrate aminotransferase, mitochondrial; AltName: Full=(S)-3-amino-2-methylpropionate transaminase; AltName: Full=GABA aminotransferase; Short=GABA-AT; AltName: Full=Gamma-amino-N-butyrate transaminase; Short=GABA transaminase;       | 1.000 | 1.695 | 0.783 | 0.717 | 1.390 |
| gi 62511144 sp Q764M5.1 STAT1_PIG<br>RecName: Full=Signal transducer and activator of transcription 1 >gi 47523306 ref NP_998934.1  signal transducer and activator of transcription 1 [Sus scrofa] >gi 40363629 dbj BAD06318.1  signal transducer and activator of transcription 1 [Sus scrof | 1.000 | 1.669 | 1.216 | 1.570 | 1.391 |
| gi 335309657 ref XP_003361720.1 <br>PREDICTED: 14-3-3 protein epsilon-like [Sus scrofa]                                                                                                                                                                                                        | 1.000 | 1.488 | 0.899 | 0.780 | 1.393 |
| gi 335289143 ref XP_003126912.2 <br>PREDICTED: probable D-lactate dehydrogenase, mitochondrial [Sus scrofa]                                                                                                                                                                                    | 1.000 | 1.998 | 1.083 | 2.112 | 1.394 |
| gi 346644844 ref NP_001231177.1 <br>phosphotriesterase-related protein [Sus scrofa]                                                                                                                                                                                                            | 1.000 | 1.138 | 2.160 | 2.467 | 1.396 |

|                                                                                                                                                                                                                                                                                             |       |       |       |       |       |
|---------------------------------------------------------------------------------------------------------------------------------------------------------------------------------------------------------------------------------------------------------------------------------------------|-------|-------|-------|-------|-------|
| gi 345441750 ref NP_001230836.1  heat shock 70kDa protein 8 [Sus scrofa]                                                                                                                                                                                                                    | 1.000 | 1.383 | 0.961 | 0.980 | 1.398 |
| gi 311271975 ref XP_001926332.2  PREDICTED: short/branched chain specific acyl-CoA dehydrogenase, mitochondrial [Sus scrofa]                                                                                                                                                                | 1.000 | 1.307 | 0.714 | 0.940 | 1.408 |
| gi 350580243 ref XP_003123005.3  PREDICTED: harmonin-like [Sus scrofa]                                                                                                                                                                                                                      | 1.000 | 0.886 | 2.100 | 1.767 | 1.414 |
| gi 197251934 ref NP_001127826.1  actin-related protein 2 [Sus scrofa] >gi 195562213 gb ACG50178.1  actin-related protein 2-like protein [Sus scrofa]                                                                                                                                        | 1.000 | 1.397 | 0.500 | 0.574 | 1.417 |
| gi 350591605 ref XP_003483304.1  PREDICTED: plastin-1-like [Sus scrofa]                                                                                                                                                                                                                     | 1.000 | 1.460 | 1.001 | 0.985 | 1.418 |
| gi 346716348 ref NP_001231189.1  arginine--tRNA ligase, cytoplasmic [Sus scrofa]                                                                                                                                                                                                            | 1.000 | 1.610 | 0.986 | 0.841 | 1.429 |
| gi 47523086 ref NP_999309.1  peroxiredoxin-5, mitochondrial [Sus scrofa] >gi 10305336 gb AAG13452.2 AF110735_1 peroxiredoxin 5 [Sus scrofa]                                                                                                                                                 | 1.000 | 1.866 | 0.912 | 0.881 | 1.432 |
| gi 297591979 ref NP_001172070.1  ornithine aminotransferase, mitochondrial [Sus scrofa] >gi 166244455 gb ABY86572.1  mitochondrial ornithine aminotransferase [Sus scrofa]                                                                                                                  | 1.000 | 1.701 | 1.067 | 0.856 | 1.434 |
| gi 56788496 gb AAW29969.1  unknown [Sus scrofa] >gi 56792880 gb AAW30632.1  unknown [Sus scrofa]                                                                                                                                                                                            | 1.000 | 0.647 | 1.212 | 0.768 | 1.437 |
| gi 47117721 sp P83884.2 RL36A_PIG RecName: Full=60S ribosomal protein L36a; AltName: Full=60S ribosomal protein L44 >gi 47522650 ref NP_999082.1  60S ribosomal protein L36a [Sus scrofa] >gi 335303998 ref XP_003134062.2  PREDICTED: 60S ribosomal protein L36a-like [Sus scrofa] >gi 335 | 1.000 | 1.132 | 0.672 | 0.743 | 1.439 |
| gi 1170740 sp P00339.3 LDHA_PIG RecName: Full=L-lactate dehydrogenase A chain; Short=LDH-A; AltName: Full=LDH muscle subunit; Short=LDH-M >gi 473571 gb AAA50436.1  lactate dehydrogenase-A [Sus scrofa domesticus]                                                                         | 1.000 | 1.799 | 0.825 | 0.705 | 1.440 |
| gi 118403852 ref NP_001072139.1  UBC1 [Sus                                                                                                                                                                                                                                                  | 1.000 | 1.670 | 1.155 | 1.259 | 1.448 |

|                                                                                                                                                                                                                                                                                            |       |       |       |       |       |
|--------------------------------------------------------------------------------------------------------------------------------------------------------------------------------------------------------------------------------------------------------------------------------------------|-------|-------|-------|-------|-------|
| scrofa] >gi 115371727 gb ABI96188.1  UBC1 [Sus scrofa]                                                                                                                                                                                                                                     |       |       |       |       |       |
| gi 311254260 ref XP_001929592.2  PREDICTED: interleukin enhancer-binding factor 2 [Sus scrofa]                                                                                                                                                                                             | 1.000 | 1.471 | 1.176 | 0.872 | 1.452 |
| gi 155369760 ref NP_001094498.1  peroxisomal acyl-coenzyme A oxidase 1 [Sus scrofa] >gi 112292673 gb ABI14815.1  palmitoyl acyl-CoA oxidase 1 [Sus scrofa]                                                                                                                                 | 1.000 | 1.021 | 0.945 | 1.126 | 1.452 |
| gi 194038542 ref XP_001929208.1  PREDICTED: methylmalonate-semialdehyde dehydrogenase [acylating], mitochondrial [Sus scrofa]                                                                                                                                                              | 1.000 | 1.593 | 0.928 | 0.929 | 1.458 |
| gi 335296662 ref XP_003130891.2  PREDICTED: 6-phosphofructokinase type C [Sus scrofa]                                                                                                                                                                                                      | 1.000 | 1.462 | 0.995 | 1.326 | 1.464 |
| gi 194036227 ref XP_001929678.1  PREDICTED: selenium-binding protein 1 [Sus scrofa]                                                                                                                                                                                                        | 1.000 | 1.132 | 1.756 | 2.005 | 1.465 |
| gi 311248177 ref XP_003123013.1  PREDICTED: proteasome subunit alpha type-1-like [Sus scrofa]                                                                                                                                                                                              | 1.000 | 0.627 | 1.485 | 1.428 | 1.467 |
| gi 350591320 ref XP_003132344.3  PREDICTED: 26S proteasome non-ATPase regulatory subunit 6 [Sus scrofa]                                                                                                                                                                                    | 1.000 | 1.844 | 1.187 | 0.979 | 1.468 |
| gi 51592135 ref NP_001004043.1  cofilin-1 [Sus scrofa] >gi 116850 sp P10668.3 COF1_PIG RecName: Full=Cofilin-1; AltName: Full=Cofilin, non-muscle isoform >gi 164425 gb AAA31020.1  cofilin [Sus scrofa]                                                                                   | 1.000 | 1.814 | 1.452 | 0.952 | 1.469 |
| gi 113205888 ref NP_001038076.1  aldehyde dehydrogenase, mitochondrial precursor [Sus scrofa] >gi 122138098 sp Q2XQV4.1 ALDH2_PIG RecName: Full=Aldehyde dehydrogenase, mitochondrial; AltName: Full=ALDH class 2; AltName: Full=ALDH-E2; Flags: Precursor >gi 81295909 gb ABB70228.1  mit | 1.000 | 1.732 | 0.778 | 0.734 | 1.475 |
| gi 194034199 ref XP_001928042.1  PREDICTED: proteasome subunit alpha type-3 isoform 2 [Sus scrofa]                                                                                                                                                                                         | 1.000 | 1.080 | 2.055 | 1.906 | 1.477 |
| gi 45268975 gb AAS55900.1  60S ribosomal protein L11, partial [Sus scrofa]                                                                                                                                                                                                                 | 1.000 | 2.079 | 1.202 | 2.070 | 1.478 |



|                                                                                                                                                                                                           |       |       |       |       |       |
|-----------------------------------------------------------------------------------------------------------------------------------------------------------------------------------------------------------|-------|-------|-------|-------|-------|
| gi 350595271 ref XP_003134762.3 <br>PREDICTED: hypothetical protein<br>LOC100521760 [Sus scrofa]                                                                                                          | 1.000 | 1.787 | 1.246 | 1.200 | 1.484 |
| gi 12055551 emb CAC21172.1  diazepam<br>binding inhibitor [Sus scrofa]                                                                                                                                    | 1.000 | 1.667 | 2.489 | 2.516 | 1.486 |
| gi 350587882 ref XP_003129304.3 <br>PREDICTED: caspase-6-like [Sus scrofa]                                                                                                                                | 1.000 | 0.925 | 2.035 | 1.475 | 1.488 |
| gi 311255145 ref XP_001926338.2 <br>PREDICTED: thiosulfate sulfurtransferase [Sus<br>scrofa]                                                                                                              | 1.000 | 1.947 | 0.819 | 1.357 | 1.494 |
| gi 89573899 gb ABD77175.1  ribosomal protein<br>L18 [Sus scrofa]                                                                                                                                          | 1.000 | 0.920 | 0.907 | 0.779 | 1.498 |
| gi 47523670 ref NP_999471.1  peroxisomal<br>multifunctional enzyme type 2 [Sus<br>scrofa] >gi 499340 emb CAA55037.1 <br>17beta-estradiol dehydrogenase [Sus scrofa]                                       | 1.000 | 1.407 | 1.131 | 1.217 | 1.501 |
| gi 194018698 ref NP_001123442.1  cytochrome c<br>[Sus<br>scrofa] >gi 119388070 sp P62895.2 CYC_PIG<br>RecName: Full=Cytochrome<br>c >gi 62208258 gb AAX77008.1  cytochrome<br>c-like protein [Sus scrofa] | 1.000 | 1.081 | 2.968 | 2.164 | 1.501 |
| gi 335300802 ref XP_003359038.1 <br>PREDICTED: 6-phosphofructokinase, liver<br>type-like [Sus scrofa]                                                                                                     | 1.000 | 1.026 | 0.859 | 0.933 | 1.510 |
| gi 283993079 gb ADB57036.1  L-gulonate<br>3-dehydrogenase [Sus scrofa]                                                                                                                                    | 1.000 | 2.065 | 0.888 | 1.278 | 1.510 |
| gi 47169449 pdb 1VJD A Chain A, Structure Of<br>Pig Muscle Pkg Complexed With<br>Atp >gi 47169448 pdb 1VJC A Chain A,<br>Structure Of Pig Muscle Pkg Complexed With<br>Mgatp                              | 1.000 | 1.879 | 0.606 | 0.764 | 1.515 |
| gi 350579323 ref XP_003122006.3 <br>PREDICTED: retinal dehydrogenase 1-like,<br>partial [Sus scrofa]                                                                                                      | 1.000 | 1.350 | 1.241 | 1.953 | 1.515 |
| gi 335293690 ref XP_003129163.2 <br>PREDICTED: general vesicular transport factor<br>p115-like [Sus scrofa]                                                                                               | 1.000 | 0.836 | 2.522 | 2.176 | 1.516 |
| gi 346986445 ref NP_001231372.1  NSFL1 (p97)<br>cofactor (p47) [Sus scrofa]                                                                                                                               | 1.000 | 1.188 | 1.880 | 1.872 | 1.520 |
| gi 47523818 ref NP_999546.1 <br>calcium/calmodulin-dependent protein kinase                                                                                                                               | 1.000 | 1.253 | 1.013 | 0.852 | 1.523 |

|                                                                                                                                                                                                                  |       |       |       |       |       |
|------------------------------------------------------------------------------------------------------------------------------------------------------------------------------------------------------------------|-------|-------|-------|-------|-------|
| type II subunit delta [Sus scrofa] >gi 75073672 sp Q95266.1 KCC2D_PIG<br>RecName: Full=Calcium/calmodulin-dependent protein kinase type II subunit delta; Short=CaM kinase II subunit delta; Short=CaMK-II subun |       |       |       |       |       |
| gi 350592964 ref XP_003483582.1 <br>PREDICTED: PDZ and LIM domain protein 1 [Sus scrofa]                                                                                                                         | 1.000 | 1.389 | 2.467 | 2.281 | 1.529 |
| gi 350590394 ref XP_003131590.3 <br>PREDICTED: pyridoxine-5~-phosphate oxidase-like [Sus scrofa]                                                                                                                 | 1.000 | 1.599 | 2.451 | 2.121 | 1.531 |
| gi 330417958 ref NP_001155225.1 <br>phosphoenolpyruvate carboxykinase [GTP], mitochondrial [Sus scrofa] >gi 238863892 gb ACR66222.1 <br>phosphoenolpyruvate carboxykinase 2 [Sus scrofa]                         | 1.000 | 2.689 | 1.250 | 0.996 | 1.532 |
| gi 350593418 ref XP_003359535.2 <br>PREDICTED: hypothetical protein LOC100627320 [Sus scrofa]                                                                                                                    | 1.000 | 1.522 | 1.994 | 2.167 | 1.535 |
| gi 116175259 ref NP_001070686.1 <br>heterogeneous nuclear ribonucleoprotein A1 [Sus scrofa] >gi 115371763 gb ABI96206.1  ROA1 [Sus scrofa]                                                                       | 1.000 | 1.325 | 0.865 | 0.712 | 1.539 |
| gi 356460899 ref NP_999466.2  catalase [Sus scrofa]                                                                                                                                                              | 1.000 | 0.830 | 1.677 | 1.644 | 1.541 |
| gi 118403904 ref NP_001072131.1  protein DJ-1 [Sus scrofa] >gi 67038668 gb AAY63803.1  DJ-1 protein [Sus scrofa]                                                                                                 | 1.000 | 1.060 | 2.156 | 1.948 | 1.543 |
| gi 255683394 ref NP_001157474.1  ornithine carbamoyltransferase, mitochondrial [Sus scrofa]                                                                                                                      | 1.000 | 0.910 | 1.058 | 1.682 | 1.552 |
| gi 219522018 ref NP_001137196.1  Na(+)/H(+) exchange regulatory cofactor NHE-RF1 [Sus scrofa] >gi 217031226 gb ACJ74160.1  solute carrier family 9 (sodium/hydrogen exchanger) member 3 regulator 1 [Sus scrofa] | 1.000 | 1.571 | 2.608 | 2.407 | 1.557 |
| gi 346716265 ref NP_001231271.1 <br>omega-amidase NIT2 [Sus scrofa]                                                                                                                                              | 1.000 | 1.536 | 1.113 | 0.832 | 1.558 |
| gi 194035831 ref XP_001928742.1 <br>PREDICTED: coatomer subunit alpha isoform 2 [Sus scrofa]                                                                                                                     | 1.000 | 1.561 | 1.003 | 0.878 | 1.562 |
| gi 343780946 ref NP_001230486.1 <br>D-dopachrome decarboxylase [Sus scrofa]                                                                                                                                      | 1.000 | 1.248 | 1.873 | 1.422 | 1.566 |

|                                                                                                                                                                                                                                                                                         |       |       |       |       |       |
|-----------------------------------------------------------------------------------------------------------------------------------------------------------------------------------------------------------------------------------------------------------------------------------------|-------|-------|-------|-------|-------|
| gi 312062805 ref NP_001185852.1  chloride intracellular channel protein 5 [Sus scrofa] >gi 197361201 gb ACH70136.1  chloride intracellular channel 5 [Sus scrofa]                                                                                                                       | 1.000 | 2.034 | 0.871 | 1.000 | 1.572 |
| gi 194037373 ref XP_001927584.1  PREDICTED: coatomer subunit zeta-1 isoform 1 [Sus scrofa]                                                                                                                                                                                              | 1.000 | 1.781 | 1.371 | 1.598 | 1.578 |
| gi 194040624 ref XP_001929173.1  PREDICTED: plastin-2 isoform 1 [Sus scrofa]                                                                                                                                                                                                            | 1.000 | 1.786 | 1.252 | 1.164 | 1.583 |
| gi 350591042 ref XP_003132145.3  PREDICTED: programmed cell death 6-interacting protein [Sus scrofa]                                                                                                                                                                                    | 1.000 | 1.284 | 0.954 | 1.220 | 1.590 |
| gi 335310692 ref XP_003362151.1  PREDICTED: protein LZIC-like [Sus scrofa]                                                                                                                                                                                                              | 1.000 | 1.219 | 2.177 | 2.930 | 1.599 |
| gi 335309939 ref XP_003133770.2  PREDICTED: nucleolin-like [Sus scrofa]                                                                                                                                                                                                                 | 1.000 | 1.089 | 1.648 | 1.607 | 1.599 |
| gi 47523784 ref NP_999528.1  40S ribosomal protein S12 [Sus scrofa] >gi 1173191 sp P46405.2 RS12_PIG RecName: Full=40S ribosomal protein S12 >gi 872315 emb CAA55946.1  40S ribosomal protein S12 [Sus scrofa]                                                                          | 1.000 | 0.974 | 1.068 | 0.878 | 1.607 |
| gi 335282345 ref XP_003354038.1  PREDICTED: mitochondrial import inner membrane translocase subunit Tim13-like [Sus scrofa]                                                                                                                                                             | 1.000 | 1.780 | 2.187 | 2.239 | 1.616 |
| gi 21954744 gb AAM83105.1 AF525487_1 Ran [Sus scrofa]                                                                                                                                                                                                                                   | 1.000 | 1.757 | 0.822 | 0.618 | 1.618 |
| gi 348605274 ref NP_001231762.1  alcohol dehydrogenase 5 (class III), chi polypeptide [Sus scrofa]                                                                                                                                                                                      | 1.000 | 1.887 | 0.872 | 0.792 | 1.618 |
| gi 112985 sp P00506.2 AATM_PIG RecName: Full=Aspartate aminotransferase, mitochondrial; Short=mAspAT; AltName: Full=Fatty acid-binding protein; Short=FABP-1; AltName: Full=Glutamate oxaloacetate transaminase 2; AltName: Full=Plasma membrane-associated fatty acid-binding protein; | 1.000 | 1.009 | 1.728 | 2.191 | 1.620 |
| gi 350592969 ref XP_003483583.1  PREDICTED: phosphoglycerate mutase 1-like [Sus scrofa]                                                                                                                                                                                                 | 1.000 | 1.569 | 0.987 | 1.190 | 1.621 |
| gi 335292272 ref XP_003356696.1  PREDICTED: fumarylacetoacetase-like [Sus                                                                                                                                                                                                               | 1.000 | 1.473 | 3.380 | 2.688 | 1.629 |

|                                                                                                                                                                                                                                                                                                             |       |       |       |       |       |
|-------------------------------------------------------------------------------------------------------------------------------------------------------------------------------------------------------------------------------------------------------------------------------------------------------------|-------|-------|-------|-------|-------|
| scrofa]                                                                                                                                                                                                                                                                                                     |       |       |       |       |       |
| gi 122064241 sp Q06AT0.3 HPCL1_PIG<br>RecName: Full=Hippocalcin-like protein<br>1 >gi 178056468 ref NP_001116598.1 <br>hippocalcin-like protein 1 [Sus<br>scrofa] >gi 115394792 gb ABI97190.1  HPCL1<br>[Sus scrofa]                                                                                        | 1.000 | 1.122 | 1.907 | 2.156 | 1.642 |
| gi 350582722 ref XP_003481338.1 <br>PREDICTED: 14-3-3 protein theta isoform 1<br>[Sus scrofa]                                                                                                                                                                                                               | 1.000 | 1.696 | 1.369 | 1.297 | 1.659 |
| gi 335294002 ref XP_003357106.1 <br>PREDICTED: 3-hydroxybutyrate dehydrogenase<br>type 2-like isoform 2 [Sus<br>scrofa] >gi 335294000 ref XP_003129333.2 <br>PREDICTED: 3-hydroxybutyrate dehydrogenase<br>type 2-like isoform 1 [Sus scrofa]                                                               | 1.000 | 2.360 | 0.622 | 0.791 | 1.663 |
| gi 335297787 ref XP_003131575.2 <br>PREDICTED: puromycin-sensitive<br>aminopeptidase isoform 1 [Sus scrofa]                                                                                                                                                                                                 | 1.000 | 1.467 | 0.977 | 0.697 | 1.664 |
| gi 211578376 ref NP_001129984.1 <br>beta,beta-carotene 15,15~-monooxygenase [Sus<br>scrofa] >gi 209571749 gb ACI62530.1 <br>beta-carotene 15,15~-monooxygenase 1 [Sus<br>scrofa]                                                                                                                            | 1.000 | 1.281 | 1.155 | 1.164 | 1.667 |
| gi 239977642 sp Q29183.1 TFF3_PIG RecName:<br>Full=Trefoil factor 3; AltName: Full=Intestinal<br>trefoil factor; Flags: Precursor                                                                                                                                                                           | 1.000 | 0.853 | 4.328 | 3.069 | 1.667 |
| gi 47523516 ref NP_999381.1  inositol<br>monophosphatase 1 [Sus<br>scrofa] >gi 68568737 sp O77591.1 IMPA1_PIG<br>RecName: Full=Inositol monophosphatase 1;<br>Short=IMP 1; Short=IMPase 1; AltName:<br>Full=Inositol-1(or 4)-monophosphatase 1;<br>AltName: Full=Lithium-sensitive myo-inositol<br>monophos | 1.000 | 1.006 | 2.592 | 2.528 | 1.676 |
| gi 297591965 ref NP_001172061.1  leukotriene<br>A-4 hydrolase [Sus<br>scrofa] >gi 262204898 dbj BAI48029.1 <br>leukotriene A4 hydrolase [Sus scrofa]                                                                                                                                                        | 1.000 | 1.816 | 0.956 | 0.872 | 1.682 |
| gi 47522738 ref NP_999119.1  aconitate<br>hydratase, mitochondrial precursor [Sus<br>scrofa] >gi 113159 sp P16276.1 ACON_PIG<br>RecName: Full=Aconitate hydratase,                                                                                                                                          | 1.000 | 1.770 | 1.054 | 1.058 | 1.686 |

|                                                                                                                                                                                                                                                    |       |       |       |       |       |
|----------------------------------------------------------------------------------------------------------------------------------------------------------------------------------------------------------------------------------------------------|-------|-------|-------|-------|-------|
| mitochondrial; Short=Aconitase; AltName:<br>Full=Citrate hydro-lyase; Flags:<br>Precursor >gi 164315 gb AAA30987.1  heart<br>aconitas                                                                                                              |       |       |       |       |       |
| gi 345441801 ref NP_001230874.1  TNF<br>receptor-associated protein 1 [Sus scrofa]                                                                                                                                                                 | 1.000 | 1.932 | 0.894 | 0.943 | 1.689 |
| gi 84028320 sp Q9GKX6.1 GALM_PIG<br>RecName: Full=Aldose 1-epimerase; AltName:<br>Full=Galactose<br>mutarotase >gi 47523866 ref NP_999571.1 <br>aldose 1-epimerase [Sus<br>scrofa] >gi 11611545 dbj BAB18973.1  aldose<br>1-epimerase [Sus scrofa] | 1.000 | 1.501 | 0.864 | 0.931 | 1.695 |
| gi 335305925 ref XP_003135119.2 <br>PREDICTED: LOW QUALITY PROTEIN:<br>ubiquitin-like modifier activating enzyme 1 [Sus<br>scrofa]                                                                                                                 | 1.000 | 1.971 | 0.991 | 0.967 | 1.697 |
| gi 1352666 sp P11493.2 PP2AB_PIG RecName:<br>Full=Serine/threonine-protein phosphatase 2A<br>catalytic subunit beta isoform;<br>Short=PP2A-beta >gi 164298 gb AAA30982.1 <br>protein phosphatase 2A beta subunit, partial [Sus<br>scrofa]          | 1.000 | 2.065 | 1.224 | 0.936 | 1.719 |
| gi 194044626 ref XP_001927289.1 <br>PREDICTED: 14-3-3 protein beta/alpha isoform<br>1 [Sus scrofa]                                                                                                                                                 | 1.000 | 2.234 | 1.272 | 0.948 | 1.724 |
| gi 311250943 ref XP_003124353.1 <br>PREDICTED: 28 kDa heat- and acid-stable<br>phosphoprotein-like [Sus scrofa]                                                                                                                                    | 1.000 | 0.855 | 1.997 | 1.660 | 1.733 |
| gi 347543782 ref NP_001231554.1  glutathione<br>synthetase [Sus scrofa]                                                                                                                                                                            | 1.000 | 1.749 | 1.676 | 2.554 | 1.735 |
| gi 162951821 ref NP_001106165.1 <br>heterogeneous nuclear ribonucleoprotein A/B<br>[Sus scrofa] >gi 160858224 dbj BAF93845.1 <br>CArG-binding factor A [Sus scrofa]                                                                                | 1.000 | 0.998 | 2.227 | 1.941 | 1.736 |
| gi 311268173 ref XP_003131919.1 <br>PREDICTED: myb-binding protein 1A [Sus<br>scrofa]                                                                                                                                                              | 1.000 | 0.608 | 2.053 | 1.081 | 1.739 |
| gi 71361861 gb AAZ30034.1  Mx1 [Sus scrofa]                                                                                                                                                                                                        | 1.000 | 0.967 | 1.069 | 0.893 | 1.743 |
| gi 47522916 ref NP_999215.1  glutathione<br>S-transferase omega-1 [Sus<br>scrofa] >gi 20141290 sp Q9N1F5.2 GSTO1_PIG<br>RecName: Full=Glutathione S-transferase                                                                                    | 1.000 | 1.410 | 0.791 | 0.625 | 1.755 |

|                                                                                                                                                                                                                                                                                                                     |       |       |       |       |       |
|---------------------------------------------------------------------------------------------------------------------------------------------------------------------------------------------------------------------------------------------------------------------------------------------------------------------|-------|-------|-------|-------|-------|
| omega-1; Short=GSTO-1; AltName:<br>Full=Glutathione S-transferase omega 1-1;<br>Short=GSTO 1-1; AltName:<br>Full=Glutathione-dependent d                                                                                                                                                                            |       |       |       |       |       |
| gi 335310331 ref XP_003361983.1 <br>PREDICTED: poly(U)-binding-splicing factor<br>PUF60-like [Sus scrofa]                                                                                                                                                                                                           | 1.000 | 1.293 | 1.065 | 0.792 | 1.760 |
| gi 52000924 sp Q29238.2 CLIC1_PIG RecName:<br>Full=Chloride intracellular channel protein 1;<br>AltName: Full=Nuclear chloride ion channel 27                                                                                                                                                                       | 1.000 | 1.730 | 0.733 | 0.748 | 1.761 |
| gi 197251946 ref NP_001127815.1  actin-related<br>protein 3 [Sus<br>scrofa] >gi 195562215 gb ACG50179.1 <br>actin-related protein 3-like protein [Sus scrofa]                                                                                                                                                       | 1.000 | 1.498 | 1.237 | 1.031 | 1.763 |
| gi 48675953 ref NP_001001643.1  rab GDP<br>dissociation inhibitor beta [Sus<br>scrofa] >gi 75043802 sp Q6Q7J2.1 GDIB_PIG<br>RecName: Full=Rab GDP dissociation inhibitor<br>beta; Short=Rab GDI beta; AltName:<br>Full=Guanosine diphosphate dissociation<br>inhibitor 2;<br>Short=GDI-2 >gi 45758488 gb AAS76      | 1.000 | 2.866 | 1.102 | 0.916 | 1.781 |
| gi 335281104 ref XP_003353734.1 <br>PREDICTED: argininosuccinate synthase [Sus<br>scrofa]                                                                                                                                                                                                                           | 1.000 | 1.671 | 2.308 | 2.587 | 1.797 |
| gi 194041937 ref XP_001928912.1 <br>PREDICTED: alpha-centractin [Sus scrofa]                                                                                                                                                                                                                                        | 1.000 | 1.787 | 1.406 | 1.284 | 1.802 |
| gi 319401915 ref NP_001188313.1  rho<br>GDP-dissociation inhibitor 1 [Sus<br>scrofa] >gi 315321426 gb ADU04840.1  Rho<br>GDP dissociation inhibitor alpha [Sus scrofa]                                                                                                                                              | 1.000 | 2.584 | 0.973 | 1.127 | 1.810 |
| gi 311277231 ref XP_003135559.1 <br>PREDICTED: trimethyllysine dioxygenase,<br>mitochondrial-like [Sus scrofa]                                                                                                                                                                                                      | 1.000 | 1.143 | 5.553 | 3.922 | 1.817 |
| gi 311252247 ref XP_003124998.1 <br>PREDICTED: macrophage-capping protein-like<br>isoform 4 [Sus<br>scrofa] >gi 311252243 ref XP_003124996.1 <br>PREDICTED: macrophage-capping protein-like<br>isoform 2 [Sus<br>scrofa] >gi 311252249 ref XP_003124997.1 <br>PREDICTED: macrophage-capping protein-like<br>isoform | 1.000 | 1.498 | 2.400 | 4.476 | 1.818 |

|                                                                                                                                                                                                                                                                                                               |       |       |       |       |       |
|---------------------------------------------------------------------------------------------------------------------------------------------------------------------------------------------------------------------------------------------------------------------------------------------------------------|-------|-------|-------|-------|-------|
| gi 311252615 ref XP_003125184.1 <br>PREDICTED: ubiquitin-40S ribosomal protein<br>S27a-like [Sus<br>scrofa] >gi 311252617 ref XP_003125185.1 <br>PREDICTED: ubiquitin-40S ribosomal protein<br>S27a-like [Sus scrofa]                                                                                         | 1.000 | 1.316 | 3.017 | 2.609 | 1.820 |
| gi 350582355 ref XP_003354851.2 <br>PREDICTED: exportin-1 [Sus scrofa]                                                                                                                                                                                                                                        | 1.000 | 2.597 | 2.292 | 1.444 | 1.821 |
| gi 223046 prf 0410468A aminotransferase, Asp                                                                                                                                                                                                                                                                  | 1.000 | 1.169 | 1.787 | 1.918 | 1.829 |
| gi 999620 pdb 1MLD D Chain D, Refined<br>Structure Of Mitochondrial Malate<br>Dehydrogenase From Porcine Heart And The<br>Consensus Structure For Dicarboxylic Acid<br>Oxidoreductases >gi 999618 pdb 1MLD B Chain<br>B, Refined Structure Of Mitochondrial Malate<br>Dehydrogenase From Porcine              | 1.000 | 2.014 | 1.057 | 0.879 | 1.832 |
| gi 311252403 ref XP_003125080.1 <br>PREDICTED: sepiapterin reductase-like [Sus<br>scrofa]                                                                                                                                                                                                                     | 1.000 | 1.394 | 1.350 | 1.971 | 1.837 |
| gi 148237564 ref NP_001090977.1 <br>adenylosuccinate synthetase isozyme 2 [Sus<br>scrofa] >gi 189031715 sp A4Z6H1.1 PURA2_PI<br>G RecName: Full=Adenylosuccinate synthetase<br>isozyme 2; Short=AMPSase 2; Short=AdSS 2;<br>AltName: Full=Adenylosuccinate synthetase,<br>acidic isozyme; AltName: Full=Adeny | 1.000 | 2.151 | 1.756 | 2.876 | 1.842 |
| gi 311253255 ref XP_003125488.1 <br>PREDICTED: alanine aminotransferase 1-like<br>[Sus scrofa]                                                                                                                                                                                                                | 1.000 | 1.108 | 1.782 | 2.460 | 1.848 |
| gi 212549619 ref NP_001131099.1  ERO1-like<br>protein alpha precursor [Sus<br>scrofa] >gi 226741411 sp B6CVD7.1 ERO1A_PI<br>G RecName: Full=ERO1-like protein alpha;<br>Short=ERO1-L; Short=ERO1-L-alpha; AltName:<br>Full=Endoplasmic oxidoreductin-1-like protein;<br>AltName: Full=Oxidoreductin-1-L-alpha | 1.000 | 1.314 | 1.946 | 1.577 | 1.857 |
| gi 335300581 ref XP_003358947.1 <br>PREDICTED: T-complex protein 1 subunit<br>theta-like isoform 1 [Sus scrofa]                                                                                                                                                                                               | 1.000 | 1.545 | 0.974 | 0.794 | 1.863 |
| gi 164414678 emb CAO81735.1  Alternative Pig<br>Liver Esterase [Sus scrofa]                                                                                                                                                                                                                                   | 1.000 | 0.927 | 1.243 | 1.579 | 1.871 |
| gi 311270662 ref XP_003132938.1 <br>PREDICTED:                                                                                                                                                                                                                                                                | 1.000 | 1.826 | 3.013 | 2.036 | 1.876 |

|                                                                                                                                                                                                                                                                                        |       |       |       |       |       |
|----------------------------------------------------------------------------------------------------------------------------------------------------------------------------------------------------------------------------------------------------------------------------------------|-------|-------|-------|-------|-------|
| phosphatidylethanolamine-binding protein 1-like [Sus scrofa]                                                                                                                                                                                                                           |       |       |       |       |       |
| gi 281427370 ref NP_001163993.1  T-complex protein 1 subunit eta [Sus scrofa] >gi 262036937 dbj BAI47603.1  chaperonin containing TCP1, subunit 7 (eta) [Sus scrofa]                                                                                                                   | 1.000 | 1.904 | 0.901 | 0.911 | 1.878 |
| gi 222136590 ref NP_001138373.1  proteasome subunit alpha type-5 [Sus scrofa]                                                                                                                                                                                                          | 1.000 | 1.041 | 2.413 | 2.229 | 1.879 |
| gi 311245810 ref XP_001924714.2  PREDICTED: GTP:AMP phosphotransferase, mitochondrial isoform 1 [Sus scrofa]                                                                                                                                                                           | 1.000 | 1.660 | 0.785 | 1.152 | 1.897 |
| gi 350583020 ref XP_003481419.1  PREDICTED: zinc finger protein 706-like [Sus scrofa]                                                                                                                                                                                                  | 1.000 | 1.271 | 1.945 | 2.395 | 1.900 |
| gi 335288894 ref XP_003126772.2  PREDICTED: ubiquitin-conjugating enzyme E2 N-like [Sus scrofa]                                                                                                                                                                                        | 1.000 | 1.780 | 2.226 | 1.835 | 1.902 |
| gi 347300325 ref NP_001231461.1  dehydrogenase/reductase SDR family member 11 [Sus scrofa]                                                                                                                                                                                             | 1.000 | 2.520 | 1.354 | 1.392 | 1.907 |
| gi 350578507 ref XP_003121503.3  PREDICTED: asparaginyl-tRNA synthetase, cytoplasmic-like [Sus scrofa]                                                                                                                                                                                 | 1.000 | 1.923 | 1.266 | 1.484 | 1.920 |
| gi 47523456 ref NP_999349.1  serine/threonine-protein phosphatase PP1-beta catalytic subunit [Sus scrofa] >gi 47116968 sp P61292.3 PP1B_PIG RecName: Full=Serine/threonine-protein phosphatase PP1-beta catalytic subunit; Short=PP-1B >gi 89257972 gb ABD65256.1  protein phosphatase | 1.000 | 1.843 | 1.251 | 1.257 | 1.937 |
| gi 195539476 ref NP_001124208.1  bifunctional purine biosynthesis protein PURH [Sus scrofa] >gi 192383834 gb ACF04802.1  5-aminoimidazole-4-carboxamide ribonucleotide formyltransferase/IMP cyclohydrolase [Sus scrofa]                                                               | 1.000 | 1.674 | 0.855 | 1.284 | 1.949 |
| gi 350582612 ref XP_003481312.1  PREDICTED: protein phosphatase 1G-like [Sus scrofa]                                                                                                                                                                                                   | 1.000 | 1.641 | 2.347 | 2.165 | 1.949 |
| gi 335282386 ref XP_003354050.1  PREDICTED: elongation factor 2 [Sus scrofa]                                                                                                                                                                                                           | 1.000 | 1.833 | 1.100 | 0.974 | 1.955 |



|                                                                                                                                                                                                                                                                                                           |       |       |       |       |       |
|-----------------------------------------------------------------------------------------------------------------------------------------------------------------------------------------------------------------------------------------------------------------------------------------------------------|-------|-------|-------|-------|-------|
| gi 335293373 ref XP_003356947.1 <br>PREDICTED: UDP-glucose<br>6-dehydrogenase-like isoform 1 [Sus scrofa]                                                                                                                                                                                                 | 1.000 | 1.734 | 1.612 | 1.136 | 1.981 |
| gi 311273061 ref XP_001925202.2 <br>PREDICTED: villin 1 [Sus scrofa]                                                                                                                                                                                                                                      | 1.000 | 1.437 | 1.059 | 0.998 | 1.990 |
| gi 122114359 gb AA42145.2  cathepsin D [Sus<br>scrofa]                                                                                                                                                                                                                                                    | 1.000 | 1.729 | 1.191 | 1.125 | 1.992 |
| gi 345199288 ref NP_001230831.1  protein<br>phosphatase 1, regulatory (inhibitor) subunit 7<br>[Sus scrofa]                                                                                                                                                                                               | 1.000 | 1.888 | 1.653 | 0.854 | 2.001 |
| gi 346986388 ref NP_001231345.1  profilin-1<br>[Sus scrofa]                                                                                                                                                                                                                                               | 1.000 | 2.107 | 1.375 | 1.305 | 2.004 |
| gi 350596362 ref XP_003361090.2 <br>PREDICTED: CD2-associated protein-like [Sus<br>scrofa]                                                                                                                                                                                                                | 1.000 | 1.357 | 5.830 | 3.915 | 2.031 |
| gi 350586543 ref XP_003482212.1 <br>PREDICTED: glutamate--cysteine ligase<br>catalytic subunit isoform 2 [Sus scrofa]                                                                                                                                                                                     | 1.000 | 2.588 | 1.351 | 1.762 | 2.034 |
| gi 350585077 ref XP_003481871.1 <br>PREDICTED: hypothetical protein<br>LOC100739300 [Sus scrofa]                                                                                                                                                                                                          | 1.000 | 0.914 | 1.823 | 1.807 | 2.044 |
| gi 335309827 ref XP_003361787.1 <br>PREDICTED: nuclear autoantigenic sperm<br>protein, partial [Sus scrofa]                                                                                                                                                                                               | 1.000 | 1.435 | 2.468 | 1.368 | 2.088 |
| gi 47523618 ref NP_999441.1  citrate synthase,<br>mitochondrial precursor [Sus<br>scrofa] >gi 116470 sp P00889.2 CISY_PIG<br>RecName: Full=Citrate synthase, mitochondrial;<br>Flags: Precursor >gi 164419 gb AAA31017.1 <br>citrate synthase precursor (EC 4.1.3.7) [Sus<br>scrofa]                      | 1.000 | 2.016 | 0.966 | 1.408 | 2.124 |
| gi 112976 sp P00503.3 AATC_PIG RecName:<br>Full=Aspartate aminotransferase, cytoplasmic;<br>AltName: Full=Glutamate oxaloacetate<br>transaminase 1; AltName: Full=Transaminase<br>A >gi 47522636 ref NP_999092.1  aspartate<br>aminotransferase, cytoplasmic [Sus<br>scrofa] >gi 300557343 emb CBV09643.1 | 1.000 | 1.113 | 2.697 | 3.518 | 2.144 |
| gi 262072939 dbj BAI47777.1  CCHC-type zinc<br>finger, nucleic acid binding protein [Sus scrofa]                                                                                                                                                                                                          | 1.000 | 1.380 | 2.221 | 1.925 | 2.168 |
| gi 35384836 gb AAQ84564.1  electron transfer<br>flavoprotein alpha subunit precursor [Sus scrofa]                                                                                                                                                                                                         | 1.000 | 2.734 | 1.242 | 1.160 | 2.173 |

|                                                                                                                                                                                                                                                                                        |       |       |       |       |       |
|----------------------------------------------------------------------------------------------------------------------------------------------------------------------------------------------------------------------------------------------------------------------------------------|-------|-------|-------|-------|-------|
| gi 24987656 pdb 1LXE A Chain A, Crystal Structure Of The Cathelicidin Motif Of Protegrins >gi 24987482 pdb 1KWI A Chain A, Crystal Structure Analysis Of The Cathelicidin Motif Of Protegrins                                                                                          | 1.000 | 0.329 | 1.160 | 0.826 | 2.176 |
| gi 311267406 ref XP_003131549.1  PREDICTED: gasdermin-B-like [Sus scrofa]                                                                                                                                                                                                              | 1.000 | 1.558 | 1.337 | 1.747 | 2.213 |
| gi 346644743 ref NP_001231138.1  calmodulin 3 [Sus scrofa] >gi 346644746 ref NP_001231139.1  calmodulin 1 [Sus scrofa] >gi 311252670 ref XP_003125211.1  PREDICTED: calmodulin-like [Sus scrofa]                                                                                       | 1.000 | 1.687 | 2.281 | 4.172 | 2.230 |
| gi 194040450 ref XP_001927992.1  PREDICTED: lactoylglutathione lyase isoform 1 [Sus scrofa]                                                                                                                                                                                            | 1.000 | 1.245 | 1.591 | 3.199 | 2.250 |
| gi 281500757 pdb 3FX4 A Chain A, Porcine Aldehyde Reductase In Ternary Complex With Inhibitor >gi 229597975 pdb 3H4G A Chain A, Structure Of Aldehyde Reductase Holoenzyme In Complex With Potent Aldose Reductase Inhibitor Fidarestat: Implications For Inhibitor Binding And S      | 1.000 | 3.159 | 1.610 | 1.180 | 2.261 |
| gi 311261988 ref XP_003128958.1  PREDICTED: phosphoglucomutase-2 [Sus scrofa]                                                                                                                                                                                                          | 1.000 | 1.677 | 1.345 | 1.583 | 2.313 |
| gi 194043292 ref XP_001928111.1  PREDICTED: 14-3-3 protein eta [Sus scrofa]                                                                                                                                                                                                            | 1.000 | 3.227 | 1.275 | 1.172 | 2.330 |
| gi 112980811 gb ABI29187.1  glyceraldehyde-3-phosphate dehydrogenase [Sus scrofa]                                                                                                                                                                                                      | 1.000 | 2.033 | 1.297 | 0.982 | 2.414 |
| gi 346986428 ref NP_001231362.1  heat shock 90kD protein 1, beta [Sus scrofa]                                                                                                                                                                                                          | 1.000 | 1.860 | 1.323 | 0.967 | 2.418 |
| gi 47523764 ref NP_999518.1  peptidyl-prolyl cis-trans isomerase A [Sus scrofa] >gi 51702768 sp P62936.2 PPIA_PIG RecName: Full=Peptidyl-prolyl cis-trans isomerase A; Short=PPIase A; AltName: Full=Cyclophilin A; AltName: Full=Cyclosporin A-binding protein; AltName: Full=Rotamas | 1.000 | 2.721 | 1.273 | 0.985 | 2.422 |
| gi 349732201 ref NP_001231854.1  dpy-30 homolog [Sus scrofa]                                                                                                                                                                                                                           | 1.000 | 0.546 | 1.038 | 2.141 | 2.438 |
| gi 1845 emb CAA48565.1  aminoacylase I [Sus scrofa]                                                                                                                                                                                                                                    | 1.000 | 1.855 | 2.955 | 3.909 | 2.438 |

|                                                                                                                                                                                                                                                                                            |       |       |       |       |       |
|--------------------------------------------------------------------------------------------------------------------------------------------------------------------------------------------------------------------------------------------------------------------------------------------|-------|-------|-------|-------|-------|
| gi 346644699 ref NP_001231019.1  protein SET [Sus scrofa]                                                                                                                                                                                                                                  | 1.000 | 1.404 | 4.301 | 2.967 | 2.469 |
| gi 237681312 ref NP_001153744.1  protein S100-A12 [Sus scrofa] >gi 126302600 sp P80310.2 S10AC_PIG RecName: Full=Protein S100-A12; AltName: Full=Calgranulin-C; Short=CAGC; AltName: Full=Extracellular newly identified RAGE-binding protein; Short=EN-RAGE; AltName: Full=S100 calcium-b | 1.000 | 0.787 | 1.875 | 1.494 | 2.476 |
| gi 122220 sp P17630.1 TCO1_PIG RecName: Full=Transcobalamin-1; Short=TC-1; AltName: Full=Cobalophilin; AltName: Full=Haptocorrin; AltName: Full=Protein R; AltName: Full=Transcobalamin I; Short=TC I; Short=TCI; Flags: Precursor >gi 1964 emb CAA36800.1  unnamed protein product [Sus   | 1.000 | 1.622 | 1.801 | 1.275 | 2.573 |
| gi 335284301 ref XP_003354567.1  PREDICTED: T-complex protein 1 subunit zeta-like isoform 2 [Sus scrofa]                                                                                                                                                                                   | 1.000 | 2.957 | 1.740 | 1.338 | 2.699 |
| gi 190360639 ref NP_001121941.1  interferon-induced 17 kDa protein [Sus scrofa] >gi 182406743 gb ACB87600.1  interferon stimulated gene 15 [Sus scrofa]                                                                                                                                    | 1.000 | 0.780 | 2.300 | 4.581 | 2.706 |
| gi 1364248 emb CAA82246.1  glucosephosphate isomerase [Sus scrofa]                                                                                                                                                                                                                         | 1.000 | 2.652 | 1.874 | 1.372 | 2.710 |
| gi 350583022 ref XP_001927263.3  PREDICTED: 14-3-3 protein zeta/delta [Sus scrofa]                                                                                                                                                                                                         | 1.000 | 3.308 | 1.517 | 1.086 | 2.726 |
| gi 343962597 ref NP_001230636.1  cytosolic non-specific dipeptidase [Sus scrofa]                                                                                                                                                                                                           | 1.000 | 1.600 | 3.758 | 3.289 | 2.765 |
| gi 335281222 ref XP_003353764.1  PREDICTED: probable 2-ketogluconate reductase-like isoform 2 [Sus scrofa]                                                                                                                                                                                 | 1.000 | 2.964 | 2.138 | 1.420 | 2.895 |
| gi 194043017 ref XP_001928354.1  PREDICTED: MGC159817 protein isoform 1 [Sus scrofa]                                                                                                                                                                                                       | 1.000 | 2.079 | 1.832 | 2.726 | 2.978 |
| gi 311259408 ref XP_003128090.1  PREDICTED: peroxiredoxin-1 isoform 5 [Sus scrofa]                                                                                                                                                                                                         | 1.000 | 2.943 | 1.704 | 1.309 | 3.046 |
| gi 90200404 gb ABD92704.1  triosephosphate isomerase 1 [Sus scrofa]                                                                                                                                                                                                                        | 1.000 | 2.706 | 1.493 | 1.114 | 3.048 |
| gi 219521990 ref NP_001137182.1  granzyme B                                                                                                                                                                                                                                                | 1.000 | 1.167 | 3.528 | 4.173 | 3.057 |

|                                                                                                                                                               |       |       |       |       |       |
|---------------------------------------------------------------------------------------------------------------------------------------------------------------|-------|-------|-------|-------|-------|
| precursor [Sus scrofa] >gi 216408333 gb ACJ72857.1  granzyme B [Sus scrofa]                                                                                   |       |       |       |       |       |
| gi 7288152 dbj BAA92850.1  esterase D [Sus scrofa]                                                                                                            | 1.000 | 3.122 | 1.562 | 2.008 | 3.194 |
| gi 229620 prf 770227A dehydrogenase H4,lactate                                                                                                                | 1.000 | 2.789 | 2.491 | 1.866 | 3.254 |
| gi 264681436 ref NP_001161113.1  copper transport protein ATOX1 [Sus scrofa] >gi 262036932 dbj BAI47601.1  antioxidant protein 1 homolog (yeast) [Sus scrofa] | 1.000 | 1.280 | 2.727 | 3.209 | 3.307 |
| gi 335300686 ref XP_003358992.1  PREDICTED: carbonyl reductase [NADPH] 1-like [Sus scrofa]                                                                    | 1.000 | 3.339 | 1.314 | 1.332 | 3.405 |
| gi 47523158 ref NP_999015.1  glutathione S-transferase A2 [Sus scrofa] >gi 1185280 emb CAA93434.1  glutathione S-transferase [Sus scrofa]                     | 1.000 | 2.229 | 1.726 | 1.798 | 3.489 |
| gi 162952052 ref NP_001106151.1  transketolase [Sus scrofa] >gi 159502444 gb ABW97521.1  transketolase [Sus scrofa]                                           | 1.000 | 1.819 | 2.627 | 3.235 | 3.514 |
| gi 116047849 gb ABJ53147.1  glutathione S-transferase mu 2 [Sus scrofa]                                                                                       | 1.000 | 2.290 | 1.598 | 1.589 | 3.519 |
| gi 350597032 ref XP_001925921.4  PREDICTED: aldehyde dehydrogenase family 1 member A3, partial [Sus scrofa]                                                   | 1.000 | 2.310 | 4.200 | 3.338 | 3.713 |
| gi 311251248 ref XP_003124516.1  PREDICTED: apoptosis-associated speck-like protein containing a CARD-like isoform 1 [Sus scrofa]                             | 1.000 | 3.139 | 6.012 | 6.925 | 3.814 |
| gi 266018 gb AAB25484.1  calmodulin=low affinity vasoactive intestinal polypeptide binding protein [swine, liver, Peptide Partial, 34 aa]                     | 1.000 | 1.397 | 2.473 | 2.726 | 4.203 |
